# Supplementary material for: Highly efficient iron-catalyzed conjugate reduction of α,β-unsaturated ketones with polymethylhydrosiloxane
Source: Royal Society of Chemistry journal article supplement (doi:10.1039/d4ob00664j), 2024-01-01

# Supporting Information

## Highly Efficient Iron-Catalyzed Conjugate Reduction of $\alpha,\beta$ -Unsaturated Ketones with Polymethylhydrosiloxane

Hang Wang, Libo Chen, Yushuang Chen\* and Yulong Zhang\*

### Table of Contents

|                                                                                                  |           |
|--------------------------------------------------------------------------------------------------|-----------|
| <b>I. General Information</b> .....                                                              | <b>2</b>  |
| <b>II. Optimization of the Reaction Conditions</b> .....                                         | <b>2</b>  |
| <b>III. General Procedure for Fe-Catalyzed Conjugate Reduction of Chalcone Derivatives</b> ..... | <b>5</b>  |
| <b>IV. Procedure for the Scale-up Reaction and the Transformation of Product</b> .....           | <b>6</b>  |
| <b>V. Unsuccessful substrate scope</b> .....                                                     | <b>7</b>  |
| <b>VI. Proposed Mechanism</b> .....                                                              | <b>7</b>  |
| <b>VII. The Analytical and Spectral Characterization Data of Products</b> .....                  | <b>8</b>  |
| <b>VIII. Spectroscopic Data (NMR and IR Spectrum)</b> .....                                      | <b>33</b> |

## I. General Information

FeCl<sub>3</sub>, PMHS, and (CF<sub>3</sub>)<sub>2</sub>CHOH were purchased from Adamas. All others reagents were purchased from commercial suppliers (Macklin, Knowles, KESHI, Aladdin and Energy Chemical) and used without further purification.

All compounds (starting materials and products) were characterized by <sup>1</sup>H NMR, <sup>13</sup>C NMR, IR spectroscopy and high-resolution mass spectroscopy. <sup>1</sup>H NMR spectra were recorded on Bruker 300 or 400 MHz spectrometer and are referenced relative to residual CDCl<sub>3</sub> proton signals at δ 7.26 ppm. <sup>19</sup>F NMR spectra were recorded on a Bruker 300 MHz spectrometer and are referenced to CFCl<sub>3</sub> (δ 0.0 ppm). Data for <sup>1</sup>H and <sup>19</sup>F NMR are reported as follows: chemical shift (δ ppm), multiplicity (s = singlet, d = doublet, t = triplet, q = quartet, m = multiplet, br = broad), integration, and coupling constant (Hz). <sup>13</sup>C NMR spectra were recorded on a Bruker 300 MHz spectrometer and are referenced to CDCl<sub>3</sub> at δ 77.16 ppm. The <sup>13</sup>C NMR spectra were obtained with <sup>1</sup>H decoupling. Data for <sup>13</sup>C NMR are reported in terms of chemical shift and multiplicity where appropriate. IR spectra were obtained on a Bruker Alpha and was reported in terms of frequency of absorption (cm<sup>-1</sup>). High Resolution Mass spectra were obtained from on an Agilent 6540 Q-TOF mass spectrometer, operating electrospray ionization (ESI) mode.

## II. Optimization of the Reaction Conditions

**Table S1.** The screen of metal salts <sup>[a]</sup>

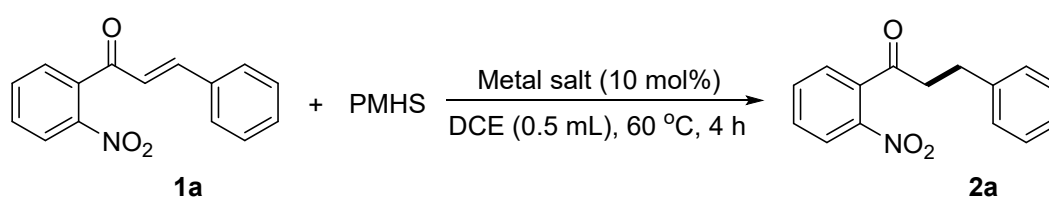

| Entry | Metal salt                           | Yield ( <b>2a</b> ) <sup>[b]</sup> |
|-------|--------------------------------------|------------------------------------|
| 1     | none                                 | 0%                                 |
| 2     | Co(acac) <sub>2</sub>                | trace                              |
| 3     | VO(acac) <sub>2</sub>                | 0%                                 |
| 4     | Ni(acac) <sub>2</sub>                | 0%                                 |
| 5     | MoO <sub>2</sub> (acac) <sub>2</sub> | 0%                                 |
| 6     | Mn(acac) <sub>3</sub>                | trace                              |

|    |                                        |     |
|----|----------------------------------------|-----|
| 7  | Fe(acac) <sub>3</sub>                  | 0%  |
| 8  | Cu(OAc) <sub>2</sub>                   | 0%  |
| 9  | Co(OAc) <sub>2</sub>                   | 0%  |
| 10 | Fe(OAc) <sub>2</sub>                   | 0%  |
| 11 | Zn(OAc) <sub>2</sub>                   | 0%  |
| 12 | CuPF <sub>6</sub> ·4CH <sub>3</sub> CN | 14% |
| 13 | MnBr <sub>2</sub> ·4H <sub>2</sub> O   | 0%  |
| 14 | Sm(OTf) <sub>3</sub>                   | 16% |
| 15 | Ni(OTf) <sub>2</sub>                   | 20% |
| 16 | Sc(OTf) <sub>3</sub>                   | 25% |
| 17 | Cu(OTf) <sub>2</sub>                   | 59% |
| 18 | FeCl <sub>3</sub>                      | 84% |

[a] Conditions: **1a** (50.7 mg, 0.20 mmol, 1.0 equiv), metal salt (0.020 mmol, 10 mol%), PMHS (100 μL, 2.2 equiv) in DCE (0.5 mL) at 60 °C for 4 h.

[b] Isolated yield.

**Table S2.** The screen of additive <sup>[a]</sup>

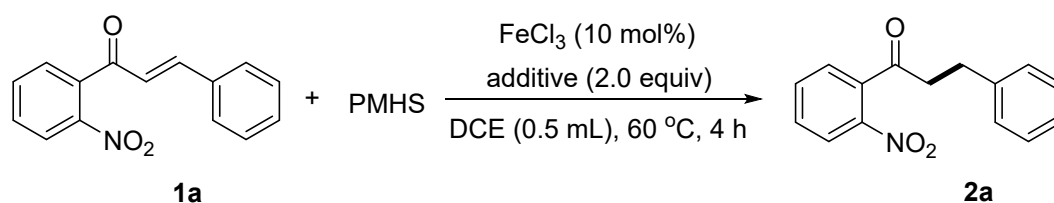

| Entry | additive                        | Catalyst          | Yield ( <b>2a</b> ) <sup>[b]</sup> |
|-------|---------------------------------|-------------------|------------------------------------|
| 1     | NH <sub>4</sub> F               | FeCl <sub>3</sub> | 0%                                 |
| 2     | CsF                             | FeCl <sub>3</sub> | 0%                                 |
| 3     | Cs <sub>2</sub> CO <sub>3</sub> | FeCl <sub>3</sub> | 0%                                 |
| 4     | LiF                             | FeCl <sub>3</sub> | 42%                                |
| 5     | NaF                             | FeCl <sub>3</sub> | 63%                                |
| 6     | KF                              | FeCl <sub>3</sub> | 0%                                 |
| 7     | K <sub>3</sub> PO <sub>4</sub>  | FeCl <sub>3</sub> | 0%                                 |

|    |                                      |                   |       |
|----|--------------------------------------|-------------------|-------|
| 8  | DABCO                                | FeCl <sub>3</sub> | 0%    |
| 9  | NH <sub>4</sub> Cl                   | FeCl <sub>3</sub> | 0%    |
| 10 | NH <sub>4</sub> OAc                  | FeCl <sub>3</sub> | 0%    |
| 11 | NaOAc                                | FeCl <sub>3</sub> | 0%    |
| 12 | TMG                                  | FeCl <sub>3</sub> | < 5%  |
| 13 | DBU                                  | FeCl <sub>3</sub> | 0%    |
| 14 | DIPEA                                | FeCl <sub>3</sub> | 0%    |
| 15 | morpholine                           | FeCl <sub>3</sub> | trace |
| 16 | NaHCO <sub>3</sub>                   | FeCl <sub>3</sub> | 0%    |
| 17 | (CF <sub>3</sub> ) <sub>2</sub> CHOH | FeCl <sub>3</sub> | 93%   |
| 18 | (CF <sub>3</sub> ) <sub>2</sub> CHOH | -                 | 0%    |

[a] Conditions: **1a** (50.7 mg, 0.20 mmol, 1.0 equiv), FeCl<sub>3</sub> (3.2 mg, 0.020 mmol, 10 mol%), additive (2.0 equiv), PMHS (100 μL, 2.2 equiv) in DCE (0.5 mL) at 60 °C for 4 h.

[b] Isolated yield.

**Table S3.** The screen of solvent [a]

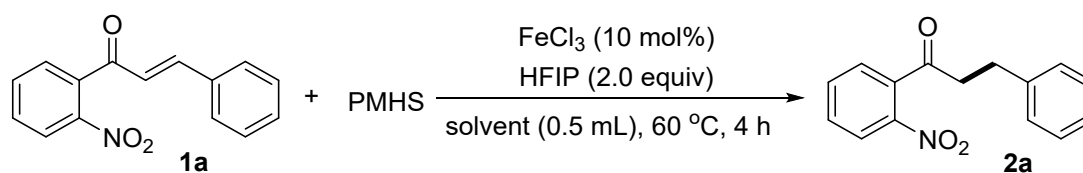

| Entry | solvent            | Yield ( <b>2a</b> ) <sup>[b]</sup> |
|-------|--------------------|------------------------------------|
| 1     | DCE                | 93%                                |
| 2     | THF                | 0%                                 |
| 3     | toluene            | 88%                                |
| 4     | CH <sub>3</sub> CN | 0%                                 |
| 5     | CHCl <sub>3</sub>  | 47%                                |
| 6     | 1,4-dioxane        | 0%                                 |
| 7     | DMAc               | 0%                                 |
| 8     | NMP                | trace                              |



|    |                   |     |
|----|-------------------|-----|
| 9  | EtOH              | 0%  |
| 10 | PhOMe             | 86% |
| 11 | MTBE              | 0%  |
| 12 | Ph <sub>2</sub> O | 84% |
| 13 | DMSO              | 0%  |

[a] Conditions: **1a** (50.7 mg, 0.20 mmol, 1.0 equiv), FeCl<sub>3</sub> (3.2 mg, 0.020 mmol, 10 mol%), (CF<sub>3</sub>)<sub>2</sub>CHOH (60 μL, 2.0 equiv), PMHS (100 μL, 2.2 equiv) in solvent (0.5 mL) at 60 °C for 4 h.

[b] Isolated yield.

**Table S4.** The screen of temperature [a]

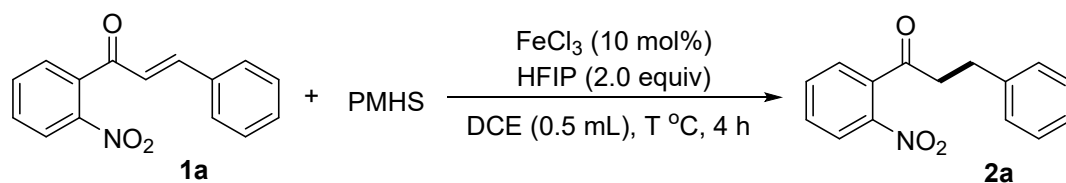

| Entry | T     | Yield ( <b>2a</b> ) <sup>[b]</sup> |
|-------|-------|------------------------------------|
| 1     | 25 °C | 86%                                |
| 2     | 35 °C | 88%                                |
| 3     | 60 °C | 93%                                |
| 4     | 90 °C | 90%                                |

[a] Conditions: **1a** (50.7 mg, 0.20 mmol, 1.0 equiv), FeCl<sub>3</sub> (3.2 mg, 0.020 mmol, 10 mol%), (CF<sub>3</sub>)<sub>2</sub>CHOH (60 μL, 2.0 equiv), PMHS (100 μL, 2.2 equiv) in DCE (0.5 mL) at T °C for 4 h.

[b] Isolated yield.

### III. General Procedure for Fe-Catalyzed Conjugate Reduction of Chalcone Derivatives

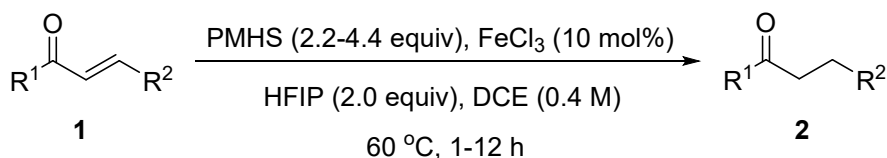

**General procedure:** Substituted enones **1** (0.20 mmol, 1.0 equiv) and FeCl<sub>3</sub> (3.2 mg, 0.020 mmol, 10 mol%) were dissolved in dry ClCH<sub>2</sub>CH<sub>2</sub>Cl (0.5 mL, 0.4 M solution). Then, (CF<sub>3</sub>)<sub>2</sub>CHOH (60.0 μL, 2.0 equiv) and PMHS (100.0-200.0 μL, 2.2-4.4 equiv) were added. The mixture was stirred in an oil bath at 60 °C for 1-12 h (the mixture was stirred at 400 rpm). After the reaction was complete, the mixture was extracted with EtOAc (5 mL × 3). The organic layer was concentrated to give the crude product. The mixture was purified by flash column chromatography (petroleum ether/EtOAc) to get the desired product **2**.

#### IV. Procedure for the scale-up reaction and the transformation of product.

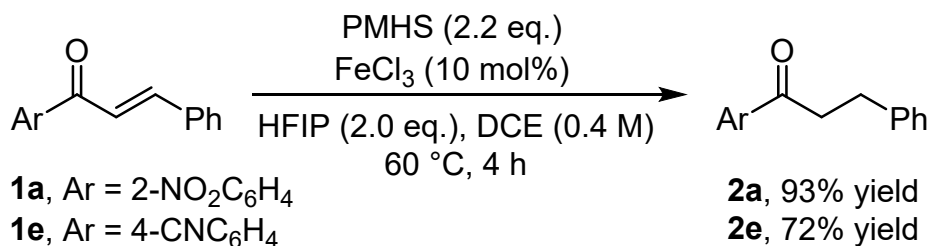

**General procedure:** An oven-dried 100 mL round-bottom flask was charged with **1a** (1.52 g, 6.0 mmol, 1.0 equiv), FeCl<sub>3</sub> (97.3 mg, 0.60 mmol, 10 mol%), (CF<sub>3</sub>)<sub>2</sub>CHOH (1.8 mL, 2.0 equiv), PMHS (3.0 mL, 2.2 equiv) and DCE (15 mL). The mixture was stirred in an oil bath at 60 °C for 4 h (the mixture was stirred at 400 rpm). After the reaction was complete, the mixture was extracted with EtOAc (20 mL × 3). The organic layer was concentrated to give the crude product. The product was purified by column chromatography on silica gel (EtOAc/PE = 1/10) to afford the title compound **2a** as a colorless liquid (1.42 g, 93% yield). The same procedure for substrate **1e**.

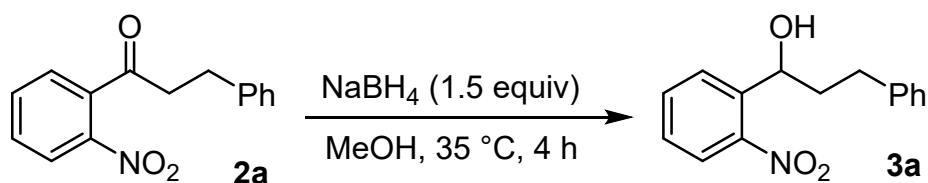

**General procedure:** Compound **2a** (153.2 mg, 0.60 mmol) was dissolved in MeOH (3 mL) and NaBH<sub>4</sub> (34.0 mg, 0.90 mmol, 1.5 equiv) was added. The mixture was stirred at 35 °C for 4 h, after the reaction was complete, the mixture was extracted with EtOAc. The organic layer was concentrated to give the crude product. The product was purified by column chromatography on silica gel (EtOAc/PE = 1/10) to afford the derivative compound 138.0 mg of **3a** as a colorless liquid (90% yield).

## V. Unsuccessful substrate scope

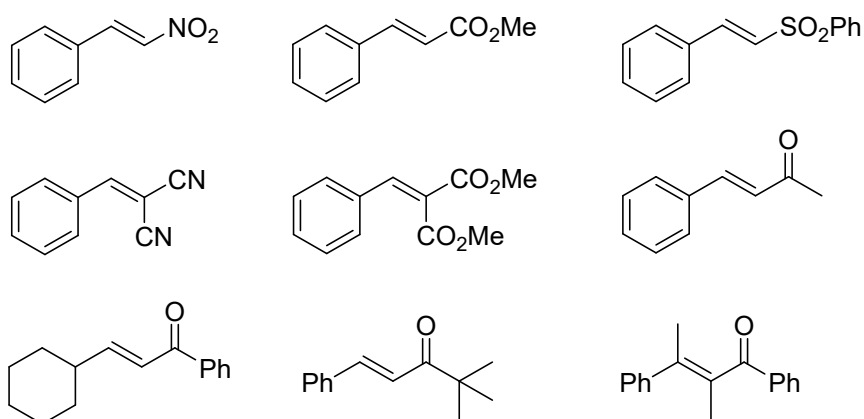

## VI. Proposed mechanism

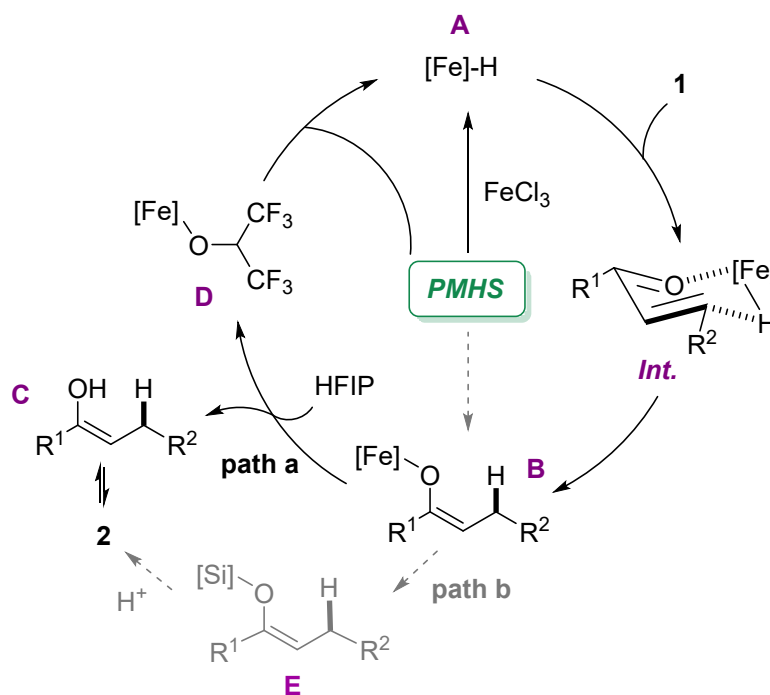

First, the precatalyst FeCl<sub>3</sub> could be reduced by PMHS to form iron hydride species **A**.

Then the  $\alpha,\beta$ -unsaturated ketone **1** could coordinate with species **A** followed by the insertion into a Fe–H bond to generate species **B** via a possible six-membered ring intermediate. Later, HFIP induced the proto-demetalation to generate species **C** followed by tautomerization to deliver the desired product **2** (path a). Besides, without the additive, the iron enolate species **B** would react with PMHS via  $\sigma$ -bond metathesis to afford a silyl enolate **E**. Subsequently, the target product **2** was obtained by the hydrolysis of **E** in the quenching step (path b). Such an explanation is consistent with the experimental finding that a higher yield was observed when the HFIP was added which could accelerate the regeneration of reactive species **A**.

## VII. The analytical and spectral characterization data of products.

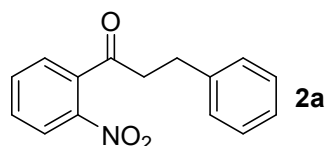

**1-(2-Nitrophenyl)-3-phenylpropan-1-one.** From **1a** (50.7 mg, 0.20 mmol, 1.0 equiv), the title compound was prepared following the general procedure using FeCl<sub>3</sub> (3.2 mg, 0.020 mmol, 10 mol %), (CF<sub>3</sub>)<sub>2</sub>CHOH (60.0  $\mu$ L, 2.0 equiv), PMHS (100.0  $\mu$ L, 2.2 equiv) and DCE (0.5 mL). The reaction mixture was stirred at 60 °C for 4 h. The crude product was purified by column chromatography on silica gel (EtOAc/PE = 1/10) to afford the title compound as a colorless liquid (47.2 mg, 93% yield).

**<sup>1</sup>H NMR** (300 MHz, CDCl<sub>3</sub>)  $\delta$  8.18 – 8.11 (m, 1H), 7.77 – 7.68 (m, 1H), 7.62 – 7.57 (m, 1H), 7.32 – 7.26 (m, 6H), 3.17 – 3.13 (m, 4H).

**<sup>13</sup>C NMR** (75 MHz, CDCl<sub>3</sub>)  $\delta$  201.8, 145.6, 140.5, 138.0, 134.4, 130.6, 128.6, 128.6, 128.4, 128.4, 127.3, 126.3, 124.4, 44.7, 30.1.

**HRMS** (ESI)  $m/z$ : [M + H]<sup>+</sup> Calculated for [C<sub>15</sub>H<sub>14</sub>NO<sub>3</sub><sup>+</sup>]: 256.0968, found 256.0971.

**IR** (neat, cm<sup>-1</sup>) 3028, 2866, 1703, 1604, 1573, 1523, 1453, 1344, 1205, 853, 788, 741, 697.

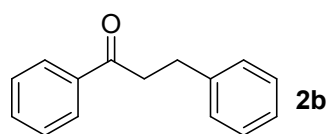

**1,3-Diphenylpropan-1-one.** From **1b** (41.7 mg, 0.20 mmol, 1.0 equiv), the title compound was prepared following the general procedure using FeCl<sub>3</sub> (3.2 mg, 0.020 mmol, 10 mol %), (CF<sub>3</sub>)<sub>2</sub>CHOH (60.0 μL, 2.0 equiv), PMHS (100.0 μL, 2.2 equiv) and DCE (0.5 mL). The reaction mixture was stirred at 60 °C for 4 h. The crude product was purified by column chromatography on silica gel (EtOAc/PE = 1/10) to afford the title compound as a colorless liquid (29.2 mg, 70% yield).

**<sup>1</sup>H NMR** (400 MHz, CDCl<sub>3</sub>) δ 7.88 – 7.87 (m, 1H), 7.86 – 7.85 (m, 1H), 7.47 – 7.43 (m, 1H), 7.37 – 7.33 (m, 2H), 7.21 – 7.19 (m, 2H), 7.17 – 7.15 (m, 2H), 7.13 – 7.11 (m, 1H), 3.20 (t, *J* = 8.0 Hz, 2H), 2.98 (t, *J* = 8.0 Hz, 2H).

**<sup>13</sup>C NMR** (75 MHz, CDCl<sub>3</sub>) δ 199.2, 141.4, 136.9, 133.2, 128.7, 128.7, 128.7, 128.7, 128.5, 128.5, 128.1, 128.1, 126.2, 40.5, 30.2.

**HRMS** (ESI) *m/z*: [M + H]<sup>+</sup> Calculated for [C<sub>15</sub>H<sub>15</sub>O<sup>+</sup>]: 211.1117, found 211.1120.

**IR** (neat, cm<sup>-1</sup>) 3061, 3026, 2924, 1680, 1595, 1580, 1494, 1448, 1364, 1290, 1205, 972, 908, 741, 699.

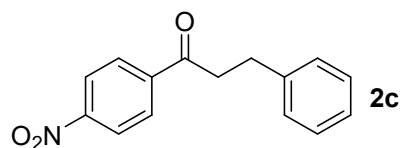

**1-(4-Nitrophenyl)-3-phenylpropan-1-one.** From **1c** (50.7 mg, 0.20 mmol, 1.0 equiv), the title compound was prepared following the general procedure using FeCl<sub>3</sub> (3.2 mg, 0.020 mmol, 10 mol %), (CF<sub>3</sub>)<sub>2</sub>CHOH (60.0 μL, 2.0 equiv), PMHS (100.0 μL, 2.2 equiv) and DCE (0.5 mL). The reaction mixture was stirred at 60 °C for 2 h. The crude product was purified by column chromatography on silica gel (EtOAc/PE = 1/10) to afford the title compound as a colorless liquid (37.1 mg, 72% yield).

**<sup>1</sup>H NMR** (300 MHz, CDCl<sub>3</sub>) δ 8.34 – 8.31 (m, 2H), 8.14 – 8.11 (m, 2H), 7.37 – 7.32 (m, 2H), 7.30 – 7.23 (m, 3H), 3.39 (t, *J* = 7.5 Hz, 2H), 3.13 (t, *J* = 7.5 Hz, 2H).

**<sup>13</sup>C NMR** (75 MHz, CDCl<sub>3</sub>) δ 197.7, 150.3, 141.2, 140.6, 129.1, 129.1, 128.7, 128.7, 128.4, 128.4, 126.4, 123.9, 123.9, 41.0, 29.9.

**HRMS** (ESI) *m/z*: [M + H]<sup>+</sup> Calculated for [C<sub>15</sub>H<sub>14</sub>NO<sub>3</sub><sup>+</sup>]: 256.0968, found 256.0970.

**IR** (neat, cm<sup>-1</sup>) 3028, 2923, 1692, 1603, 1524, 1496, 1453, 1344, 1198, 907, 853, 727.

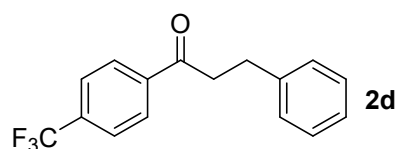

**1-(4-(Trifluoromethyl)phenyl)-3-phenylpropan-1-one.** From **1d** (55.3 mg, 0.20 mmol, 1.0 equiv), the title compound was prepared following the general procedure using FeCl<sub>3</sub> (3.2 mg, 0.020 mmol, 10 mol %), (CF<sub>3</sub>)<sub>2</sub>CHOH (60.0 μL, 2.0 equiv), PMHS (100.0 μL, 2.2 equiv) and DCE (0.5 mL). The reaction mixture was stirred at 60 °C for 2 h. The crude product was purified by column chromatography on silica gel (EtOAc/PE = 1/10) to afford the title compound as a colorless liquid (40.3 mg, 72% yield).

<sup>1</sup>H NMR (400 MHz, CDCl<sub>3</sub>) δ 7.96 – 7.94 (m, 2H), 7.63 – 7.61 (m, 2H), 7.23 – 7.20 (m, 2H), 7.17 – 7.14 (m, 2H), 7.12 – 7.07 (m, 1H), 3.23 (t, *J* = 8.0 Hz, 2H), 2.99 (t, *J* = 8.0 Hz, 2H).

<sup>13</sup>C NMR (101 MHz, CDCl<sub>3</sub>) δ 197.1, 139.8, 138.5, 133.3 (q, *J* = 32.3 Hz), 127.6, 127.6, 127.4, 127.4, 127.3, 127.3, 125.3, 124.6 (q, *J* = 4.0 Hz), 122.6 (q, *J* = 273.7 Hz), 39.7, 28.9.

<sup>19</sup>F NMR (282 MHz, CDCl<sub>3</sub>) δ -63.1.

HRMS (ESI) *m/z*: [M + H]<sup>+</sup> Calculated for [C<sub>16</sub>H<sub>14</sub>F<sub>3</sub>O<sup>+</sup>]: 279.0991, found 279.0994.

IR (neat, cm<sup>-1</sup>) 3029, 2930, 1691, 1604, 1584, 1496, 1454, 1410, 1323, 1166, 1125, 1065, 1015, 846, 746, 699.

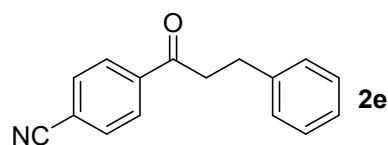

**4-(3-Phenylpropanoyl) benzonitrile.** From **1e** (46.7 mg, 0.20 mmol, 1.0 equiv), the title compound was prepared following the general procedure using FeCl<sub>3</sub> (3.2 mg, 0.020 mmol, 10 mol %), (CF<sub>3</sub>)<sub>2</sub>CHOH (60.0 μL, 2.0 equiv), PMHS (100.0 μL, 2.2 equiv) and DCE (0.5 mL). The reaction mixture was stirred at 60 °C for 3 h. The crude product was purified by column chromatography on silica gel (EtOAc/PE = 1/10) to afford the title compound as a colorless liquid (36.1 mg, 76% yield).

<sup>1</sup>H NMR (400 MHz, CDCl<sub>3</sub>) δ 7.93 – 7.92 (m, 1H), 7.91 – 7.90 (m, 1H), 7.65 – 7.64

(m, 1H), 7.63 – 7.62 (m, 1H), 7.22 – 7.18 (m, 2H), 7.15 – 7.13 (m, 2H), 7.12 – 7.09 (m, 1H), 3.21 (t,  $J = 8.0$  Hz, 2H), 2.97 (t,  $J = 8.0$  Hz, 2H).

$^{13}\text{C}$  NMR (75 MHz,  $\text{CDCl}_3$ )  $\delta$  197.9, 140.7, 139.7, 132.6, 132.6, 128.7, 128.7, 128.5, 128.5, 128.4, 128.4, 126.4, 118.0, 116.3, 40.8, 29.9.

HRMS (ESI)  $m/z$ :  $[\text{M} + \text{Na}]^+$  Calculated for  $[\text{C}_{16}\text{H}_{13}\text{NONa}^+]$ : 258.0889, found 258.0891.

IR (neat,  $\text{cm}^{-1}$ ) 3062, 3028, 2927, 2230, 1688, 1605, 1453, 1403, 1205, 800, 732, 698.

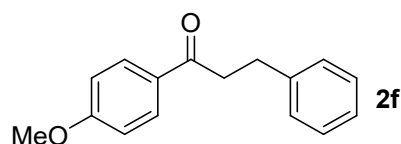

**1-(4-Methoxyphenyl)-3-phenylpropan-1-one.** From **1f** (47.7 mg, 0.20 mmol, 1.0 equiv), the title compound was prepared following the general procedure using  $\text{FeCl}_3$  (3.2 mg, 0.020 mmol, 10 mol %),  $(\text{CF}_3)_2\text{CHOH}$  (60.0  $\mu\text{L}$ , 2.0 equiv), PMHS (200.0  $\mu\text{L}$ , 4.4 equiv) and DCE (0.5 mL). The reaction mixture was stirred at 60  $^\circ\text{C}$  for 8 h. The crude product was purified by column chromatography on silica gel (EtOAc/PE = 1/10) to afford the title compound as a colorless liquid (32.2 mg, 67% yield).

$^1\text{H}$  NMR (400 MHz,  $\text{CDCl}_3$ )  $\delta$  7.86 – 7.82 (m, 2H), 7.22 – 7.18 (m, 2H), 7.17 – 7.14 (m, 2H), 7.12 – 7.08 (m, 1H), 3.75 (s, 3H), 3.15 (t,  $J = 8.0$  Hz, 2H), 2.96 (t,  $J = 8.0$  Hz, 2H).

$^{13}\text{C}$  NMR (75 MHz,  $\text{CDCl}_3$ )  $\delta$  197.9, 163.5, 141.5, 130.3, 130.3, 130.0, 128.5, 128.5, 128.5, 128.5, 126.1, 113.7, 113.7, 55.5, 40.2, 30.3.

HRMS (ESI)  $m/z$ :  $[\text{M} + \text{Na}]^+$  Calculated for  $[\text{C}_{16}\text{H}_{16}\text{O}_2\text{Na}^+]$ : 263.1043, found 263.1048.

IR (neat,  $\text{cm}^{-1}$ ) 3027, 2962, 2933, 1668, 1600, 1574, 1509, 1453, 1419, 1258, 1026, 905, 839, 727, 697.

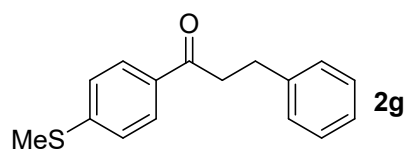

**1-(4-(Methylthio)phenyl)-3-phenylpropan-1-one.** From **1g** (50.9 mg, 0.20 mmol, 1.0 equiv), the title compound was prepared following the general procedure using  $\text{FeCl}_3$

(3.2 mg, 0.020 mmol, 10 mol %), (CF<sub>3</sub>)<sub>2</sub>CHOH (60.0 μL, 2.0 equiv), PMHS (200.0 μL, 4.4 equiv) and DCE (0.5 mL). The reaction mixture was stirred at 60 °C for 12 h. The crude product was purified by column chromatography on silica gel (EtOAc/PE = 1/20) to afford the title compound as a colorless liquid (33.9 mg, 66% yield).

<sup>1</sup>H NMR (400 MHz, CDCl<sub>3</sub>) δ 7.78 – 7.77 (m, 1H), 7.76 – 7.75 (m, 1H), 7.22 – 7.18 (m, 2H), 7.16 – 7.15 (m, 2H), 7.15 – 7.13 (m, 2H), 7.12 – 7.09 (m, 1H), 3.15 (t, *J* = 8.0 Hz, 2H), 2.96 (t, *J* = 8.0 Hz, 2H), 2.40 (s, 3H).

<sup>13</sup>C NMR (75 MHz, CDCl<sub>3</sub>) δ 198.3, 145.9, 141.3, 133.1, 128.6, 128.6, 128.5, 128.5, 128.5, 128.5, 126.2, 125.0, 125.0, 40.3, 30.2, 14.8.

HRMS (ESI) *m/z*: [M + Na]<sup>+</sup> Calculated for [C<sub>16</sub>H<sub>16</sub>OSNa<sup>+</sup>]: 279.0814, found 279.0816.

IR (neat, cm<sup>-1</sup>) 3063, 3027, 2922, 2858, 1661, 1588, 1554, 1490, 1451, 1399, 1209, 1076, 968, 908, 819, 773, 747, 697.

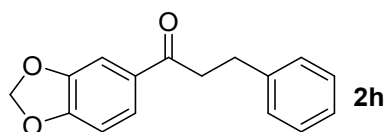

**1-(benzo[*d*][1,3]dioxol-6-yl)-3-phenylpropan-1-one.** From **1h** (50.5 mg, 0.20 mmol, 1.0 equiv), the title compound was prepared following the general procedure using FeCl<sub>3</sub> (3.2 mg, 0.020 mmol, 10 mol %), (CF<sub>3</sub>)<sub>2</sub>CHOH (60.0 μL, 2.0 equiv), PMHS (200.0 μL, 4.4 equiv) and DCE (0.5 mL). The reaction mixture was stirred at 60 °C for 10 h. The crude product was purified by column chromatography on silica gel (EtOAc/PE = 1/10) to afford the title compound as a colorless liquid (33.2 mg, 65% yield).

<sup>1</sup>H NMR (400 MHz, CDCl<sub>3</sub>) δ 7.49 – 7.47 (m, 1H), 7.37 – 7.36 (m, 1H), 7.24 – 7.20 (m, 2H), 7.18 – 7.16 (m, 2H), 7.15 – 7.11 (m, 1H), 6.77 – 6.75 (m, 1H), 5.96 (s, 2H), 3.15 (t, *J* = 8.0 Hz, 2H), 2.97 (t, *J* = 8.0 Hz, 2H).

<sup>13</sup>C NMR (75 MHz, CDCl<sub>3</sub>) δ 197.3, 151.8, 148.2, 141.4, 131.8, 128.6, 128.6, 128.5, 128.5, 126.2, 124.3, 107.9, 107.9, 101.9, 40.2, 30.4.

HRMS (ESI) *m/z*: [M + Na]<sup>+</sup> Calculated for [C<sub>16</sub>H<sub>14</sub>O<sub>3</sub>Na<sup>+</sup>]: 277.0835, found 277.0840.



**IR** (neat,  $\text{cm}^{-1}$ ) 3026, 2921, 2857, 1675, 1604, 1503, 1487, 1439, 1352, 1243, 1096, 1035, 931, 840, 807, 748, 698.

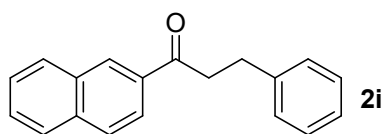

**1-(Naphthalen-6-yl)-3-phenylpropan-1-one.** From **1i** (51.7 mg, 0.20 mmol, 1.0 equiv), the title compound was prepared following the general procedure using  $\text{FeCl}_3$  (3.2 mg, 0.020 mmol, 10 mol %),  $(\text{CF}_3)_2\text{CHOH}$  (60.0  $\mu\text{L}$ , 2.0 equiv), PMHS (100.0  $\mu\text{L}$ , 2.2 equiv) and DCE (0.5 mL). The reaction mixture was stirred at 60  $^\circ\text{C}$  for 9 h. The crude product was purified by column chromatography on silica gel (EtOAc/PE = 1/10) to afford the title compound as a colorless liquid (31.2 mg, 60% yield).

**$^1\text{H}$  NMR** (400 MHz,  $\text{CDCl}_3$ )  $\delta$  8.33 – 8.32 (m, 1H), 7.93 – 7.90 (m, 1H), 7.81 – 7.79 (m, 1H), 7.76 – 7.72 (m, 2H), 7.48 – 7.39 (m, 2H), 7.23 – 7.21 (m, 1H), 7.20 – 7.16 (m, 3H), 7.13 – 7.08 (m, 1H), 3.31 (t,  $J = 8.0$  Hz, 2H), 3.02 (t,  $J = 8.0$  Hz, 2H).

**$^{13}\text{C}$  NMR** (75 MHz,  $\text{CDCl}_3$ )  $\delta$  199.2, 141.4, 135.6, 134.2, 132.6, 129.7, 129.6, 128.6, 128.6, 128.5, 128.5, 128.5, 127.8, 126.8, 126.2, 123.9, 40.6, 30.3.

**HRMS** (ESI)  $m/z$ :  $[\text{M} + \text{H}]^+$  Calculated for  $[\text{C}_{19}\text{H}_{17}\text{O}^+]$ : 261.1274, found 261.1274.

**IR** (neat,  $\text{cm}^{-1}$ ) 3059, 3026, 2923, 2851, 1679, 1627, 1598, 1453, 1260, 1123, 907, 731, 697.

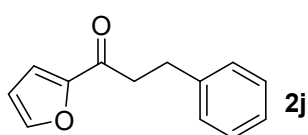

**1-(Furan-2-yl)-3-phenylpropan-1-one.** From **1j** (39.6 mg, 0.20 mmol, 1.0 equiv), the title compound was prepared following the general procedure using  $\text{FeCl}_3$  (3.2 mg, 0.020 mmol, 10 mol %),  $(\text{CF}_3)_2\text{CHOH}$  (60.0  $\mu\text{L}$ , 2.0 equiv), PMHS (150.0  $\mu\text{L}$ , 3.3 equiv) and DCE (0.5 mL). The reaction mixture was stirred at 60  $^\circ\text{C}$  for 4 h. The crude product was purified by column chromatography on silica gel (EtOAc/PE = 1/10) to afford the title compound as a colorless liquid (26.1 mg, 65% yield).

**$^1\text{H}$  NMR** (400 MHz,  $\text{CDCl}_3$ )  $\delta$  7.46 – 7.45 (m, 1H), 7.21 – 7.17 (m, 2H), 7.15 – 7.13 (m, 2H), 7.12 – 7.08 (m, 1H), 7.07 – 7.06 (m, 1H), 6.42 – 6.40 (m, 1H), 3.05 (t,  $J = 8.0$

Hz, 2H), 2.95 (t,  $J = 8.0$  Hz, 2H).

$^{13}\text{C}$  NMR (75 MHz,  $\text{CDCl}_3$ )  $\delta$  188.5, 152.6, 146.4, 141.0, 128.5, 128.5, 128.4, 128.4, 126.2, 117.1, 112.2, 40.2, 30.0.

HRMS (ESI)  $m/z$ :  $[\text{M} + \text{Na}]^+$  Calculated for  $[\text{C}_{13}\text{H}_{12}\text{O}_2\text{Na}^+]$ : 223.0730, found 223.0731.

IR (neat,  $\text{cm}^{-1}$ ) 3062, 3027, 2928, 1672, 1603, 1568, 1467, 1394, 1260, 1012, 882, 754, 697.

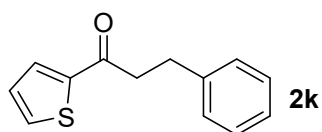

**3-Phenyl-1-(thiophen-2-yl)propan-1-one.** From **1k** (42.8 mg, 0.20 mmol, 1.0 equiv), the title compound was prepared following the general procedure using  $\text{FeCl}_3$  (3.2 mg, 0.020 mmol, 10 mol %),  $(\text{CF}_3)_2\text{CHOH}$  (60.0  $\mu\text{L}$ , 2.0 equiv), PMHS (150.0  $\mu\text{L}$ , 3.3 equiv) and DCE (0.5 mL). The reaction mixture was stirred at 60  $^\circ\text{C}$  for 5 h. The crude product was purified by column chromatography on silica gel (EtOAc/PE = 1/10) to afford the title compound as a colorless liquid (27.1 mg, 63% yield).

$^1\text{H}$  NMR (300 MHz,  $\text{CDCl}_3$ )  $\delta$  7.74 – 7.72 (m, 1H), 7.67 – 7.65 (m, 1H), 7.35 – 7.28 (m, 4H), 7.25 – 7.23 (m, 1H), 7.16 – 7.14 (m, 1H), 3.28 (t,  $J = 7.5$  Hz, 2H), 3.11 (t,  $J = 7.5$  Hz, 2H).

$^{13}\text{C}$  NMR (75 MHz,  $\text{CDCl}_3$ )  $\delta$  192.2, 144.2, 141.0, 133.6, 131.9, 128.6, 128.6, 128.5, 128.5, 128.1, 126.2, 41.2, 30.4.

HRMS (ESI)  $m/z$ :  $[\text{M} + \text{Na}]^+$  Calculated for  $[\text{C}_{13}\text{H}_{12}\text{OSNa}^+]$ : 239.0501, found 239.0503.

IR (neat,  $\text{cm}^{-1}$ ) 3063, 3028, 2928, 1657, 1603, 1518, 1496, 1414, 906, 721, 698.

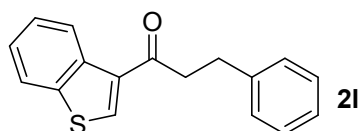

**1-(Benzo[b]thiophen-2-yl)-3-phenylpropan-1-one.** From **1l** (52.9 mg, 0.20 mmol, 1.0 equiv), the title compound was prepared following the general procedure using  $\text{FeCl}_3$  (3.2 mg, 0.020 mmol, 10 mol %),  $(\text{CF}_3)_2\text{CHOH}$  (60.0  $\mu\text{L}$ , 2.0 equiv), PMHS (200.0  $\mu\text{L}$ ,

4.4 equiv) and DCE (0.5 mL). The reaction mixture was stirred at 60 °C for 8 h. The crude product was purified by column chromatography on silica gel (EtOAc/PE = 1/20) to afford the title compound as a colorless liquid (32.8 mg, 63% yield).

**<sup>1</sup>H NMR** (300 MHz, CDCl<sub>3</sub>) δ 7.96 – 7.86 (m, 3H), 7.49 – 7.41 (m, 2H), 7.36 – 7.31 (m, 5H), 3.38 (t, *J* = 7.5 Hz, 2H), 3.15 (t, *J* = 7.5 Hz, 2H).

**<sup>13</sup>C NMR** (75 MHz, CDCl<sub>3</sub>) δ 193.7, 143.5, 142.5, 140.9, 139.1, 129.0, 128.6, 128.6, 128.5, 128.5, 127.5, 126.3, 126.0, 125.0, 123.0, 41.1, 30.4.

**HRMS** (ESI) *m/z*: [M + Na]<sup>+</sup> Calculated for [C<sub>17</sub>H<sub>14</sub>OSNa<sup>+</sup>]: 289.0658, found 289.0660.

**IR** (neat, cm<sup>-1</sup>) 3024, 2954, 2920, 2863, 1665, 1600, 1566, 1496, 1453, 1290, 1210, 1160, 905, 844, 726, 698.

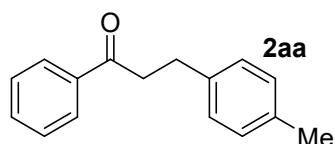

**1-Phenyl-3-p-tolylpropan-1-one.** From **1aa** (44.5 mg, 0.20 mmol, 1.0 equiv), the title compound was prepared following the general procedure using FeCl<sub>3</sub> (3.2 mg, 0.020 mmol, 10 mol %), (CF<sub>3</sub>)<sub>2</sub>CHOH (60.0 μL, 2.0 equiv), PMHS (150.0 μL, 3.3 equiv) and DCE (0.5 mL). The reaction mixture was stirred at 60 °C for 3 h. The crude product was purified by column chromatography on silica gel (EtOAc/PE = 1/10) to afford the title compound as a colorless liquid (31.3 mg, 70% yield).

**<sup>1</sup>H NMR** (400 MHz, CDCl<sub>3</sub>) δ 7.87 – 7.85 (m, 2H), 7.47 – 7.43 (m, 1H), 7.36 – 7.33 (m, 2H), 7.06 – 7.04 (m, 2H), 7.02 – 7.00 (m, 2H), 3.18 (t, *J* = 8.0 Hz, 2H), 2.93 (t, *J* = 8.0 Hz, 2H), 2.23 (s, 3H).

**<sup>13</sup>C NMR** (75 MHz, CDCl<sub>3</sub>) δ 199.3, 138.3, 136.9, 135.7, 133.1, 129.3, 129.3, 128.7, 128.7, 128.4, 128.4, 128.1, 128.1, 40.7, 29.8, 21.1.

**HRMS** (ESI) *m/z*: [M + Na]<sup>+</sup> Calculated for [C<sub>16</sub>H<sub>16</sub>ONa<sup>+</sup>]: 247.1093, found 247.1094.

**IR** (neat, cm<sup>-1</sup>) 3022, 2922, 2861, 1683, 1597, 1580, 1514, 1448, 1203, 973, 810, 740, 688.

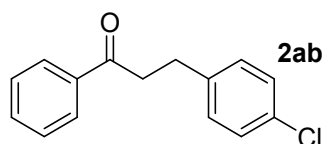

**3-(4-Chlorophenyl)-1-phenylpropan-1-one.** From **1ab** (48.5 mg, 0.20 mmol, 1.0 equiv), the title compound was prepared following the general procedure using  $\text{FeCl}_3$  (3.2 mg, 0.020 mmol, 10 mol %),  $(\text{CF}_3)_2\text{CHOH}$  (60.0  $\mu\text{L}$ , 2.0 equiv), PMHS (100.0  $\mu\text{L}$ , 2.2 equiv) and DCE (0.5 mL). The reaction mixture was stirred at 60 °C for 8 h. The crude product was purified by column chromatography on silica gel (EtOAc/PE = 1/10) to afford the title compound as a colorless liquid (34.7 mg, 72% yield).

$^1\text{H NMR}$  (300 MHz,  $\text{CDCl}_3$ )  $\delta$  8.00 – 7.98 (m, 2H), 7.63 – 7.58 (m, 1H), 7.52 – 7.47 (m, 2H), 7.31 – 7.29 (m, 2H), 7.24 – 7.21 (m, 2H), 3.32 (t,  $J = 7.5$  Hz, 2H), 3.08 (t,  $J = 7.5$  Hz, 2H).

$^{13}\text{C NMR}$  (75 MHz,  $\text{CDCl}_3$ )  $\delta$  198.9, 139.8, 136.7, 133.2, 131.9, 129.9, 129.9, 128.7, 128.7, 128.6, 128.6, 128.0, 128.0, 40.2, 29.4.

**HRMS** (ESI)  $m/z$ :  $[\text{M} + \text{H}]^+$  Calculated for  $[\text{C}_{15}\text{H}_{14}^{35}\text{ClO}^+]$ : 245.0728, found 245.0733.

**HRMS** (ESI)  $m/z$ :  $[\text{M} + \text{H}]^+$  Calculated for  $[\text{C}_{15}\text{H}_{14}^{37}\text{ClO}^+]$ : 247.0698, found 247.0699.

**IR** (neat,  $\text{cm}^{-1}$ ) 3027, 2931, 1684, 1597, 1580, 1492, 1448, 1091, 1015, 907, 814, 731, 688.

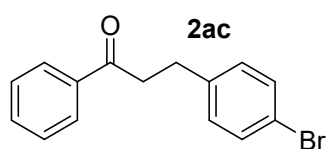

**3-(4-Bromophenyl)-1-phenylpropan-1-one.** From **1ac** (57.4 mg, 0.20 mmol, 1.0 equiv), the title compound was prepared following the general procedure using  $\text{FeCl}_3$  (3.2 mg, 0.020 mmol, 10 mol %),  $(\text{CF}_3)_2\text{CHOH}$  (60.0  $\mu\text{L}$ , 2.0 equiv), PMHS (100.0  $\mu\text{L}$ , 2.2 equiv) and DCE (0.5 mL). The reaction mixture was stirred at 60 °C for 5 h. The crude product was purified by column chromatography on silica gel (EtOAc/PE = 1/10) to afford the title compound as a colorless liquid (40.3 mg, 70% yield).

$^1\text{H NMR}$  (300 MHz,  $\text{CDCl}_3$ )  $\delta$  8.00 – 7.97 (m, 2H), 7.60 – 7.57 (m, 1H), 7.51 – 7.43 (m, 4H), 7.18 – 7.15 (m, 2H), 3.31 (t,  $J = 7.5$  Hz, 2H), 3.06 (t,  $J = 7.5$  Hz, 2H).

$^{13}\text{C NMR}$  (75 MHz,  $\text{CDCl}_3$ )  $\delta$  198.8, 140.3, 136.7, 133.2, 131.6, 131.6, 130.3, 130.3,

128.7, 128.7, 128.0, 128.0, 119.9, 40.1, 29.4.

**HRMS** (ESI)  $m/z$ :  $[M + Na]^+$  Calculated for  $[C_{15}H_{13}^{79}BrONa^+]$ : 311.0042, found 311.0043.

**HRMS** (ESI)  $m/z$ :  $[M + Na]^+$  Calculated for  $[C_{15}H_{13}^{81}BrONa^+]$ : 313.0022, found 313.0025.

**IR** (neat,  $cm^{-1}$ ) 3060, 2926, 1682, 1597, 1580, 1487, 1448, 1403, 1205, 1071, 1011, 908, 811, 731, 688.

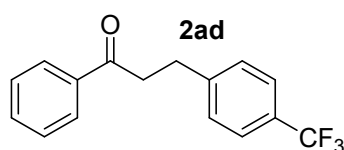

**3-(4-(trifluoromethyl)phenyl)-1-phenylpropan-1-one.** From **1ad** (55.3 mg, 0.20 mmol, 1.0 equiv), the title compound was prepared following the general procedure using  $FeCl_3$  (3.2 mg, 0.020 mmol, 10 mol %),  $(CF_3)_2CHOH$  (60.0  $\mu L$ , 2.0 equiv), PMHS (100.0  $\mu L$ , 2.2 equiv) and DCE (0.5 mL). The reaction mixture was stirred at 60  $^{\circ}C$  for 6 h. The crude product was purified by column chromatography on silica gel (EtOAc/PE = 1/10) to afford the title compound as a colorless liquid (40.2 mg, 72% yield).

**$^1H$  NMR** (400 MHz,  $CDCl_3$ )  $\delta$  7.88 – 7.86 (m, 2H), 7.50 – 7.45 (m, 3H), 7.39 – 7.35 (m, 2H), 7.29 – 7.27 (m, 2H), 3.24 (t,  $J = 8.0$  Hz, 2H), 3.05 (t,  $J = 8.0$  Hz, 2H).

**$^{13}C$  NMR** (101 MHz,  $CDCl_3$ )  $\delta$  197.5, 144.4, 135.7, 132.2, 127.8, 127.8, 127.6, 127.6, 127.2 (q,  $J = 32.3$  Hz), 127.0, 127.0, 124.4 (q,  $J = 4.0$  Hz), 123.3 (q,  $J = 273.7$  Hz), 38.8, 28.8.

**$^{19}F$  NMR** (282 MHz,  $CDCl_3$ )  $\delta$  -62.3.

**HRMS** (ESI)  $m/z$ :  $[M + Na]^+$  Calculated for  $[C_{16}H_{13}F_3ONa^+]$ : 301.0811, found 301.0816.

**IR** (neat,  $cm^{-1}$ ) 3063, 2930, 1685, 1618, 1598, 1581, 1449, 1323, 1106, 1066, 1018, 908, 828, 742, 692.

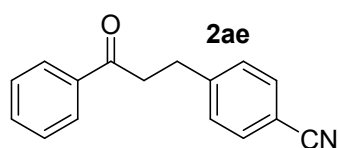

**4-(3-Oxo-3-phenylpropyl)benzointrile.** From **1ae** (46.7 mg, 0.20 mmol, 1.0 equiv), the title compound was prepared following the general procedure using FeCl<sub>3</sub> (3.2 mg, 0.020 mmol, 10 mol %), (CF<sub>3</sub>)<sub>2</sub>CHOH (60.0 μL, 2.0 equiv), PMHS (150.0 μL, 3.3 equiv) and DCE (0.5 mL). The reaction mixture was stirred at 60 °C for 10 h. The crude product was purified by column chromatography on silica gel (EtOAc/PE = 1/10) to afford the title compound as a colorless liquid (31.2 mg, 66% yield).

**<sup>1</sup>H NMR** (300 MHz, CDCl<sub>3</sub>) δ 7.99 – 7.97 (m, 2H), 7.63 – 7.60 (m, 3H), 7.52 – 7.47 (m, 2H), 7.41 – 7.39 (m, 2H), 3.36 (t, *J* = 7.5 Hz, 2H), 3.17 (t, *J* = 7.5 Hz, 2H).

**<sup>13</sup>C NMR** (75 MHz, CDCl<sub>3</sub>) δ 198.3, 147.0, 136.5, 133.4, 132.3, 132.3, 129.4, 129.4, 128.7, 128.7, 128.0, 128.0, 119.0, 110.1, 39.5, 30.0.

**HRMS** (ESI) *m/z*: [M + Na]<sup>+</sup> Calculated for [C<sub>16</sub>H<sub>13</sub>NONa<sup>+</sup>]: 258.0889, found 258.0893.

**IR** (neat, cm<sup>-1</sup>) 3062, 3037, 2926, 2227, 1683, 1606, 1505, 1448, 1205, 1018, 909, 825, 729, 689.

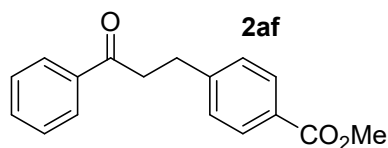

**Methyl 4-(3-oxo-3-phenylpropyl)benzoate.** From **1af** (53.3 mg, 0.20 mmol, 1.0 equiv), the title compound was prepared following the general procedure using FeCl<sub>3</sub> (3.2 mg, 0.020 mmol, 10 mol %), (CF<sub>3</sub>)<sub>2</sub>CHOH (60.0 μL, 2.0 equiv), PMHS (100.0 μL, 2.2 equiv) and DCE (0.5 mL). The reaction mixture was stirred at 60 °C for 4 h. The crude product was purified by column chromatography on silica gel (EtOAc/PE = 1/10) to afford the title compound as a colorless liquid (36.2 mg, 68% yield).

**<sup>1</sup>H NMR** (400 MHz, CDCl<sub>3</sub>) δ 7.89 – 7.87 (m, 2H), 7.87 – 7.86 (m, 2H), 7.49 – 7.45 (m, 1H), 7.39 – 7.35 (m, 2H), 7.25 – 7.23 (m, 2H), 3.81 (s, 3H), 3.24 (t, *J* = 8.0 Hz, 2H), 3.04 (t, *J* = 8.0 Hz, 2H).

**<sup>13</sup>C NMR** (75 MHz, CDCl<sub>3</sub>) δ 198.7, 167.0, 146.8, 136.7, 133.2, 129.9, 129.9, 128.7, 128.7, 128.5, 128.5, 128.0, 128.0, 121.6, 52.1, 39.8, 30.0.

**HRMS** (ESI) *m/z*: [M + Na]<sup>+</sup> Calculated for [C<sub>17</sub>H<sub>16</sub>O<sub>3</sub>Na<sup>+</sup>]: 291.0992, found 291.0993.

IR (neat,  $\text{cm}^{-1}$ ) 3031, 2952, 1711, 1682, 1606, 1434, 1277, 1178, 1099, 907, 766, 731, 687.

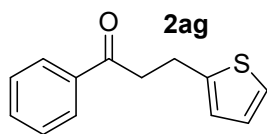

**1-Phenyl-3-(thiophen-2-yl) propan-1-one.** From **1ag** (42.9 mg, 0.20 mmol, 1.0 equiv), the title compound was prepared following the general procedure using  $\text{FeCl}_3$  (3.2 mg, 0.020 mmol, 10 mol %),  $(\text{CF}_3)_2\text{CHOH}$  (60.0  $\mu\text{L}$ , 2.0 equiv), PMHS (200.0  $\mu\text{L}$ , 4.4 equiv) and DCE (0.5 mL). The reaction mixture was stirred at 60  $^\circ\text{C}$  for 5 h. The crude product was purified by column chromatography on silica gel (EtOAc/PE = 1/10) to afford the title compound as a colorless liquid (27.9 mg, 64% yield).

$^1\text{H NMR}$  (400 MHz,  $\text{CDCl}_3$ )  $\delta$  7.60 – 7.58 (m, 1H), 7.52 – 7.51 (m, 1H), 7.22 – 7.19 (m, 2H), 7.16 – 7.15 (m, 2H), 7.13 – 7.09 (m, 1H), 7.02 – 7.00 (m, 1H), 3.14 (t,  $J = 8.0$  Hz, 2H), 2.98 (t,  $J = 8.0$  Hz, 2H).

$^{13}\text{C NMR}$  (75 MHz,  $\text{CDCl}_3$ )  $\delta$  198.6, 143.9, 136.7, 133.2, 128.7, 128.7, 128.1, 128.1, 126.9, 124.7, 123.4, 40.6, 24.2.

**HRMS** (ESI)  $m/z$ :  $[\text{M} + \text{Na}]^+$  Calculated for  $[\text{C}_{13}\text{H}_{12}\text{OSNa}^+]$ : 239.0501, found 239.0501.

IR (neat,  $\text{cm}^{-1}$ ) 3062, 2903, 2853, 1683, 1597, 1580, 1493, 1447, 1260, 1020, 798, 740, 687.

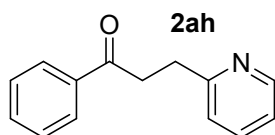

**1-Phenyl-3-(pyridin-2-yl) propan-1-one.** From **1ah** (41.8 mg, 0.20 mmol, 1.0 equiv), the title compound was prepared following the general procedure using  $\text{FeCl}_3$  (3.2 mg, 0.020 mmol, 10 mol %),  $(\text{CF}_3)_2\text{CHOH}$  (60.0  $\mu\text{L}$ , 2.0 equiv), PMHS (100.0  $\mu\text{L}$ , 2.2 equiv) and DCE (0.5 mL). The reaction mixture was stirred at 60  $^\circ\text{C}$  for 8 h. The crude product was purified by column chromatography on silica gel (EtOAc/PE = 1/10) to afford the title compound as a colorless liquid (19.1 mg, 46% yield).

$^1\text{H NMR}$  (300 MHz,  $\text{CDCl}_3$ )  $\delta$  8.51 – 8.49 (m, 1H), 8.00 – 7.97 (m, 2H), 7.62 – 7.58

(m, 1H), 7.46 – 7.43 (m, 3H), 7.29 – 7.23 (m, 1H), 7.12 – 7.08 (m, 1H), 3.68 (t,  $J = 7.5$  Hz, 2H), 3.51 (t,  $J = 7.5$  Hz, 2H).

$^{13}\text{C}$  NMR (75 MHz,  $\text{CDCl}_3$ )  $\delta$  198.6, 162.9, 149.2, 136.9, 136.4, 133.1, 128.6, 128.6, 128.1, 128.1, 124.2, 121.6, 43.6, 38.1.

HRMS (ESI)  $m/z$ :  $[\text{M} + \text{H}]^+$  Calculated for  $[\text{C}_{14}\text{H}_{14}\text{NO}^+]$ : 212.1070, found 212.1075.

IR (neat,  $\text{cm}^{-1}$ ) 3059, 2961, 1682, 1594, 1580, 1569, 1448, 1359, 1261, 1208, 1047, 837, 748, 688.

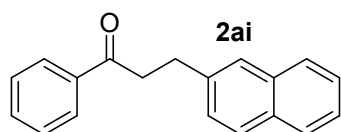

**3-(Naphthalen-3-yl)-1-phenylpropan-1-one.** From **1ai** (51.7 mg, 0.20 mmol, 1.0 equiv), the title compound was prepared following the general procedure using  $\text{FeCl}_3$  (3.2 mg, 0.020 mmol, 10 mol %),  $(\text{CF}_3)_2\text{CHOH}$  (60.0  $\mu\text{L}$ , 2.0 equiv), PMHS (100.0  $\mu\text{L}$ , 2.2 equiv) and DCE (0.5 mL). The reaction mixture was stirred at 60  $^\circ\text{C}$  for 6 h. The crude product was purified by column chromatography on silica gel (EtOAc/PE = 1/10) to afford the title compound as a colorless liquid (38.2 mg, 73% yield).

$^1\text{H}$  NMR (400 MHz,  $\text{CDCl}_3$ )  $\delta$  7.88 – 7.87 (m, 1H), 7.86 – 7.85 (m, 1H), 7.71 – 7.67 (m, 3H), 7.58 – 7.57 (m, 1H), 7.46 – 7.42 (m, 1H), 7.37 – 7.33 (m, 3H), 7.32 – 7.31 (m, 1H), 7.30 – 7.27 (m, 1H), 3.28 (t,  $J = 8.0$  Hz, 2H), 3.13 (t,  $J = 8.0$  Hz, 2H).

$^{13}\text{C}$  NMR (75 MHz,  $\text{CDCl}_3$ )  $\delta$  199.2, 138.8, 136.9, 133.7, 133.2, 132.1, 128.7, 128.7, 128.2, 128.1, 128.1, 127.7, 127.6, 127.2, 126.6, 126.1, 125.4, 40.4, 30.3.

HRMS (ESI)  $m/z$ :  $[\text{M} + \text{Na}]^+$  Calculated for  $[\text{C}_{19}\text{H}_{16}\text{ONa}^+]$ : 283.1093, found 283.1097.

IR (neat,  $\text{cm}^{-1}$ ) 3055, 2961, 2927, 1682, 1597, 1579, 1507, 1448, 1204, 975, 811, 740, 688.

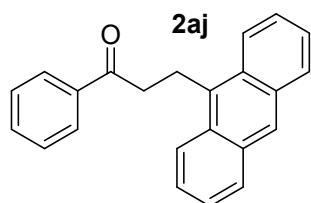

**3-(Anthracen-9-yl)-1-phenylpropan-1-one.** From **1aj** (61.6 mg, 0.20 mmol, 1.0 equiv), the title compound was prepared following the general procedure using  $\text{FeCl}_3$



(3.2 mg, 0.020 mmol, 10 mol %), (CF<sub>3</sub>)<sub>2</sub>CHOH (60.0 μL, 2.0 equiv), PMHS (200.0 μL, 4.4 equiv) and DCE (0.5 mL). The reaction mixture was stirred at 60 °C for 8 h. The crude product was purified by column chromatography on silica gel (EtOAc/PE = 1/10) to afford the title compound as a colorless liquid (42.4 mg, 67% yield).

<sup>1</sup>H NMR (300 MHz, CDCl<sub>3</sub>) δ 8.41 – 8.39 (m, 1H), 8.34 – 8.32 (m, 2H), 8.08 – 8.06 (m, 2H), 8.01 – 7.99 (m, 2H), 7.58 – 7.53 (m, 5H), 7.50 – 7.46 (m, 2H), 4.14 (t, *J* = 7.5 Hz, 2H), 3.50 (t, *J* = 7.5 Hz, 2H).

<sup>13</sup>C NMR (75 MHz, CDCl<sub>3</sub>) δ 199.4, 136.7, 133.5, 133.3, 131.7, 131.7, 129.6, 129.4, 129.4, 128.7, 128.7, 128.1, 128.1, 126.2, 126.2, 126.0, 126.0, 125.0, 125.0, 124.1, 124.1, 39.7, 22.0.

HRMS (ESI) *m/z*: [M + Na]<sup>+</sup> Calculated for [C<sub>23</sub>H<sub>18</sub>ONa<sup>+</sup>]: 333.1250, found 333.1251.

IR (neat, cm<sup>-1</sup>) 3053, 2964, 1681, 1622, 1596, 1579, 1446, 1347, 1260, 1203, 840, 728, 687.

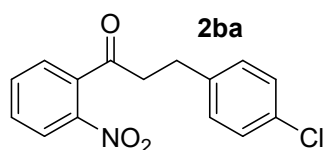

**3-(4-Chlorophenyl)-1-(2-nitrophenyl) propan-1-one.** From **1ba** (57.5 mg, 0.20 mmol, 1.0 equiv), the title compound was prepared following the general procedure using FeCl<sub>3</sub> (3.2 mg, 0.020 mmol, 10 mol %), (CF<sub>3</sub>)<sub>2</sub>CHOH (60.0 μL, 2.0 equiv), PMHS (100.0 μL, 2.2 equiv) and DCE (0.5 mL). The reaction mixture was stirred at 60 °C for 1 h. The crude product was purified by column chromatography on silica gel (EtOAc/PE = 1/10) to afford the title compound as a colorless liquid (52.1 mg, 90% yield).

<sup>1</sup>H NMR (300 MHz, CDCl<sub>3</sub>) δ 8.13 – 8.10 (m, 1H), 7.74 – 7.69 (m, 1H), 7.63 – 7.59 (m, 1H), 7.34 – 7.31 (m, 1H), 7.27 – 7.24 (m, 2H), 7.19 – 7.16 (m, 2H), 3.10 – 3.08 (m, 4H).

<sup>13</sup>C NMR (75 MHz, CDCl<sub>3</sub>) δ 201.3, 145.5, 139.0, 137.8, 134.4, 132.0, 130.7, 129.8, 129.8, 128.6, 128.6, 127.3, 124.5, 44.4, 29.3.

HRMS (ESI) *m/z*: [M + Na]<sup>+</sup> Calculated for [C<sub>15</sub>H<sub>12</sub>NO<sub>3</sub><sup>35</sup>ClNa<sup>+</sup>]: 312.0398, found 312.0401.

**HRMS** (ESI)  $m/z$ :  $[M + Na]^+$  Calculated for  $[C_{15}H_{12}NO_3^{37}ClNa^+]$ : 314.0368, found 314.0374.

**IR** (neat,  $cm^{-1}$ ) 2962, 2926, 2861, 1704, 1600, 1574, 1524, 1491, 1344, 1090, 1015, 853, 814, 787, 748, 699.

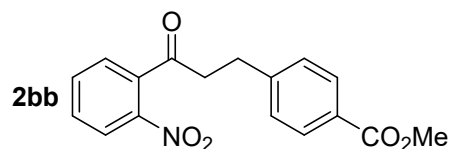

**Methyl 4-(3-(2-nitrophenyl)-3-oxopropyl)benzoate.** From **1bb** (62.3 mg, 0.20 mmol, 1.0 equiv), the title compound was prepared following the general procedure using  $FeCl_3$  (3.2 mg, 0.020 mmol, 10 mol %),  $(CF_3)_2CHOH$  (60.0  $\mu L$ , 2.0 equiv), PMHS (100.0  $\mu L$ , 2.2 equiv) and DCE (0.5 mL). The reaction mixture was stirred at 60  $^{\circ}C$  for 2 h. The crude product was purified by column chromatography on silica gel (EtOAc/PE = 1/10) to afford the title compound as a colorless liquid (54.4 mg, 86% yield).

**$^1H$  NMR** (300 MHz,  $CDCl_3$ )  $\delta$  8.15 – 8.12 (m, 1H), 7.98 – 7.96 (m, 2H), 7.74 – 7.69 (m, 1H), 7.64 – 7.59 (m, 1H), 7.33 – 7.30 (m, 3H), 3.91 (s, 3H), 3.22 – 3.10 (m, 4H).

**$^{13}C$  NMR** (75 MHz,  $CDCl_3$ )  $\delta$  201.2, 167.0, 146.0, 145.5, 137.8, 134.4, 130.6, 129.9, 129.9, 128.5, 128.5, 128.3, 127.2, 124.5, 52.1, 44.1, 30.0.

**HRMS** (ESI)  $m/z$ :  $[M + H]^+$  Calculated for  $[C_{17}H_{16}NO_5^+]$ : 314.1023, found 314.1024.

**IR** (neat,  $cm^{-1}$ ) 3033, 2999, 2953, 1708, 1610, 1574, 1525, 1435, 1345, 1217, 1080, 1103, 1019, 984, 909, 855, 732.

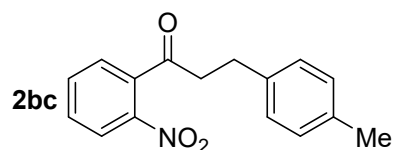

**1-(2-Nitrophenyl)-3-p-tolylpropan-1-one.** From **1bc** (53.5 mg, 0.20 mmol, 1.0 equiv), the title compound was prepared following the general procedure using  $FeCl_3$  (3.2 mg, 0.020 mmol, 10 mol %),  $(CF_3)_2CHOH$  (60.0  $\mu L$ , 2.0 equiv), PMHS (100.0  $\mu L$ , 2.2 equiv) and DCE (0.5 mL). The reaction mixture was stirred at 60  $^{\circ}C$  for 1 h. The crude product was purified by column chromatography on silica gel (EtOAc/PE = 1/10) to afford the title compound as a colorless liquid (48.3 mg, 89% yield).

**<sup>1</sup>H NMR** (300 MHz, CDCl<sub>3</sub>) δ 8.14 – 8.11 (m, 1H), 7.75 – 7.70 (m, 1H), 7.64 – 7.59 (m, 1H), 7.36 – 7.34 (m, 1H), 7.19 – 7.16 (m, 4H), 3.13 – 3.12 (m, 4H), 2.37 (s, 3H).

**<sup>13</sup>C NMR** (75 MHz, CDCl<sub>3</sub>) δ 201.9, 145.6, 138.0, 137.4, 135.8, 134.4, 130.6, 129.3, 129.3, 128.3, 128.3, 127.4, 124.4, 44.8, 29.7, 21.0.

**HRMS** (ESI) m/z: [M + Na]<sup>+</sup> Calculated for [C<sub>16</sub>H<sub>15</sub>NO<sub>3</sub>Na<sup>+</sup>]: 292.0944, found 292.0944.

**IR** (neat, cm<sup>-1</sup>) 2964, 2922, 1705, 1527, 1345, 1260, 1084, 1046, 906, 853, 729, 699.

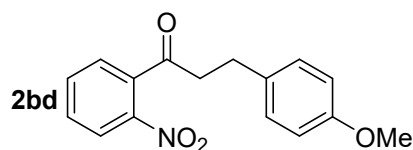

**3-(4-Methoxyphenyl)-1-(2-nitrophenyl) propan-1-one.** From **1bd** (37.4 mg, 0.20 mmol, 1.0 equiv), the title compound was prepared following the general procedure using FeCl<sub>3</sub> (3.2 mg, 0.020 mmol, 10 mol %), (CF<sub>3</sub>)<sub>2</sub>CHOH (60.0 μL, 2.0 equiv), PMHS (100.0 μL, 2.2 equiv) and DCE (0.5 mL). The reaction mixture was stirred at 60 °C for 1 h. The crude product was purified by column chromatography on silica gel (EtOAc/PE = 1/6) to afford the title compound as a colorless liquid (47.9 mg, 84% yield).

**<sup>1</sup>H NMR** (400 MHz, CDCl<sub>3</sub>) δ 7.99 – 7.97 (m, 1H), 7.59 – 7.55 (m, 1H), 7.49 – 7.45 (m, 1H), 7.19 – 7.17 (m, 1H), 7.04 – 7.01 (m, 2H), 6.73 – 6.70 (m, 2H), 3.66 (s, 3H), 2.98 – 2.92 (m, 4H).

**<sup>13</sup>C NMR** (75 MHz, CDCl<sub>3</sub>) δ 201.9, 158.1, 145.6, 138.0, 134.4, 132.5, 130.6, 129.4, 129.4, 127.3, 124.4, 114.0, 114.0, 55.3, 44.9, 29.2.

**HRMS** (ESI) m/z: [M + Na]<sup>+</sup> Calculated for [C<sub>16</sub>H<sub>15</sub>NO<sub>4</sub>Na<sup>+</sup>]: 308.0893, found 308.0896.

**IR** (neat, cm<sup>-1</sup>) 3033, 2959, 2934, 1707, 1611, 1575, 1527, 1511, 1345, 1244, 1032, 825, 729.

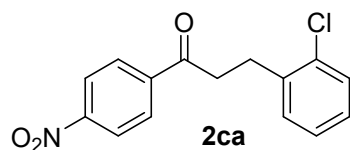

**3-(2-Chlorophenyl)-1-(4-nitrophenyl) propan-1-one.** From **1ca** (57.5 mg, 0.20 mmol, 1.0 equiv), the title compound was prepared following the general procedure using FeCl<sub>3</sub> (3.2 mg, 0.020 mmol, 10 mol %), (CF<sub>3</sub>)<sub>2</sub>CHOH (60.0 μL, 2.0 equiv), PMHS (100.0 μL, 2.2 equiv) and DCE (0.5 mL). The reaction mixture was stirred at 60 °C for 2 h. The crude product was purified by column chromatography on silica gel (EtOAc/PE = 1/10) to afford the title compound as a colorless liquid (38.3 mg, 66% yield).

<sup>1</sup>H NMR (300 MHz, CDCl<sub>3</sub>) δ 8.34 – 8.31 (m, 2H), 8.15 – 8.12 (m, 2H), 7.41 – 7.38 (m, 1H), 7.35 – 7.32 (m, 1H), 7.24 – 7.22 (m, 1H), 7.21 – 7.18 (m, 1H), 3.39 (t, *J* = 7.5 Hz, 2H), 3.22 (t, *J* = 7.5 Hz, 2H).

<sup>13</sup>C NMR (75 MHz, CDCl<sub>3</sub>) δ 197.5, 150.3, 141.1, 138.2, 133.9, 130.9, 129.7, 129.1, 129.1, 128.1, 127.1, 123.9, 123.9, 39.0, 28.2.

HRMS (ESI) *m/z*: [M + Na]<sup>+</sup> Calculated for [C<sub>15</sub>H<sub>12</sub>NO<sub>3</sub><sup>35</sup>ClNa<sup>+</sup>]: 312.0398, found 312.0399.

HRMS (ESI) *m/z*: [M + Na]<sup>+</sup> Calculated for [C<sub>15</sub>H<sub>12</sub>NO<sub>3</sub><sup>37</sup>ClNa<sup>+</sup>]: 314.0368, found 314.0370.

IR (neat, cm<sup>-1</sup>) 3072, 2962, 2859, 1692, 1602, 1522, 1475, 1443, 1343, 1199, 1107, 1051, 979, 853, 789, 740.

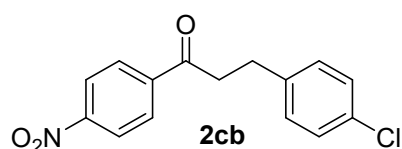

**3-(4-Chlorophenyl)-1-(4-nitrophenyl) propan-1-one.** From **1cb** (57.5 mg, 0.20 mmol, 1.0 equiv), the title compound was prepared following the general procedure using FeCl<sub>3</sub> (3.2 mg, 0.020 mmol, 10 mol %), (CF<sub>3</sub>)<sub>2</sub>CHOH (60.0 μL, 2.0 equiv), PMHS (100.0 μL, 2.2 equiv) and DCE (0.5 mL). The reaction mixture was stirred at 60 °C for 1 h. The crude product was purified by column chromatography on silica gel (EtOAc/PE = 1/10) to afford the title compound as a colorless liquid (39.2 mg, 67% yield).

<sup>1</sup>H NMR (300 MHz, CDCl<sub>3</sub>) δ 8.31 – 8.28 (m, 2H), 8.13 – 8.10 (m, 2H), 7.28 – 7.19 (m, 4H), 3.36 (t, *J* = 7.5 Hz, 2H), 3.08 (t, *J* = 7.5 Hz, 2H).

$^{13}\text{C}$  NMR (75 MHz,  $\text{CDCl}_3$ )  $\delta$  197.3, 150.3, 141.1, 139.1, 132.1, 129.8, 129.8, 129.0, 129.0, 128.7, 128.7, 123.9, 123.9, 40.7, 29.1.

**HRMS** (ESI)  $m/z$ :  $[\text{M} + \text{Na}]^+$  Calculated for  $[\text{C}_{15}\text{H}_{12}\text{NO}_3^{35}\text{ClNa}^+]$ : 312.0398, found 312.0402.

**HRMS** (ESI)  $m/z$ :  $[\text{M} + \text{Na}]^+$  Calculated for  $[\text{C}_{15}\text{H}_{12}\text{NO}_3^{37}\text{ClNa}^+]$ : 314.0368, found 314.0372.

**IR** (neat,  $\text{cm}^{-1}$ ) 3051, 2924, 2853, 1686, 1599, 1520, 1488, 1404, 1345, 1266, 1095, 906, 859, 811, 735.

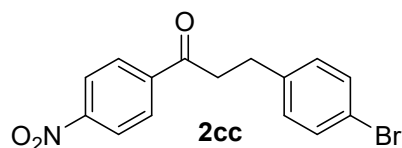

**3-(4-Bromophenyl)-1-(4-nitrophenyl) propan-1-one.** From **1cc** (66.4 mg, 0.20 mmol, 1.0 equiv), the title compound was prepared following the general procedure using  $\text{FeCl}_3$  (3.2 mg, 0.020 mmol, 10 mol %),  $(\text{CF}_3)_2\text{CHOH}$  (60.0  $\mu\text{L}$ , 2.0 equiv), PMHS (100.0  $\mu\text{L}$ , 2.2 equiv) and DCE (0.5 mL). The reaction mixture was stirred at 60  $^\circ\text{C}$  for 2 h. The crude product was purified by column chromatography on silica gel (EtOAc/PE = 1/10) to afford the title compound as a colorless liquid (42.2 mg, 64% yield).

$^1\text{H}$  NMR (300 MHz,  $\text{CDCl}_3$ )  $\delta$  8.32 – 8.29 (m, 2H), 8.13 – 8.10 (m, 2H), 7.44 – 7.41 (m, 2H), 7.17 – 7.14 (m, 2H), 3.36 (t,  $J = 7.5$  Hz, 2H), 3.07 (t,  $J = 7.5$  Hz, 2H).

$^{13}\text{C}$  NMR (75 MHz,  $\text{CDCl}_3$ )  $\delta$  197.2, 150.3, 141.1, 139.6, 131.7, 131.7, 130.2, 130.2, 129.0, 129.0, 123.9, 123.9, 120.1, 40.6, 29.1.

**HRMS** (ESI)  $m/z$ :  $[\text{M} + \text{Na}]^+$  Calculated for  $[\text{C}_{15}\text{H}_{12}\text{NO}_3^{79}\text{BrNa}^+]$ : 355.9893, found 355.9897.

**HRMS** (ESI)  $m/z$ :  $[\text{M} + \text{Na}]^+$  Calculated for  $[\text{C}_{15}\text{H}_{12}\text{NO}_3^{81}\text{BrNa}^+]$ : 357.9872, found 357.9872.

**IR** (neat,  $\text{cm}^{-1}$ ) 3111, 2926, 2854, 1687, 1600, 1521, 1487, 1404, 1343, 1261, 1196, 1071, 1010, 906, 852, 808, 729.

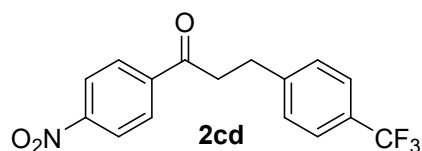

**3-(4-(Trifluoromethyl) phenyl)-1-(4-nitrophenyl) propan-1-one.** From **1cd** (64.3 mg, 0.20 mmol, 1.0 equiv), the title compound was prepared following the general procedure using FeCl<sub>3</sub> (3.2 mg, 0.020 mmol, 10 mol %), (CF<sub>3</sub>)<sub>2</sub>CHOH (60.0 μL, 2.0 equiv), PMHS (100.0 μL, 2.2 equiv) and DCE (0.5 mL). The reaction mixture was stirred at 60 °C for 1 h. The crude product was purified by column chromatography on silica gel (EtOAc/PE = 1/10) to afford the title compound as a colorless liquid (47.7 mg, 74% yield).

<sup>1</sup>H NMR (400 MHz, CDCl<sub>3</sub>) δ 8.22 – 8.20 (m, 2H), 8.03 – 8.00 (m, 2H), 7.48 – 7.46 (m, 2H), 7.30 – 7.28 (m, 2H), 3.30 (t, *J* = 8.0 Hz, 2H), 3.08 (t, *J* = 8.0 Hz, 2H).

<sup>13</sup>C NMR (75 MHz, CDCl<sub>3</sub>) δ 197.0, 150.4, 144.8, 141.0, 129.0, 129.0, 128.8, 128.8, 128.7 (q, *J* = 32.3 Hz), 125.5 (q, *J* = 3.8 Hz), 124.2 (q, *J* = 270.0 Hz), 123.9, 123.9, 40.4, 29.5.

<sup>19</sup>F NMR (282 MHz, CDCl<sub>3</sub>) δ -62.4.

**HRMS** (ESI) *m/z*: [M + Na]<sup>+</sup> Calculated for [C<sub>16</sub>H<sub>12</sub>F<sub>3</sub>NO<sub>3</sub>Na<sup>+</sup>]: 346.0661, found 346.0662.

**IR** (neat, cm<sup>-1</sup>) 3112, 2962, 2856, 1689, 1600, 1523, 1413, 1346, 1319, 1260, 1161, 1105, 1085, 1016, 907, 789, 734.

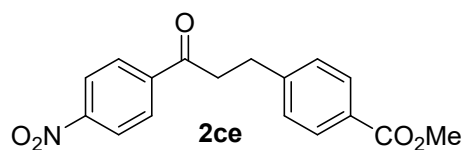

**Methyl 4-(3-(4-nitrophenyl)-3-oxopropyl) benzoate.** From **1ce** (62.3 mg, 0.20 mmol, 1.0 equiv), the title compound was prepared following the general procedure using FeCl<sub>3</sub> (3.2 mg, 0.020 mmol, 10 mol %), (CF<sub>3</sub>)<sub>2</sub>CHOH (60.0 μL, 2.0 equiv), PMHS (100.0 μL, 2.2 equiv) and DCE (0.5 mL). The reaction mixture was stirred at 60 °C for 2 h. The crude product was purified by column chromatography on silica gel (EtOAc/PE = 1/10) to afford the title compound as a colorless liquid (40.0 mg, 65% yield).

**$^1\text{H}$  NMR** (300 MHz,  $\text{CDCl}_3$ )  $\delta$  8.33 – 8.30 (m, 2H), 8.13 – 8.10 (m, 2H), 8.00 – 7.97 (m, 2H), 7.36 – 7.33 (m, 2H), 3.92 (s, 3H), 3.40 (t,  $J = 7.5$  Hz, 2H), 3.17 (t,  $J = 7.5$  Hz, 2H).

**$^{13}\text{C}$  NMR** (75 MHz,  $\text{CDCl}_3$ )  $\delta$  197.1, 166.9, 150.4, 146.1, 141.0, 130.0, 130.0, 129.1, 129.1, 128.5, 128.5, 128.4, 123.9, 123.9, 52.1, 40.4, 29.7.

**HRMS** (ESI)  $m/z$ :  $[\text{M} + \text{H}]^+$  Calculated for  $[\text{C}_{17}\text{H}_{16}\text{NO}_5^+]$ : 314.1023, found 314.1024.

**IR** (neat,  $\text{cm}^{-1}$ ) 2955, 2852, 1715, 1695, 1607, 1525, 1436, 1345, 1279, 1107, 1020, 906, 854, 728.

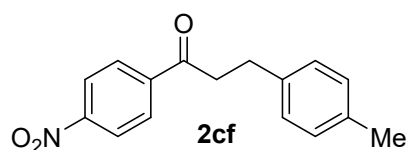

**1-(4-Nitrophenyl)-3-p-tolylpropan-1-one.** From **1cf** (53.5 mg, 0.20 mmol, 1.0 equiv), the title compound was prepared following the general procedure using  $\text{FeCl}_3$  (3.2 mg, 0.020 mmol, 10 mol %),  $(\text{CF}_3)_2\text{CHOH}$  (60.0  $\mu\text{L}$ , 2.0 equiv), PMHS (100.0  $\mu\text{L}$ , 2.2 equiv) and DCE (0.5 mL). The reaction mixture was stirred at 60  $^\circ\text{C}$  for 2 h. The crude product was purified by column chromatography on silica gel (EtOAc/PE = 1/10) to afford the title compound as a colorless liquid (35.5 mg, 66% yield).

**$^1\text{H}$  NMR** (400 MHz,  $\text{CDCl}_3$ )  $\delta$  8.22 – 8.20 (m, 2H), 8.02 – 7.99 (m, 2H), 7.07 – 7.05 (m, 2H), 7.04 – 7.02 (m, 2H), 3.24 (t,  $J = 8.0$  Hz, 2H), 2.97 (t,  $J = 8.0$  Hz, 2H), 2.24 (s, 3H).

**$^{13}\text{C}$  NMR** (75 MHz,  $\text{CDCl}_3$ )  $\delta$  197.8, 150.3, 141.3, 137.6, 135.9, 129.3, 129.3, 129.1, 129.1, 128.3, 128.3, 123.9, 123.9, 41.1, 29.5, 21.1.

**HRMS** (ESI)  $m/z$ :  $[\text{M} + \text{Na}]^+$  Calculated for  $[\text{C}_{16}\text{H}_{15}\text{NO}_3\text{Na}^+]$ : 292.0944, found 292.0945.

**IR** (neat,  $\text{cm}^{-1}$ ) 3112, 2920, 2855, 1686, 1599, 1519, 1407, 1345, 1318, 1199, 973, 865, 810, 796, 731.

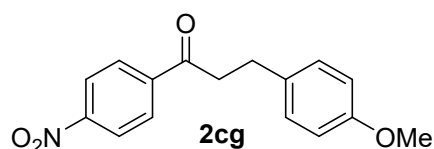

**3-(4-Methoxyphenyl)-1-(4-nitrophenyl) propan-1-one.** From **1cg** (56.7 mg, 0.20 mmol, 1.0 equiv), the title compound was prepared following the general procedure using FeCl<sub>3</sub> (3.2 mg, 0.020 mmol, 10 mol %), (CF<sub>3</sub>)<sub>2</sub>CHOH (60.0 μL, 2.0 equiv), PMHS (100.0 μL, 2.2 equiv) and DCE (0.5 mL). The reaction mixture was stirred at 60 °C for 2 h. The crude product was purified by column chromatography on silica gel (EtOAc/PE = 1/10) to afford the title compound as a colorless liquid (36.8 mg, 64% yield).

<sup>1</sup>H NMR (300 MHz, CDCl<sub>3</sub>) δ 8.31 – 8.28 (m, 2H), 8.12 – 8.09 (m, 2H), 7.20 – 7.17 (m, 2H), 6.87 – 6.84 (m, 2H), 3.80 (s, 3H), 3.34 (t, *J* = 7.5 Hz, 2H), 3.05 (t, *J* = 7.5 Hz, 2H).

<sup>13</sup>C NMR (75 MHz, CDCl<sub>3</sub>) δ 197.9, 158.1, 150.2, 141.3, 132.6, 129.4, 129.4, 129.1, 129.1, 123.9, 123.9, 114.0, 114.0, 55.3, 41.2, 29.0.

HRMS (ESI) *m/z*: [M + Na]<sup>+</sup> Calculated for [C<sub>16</sub>H<sub>15</sub>NO<sub>4</sub>Na<sup>+</sup>]: 308.0893, found 308.0897.

IR (neat, cm<sup>-1</sup>) 3076, 2959, 2925, 1689, 1604, 1511, 1344, 1244, 1030, 820, 796.

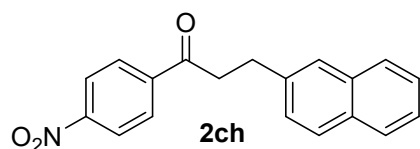

**3-(Naphthalen-3-yl)-1-(4-nitrophenyl) propan-1-one.** From **1ch** (37.4 mg, 0.20 mmol, 1.0 equiv), the title compound was prepared following the general procedure using FeCl<sub>3</sub> (3.2 mg, 0.020 mmol, 10 mol %), (CF<sub>3</sub>)<sub>2</sub>CHOH (60.0 μL, 2.0 equiv), PMHS (100.0 μL, 2.2 equiv) and DCE (0.5 mL). The reaction mixture was stirred at 60 °C for 2 h. The crude product was purified by column chromatography on silica gel (EtOAc/PE = 1/10) to afford the title compound as a colorless liquid (37.3 mg, 61% yield).

<sup>1</sup>H NMR (400 MHz, CDCl<sub>3</sub>) δ 8.17 – 8.16 (m, 1H), 8.15 – 8.14 (m, 1H), 7.99 – 7.97 (m, 1H), 7.96 – 7.95 (m, 1H), 7.71 – 7.66 (m, 3H), 7.58 – 7.57 (m, 1H), 7.36 – 7.32 (m, 2H), 7.29 – 7.26 (m, 1H), 3.31 (t, *J* = 8.0 Hz, 2H), 3.15 (t, *J* = 8.0 Hz, 2H).

<sup>13</sup>C NMR (75 MHz, CDCl<sub>3</sub>) δ 197.6, 150.3, 141.2, 138.1, 133.6, 132.2, 129.1, 129.1, 128.3, 127.7, 127.5, 127.0, 126.6, 126.2, 125.5, 123.9, 123.9, 40.9, 30.0.



**HRMS** (ESI)  $m/z$ :  $[M + Na]^+$  Calculated for  $[C_{19}H_{15}NO_3Na^+]$ : 328.0944, found 328.0945.

**IR** (neat,  $cm^{-1}$ ) 3050, 2924, 2854, 1686, 1600, 1518, 1404, 1342, 1260, 1195, 1103, 1012, 907, 854, 804, 735.

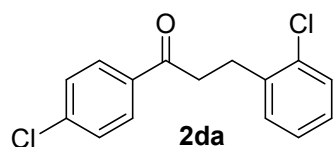

**3-(2-Chlorophenyl)-1-(4-chlorophenyl) propan-1-one.** From **1da** (55.4 mg, 0.20 mmol, 1.0 equiv), the title compound was prepared following the general procedure using  $FeCl_3$  (3.2 mg, 0.020 mmol, 10 mol %),  $(CF_3)_2CHOH$  (60.0  $\mu L$ , 2.0 equiv), PMHS (100.0  $\mu L$ , 2.2 equiv) and DCE (0.5 mL). The reaction mixture was stirred at 60  $^{\circ}C$  for 1.5 h. The crude product was purified by column chromatography on silica gel (EtOAc/PE = 1/10) to afford the title compound as a colorless liquid (31.0 mg, 55% yield).

**$^1H$  NMR** (300 MHz,  $CDCl_3$ )  $\delta$  7.92 – 7.90 (m, 2H), 7.45 – 7.41 (m, 2H), 7.38 – 7.36 (m, 1H), 7.32 – 7.31 (m, 1H), 7.21 – 7.19 (m, 2H), 3.31 – 3.27 (m, 2H), 3.20 – 3.18 (m, 2H).

**$^{13}C$  NMR** (75 MHz,  $CDCl_3$ )  $\delta$  197.7, 139.5, 138.6, 135.0, 133.9, 130.8, 129.6, 129.5, 129.5, 128.9, 128.9, 127.9, 127.0, 38.4, 28.3.

**HRMS** (ESI)  $m/z$ :  $[M + Na]^+$  Calculated for  $[C_{15}H_{12}O^{35}Cl_2Na^+]$ : 301.0157, found 301.0158.

**HRMS** (ESI)  $m/z$ :  $[M + Na]^+$  Calculated for  $[C_{15}H_{12}O^{35}Cl^{37}ClNa^+]$ : 303.0128, found 303.0130.

**HRMS** (ESI)  $m/z$ :  $[M + Na]^+$  Calculated for  $[C_{15}H_{12}O^{37}Cl_2Na^+]$ : 305.0098, found 305.0101.

**IR** (neat,  $cm^{-1}$ ) 3063, 2938, 1684, 1588, 1572, 1488, 1443, 1400, 1203, 1090, 1013, 976, 907, 831, 750, 729.

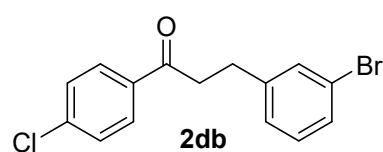

**3-(3-Bromophenyl)-1-(4-chlorophenyl) propan-1-one.** From **1db** (64.3 mg, 0.20 mmol, 1.0 equiv), the title compound was prepared following the general procedure using FeCl<sub>3</sub> (3.2 mg, 0.020 mmol, 10 mol %), (CF<sub>3</sub>)<sub>2</sub>CHOH (60.0 μL, 2.0 equiv), PMHS (100.0 μL, 2.2 equiv) and DCE (0.5 mL). The reaction mixture was stirred at 60 °C for 2 h. The crude product was purified by column chromatography on silica gel (EtOAc/PE = 1/10) to afford the title compound as a colorless liquid (35.3 mg, 55% yield).

<sup>1</sup>H NMR (400 MHz, CDCl<sub>3</sub>) δ 7.81 – 7.80 (m, 1H), 7.79 – 7.78 (m, 1H), 7.35 – 7.34 (m, 1H), 7.33 – 7.31 (m, 2H), 7.26 – 7.23 (m, 1H), 7.10 – 7.06 (m, 2H), 3.16 (t, *J* = 8.0 Hz, 2H), 2.94 (t, *J* = 8.0 Hz, 2H).

<sup>13</sup>C NMR (75 MHz, CDCl<sub>3</sub>) δ 197.4, 143.5, 139.6, 135.0, 131.5, 130.1, 129.5, 129.5, 129.4, 129.0, 129.0, 127.2, 122.6, 40.0, 29.5.

HRMS (ESI) *m/z*: [M + Na]<sup>+</sup> Calculated for [C<sub>15</sub>H<sub>12</sub>O<sup>35</sup>Cl<sup>79</sup>BrNa<sup>+</sup>]: 344.9652, found 344.9653.

HRMS (ESI) *m/z*: [M + Na]<sup>+</sup> Calculated for [C<sub>15</sub>H<sub>12</sub>O<sup>35</sup>Cl<sup>81</sup>BrNa<sup>+</sup>]: 346.9632, found 346.9632.

IR (neat, cm<sup>-1</sup>) 3060, 2929, 1683, 1588, 1568, 1487, 1400, 1203, 1090, 978, 906, 778, 729.

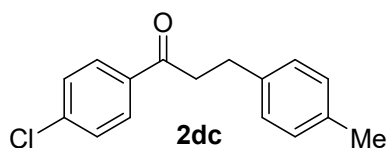

**1-(4-Chlorophenyl)-3-p-tolylpropan-1-one.** From **1dc** (51.3 mg, 0.20 mmol, 1.0 equiv), the title compound was prepared following the general procedure using FeCl<sub>3</sub> (3.2 mg, 0.020 mmol, 10 mol %), (CF<sub>3</sub>)<sub>2</sub>CHOH (60.0 μL, 2.0 equiv), PMHS (100.0 μL, 2.2 equiv) and DCE (0.5 mL). The reaction mixture was stirred at 60 °C for 1 h. The crude product was purified by column chromatography on silica gel (EtOAc/PE = 1/10) to afford the title compound as a colorless liquid (29.0 mg, 56% yield).

<sup>1</sup>H NMR (300 MHz, CDCl<sub>3</sub>) δ 7.95 – 7.92 (m, 2H), 7.48 – 7.45 (m, 2H), 7.21 – 7.18 (m, 4H), 3.30 (t, *J* = 7.5 Hz, 2H), 3.07 (t, *J* = 7.5 Hz, 2H), 2.38 (s, 3H).

<sup>13</sup>C NMR (75 MHz, CDCl<sub>3</sub>) δ 198.1, 139.5, 138.0, 135.8, 135.2, 129.5, 129.5, 129.3,

129.3, 128.9, 128.9, 128.3, 128.3, 40.6, 29.7, 21.1.

**HRMS** (ESI)  $m/z$ :  $[M + Na]^+$  Calculated for  $[C_{16}H_{15}O^{35}ClNa^+]$ : 281.0704, found 281.0706.

**HRMS** (ESI)  $m/z$ :  $[M + Na]^+$  Calculated for  $[C_{16}H_{15}O^{37}ClNa^+]$ : 283.0674, found 283.0677.

**IR** (neat,  $cm^{-1}$ ) 3023, 2915, 2857, 1674, 1587, 1570, 1515, 1486, 1200, 1092, 906, 806, 728.

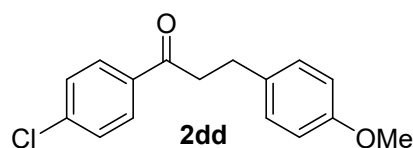

**1-(4-Chlorophenyl)-3-(4-methoxyphenyl) propan-1-one.** From **1dd** (54.5 mg, 0.20 mmol, 1.0 equiv), the title compound was prepared following the general procedure using  $FeCl_3$  (3.2 mg, 0.020 mmol, 10 mol %),  $(CF_3)_2CHOH$  (60.0  $\mu L$ , 2.0 equiv), PMHS (100.0  $\mu L$ , 2.2 equiv) and DCE (0.5 mL). The reaction mixture was stirred at 60  $^{\circ}C$  for 5 h. The crude product was purified by column chromatography on silica gel (EtOAc/PE = 1/10) to afford the title compound as a colorless liquid (31.0 mg, 57% yield).

**$^1H$  NMR** (300 MHz,  $CDCl_3$ )  $\delta$  7.93 – 7.90 (m, 2H), 7.46 – 7.43 (m, 2H), 7.21 – 7.19 (m, 2H), 6.90 – 6.87 (m, 2H), 3.82 (s, 3H), 3.27 (t,  $J = 7.5$  Hz, 2H), 3.04 (t,  $J = 7.5$  Hz, 2H).

**$^{13}C$  NMR** (75 MHz,  $CDCl_3$ )  $\delta$  198.1, 158.0, 139.5, 135.2, 133.1, 129.5, 129.5, 129.4, 129.4, 128.9, 128.9, 114.0, 114.0, 55.3, 40.7, 29.2.

**HRMS** (ESI)  $m/z$ :  $[M + H]^+$  Calculated for  $[C_{16}H_{16}O_2^{35}Cl^+]$ : 275.0833, found 275.0833.

**HRMS** (ESI)  $m/z$ :  $[M + H]^+$  Calculated for  $[C_{16}H_{16}O_2^{37}Cl^+]$ : 277.0804, found 277.0807.

**IR** (neat,  $cm^{-1}$ ) 2999, 2933, 2835, 1684, 1611, 1588, 1511, 1464, 1441, 1244, 1090, 1034, 908, 818, 729.

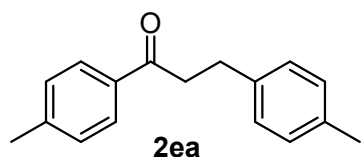

**1,3-dip-tolylpropan-1-one.** From **1ea** (47.3 mg, 0.20 mmol, 1.0 equiv), the title compound was prepared following the general procedure using FeCl<sub>3</sub> (3.2 mg, 0.020 mmol, 10 mol%), (CF<sub>3</sub>)<sub>2</sub>CHOH (60.0 μL, 2.0 equiv), PMHS (100.0 μL, 2.2 equiv) and DCE (0.5 mL). The reaction mixture was stirred at 60 °C for 2 h. The crude product was purified by column chromatography on silica gel (EtOAc/PE = 1/10) to afford the title compound as a colorless liquid (26.1 mg, 54% yield).

<sup>1</sup>H NMR (400 MHz, CDCl<sub>3</sub>) δ 7.78 – 7.76 (m, 2H), 7.16 – 7.14 (m, 2H), 7.06 – 7.04 (m, 2H), 7.02 – 7.00 (m, 2H), 3.16 (t, *J* = 8.0 Hz, 2H), 2.93 (t, *J* = 8.0 Hz, 2H), 2.31 (s, 3H), 2.23 (s, 3H).

<sup>13</sup>C NMR (75 MHz, CDCl<sub>3</sub>) δ 199.0, 143.8, 138.4, 135.6, 134.5, 129.3, 129.3, 129.3, 129.3, 128.4, 128.4, 128.2, 128.2, 40.6, 29.9, 21.7, 21.1.

HRMS (ESI) *m/z*: [M + H]<sup>+</sup> Calculated for [C<sub>17</sub>H<sub>19</sub>O<sup>+</sup>]: 239.1430, found 239.1431.

IR (neat, cm<sup>-1</sup>) 3022, 2916, 2861, 1678, 1605, 1572, 1514, 1447, 1179, 976, 908, 799, 730.

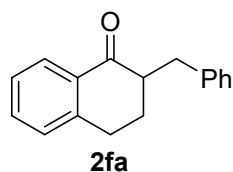

**2-benzyl-3,4-dihydronaphthalen-1(2H)-one.**

From **1fa** (46.8 mg, 0.20 mmol, 1.0 equiv), the title compound was prepared following the general procedure using FeCl<sub>3</sub> (3.2 mg, 0.020 mmol, 10 mol %), (CF<sub>3</sub>)<sub>2</sub>CHOH (60.0 μL, 2.0 equiv), PMHS (100.0 μL, 2.2 equiv) and DCE (0.5 mL). The reaction mixture was stirred at 60 °C for 4 h. The crude product was purified by column chromatography on silica gel (EtOAc/PE = 1/10) to afford the title compound as a colorless liquid (28.1 mg, 60% yield).

<sup>1</sup>H NMR (300 MHz, CDCl<sub>3</sub>) δ 8.15 – 8.10 (m, 1H), 7.54 – 7.49 (m, 1H), 7.39 – 7.35 (m, 3H), 7.30 – 7.26 (m, 4H), 3.59 – 3.53 (m, 1H), 2.98 – 2.95 (m, 2H), 2.84 – 2.67 (m, 2H), 2.19 – 2.12 (m, 1H), 1.87 – 1.77 (m, 1H).

$^{13}\text{C}$  NMR (75 MHz,  $\text{CDCl}_3$ )  $\delta$  199.4, 144.1, 140.1, 133.3, 132.5, 129.3, 129.3, 128.8, 128.5, 128.5, 127.6, 126.7, 126.2, 49.5, 35.7, 28.7, 27.7.

HRMS (ESI)  $m/z$ :  $[\text{M} + \text{H}]^+$  Calculated for  $[\text{C}_{17}\text{H}_{17}\text{O}^+]$ : 237.1274, found 237.1275.

IR (neat,  $\text{cm}^{-1}$ ) 3062, 2927, 2861, 1679, 1599, 1495, 1453, 1291, 1219, 1156, 1029, 933, 739, 700.

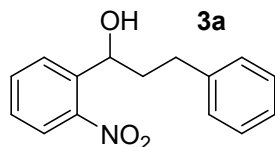

### 1-(2-nitrophenyl)-3-phenylpropan-1-ol.

$^1\text{H}$  NMR (300 MHz,  $\text{CDCl}_3$ )  $\delta$  7.94 – 7.91 (m, 1H), 7.85 – 7.83 (m, 1H), 7.67 – 7.62 (m, 1H), 7.45 – 7.40 (m, 1H), 7.36 – 7.31 (m, 2H), 7.27 – 7.24 (m, 3H), 5.28 (dd,  $J = 6.0, 7.5$  Hz, 1H), 3.01 – 2.91 (m, 2H), 2.87 – 2.77 (m, 1H), 2.20 – 2.02 (m, 2H).

$^{13}\text{C}$  NMR (75 MHz,  $\text{CDCl}_3$ )  $\delta$  147.7, 141.5, 140.2, 133.6, 128.5, 128.5, 128.5, 128.5, 128.2, 128.1, 126.1, 124.4, 69.0, 39.8, 32.6.

HRMS (ESI)  $m/z$ :  $[\text{M} + \text{H}]^+$  Calculated for  $[\text{C}_{15}\text{H}_{16}\text{NO}_3^+]$ : 258.1125, found 258.1125.

IR (neat,  $\text{cm}^{-1}$ ) 3552, 3424, 3027, 2924, 2859, 1607, 1578, 1520, 1453, 1342, 1190, 1057, 909, 857, 787, 737, 698.

## VIII. Spectroscopic Data (NMR and IR Spectrum)

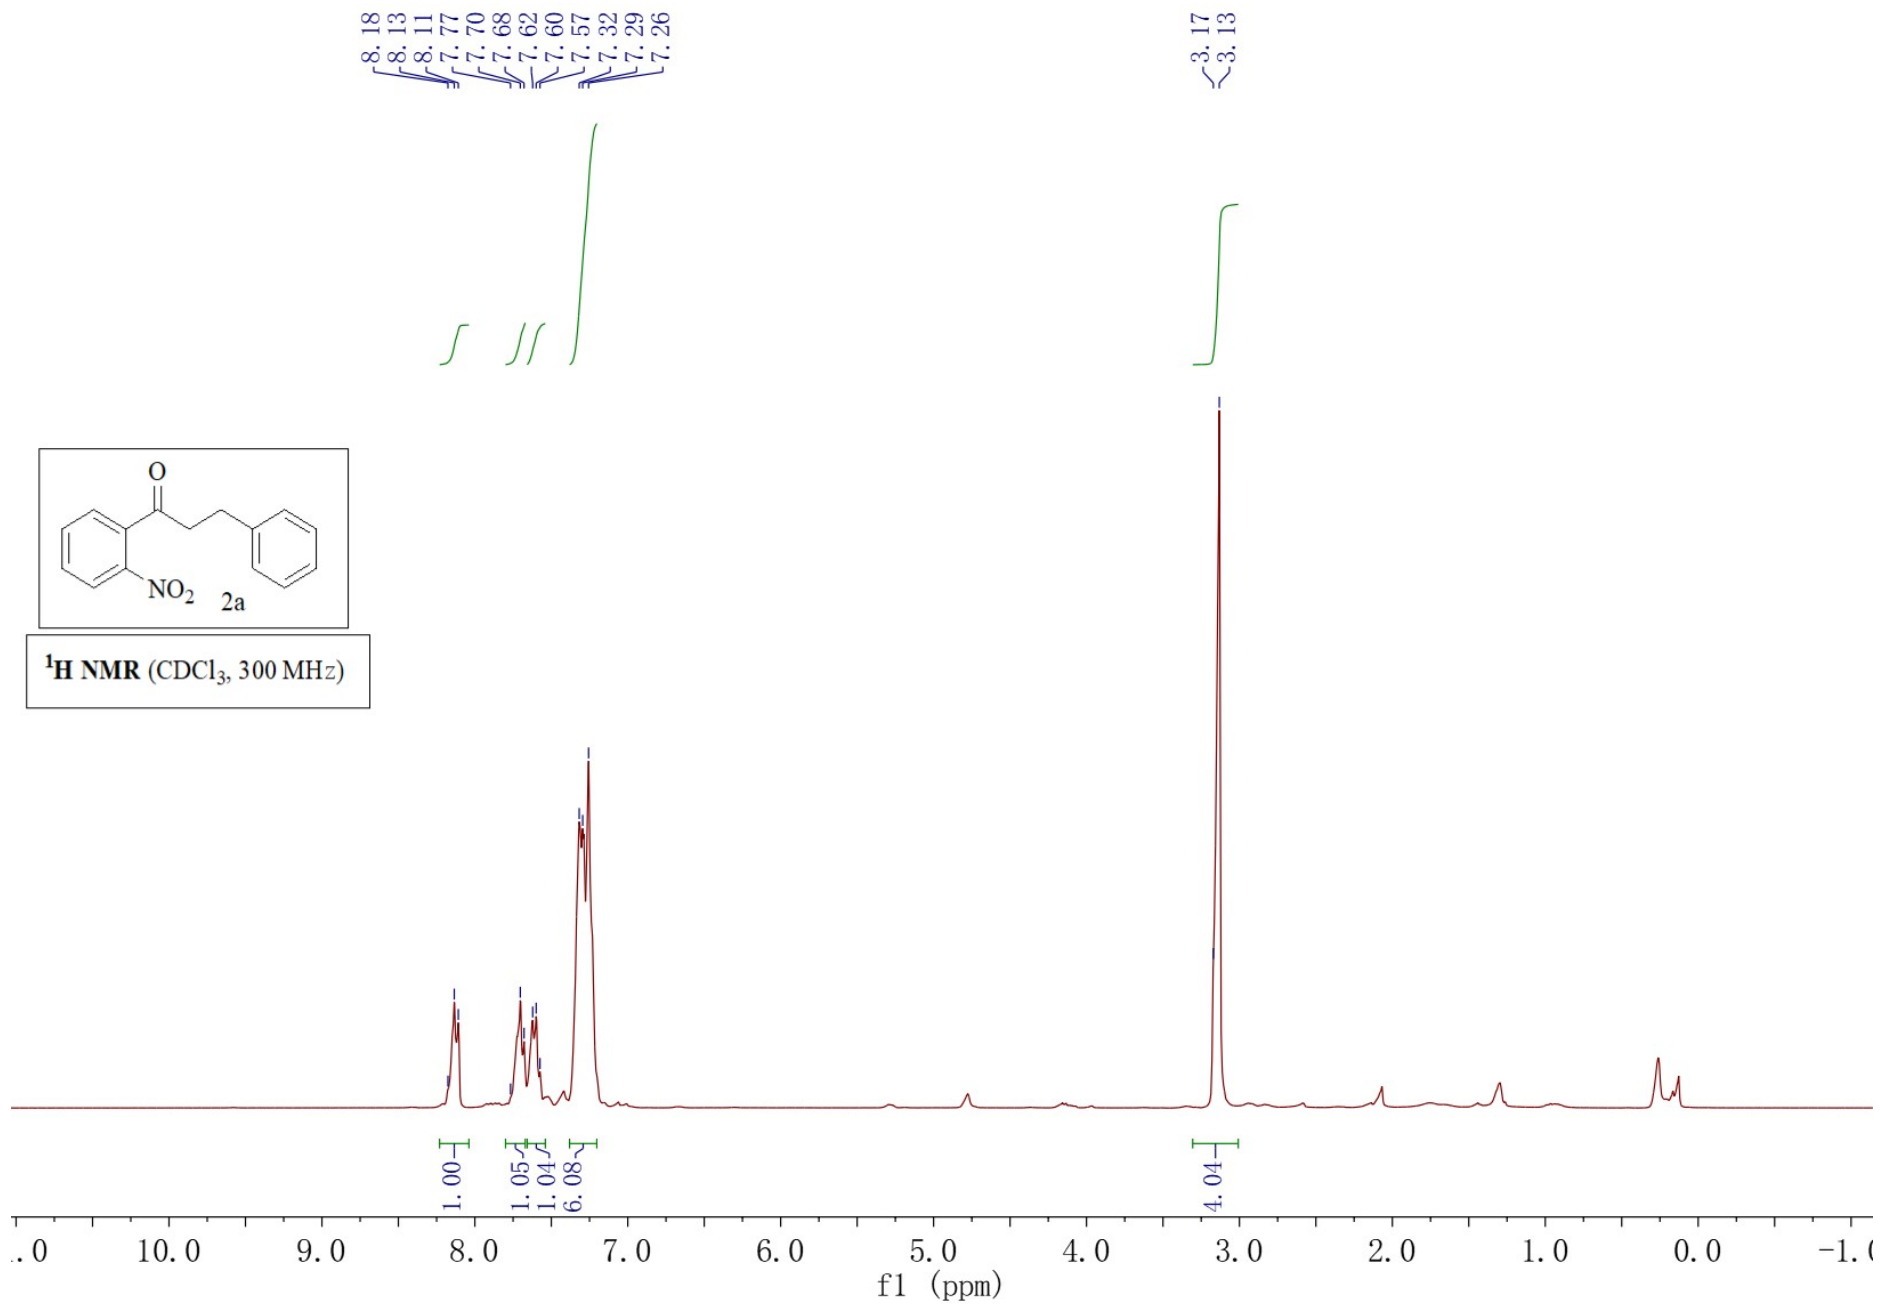

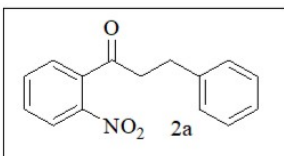

$^{13}\text{C}\{^1\text{H}\}$  NMR ( $\text{CDCl}_3$ , 75 MHz)

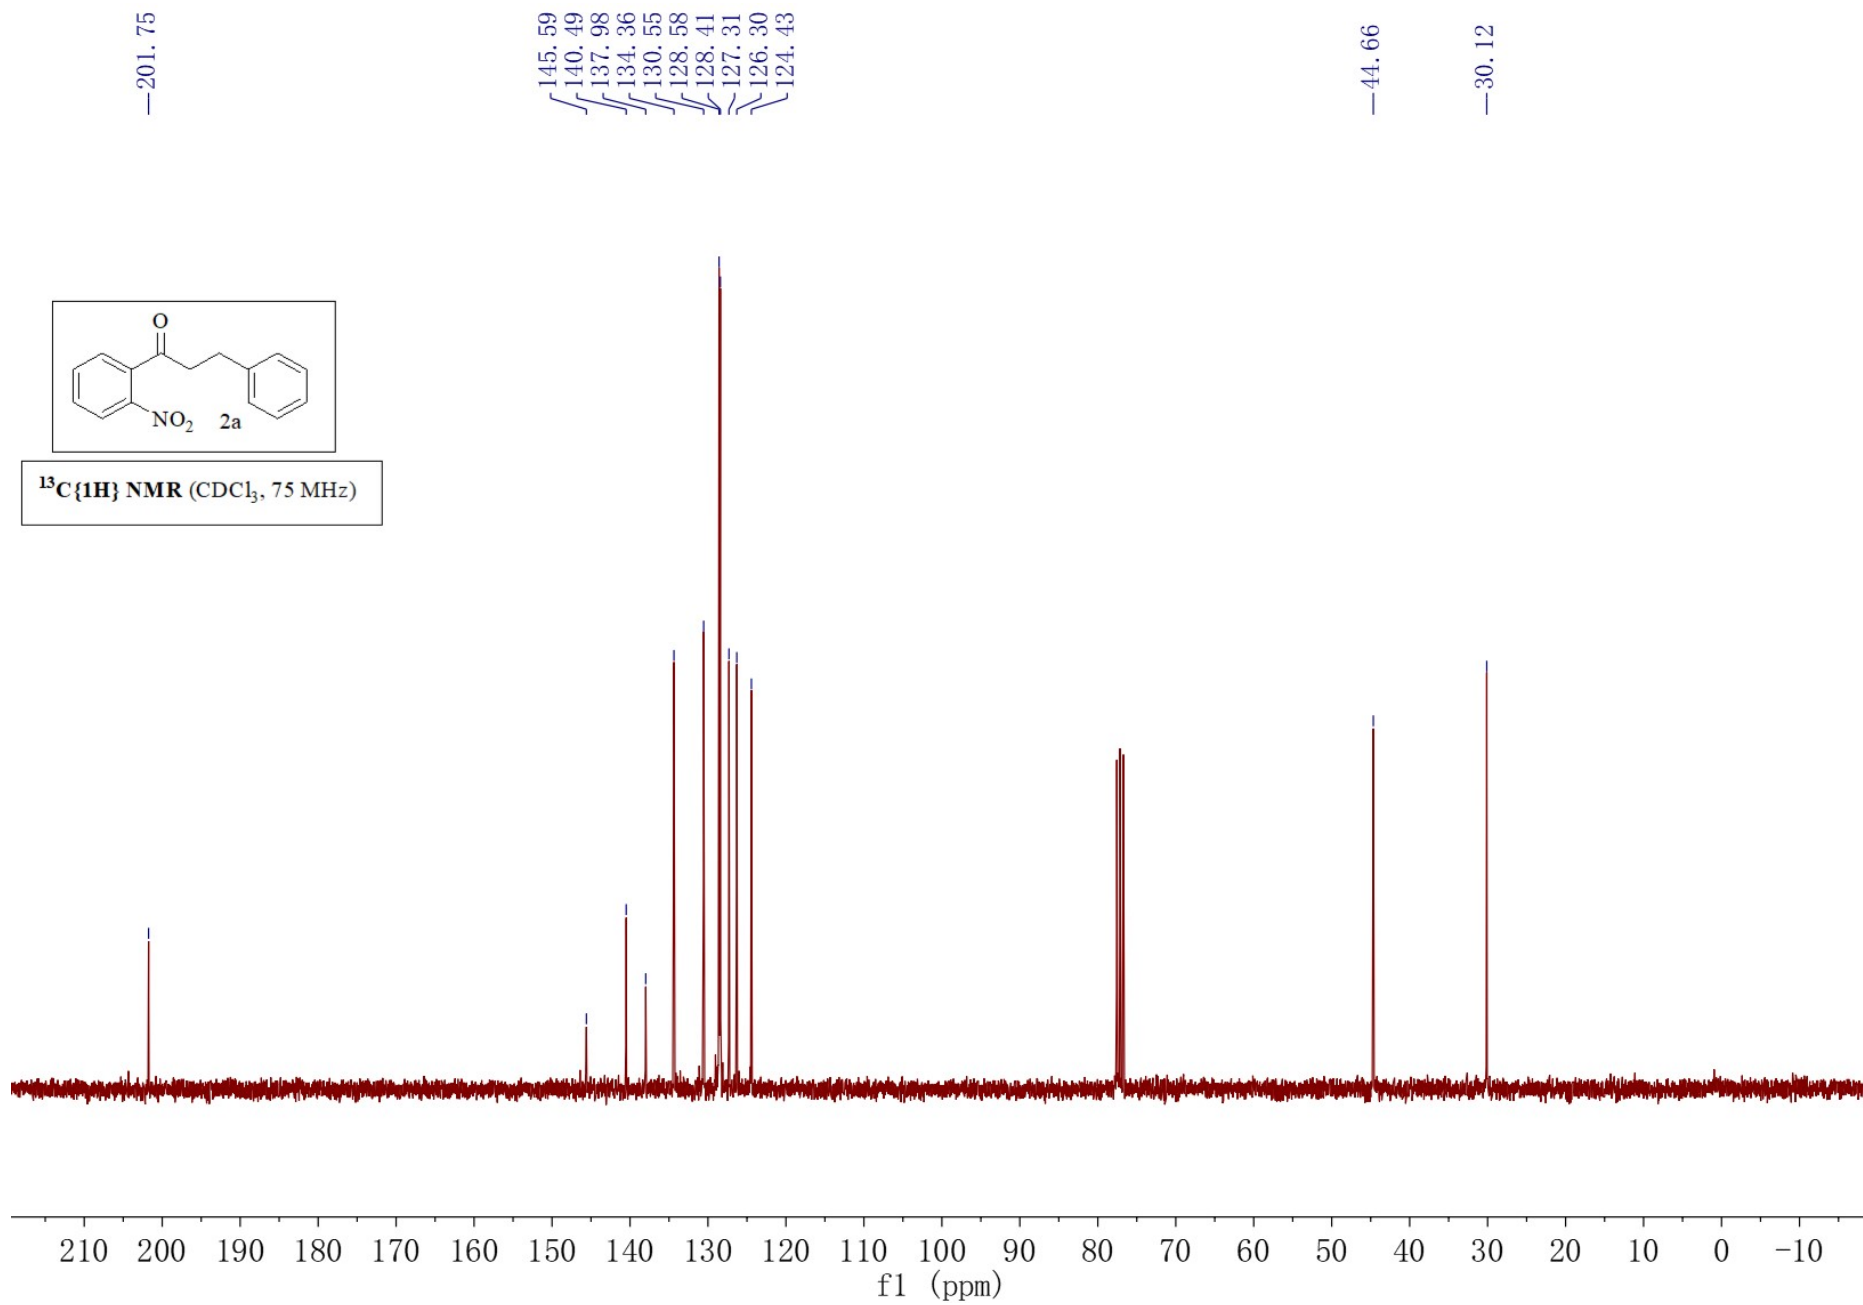

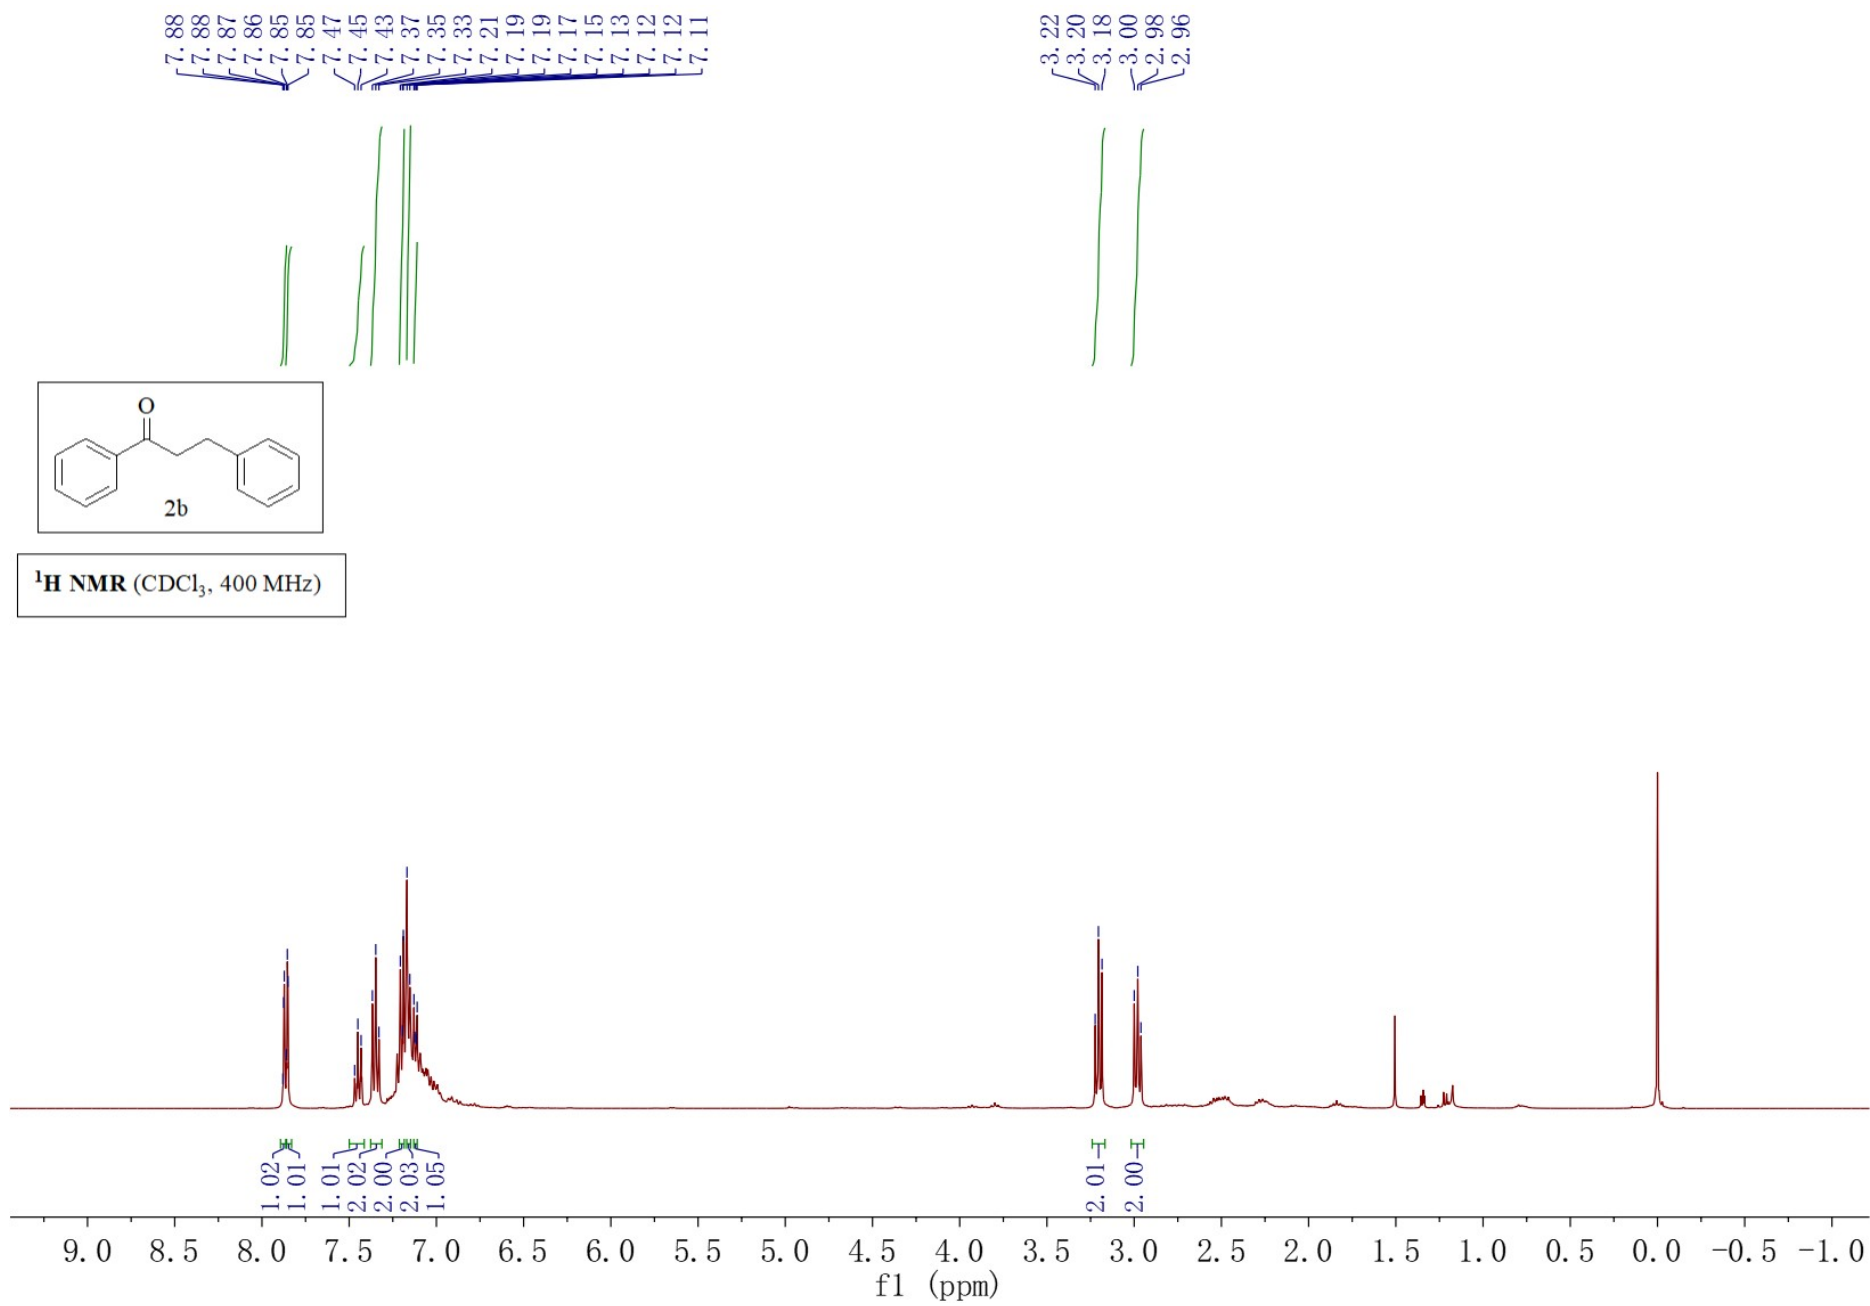



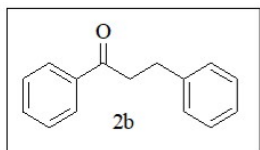

$^{13}\text{C}\{^1\text{H}\}$  NMR ( $\text{CDCl}_3$ , 75 MHz)

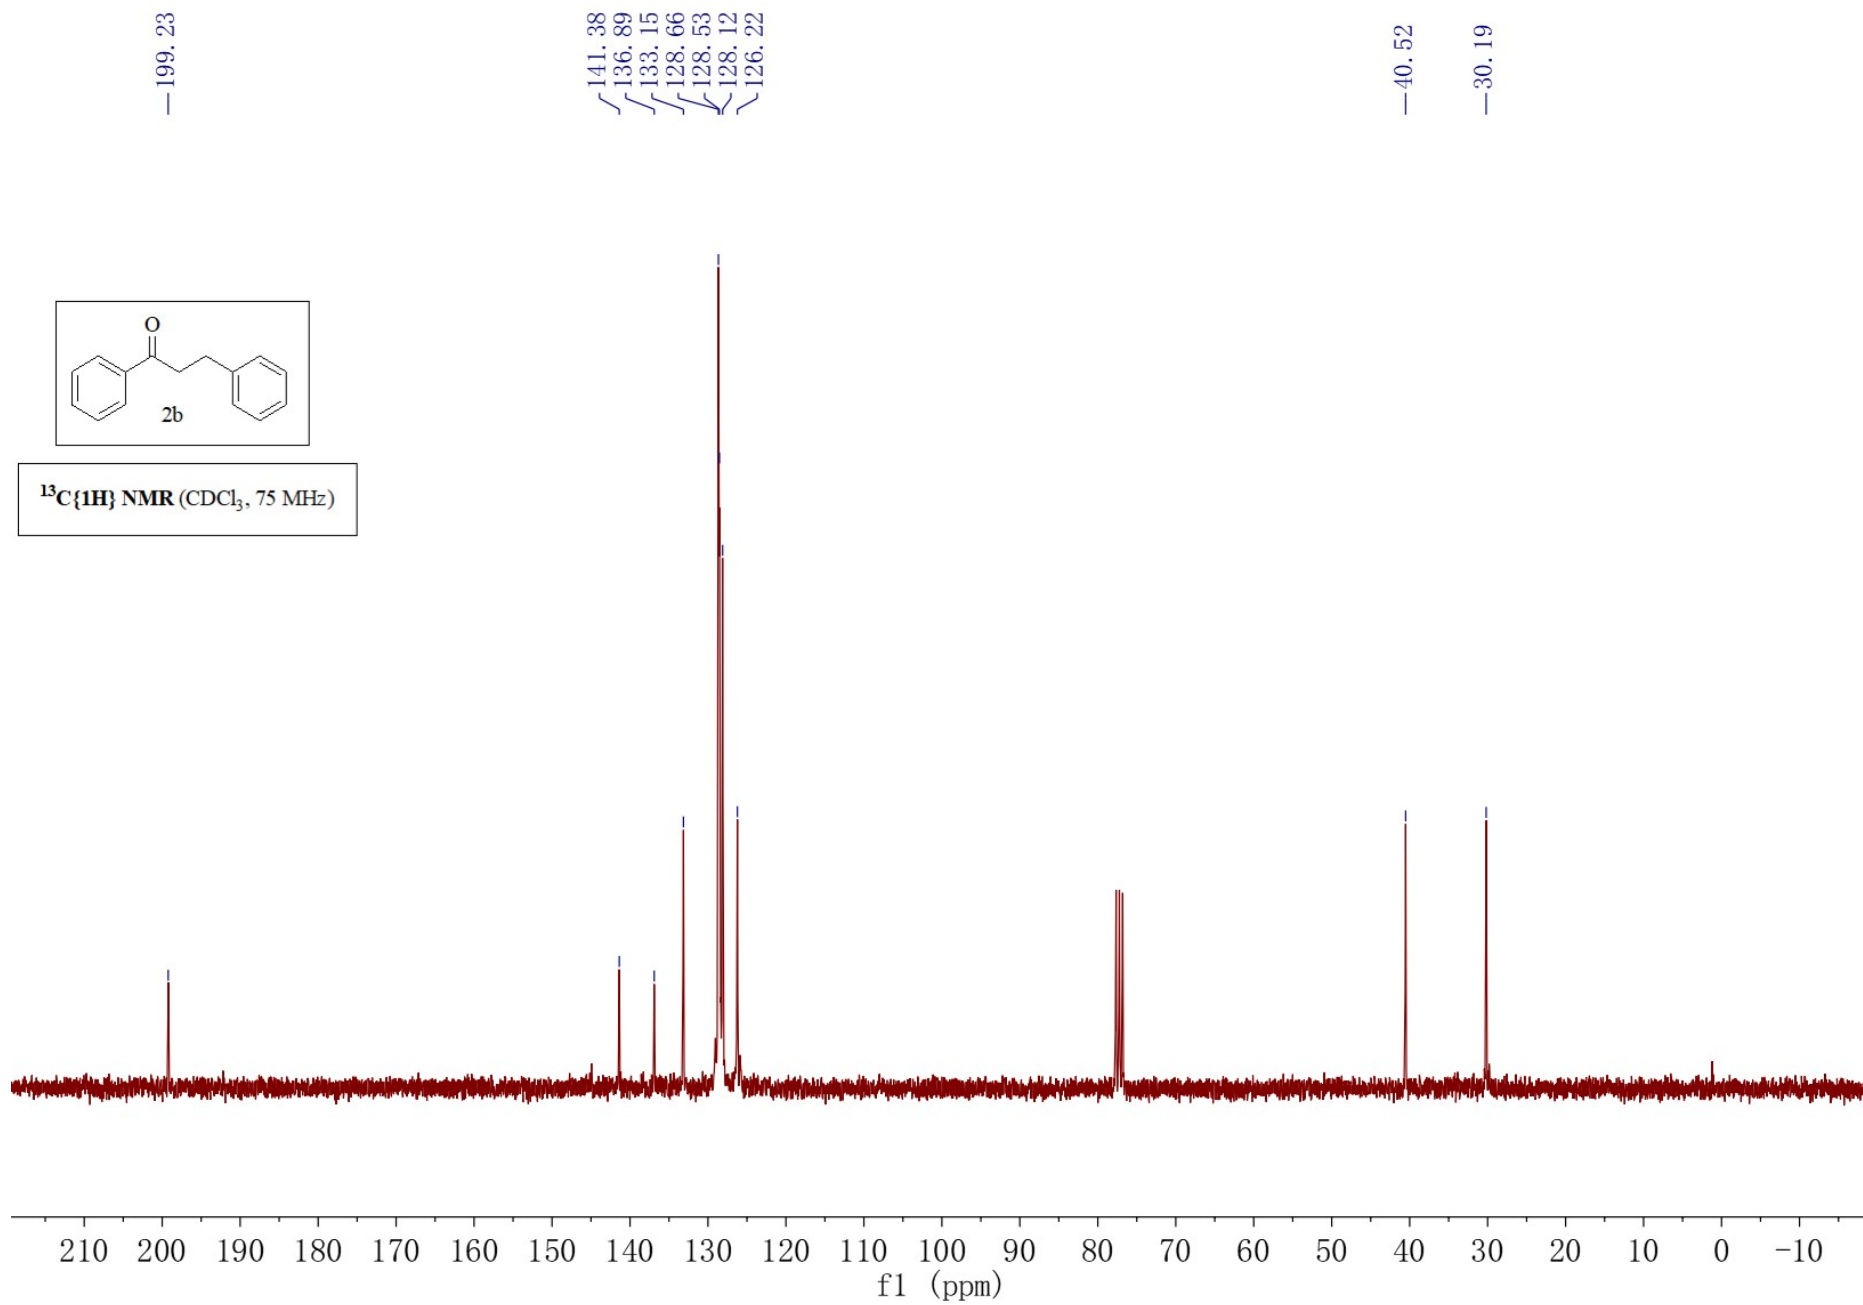

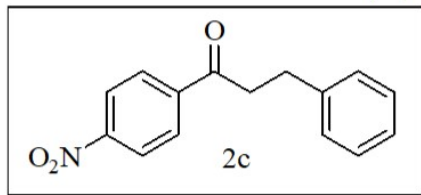

$^1\text{H NMR}$  ( $\text{CDCl}_3$ , 300 MHz)

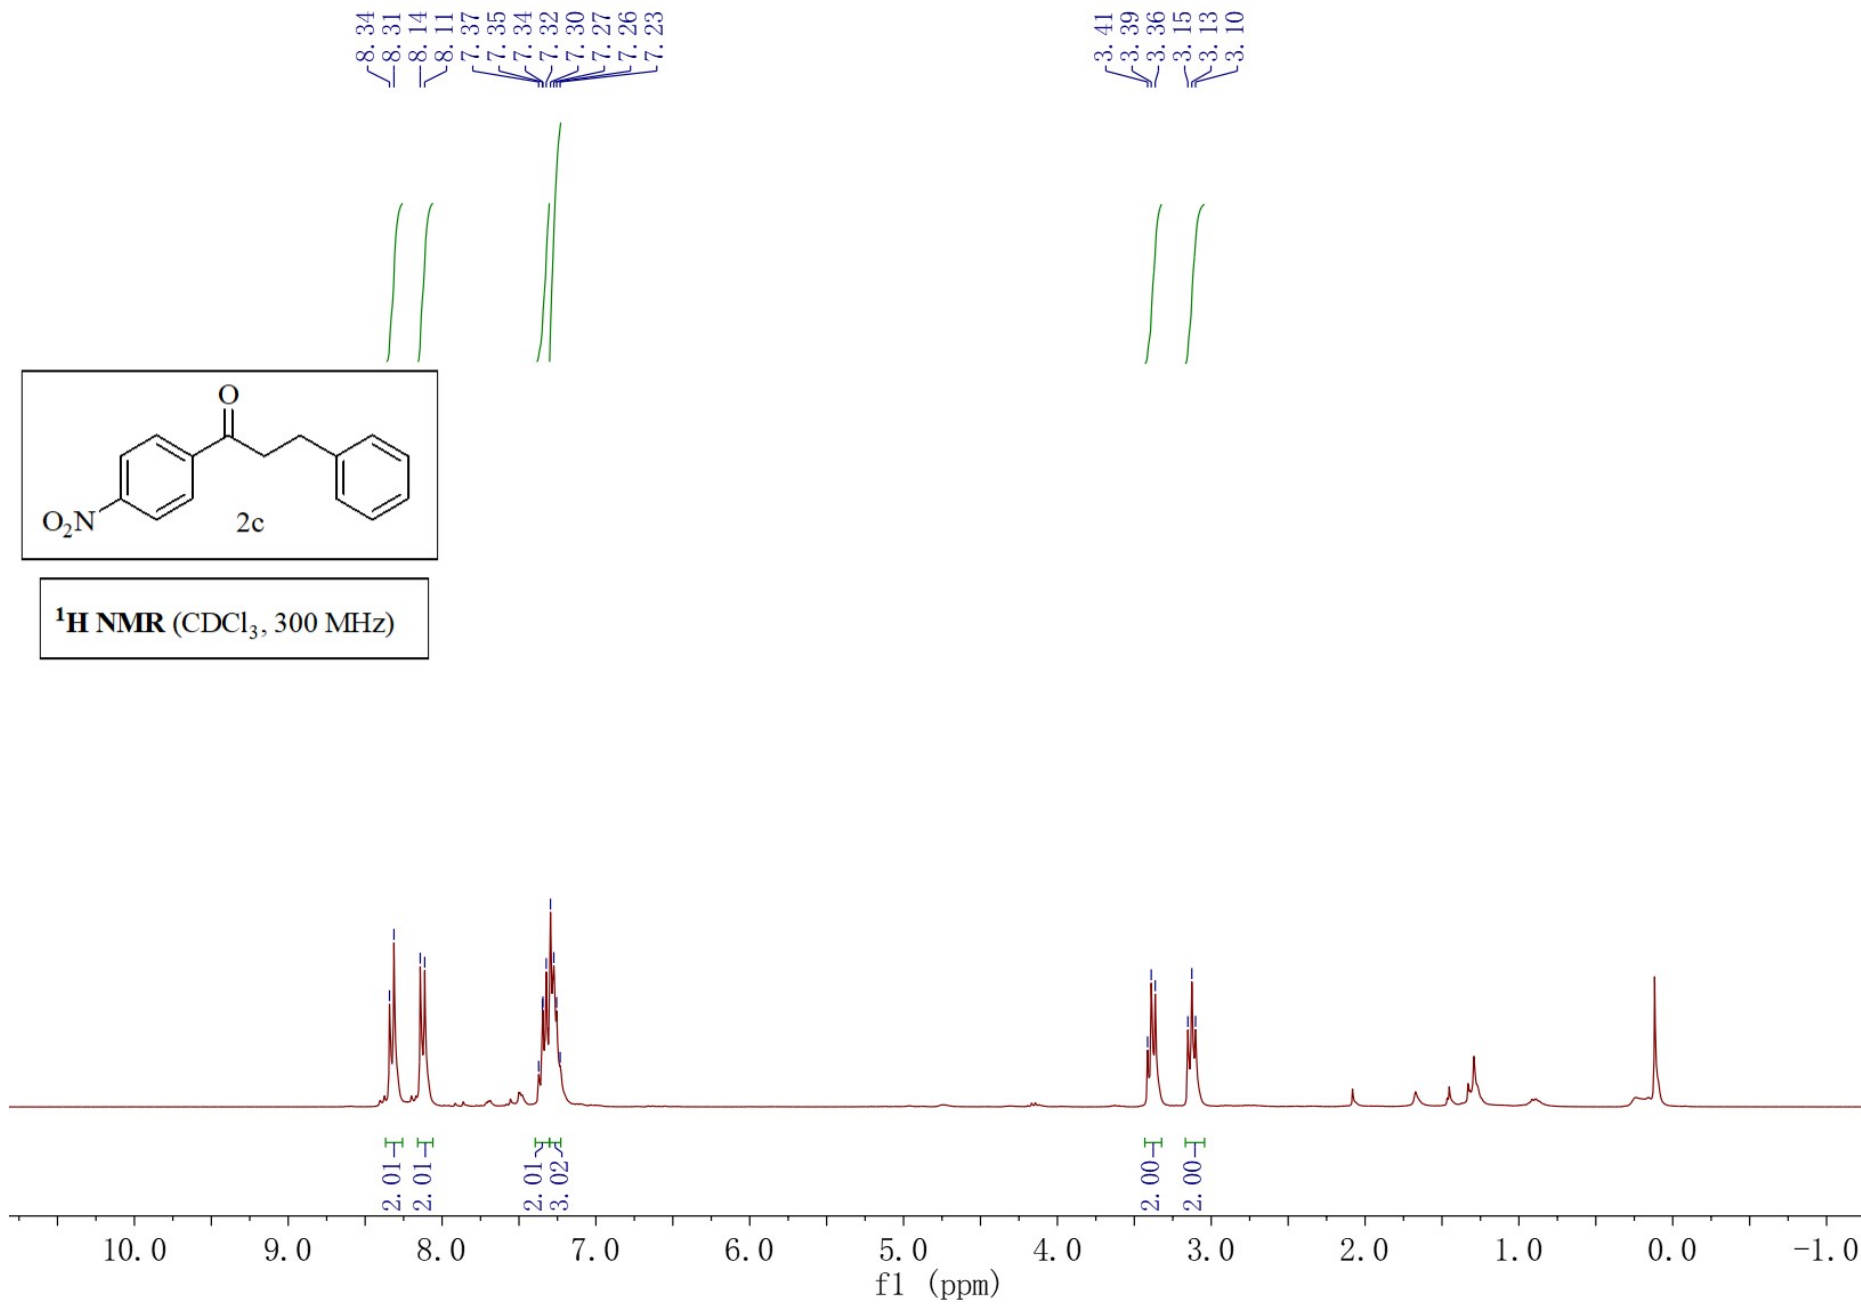

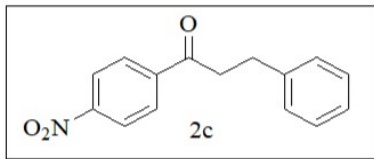

$^{13}\text{C}\{^1\text{H}\}$  NMR ( $\text{CDCl}_3$ , 75 MHz)

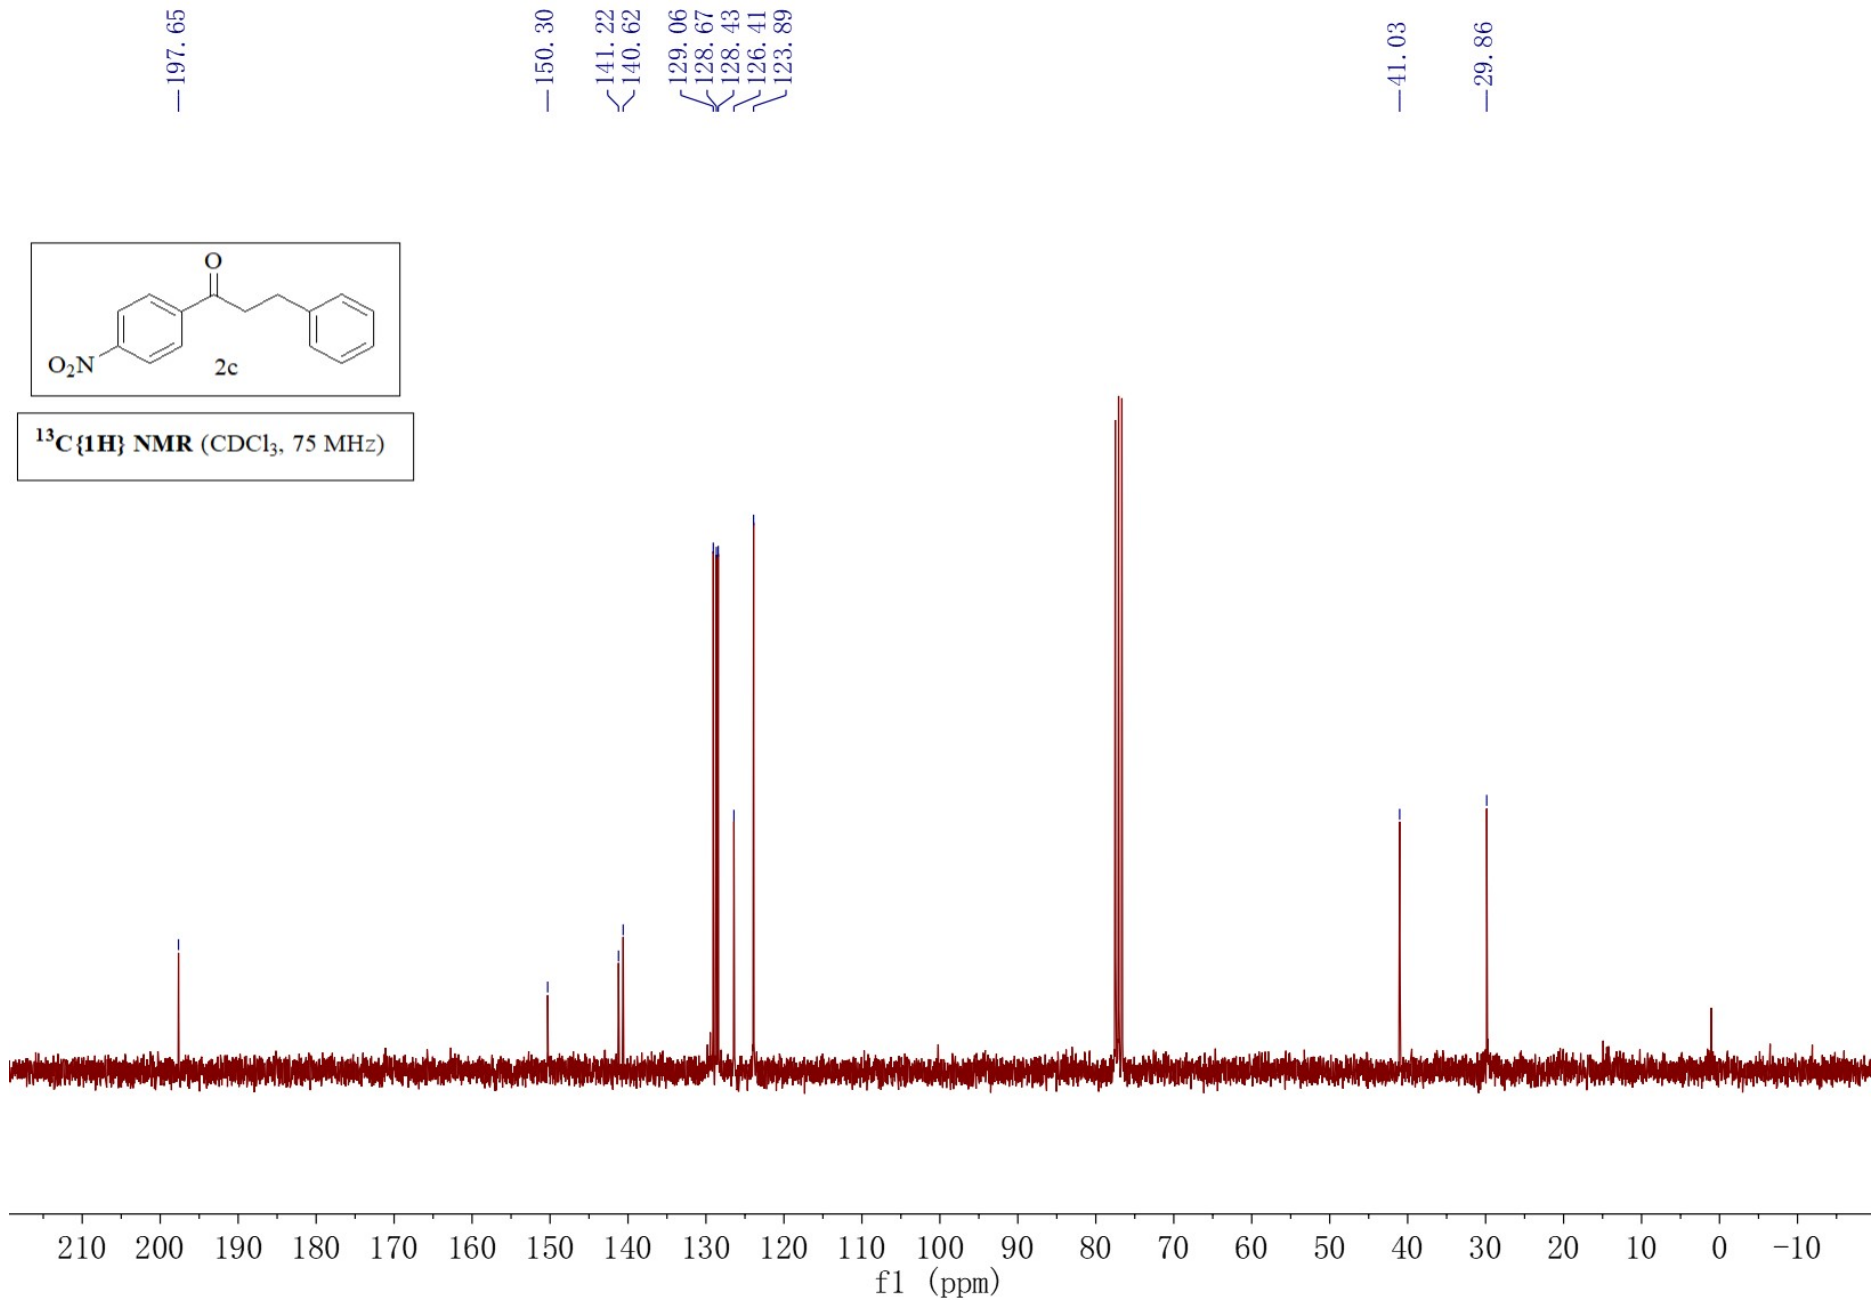

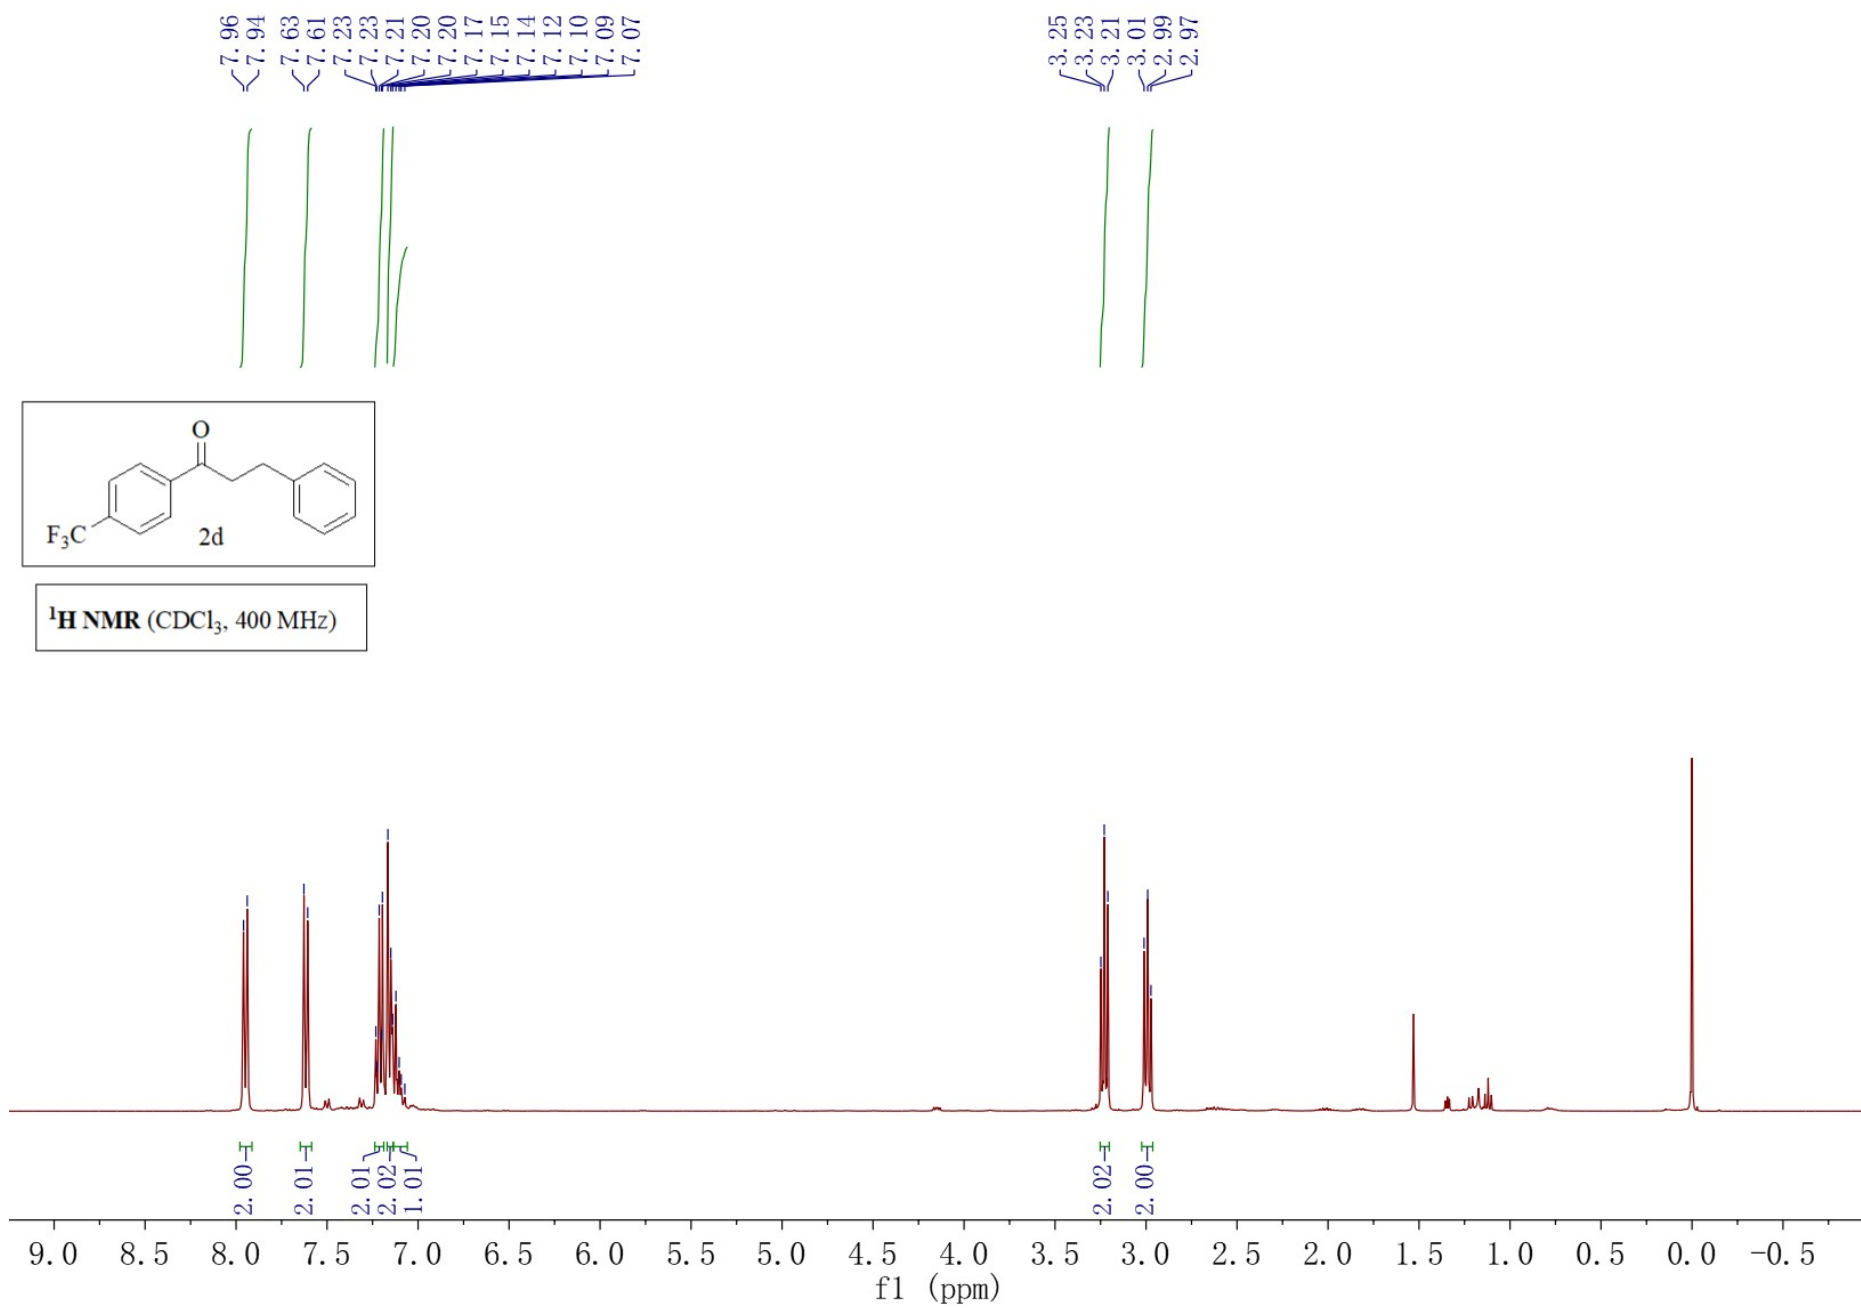

20240523-2-1.fid

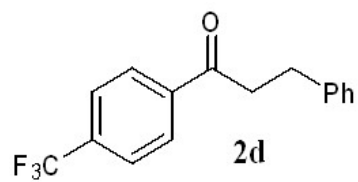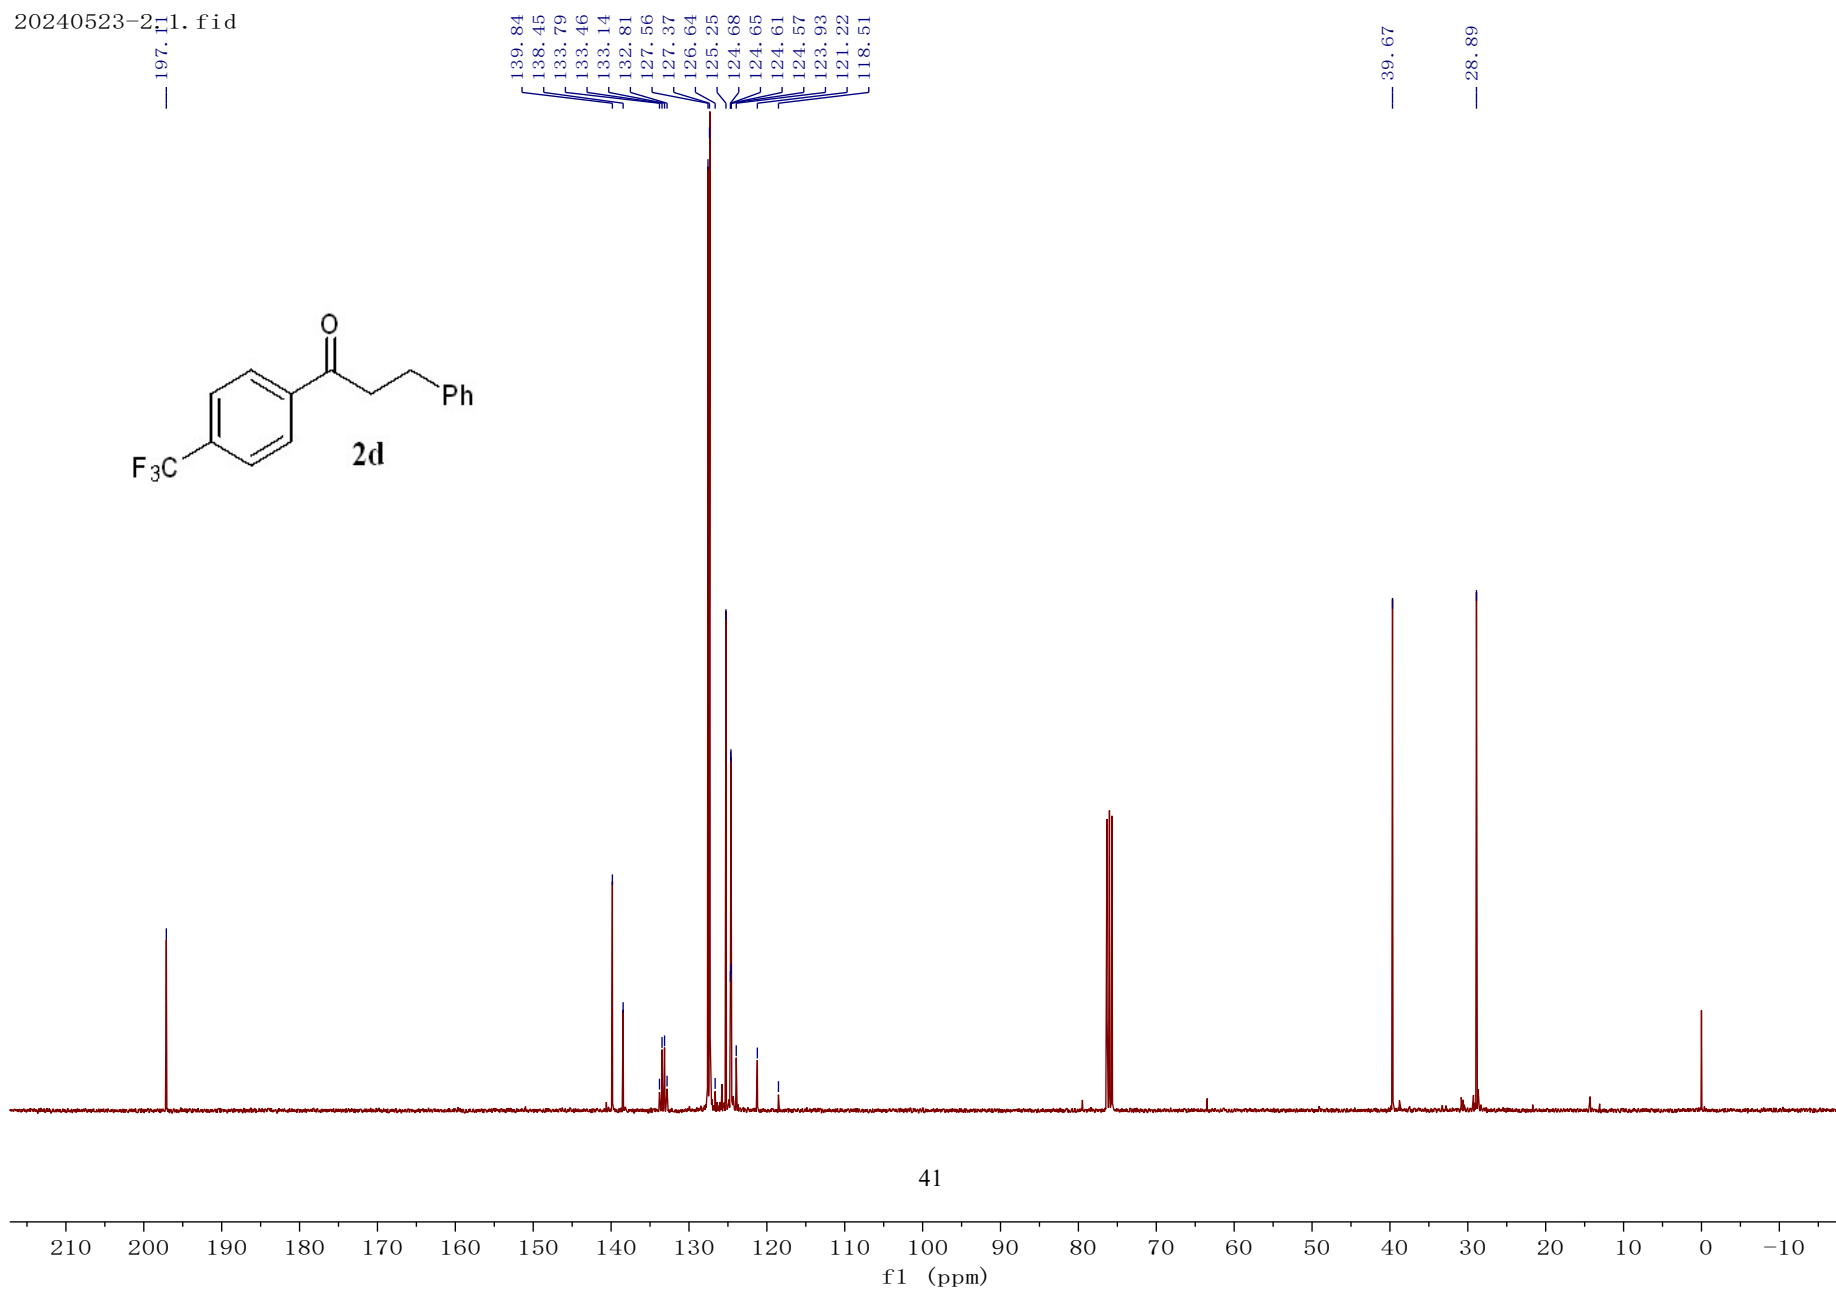

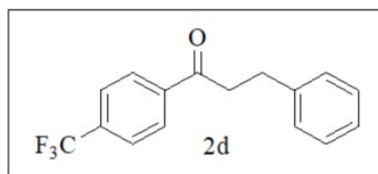

**<sup>19</sup>F NMR (CDCl<sub>3</sub>, 282 MHz)**

— -63.06

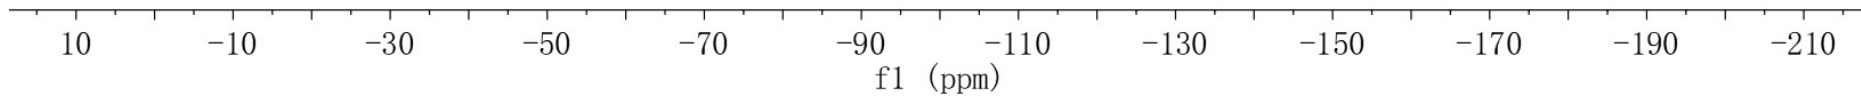

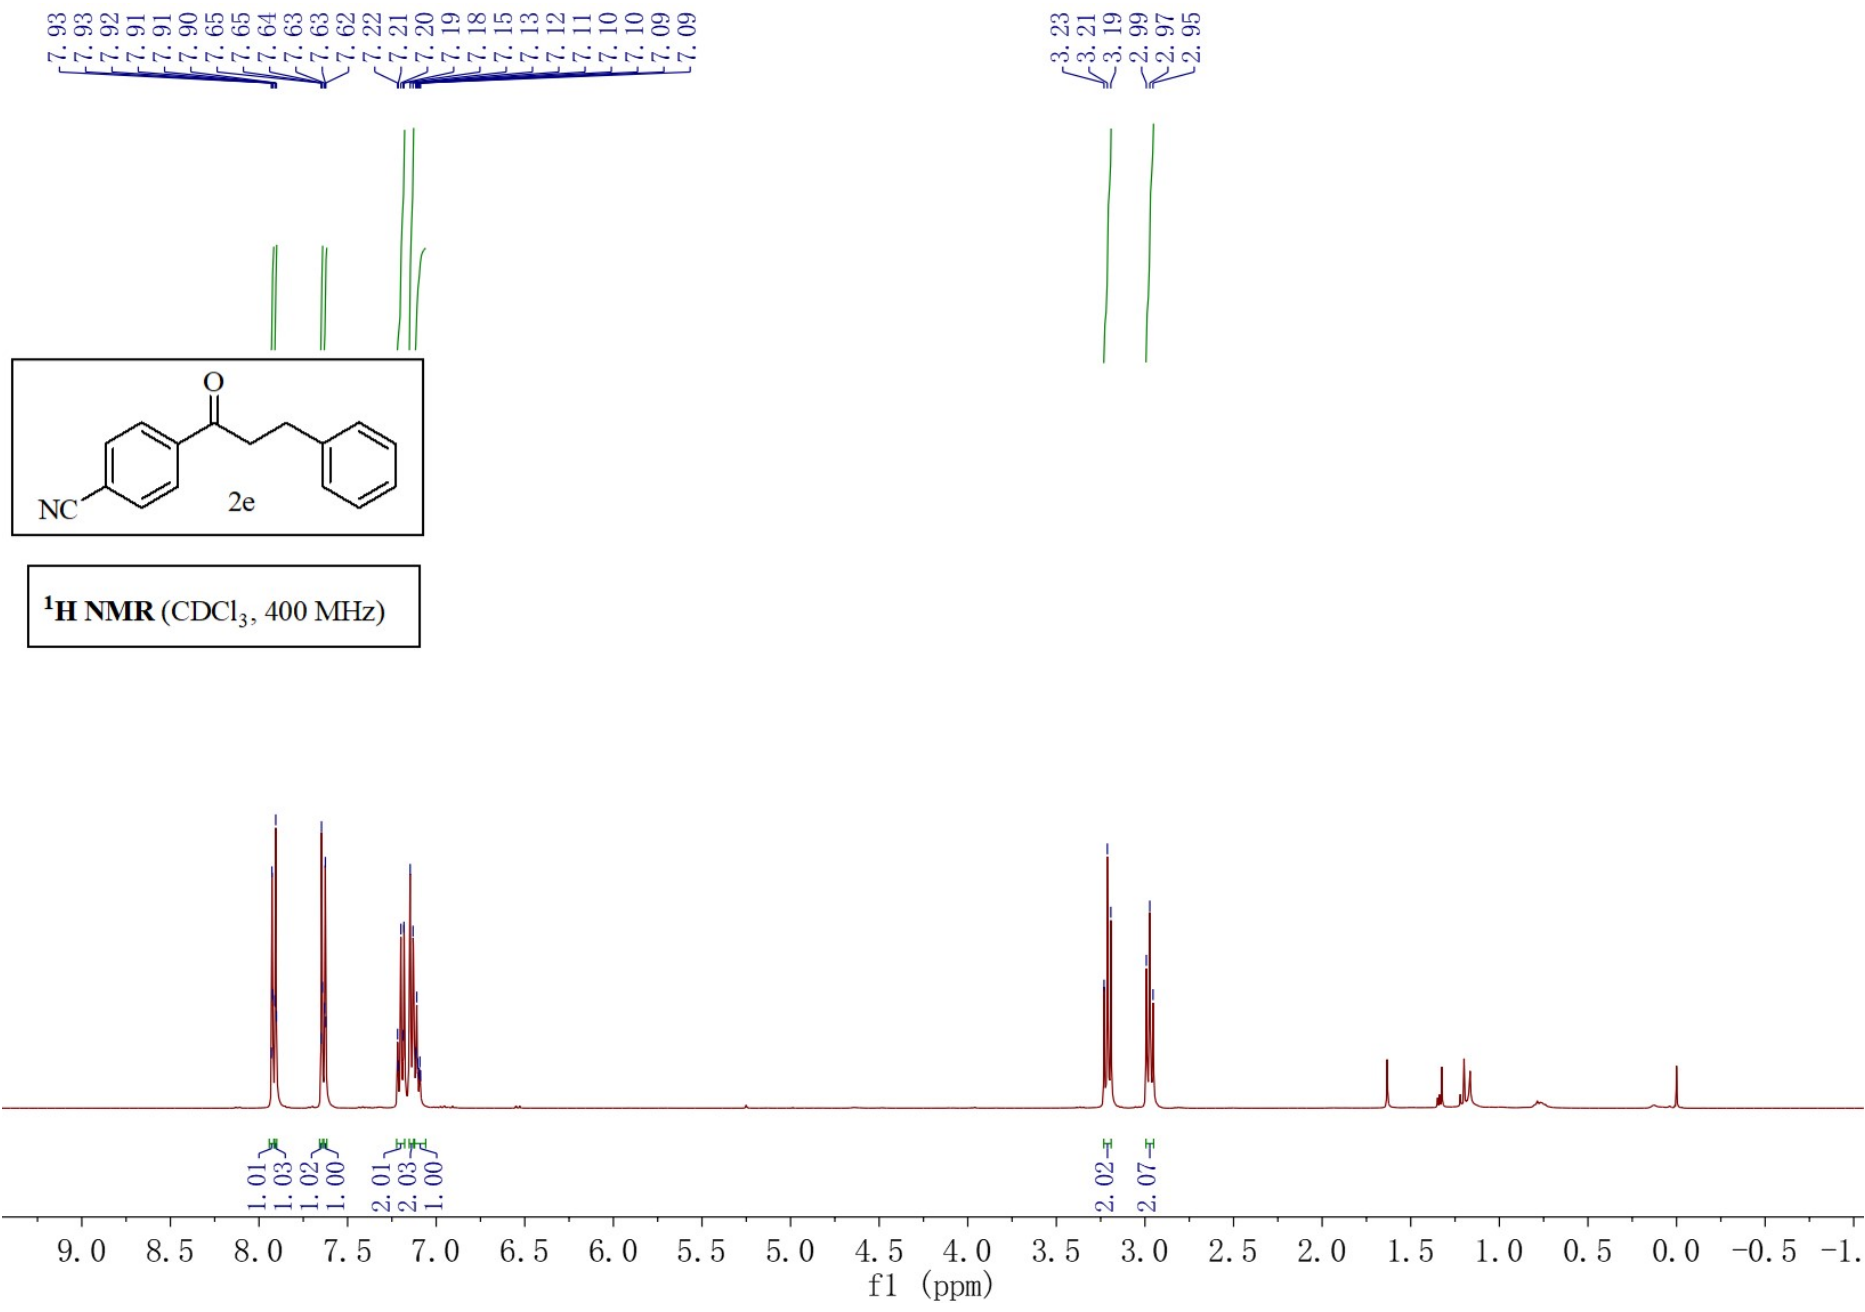

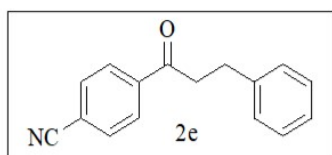

$^{13}\text{C}\{^1\text{H}\}$  NMR ( $\text{CDCl}_3$ , 75 MHz)

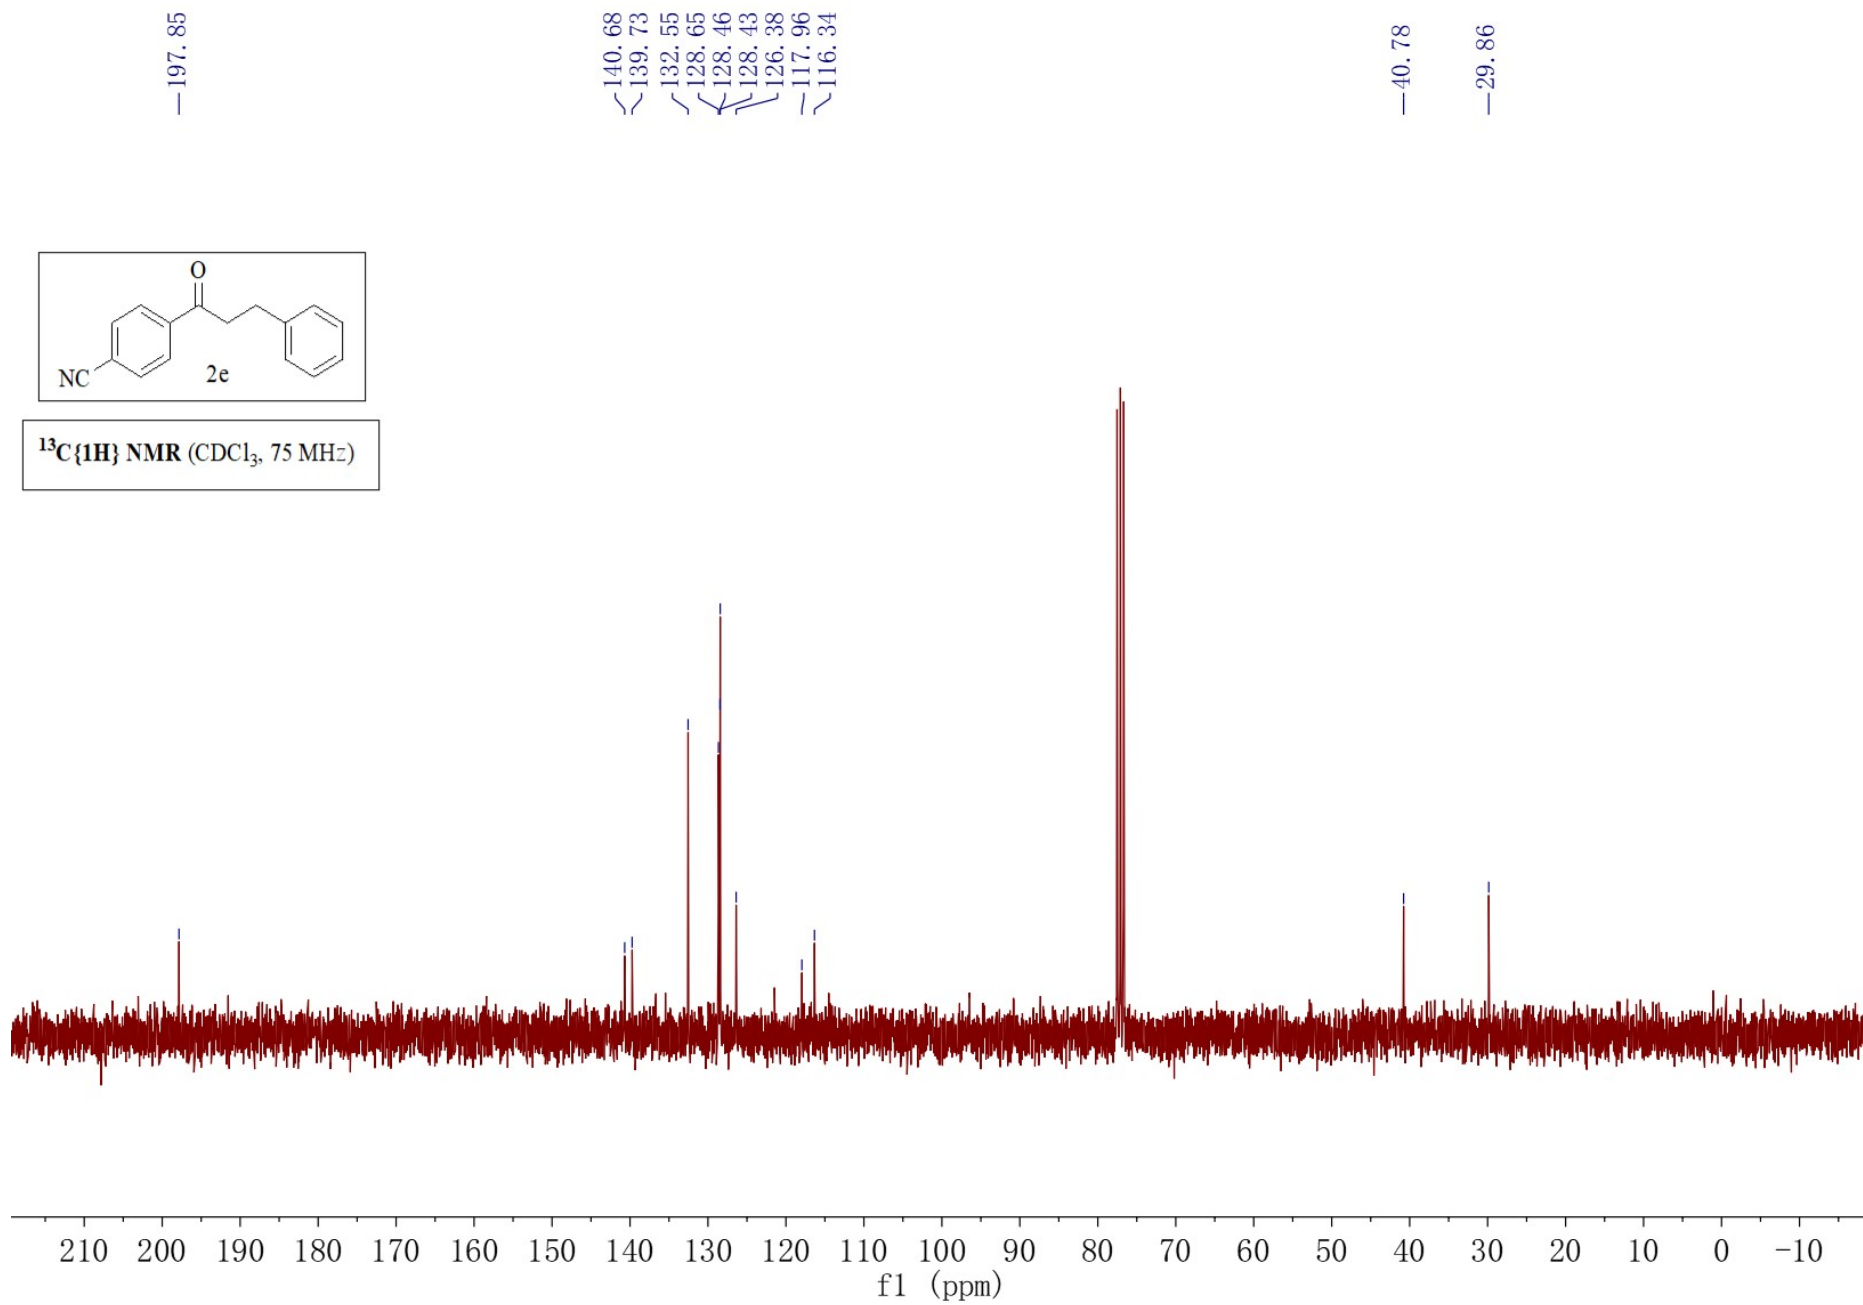



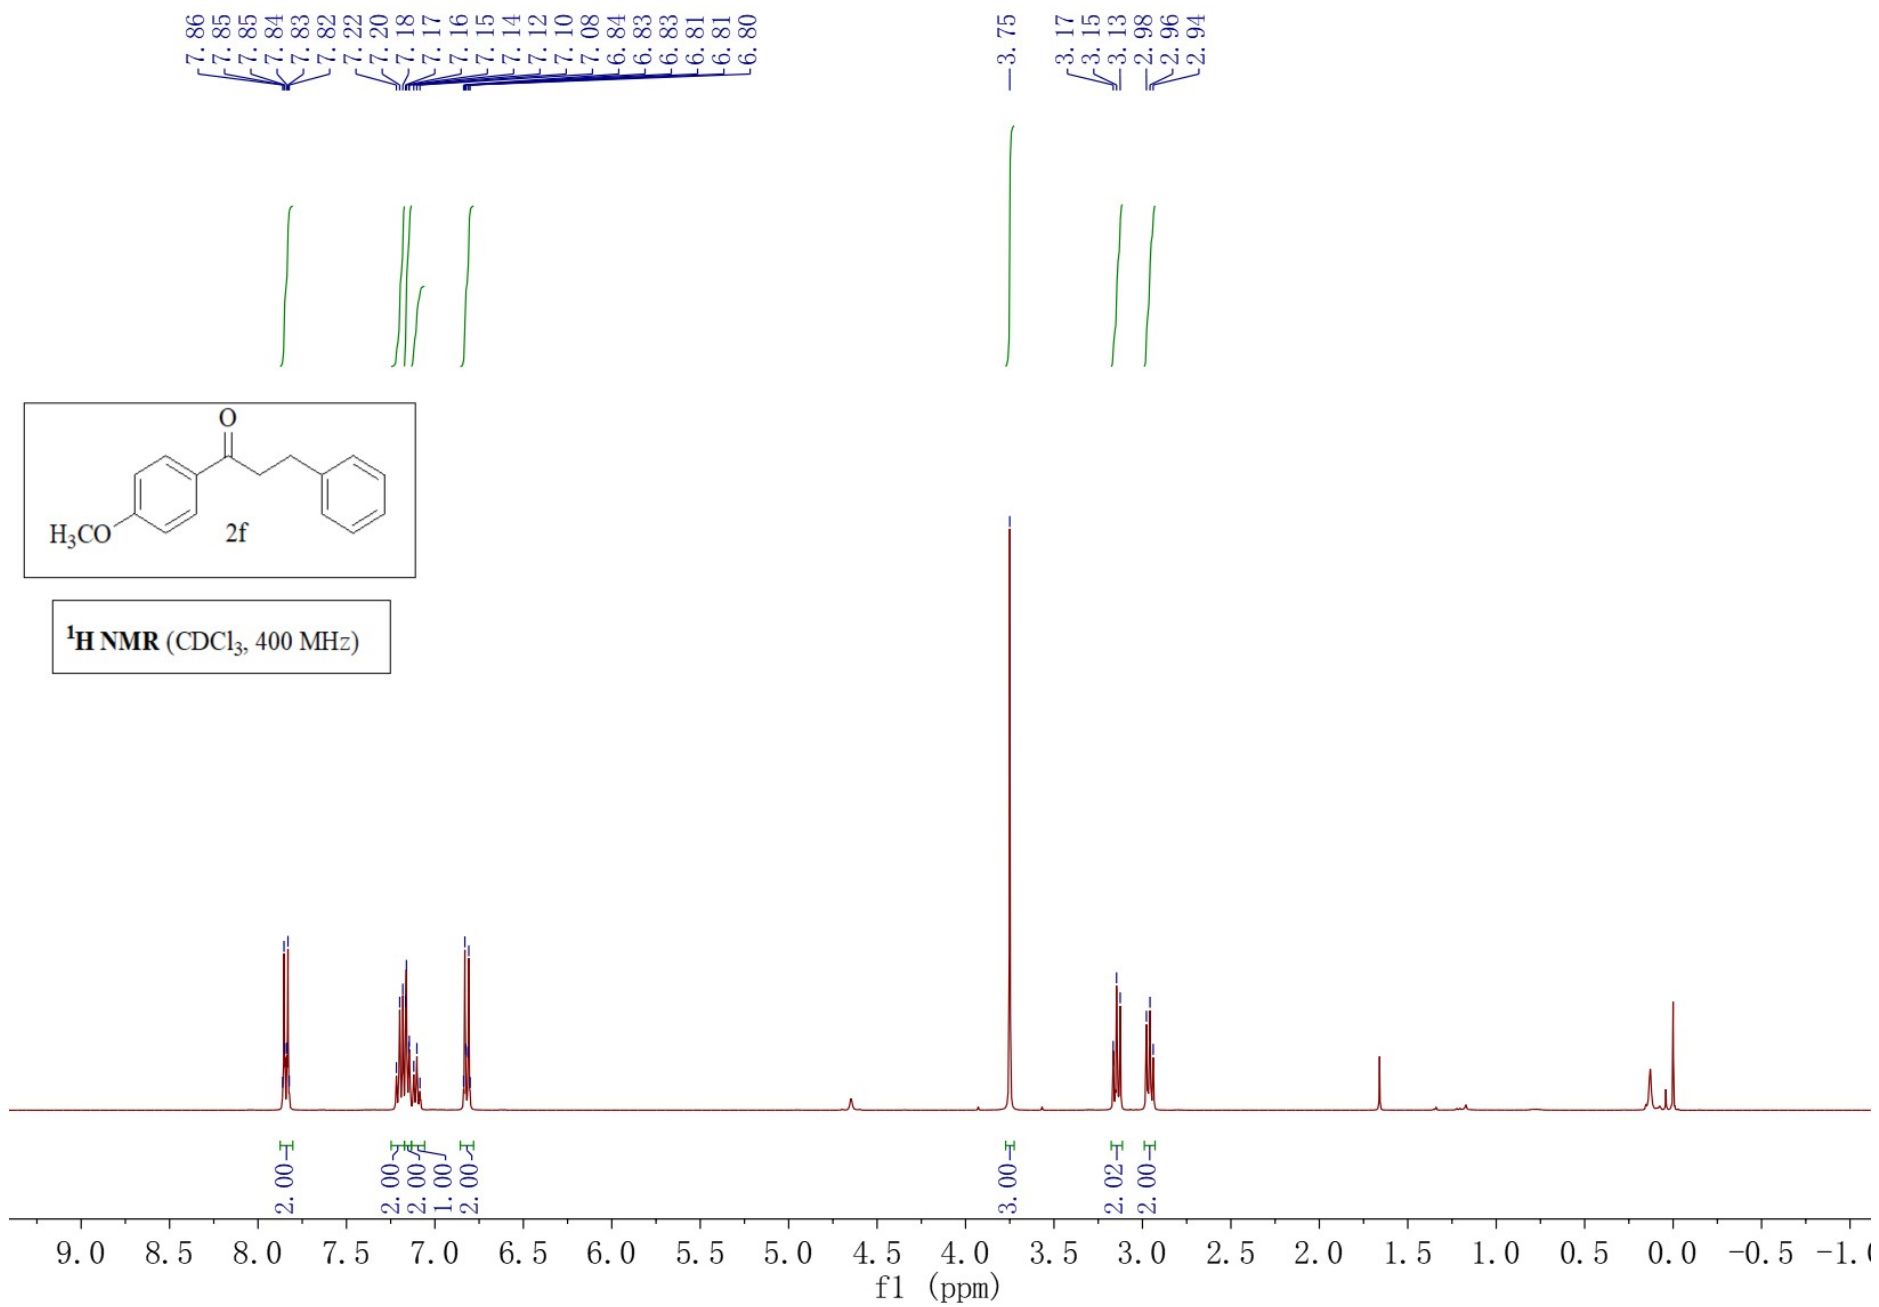

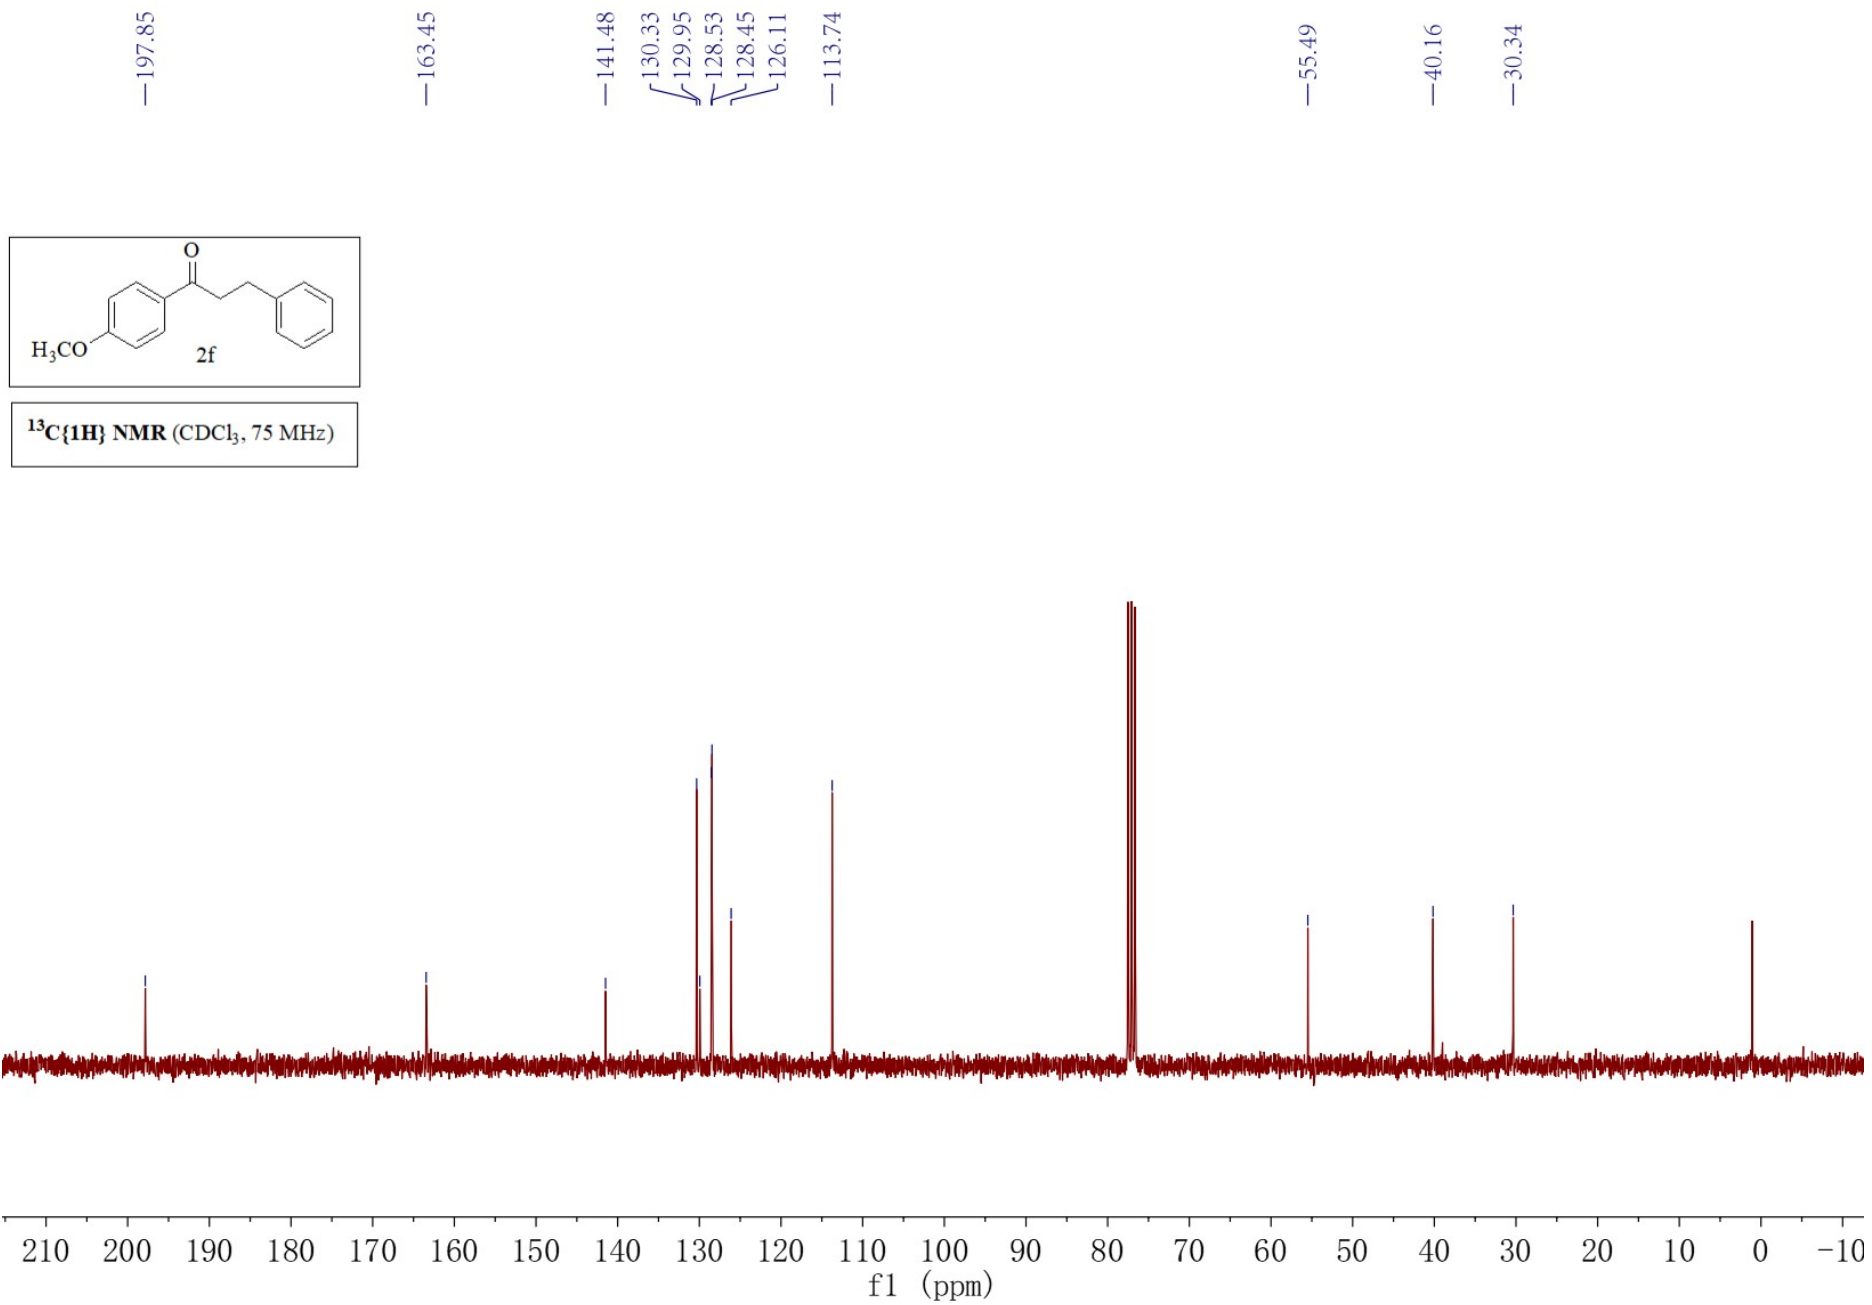

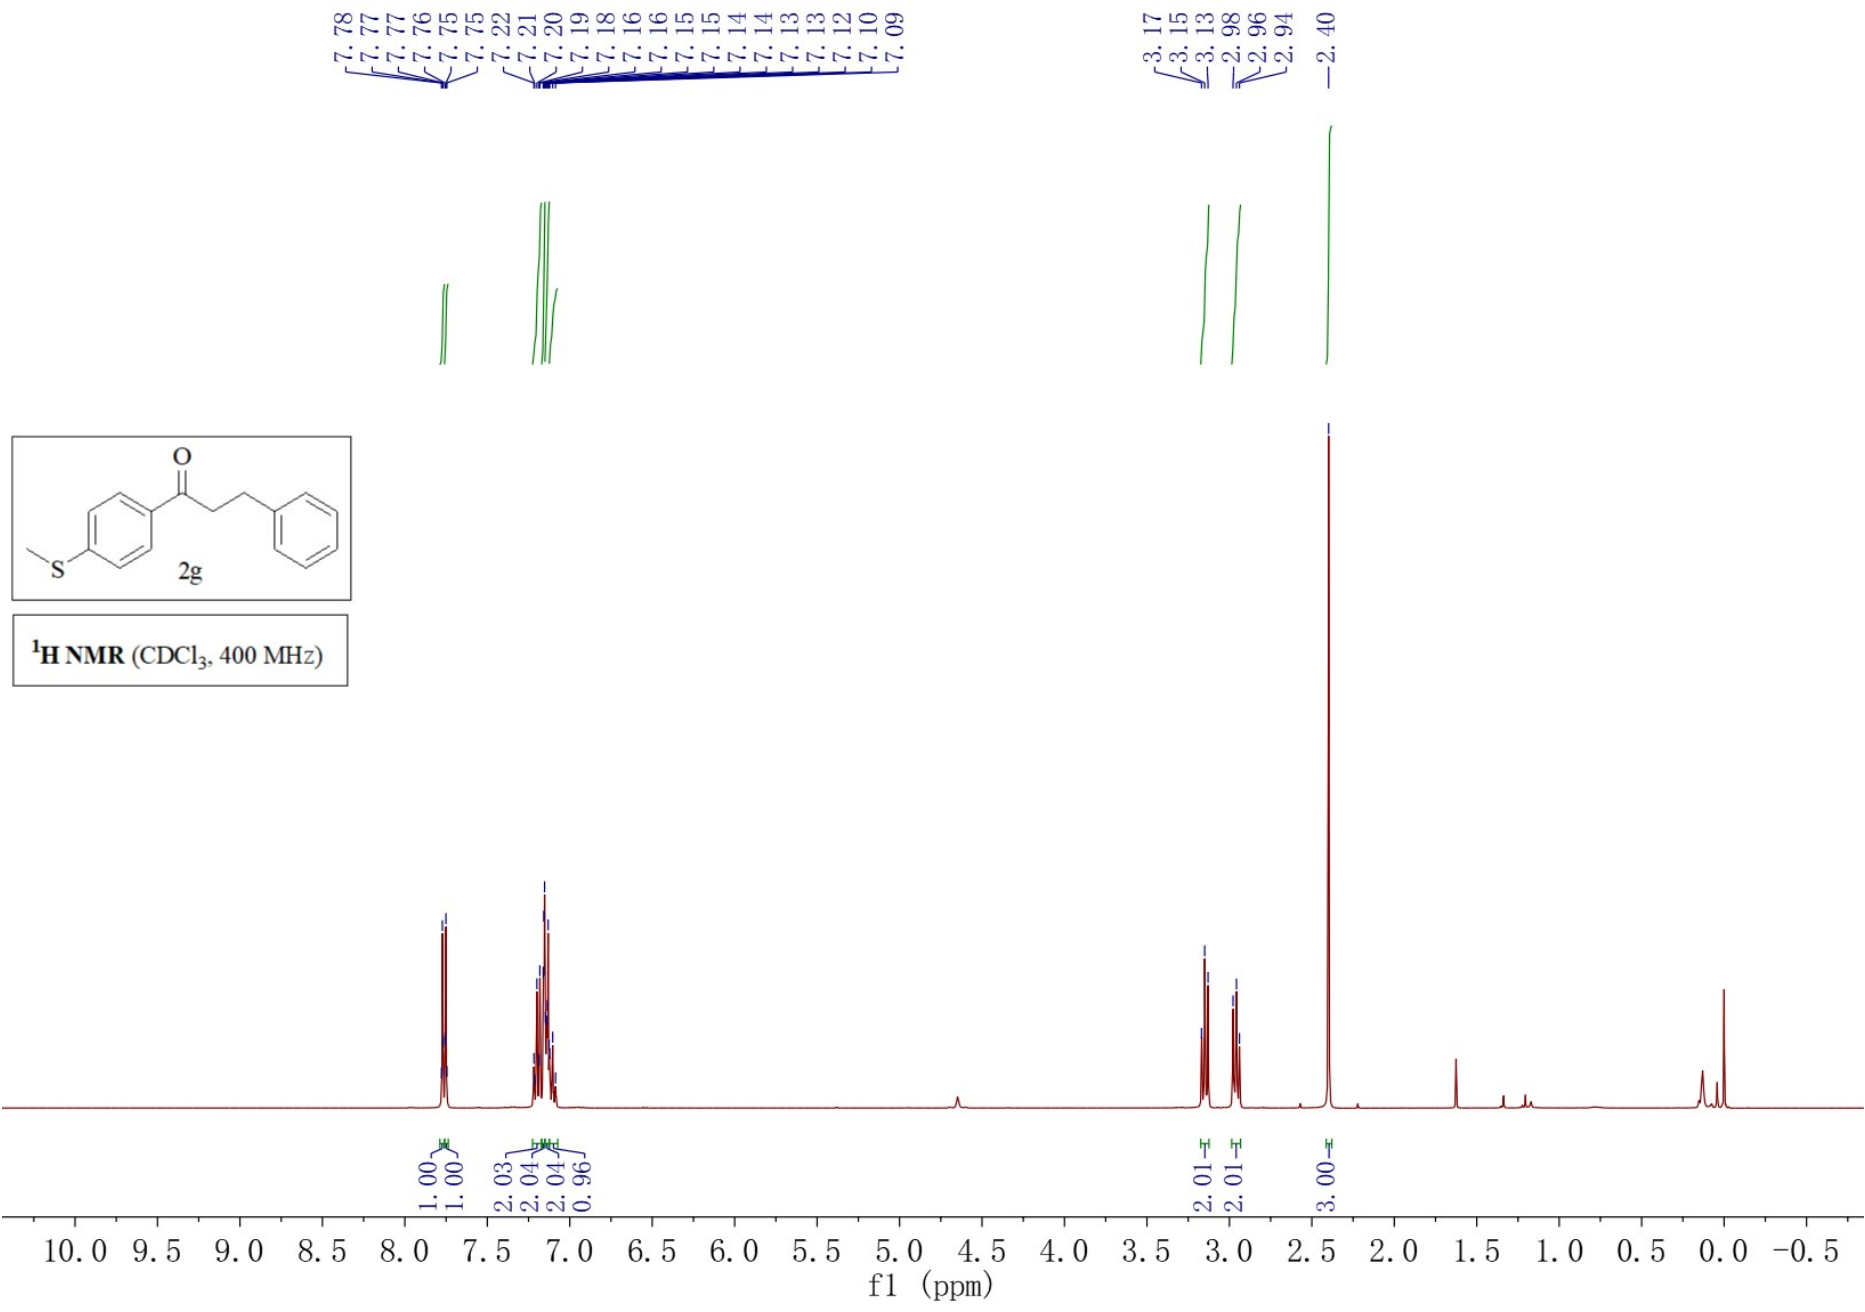

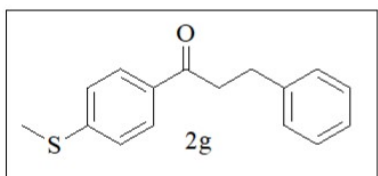

$^{13}\text{C}\{^1\text{H}\}$  NMR ( $\text{CDCl}_3$ , 75 MHz)

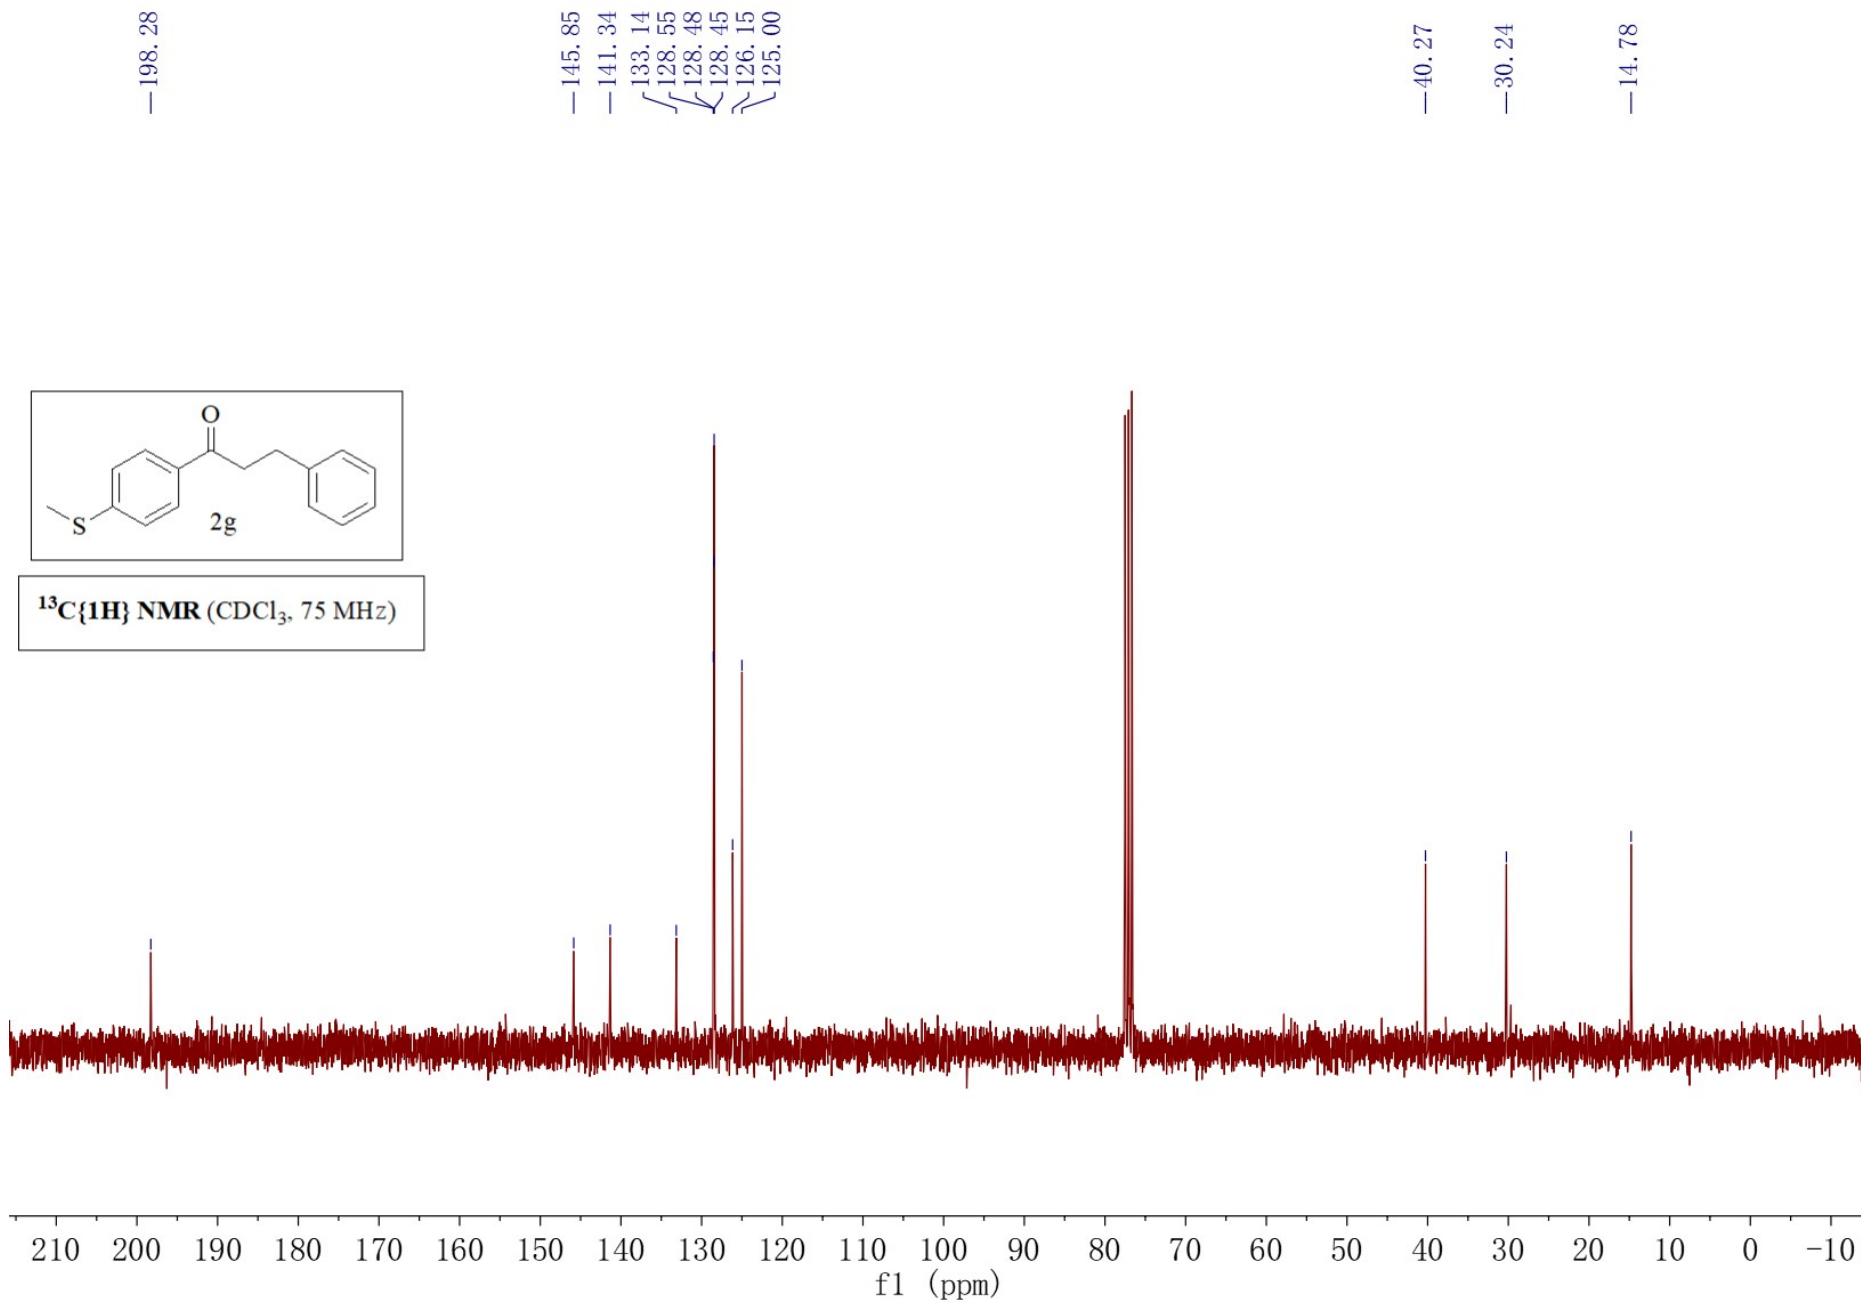

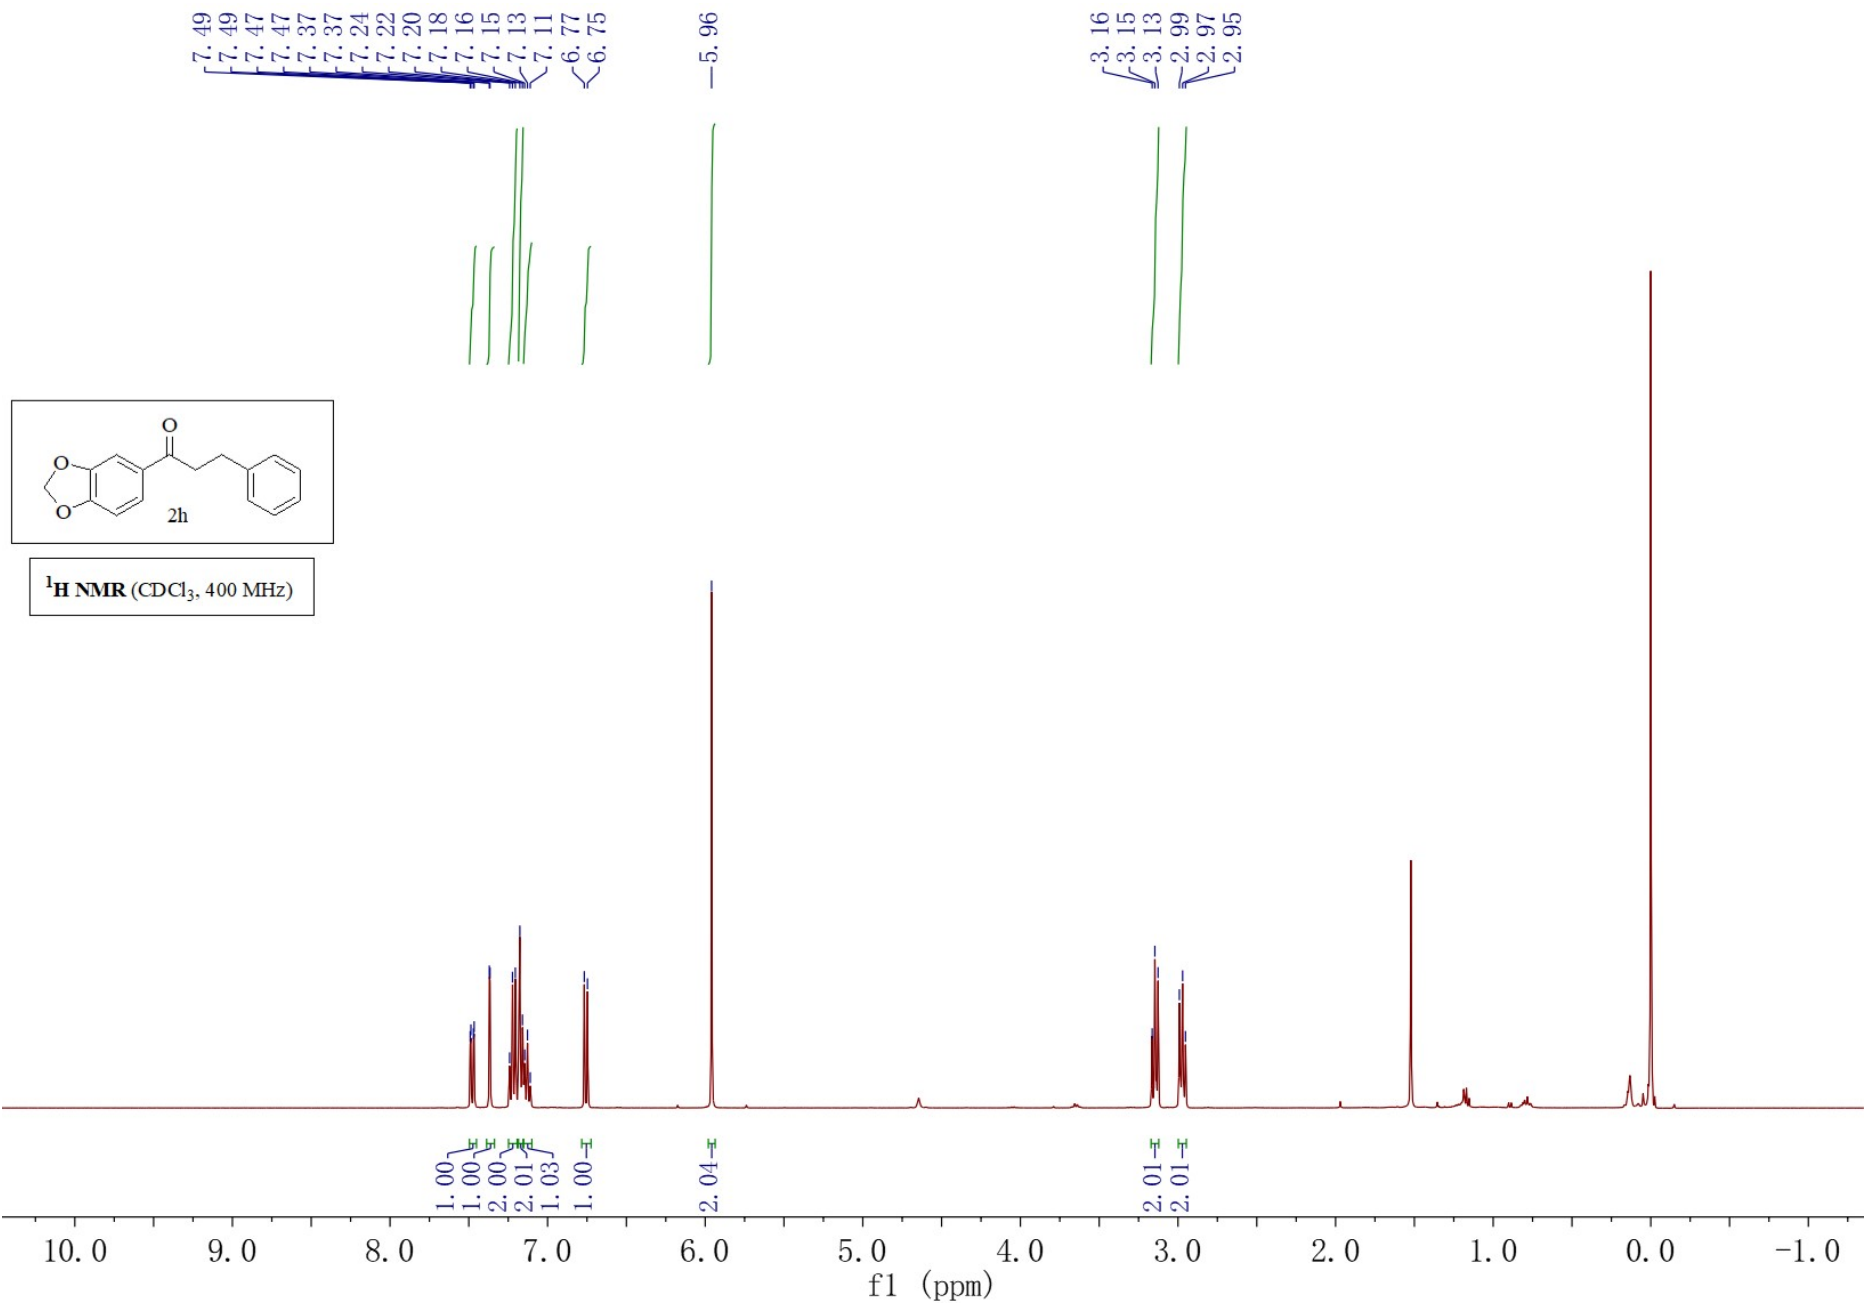

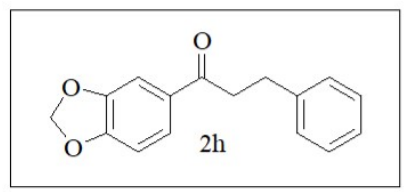

$^{13}\text{C}\{^1\text{H}\}$  NMR ( $\text{CDCl}_3$ , 75 MHz)

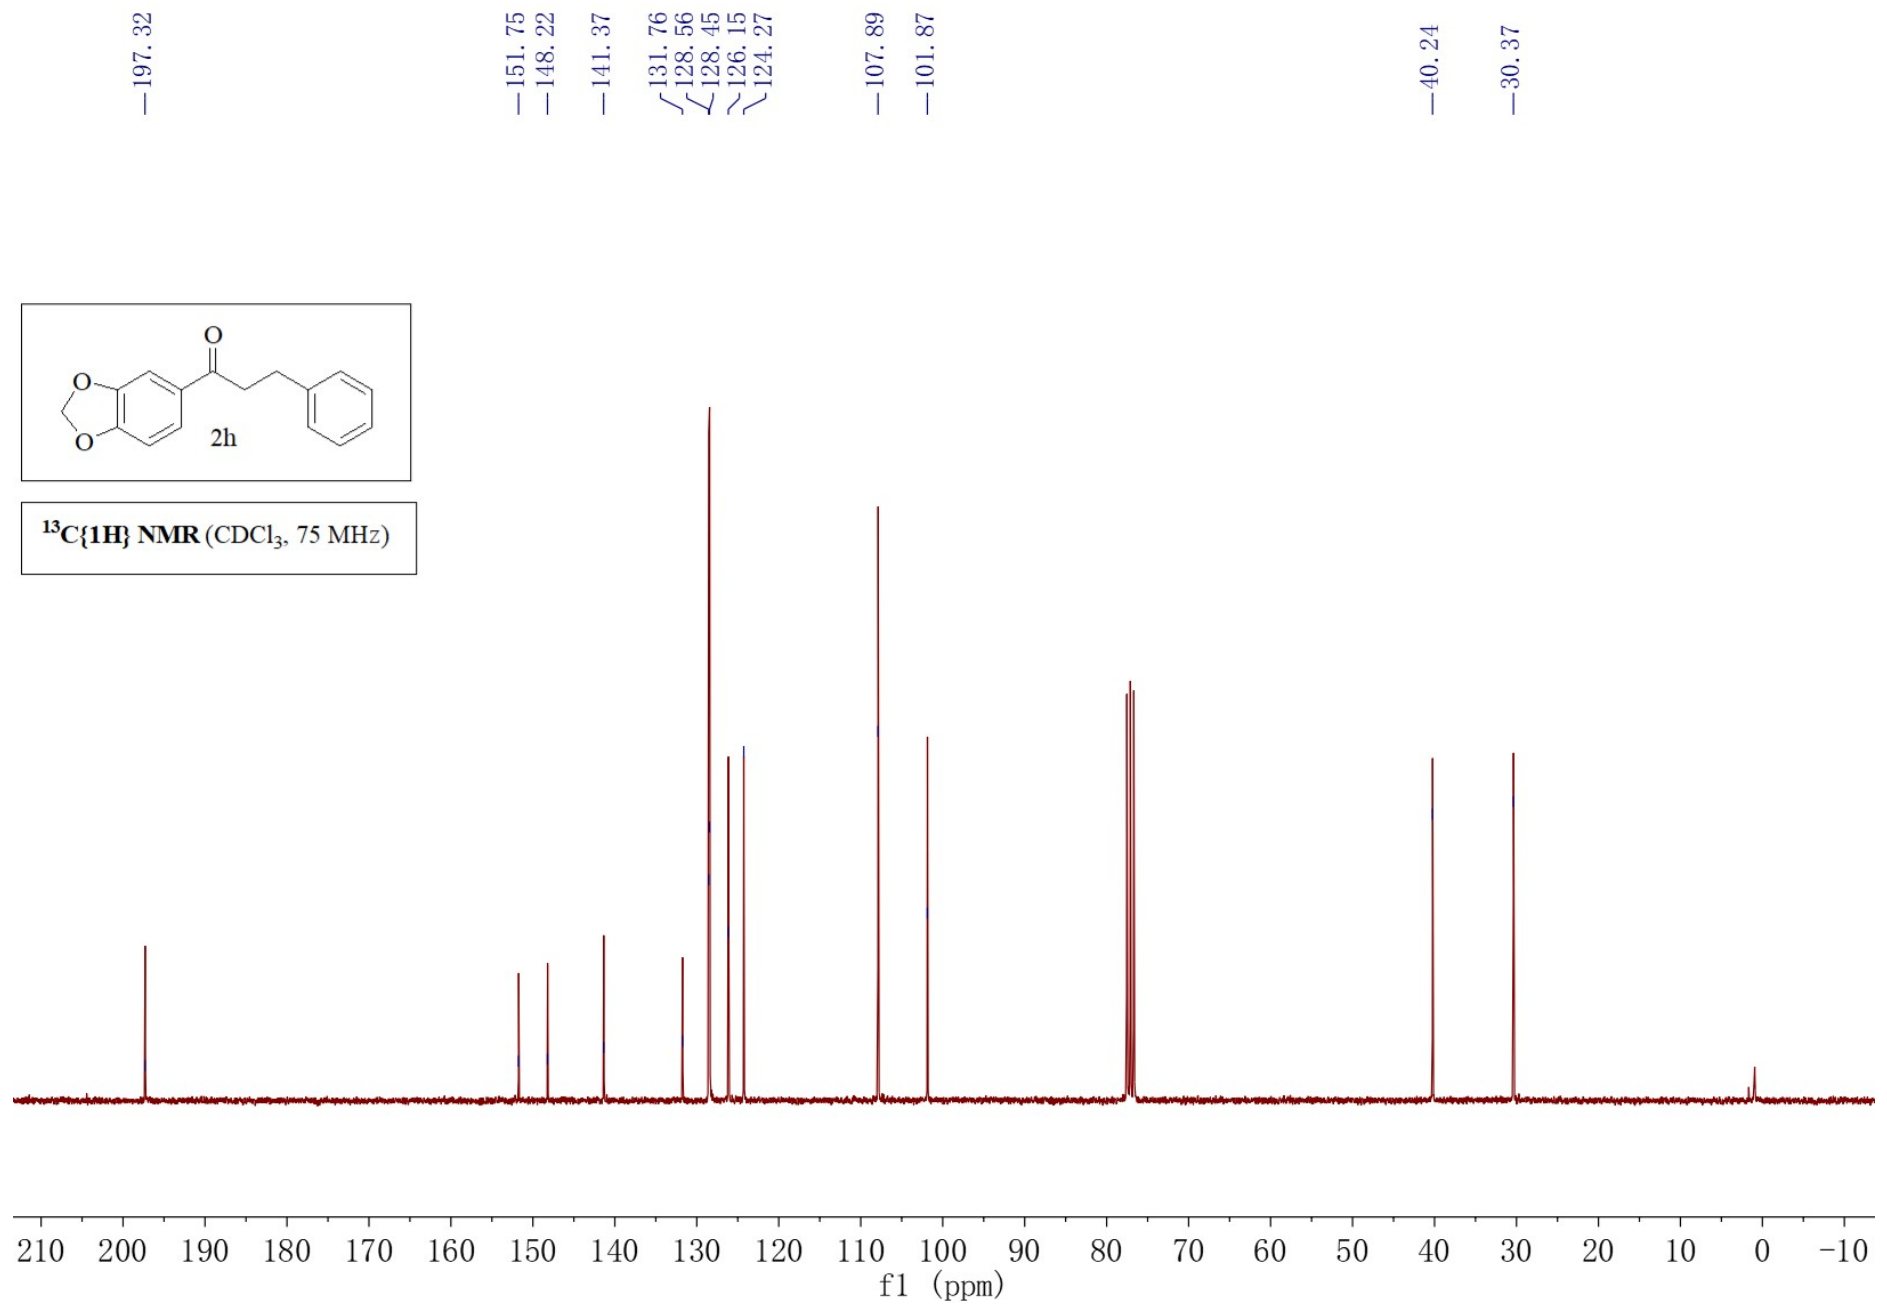

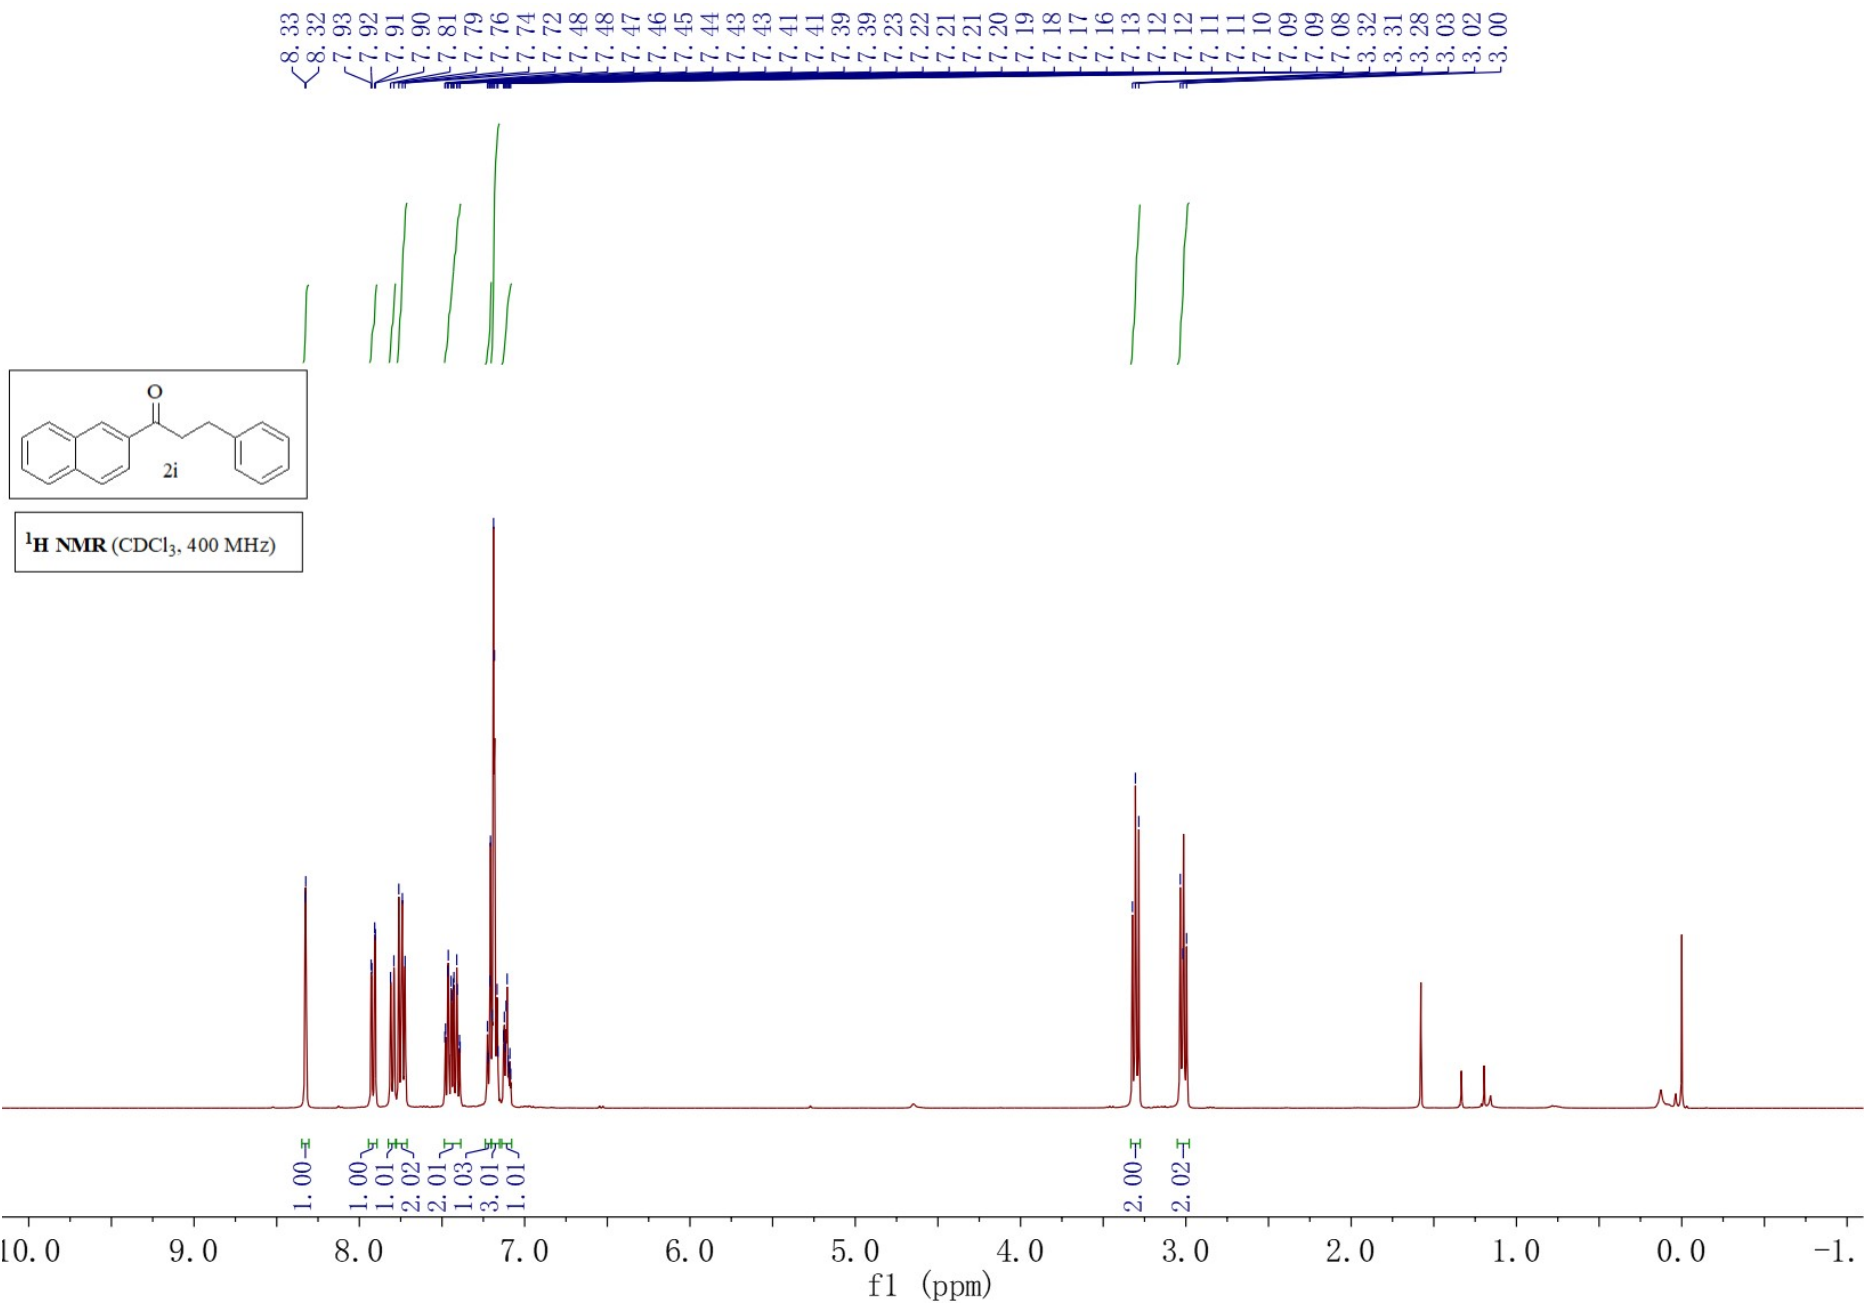

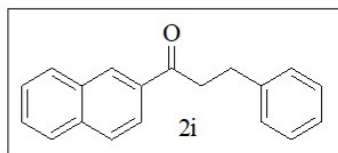

$^{13}\text{C}\{^1\text{H}\}$  NMR ( $\text{CDCl}_3$ , 75 MHz)

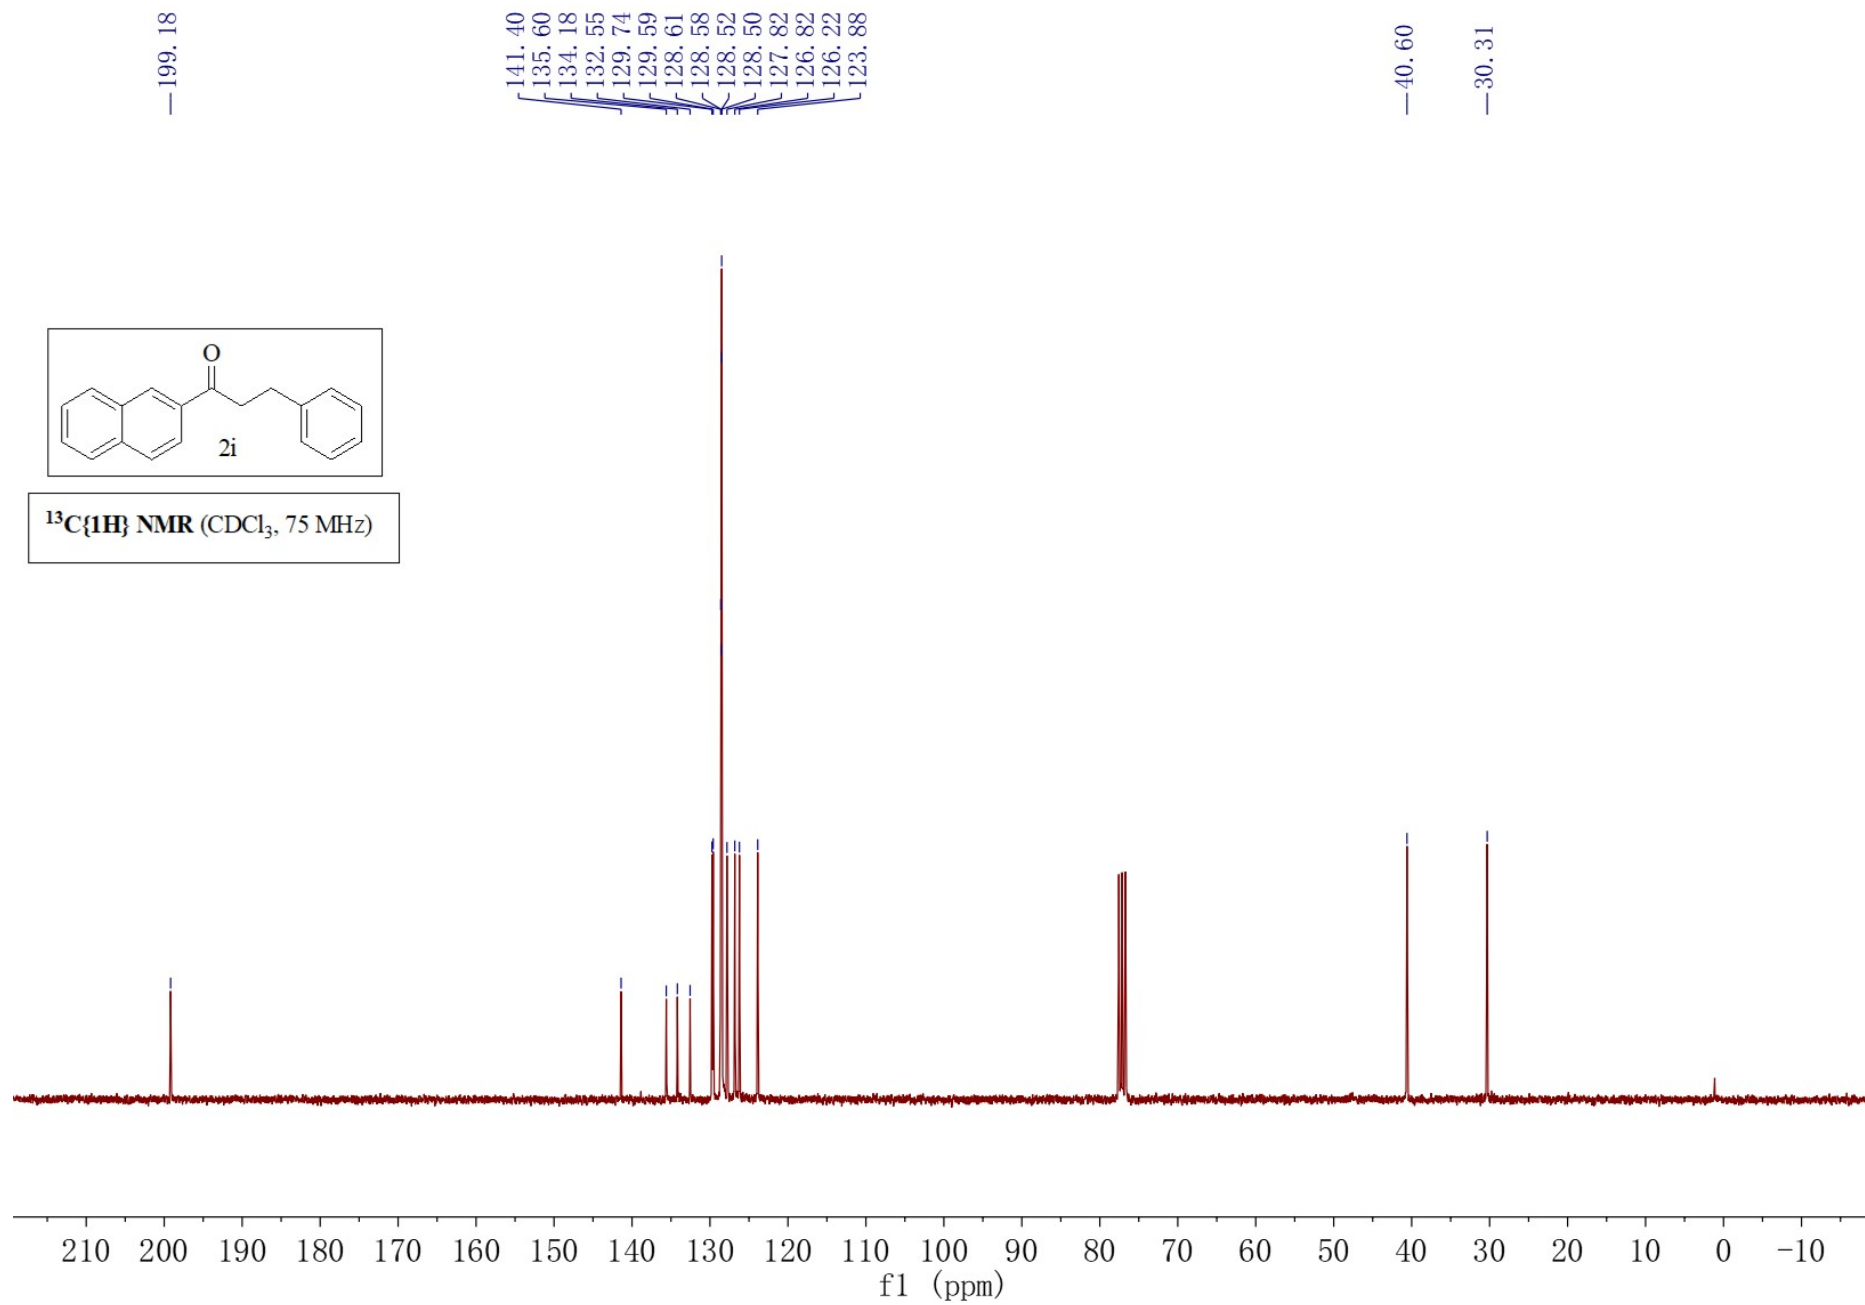



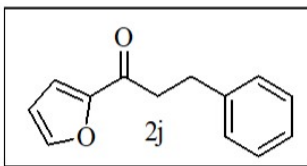

<sup>1</sup>H NMR (CDCl<sub>3</sub>, 400 MHz)

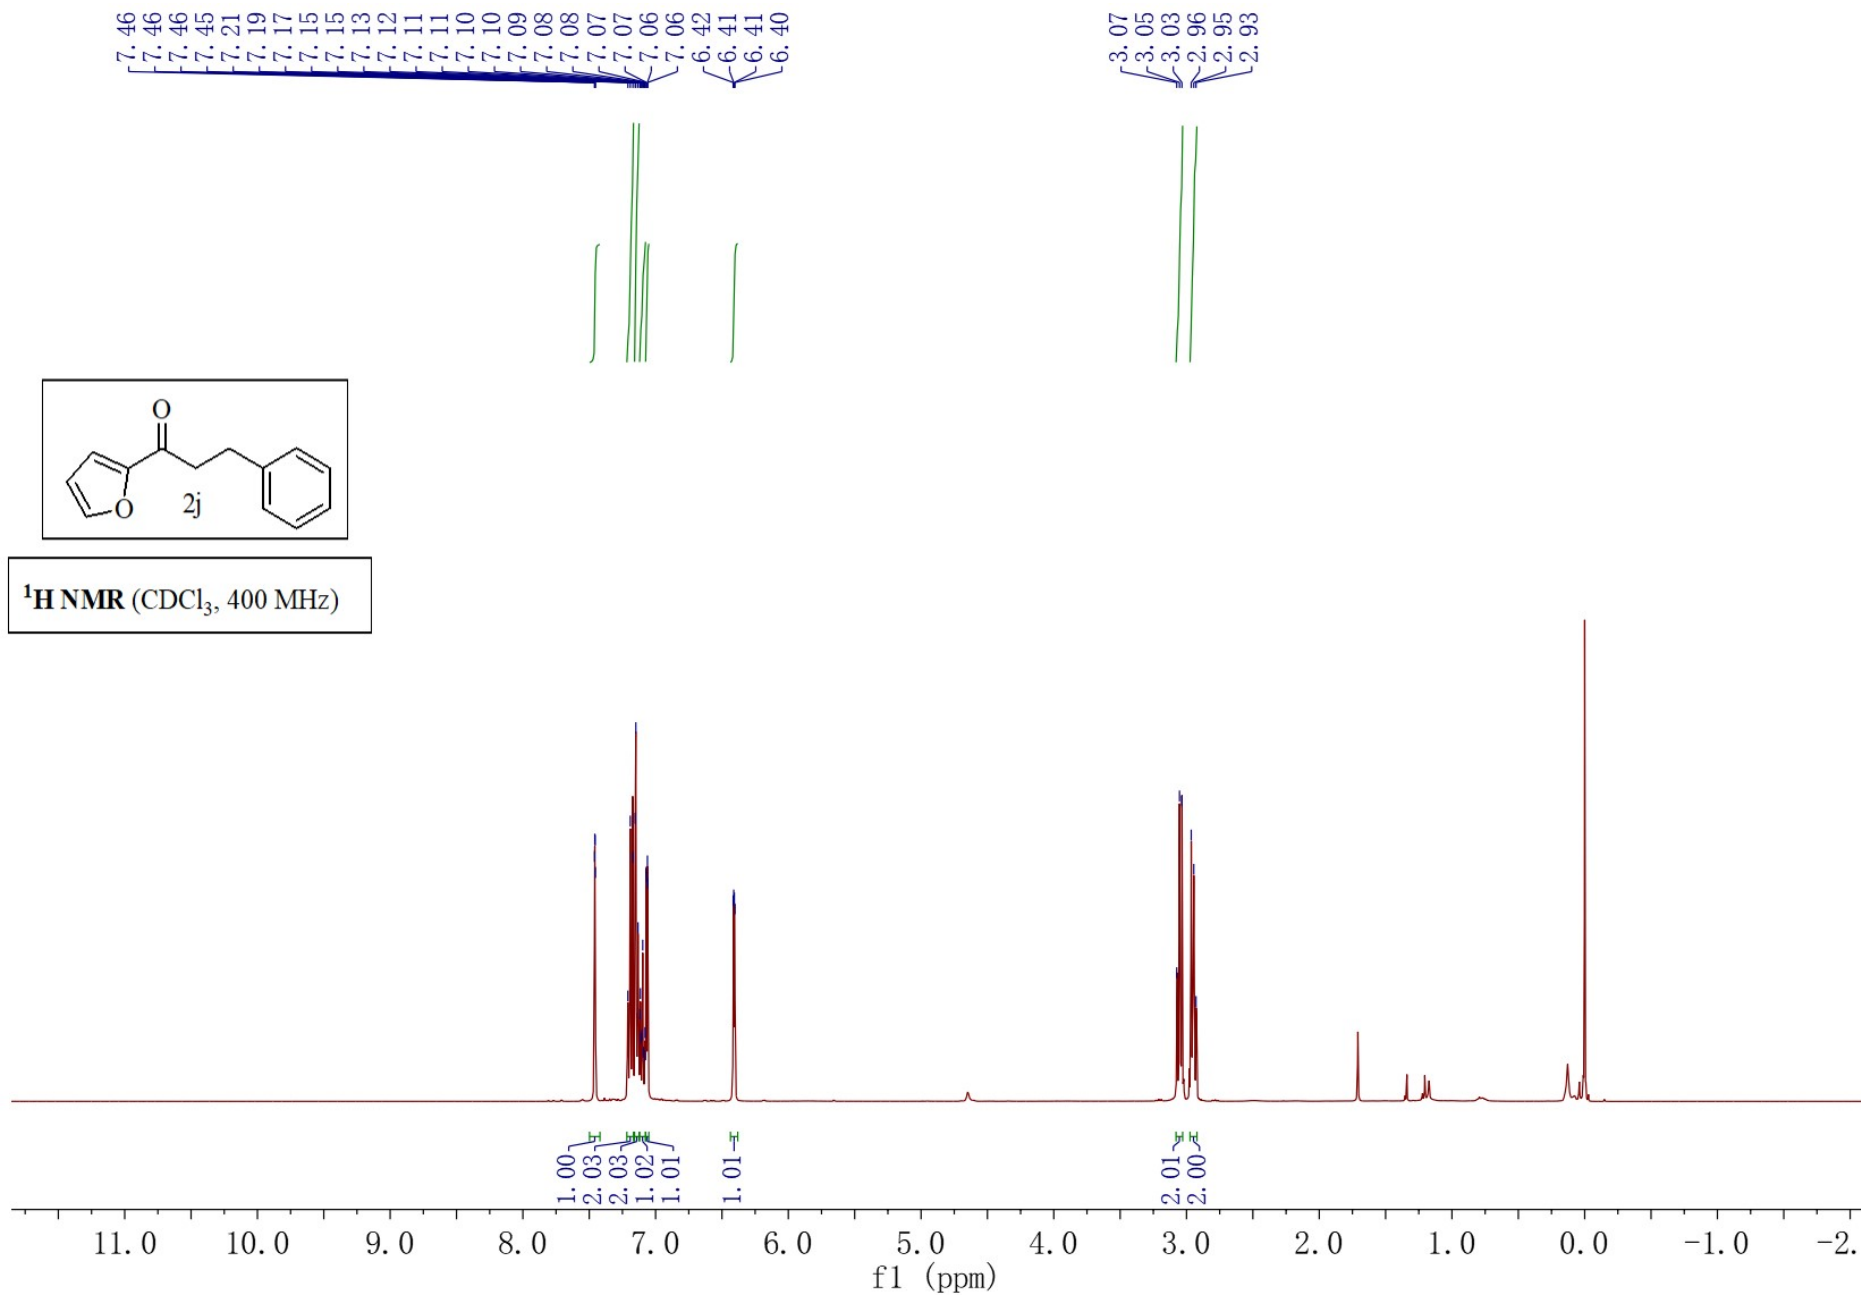

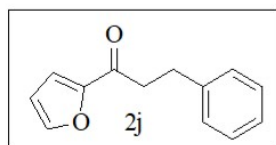

$^{13}\text{C}\{^1\text{H}\}$  NMR ( $\text{CDCl}_3$ , 75 MHz)

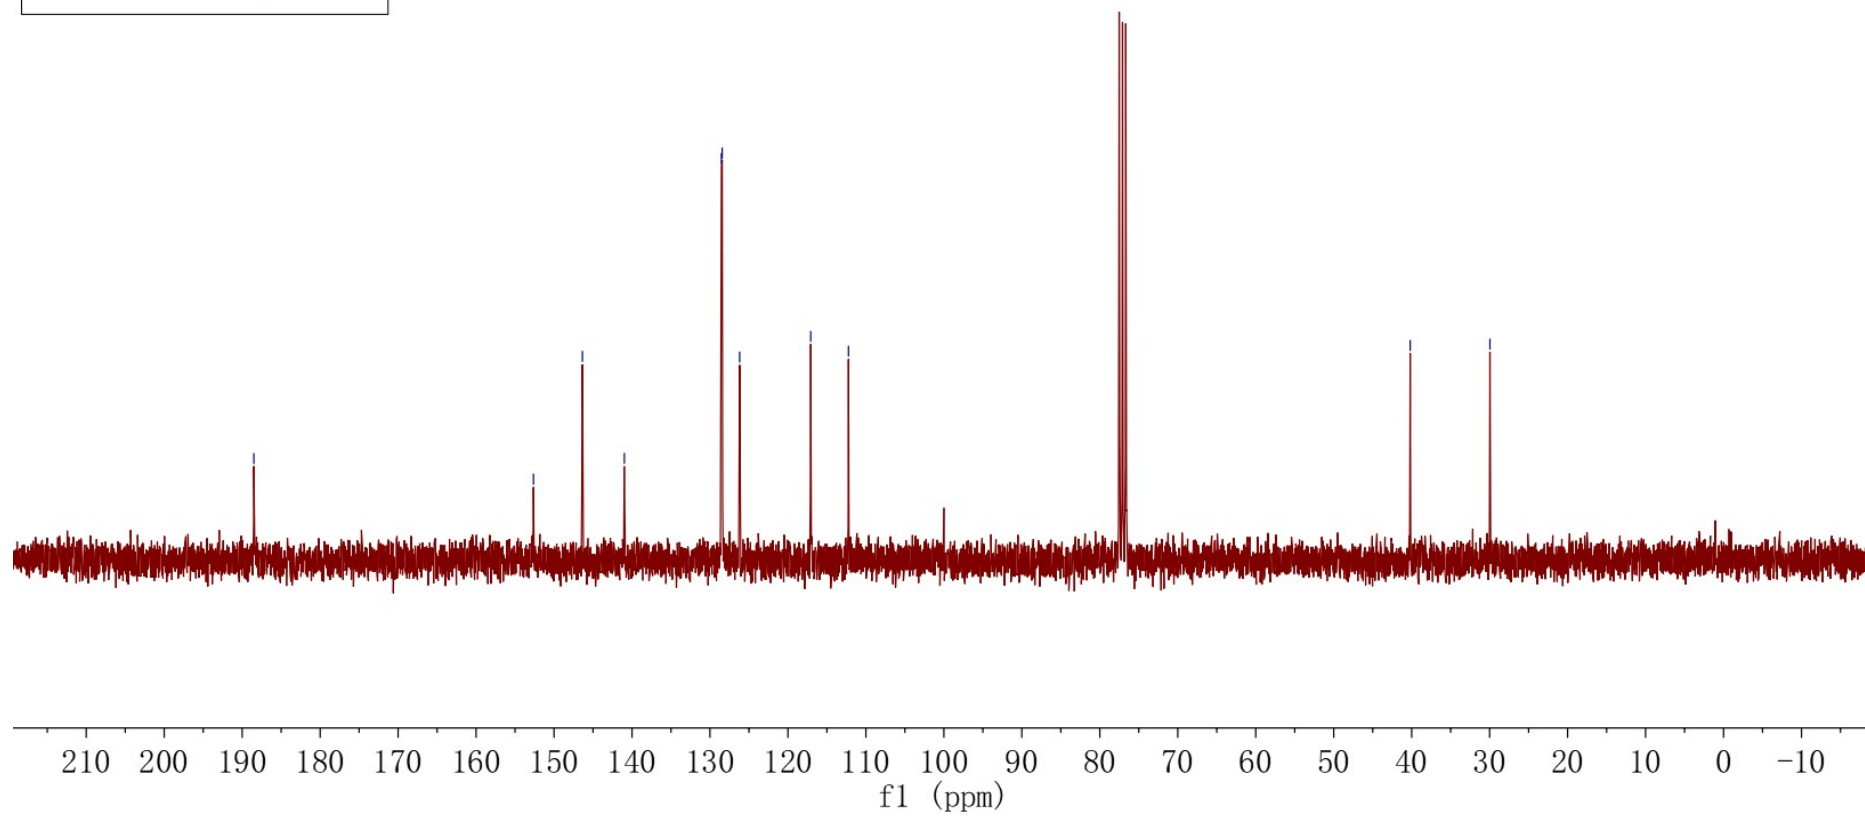

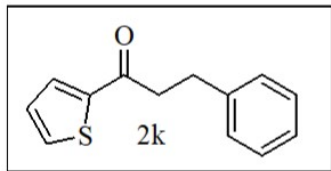

<sup>1</sup>H NMR (CDCl<sub>3</sub>, 300 MHz)

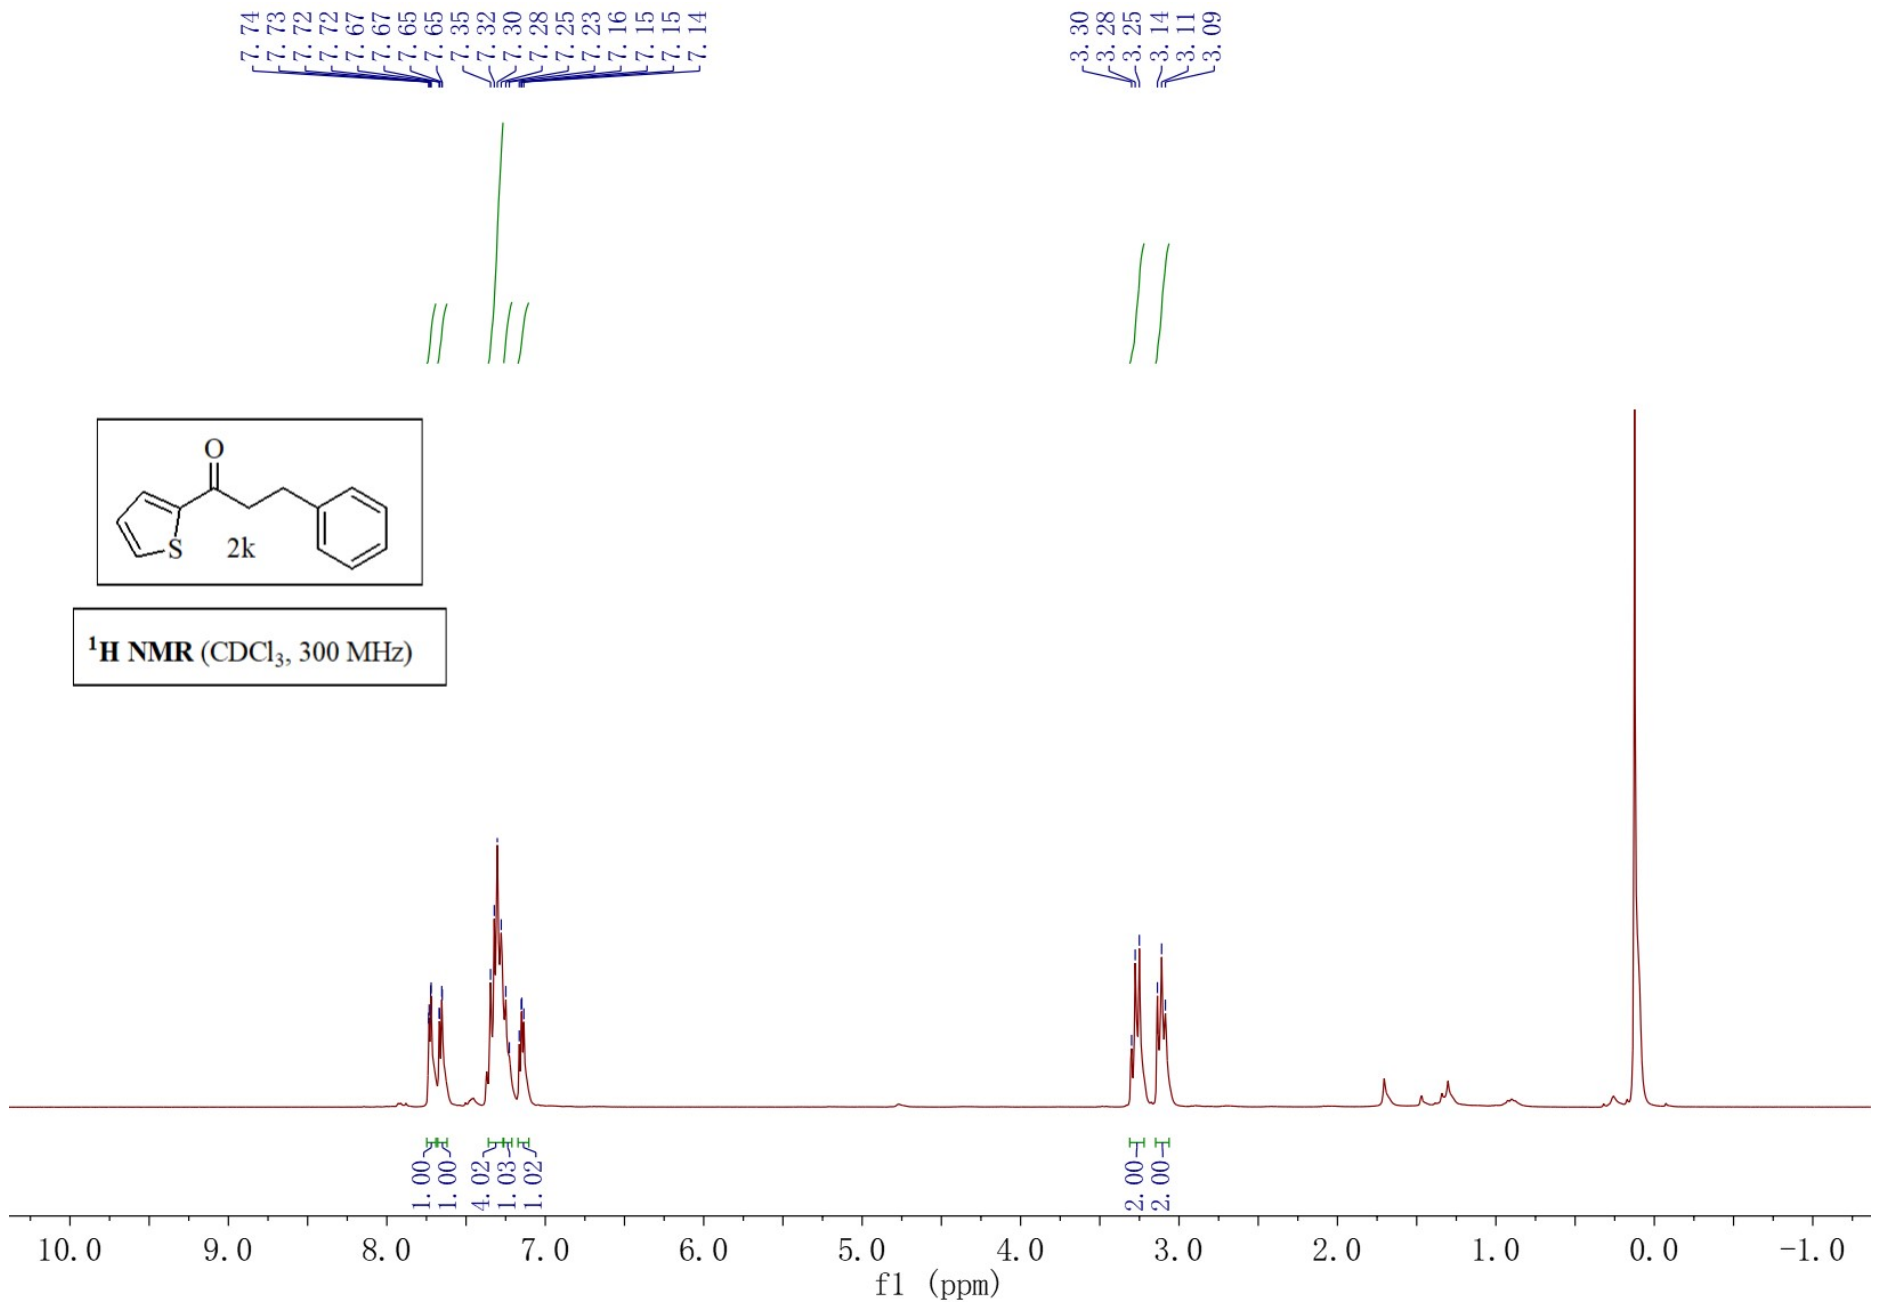

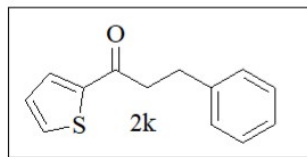

$^{13}\text{C}\{^1\text{H}\}$  NMR ( $\text{CDCl}_3$ , 75 MHz)

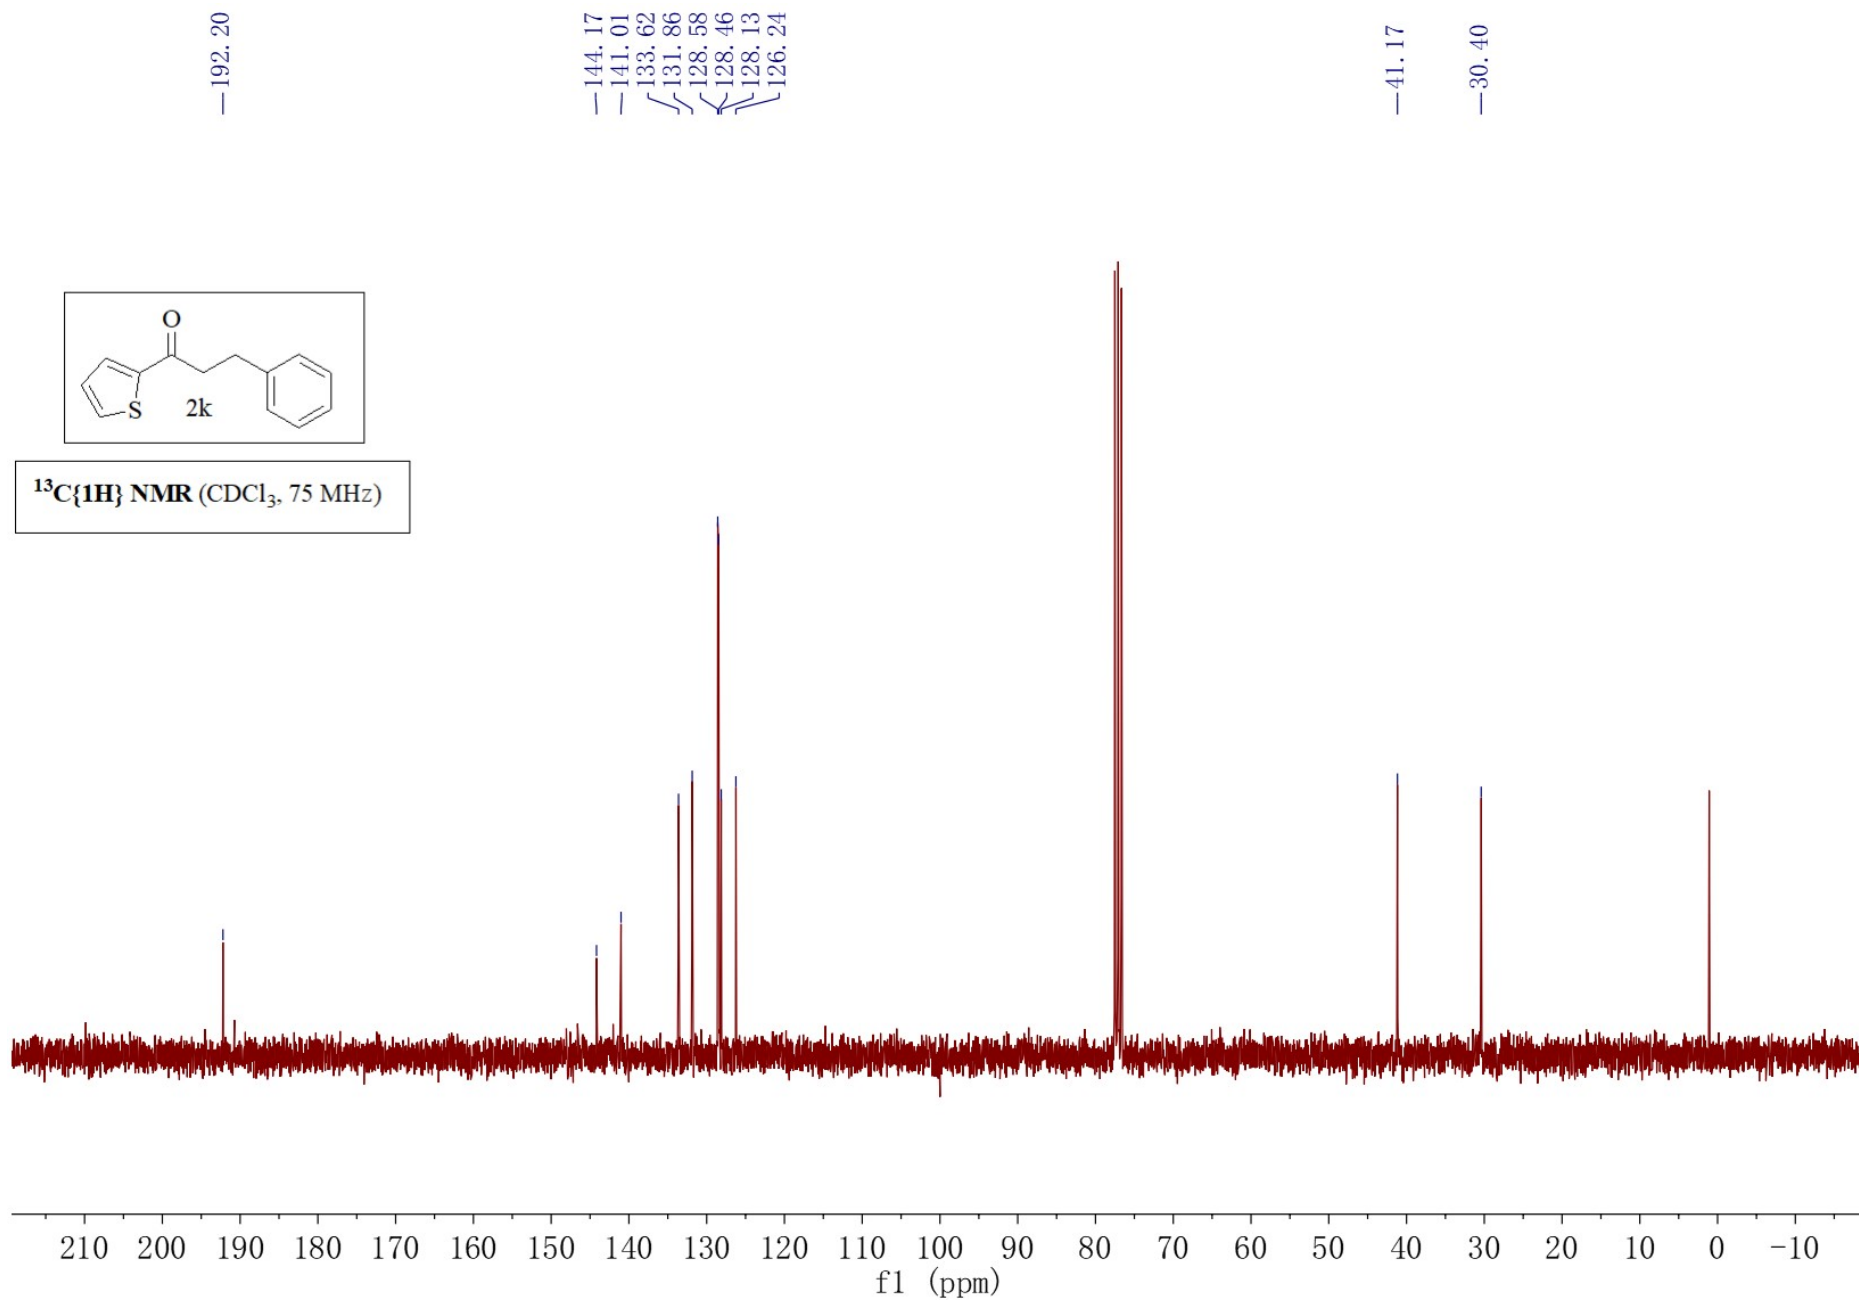

7.96  
7.92  
7.91  
7.89  
7.86  
7.49  
7.47  
7.44  
7.41  
7.36  
7.33  
7.31

3.40  
3.38  
3.35  
3.18  
3.15  
3.13

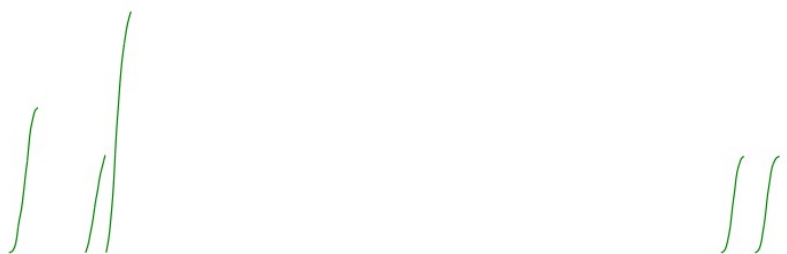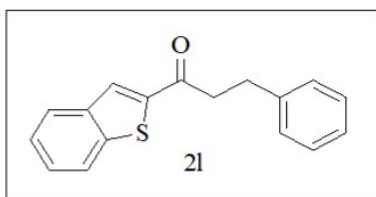

<sup>1</sup>H NMR (CDCl<sub>3</sub>, 300 MHz)

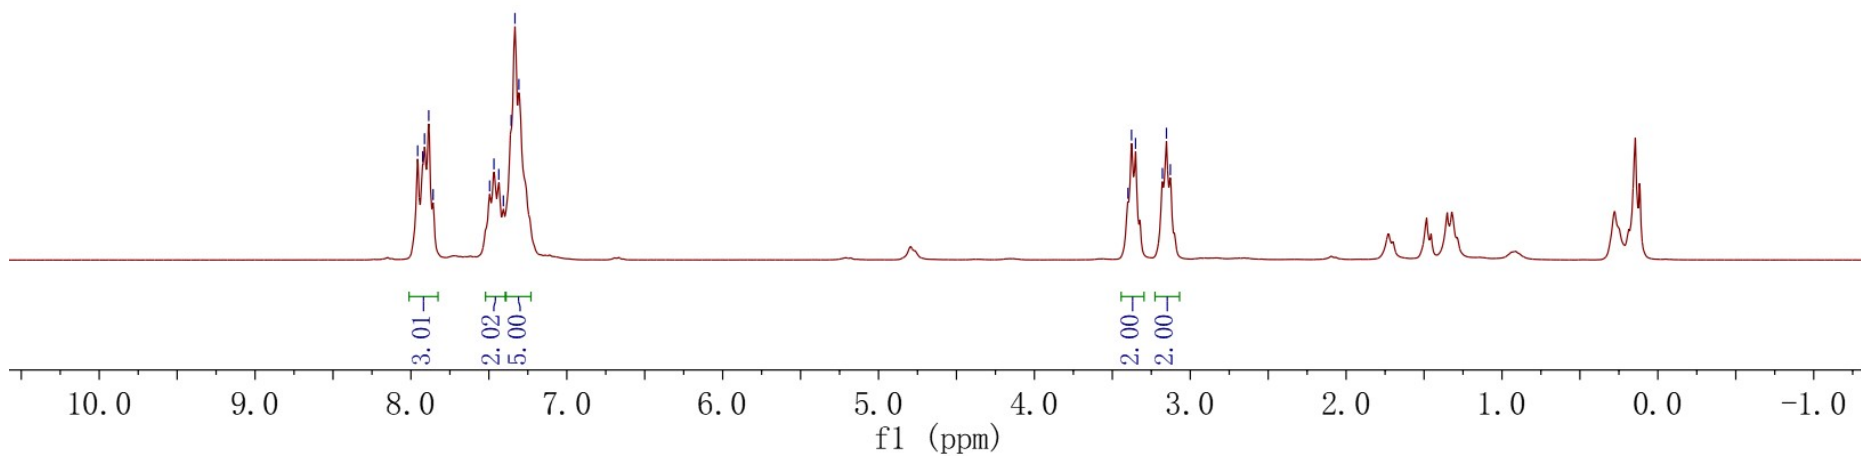

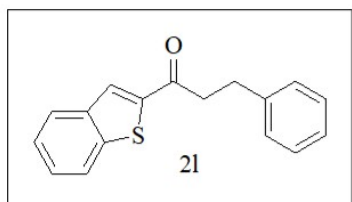

$^{13}\text{C}\{^1\text{H}\}$  NMR ( $\text{CDCl}_3$ , 75 MHz)

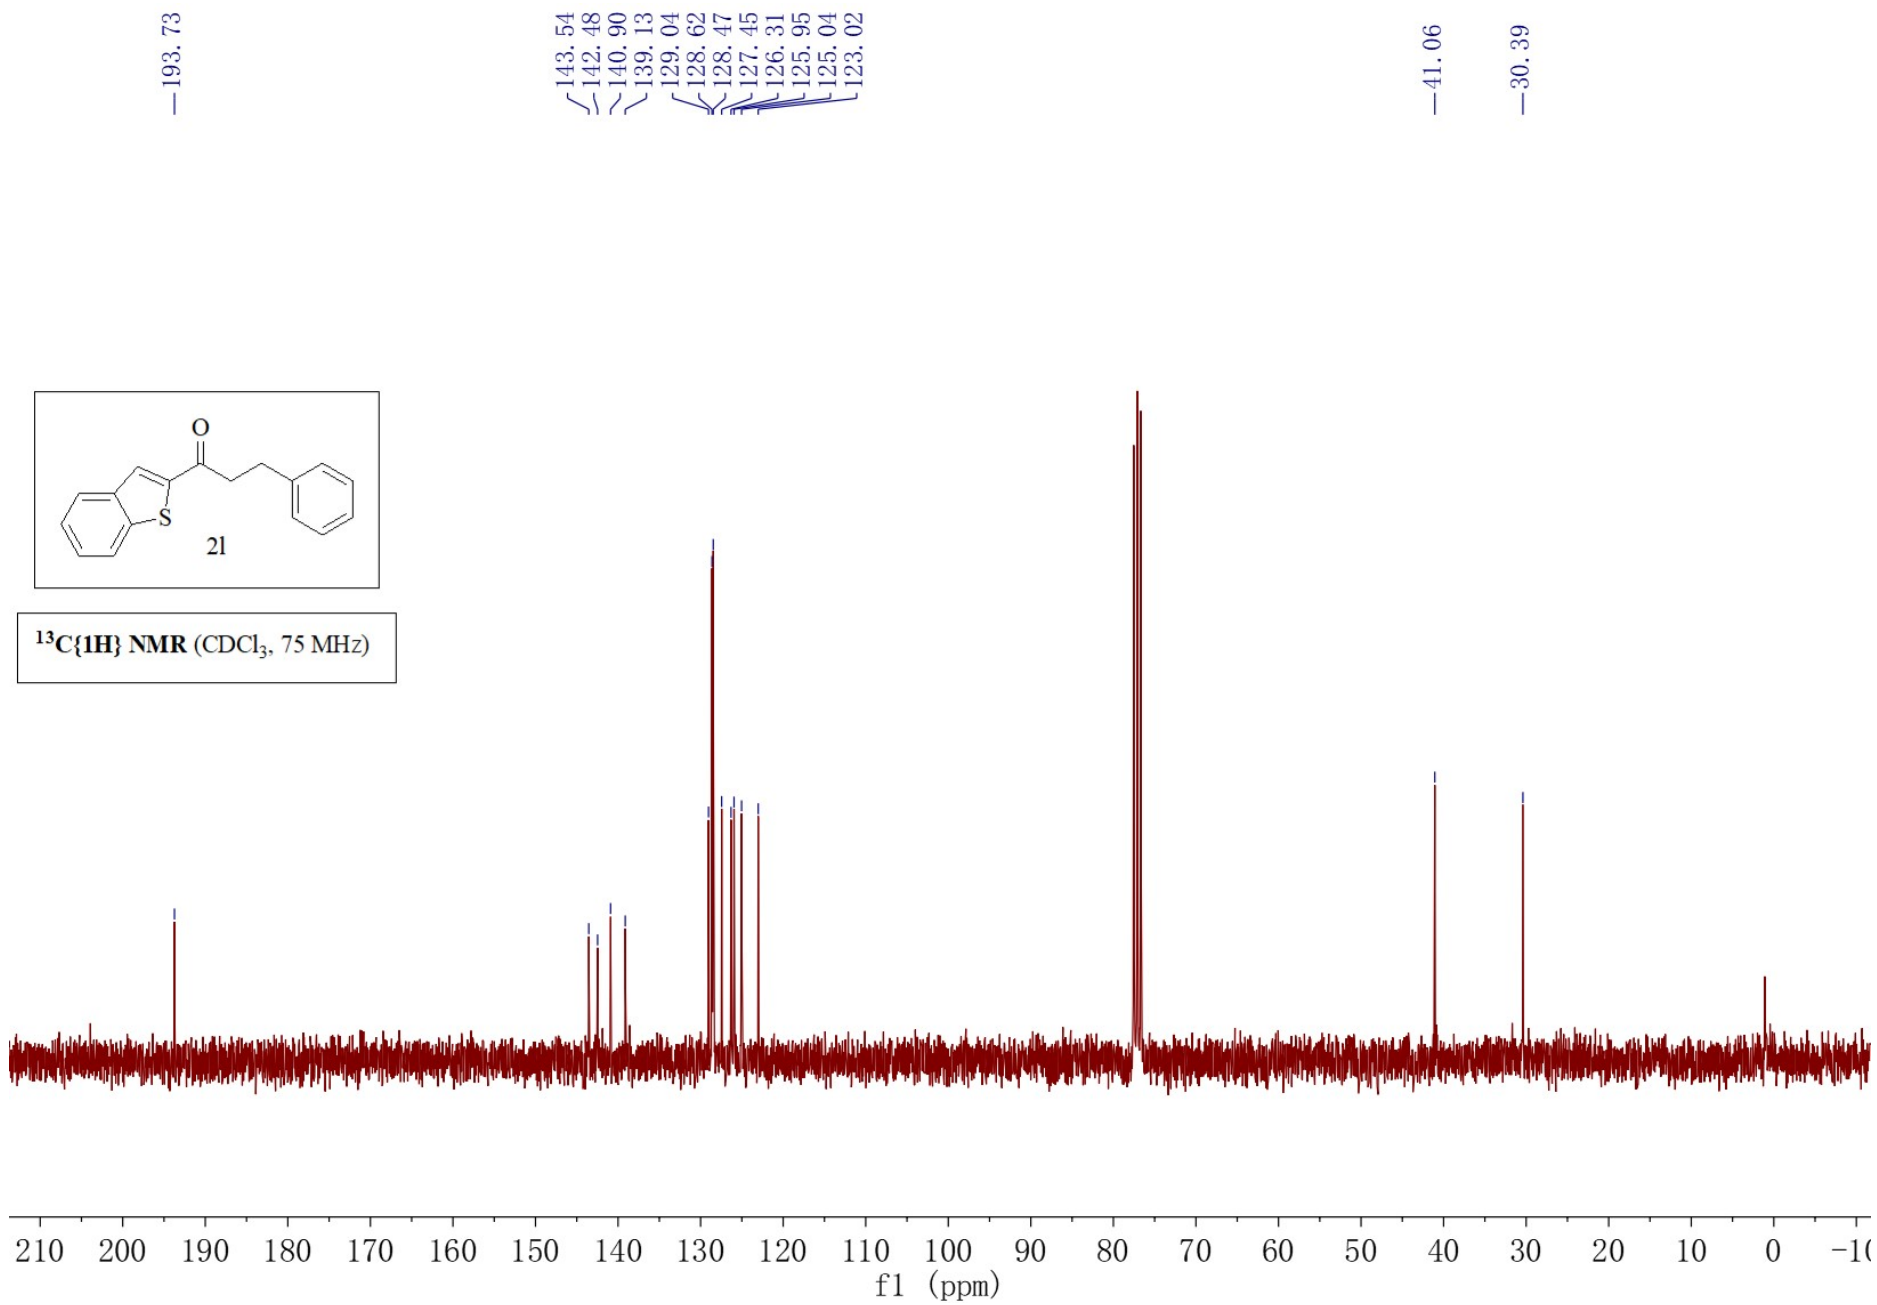

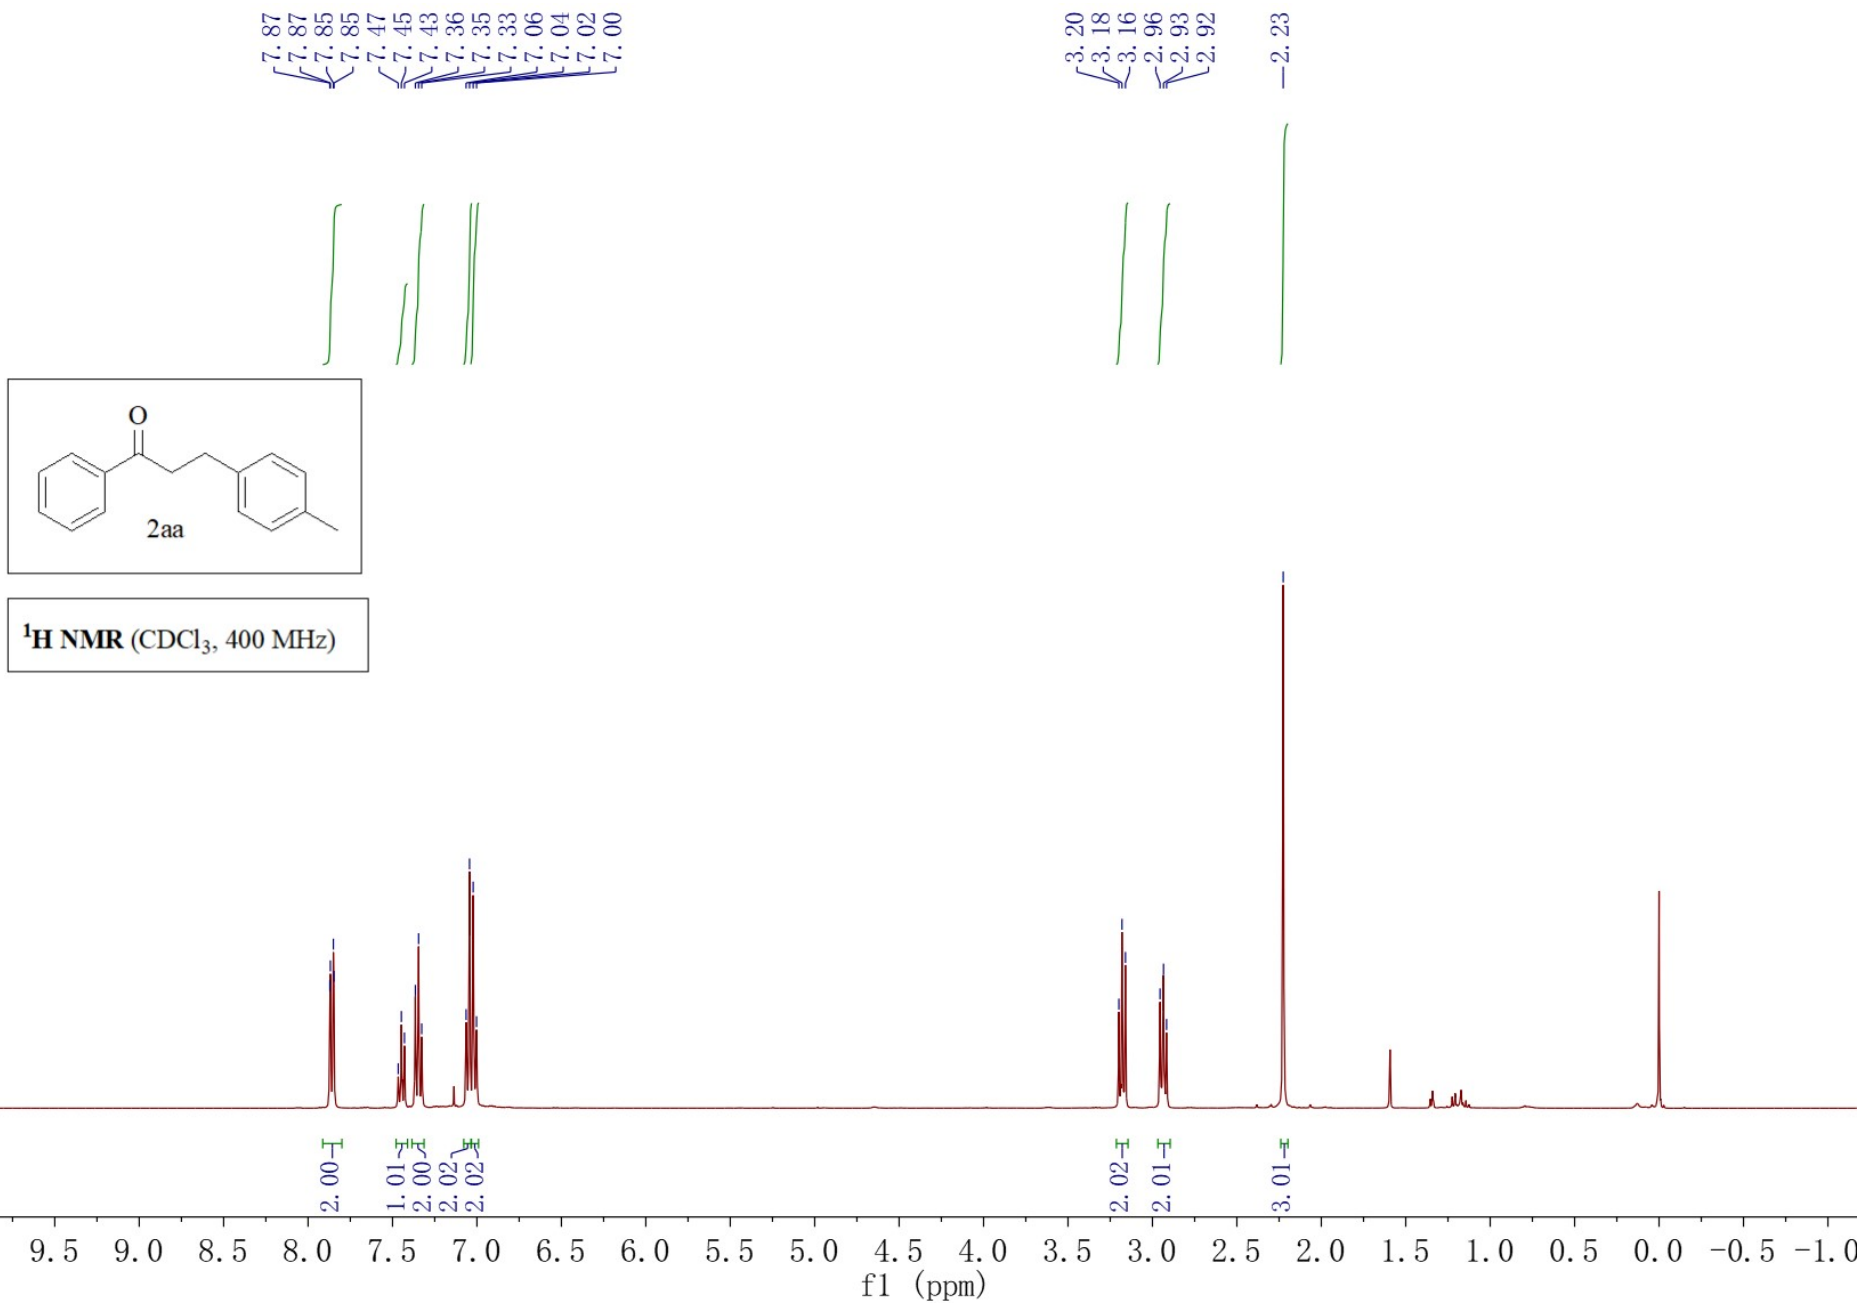

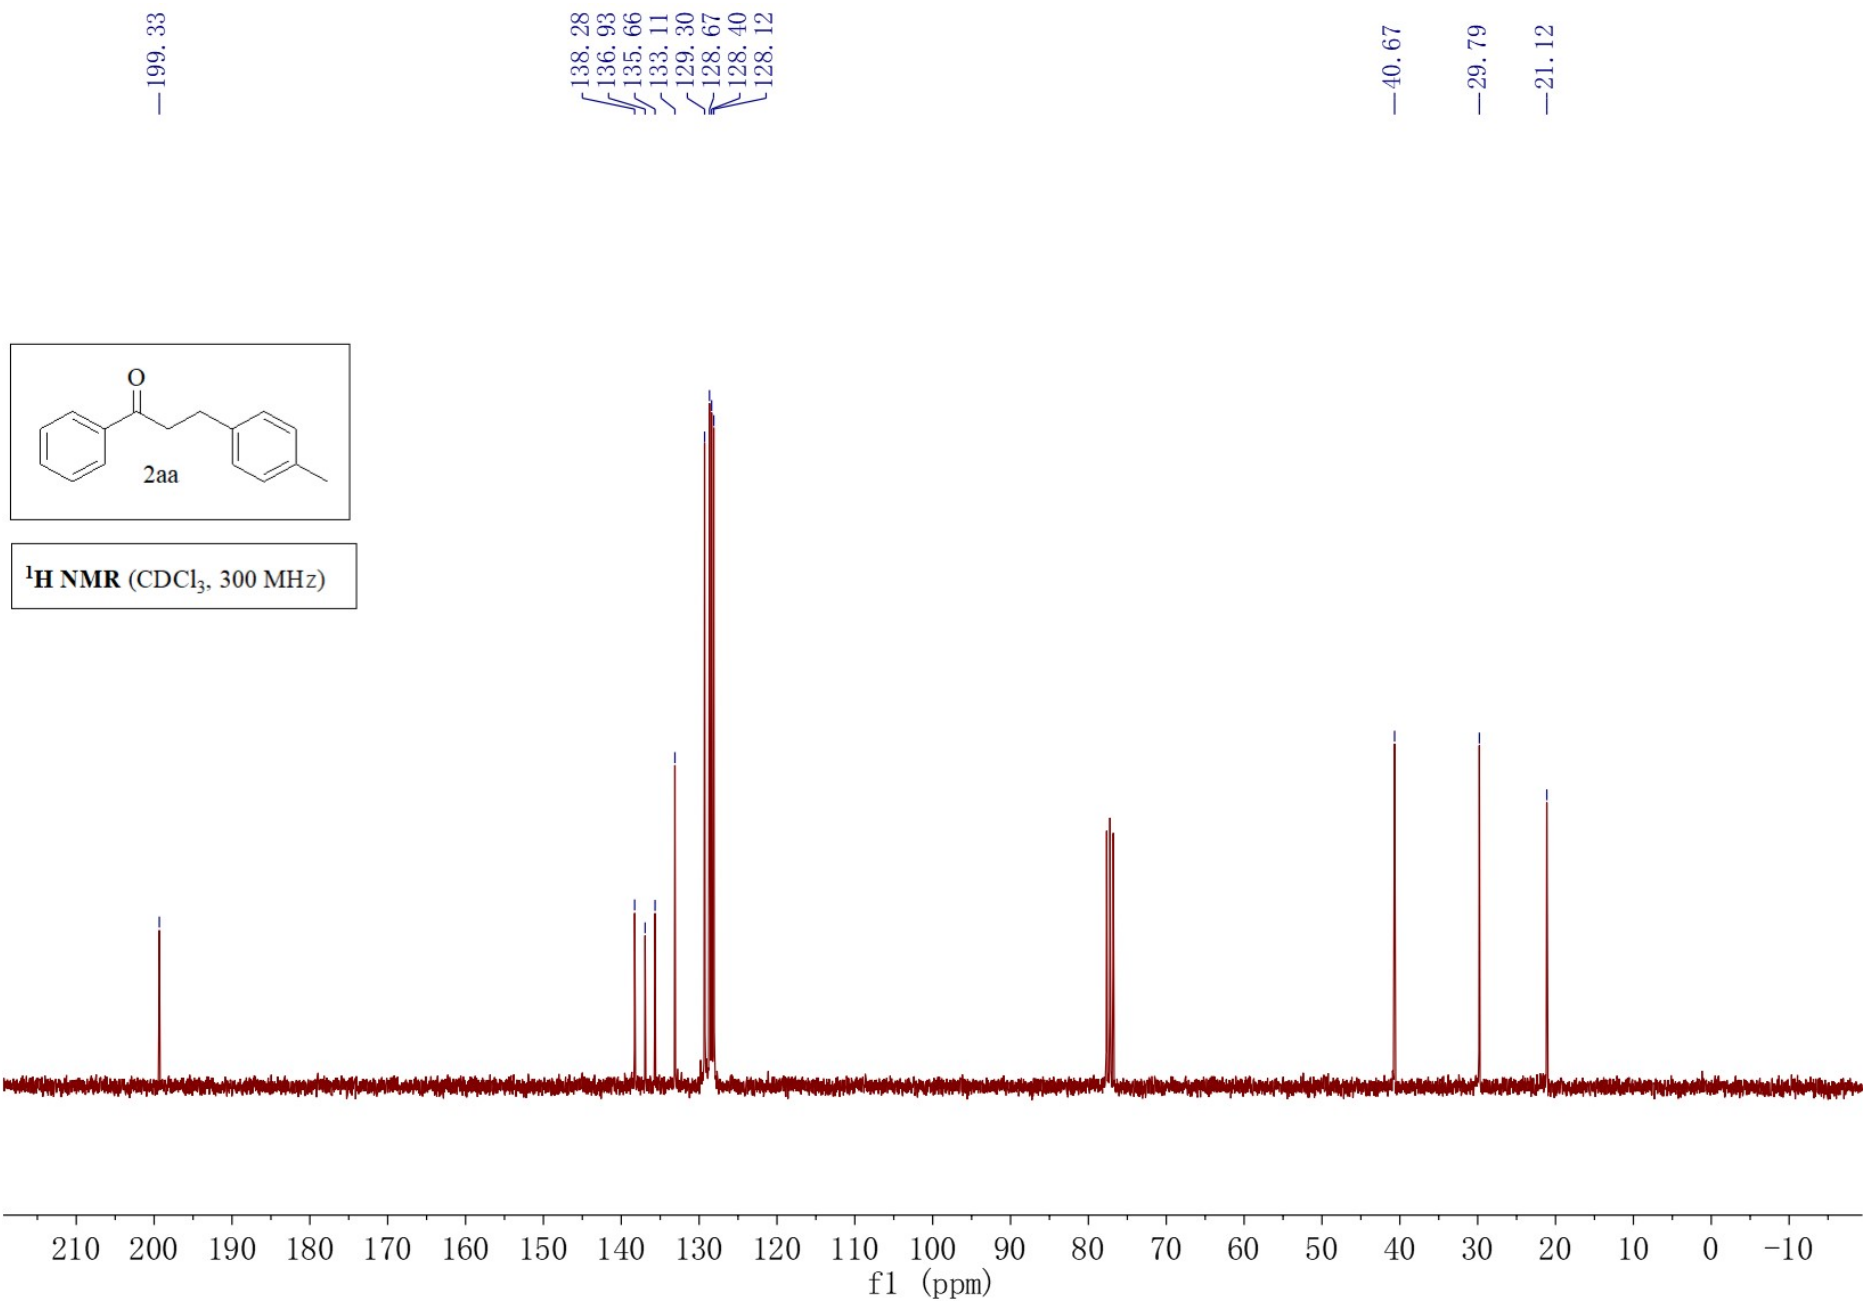



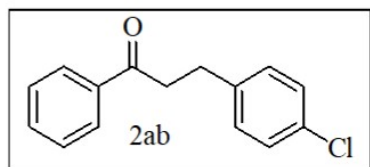

<sup>1</sup>H NMR (CDCl<sub>3</sub>, 300 MHz)

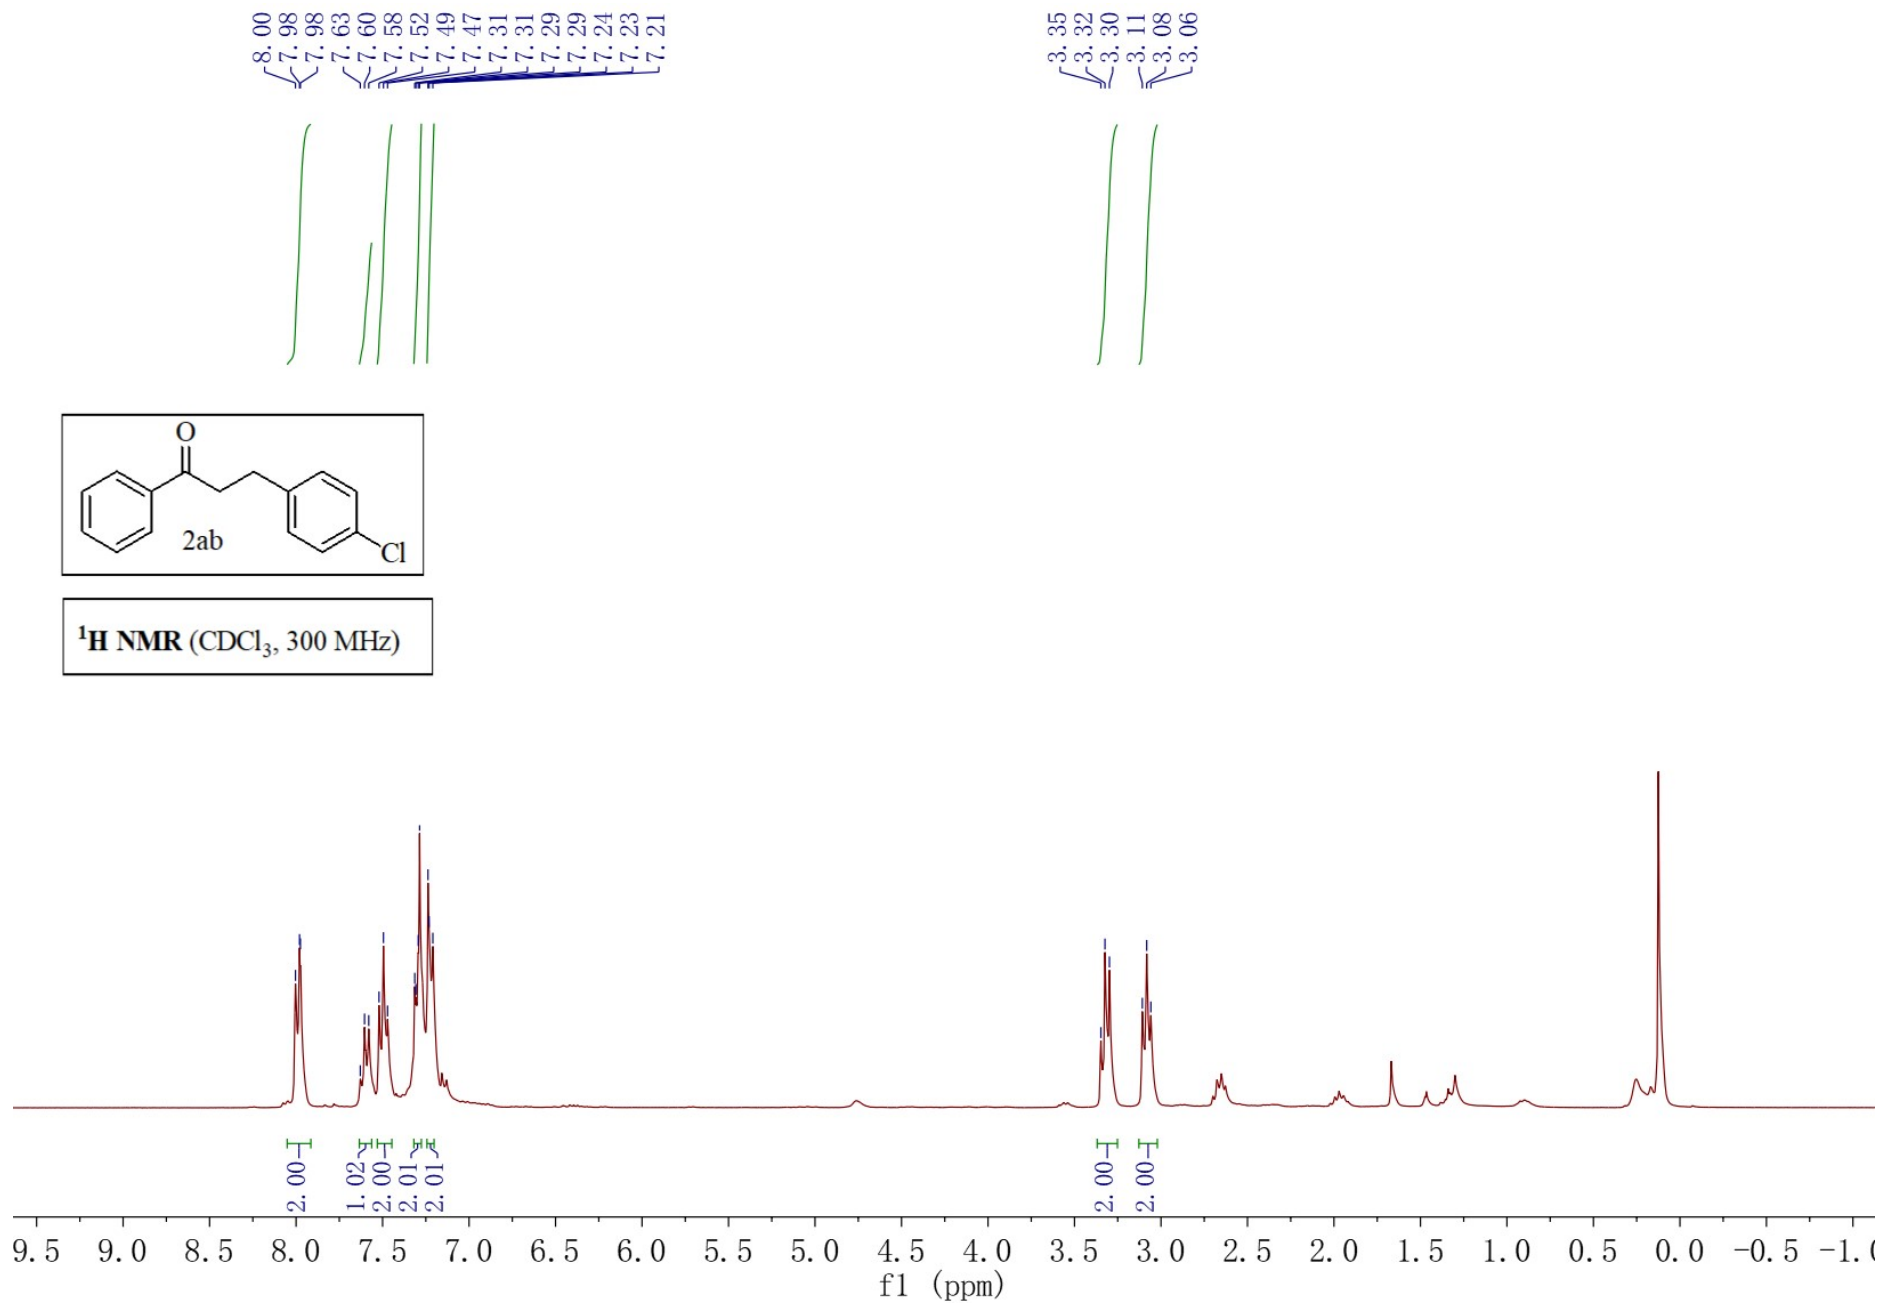

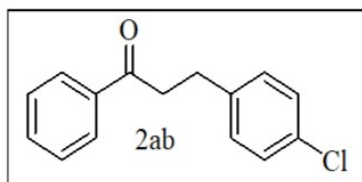

$^{13}\text{C}\{^1\text{H}\}$  NMR ( $\text{CDCl}_3$ , 75 MHz)

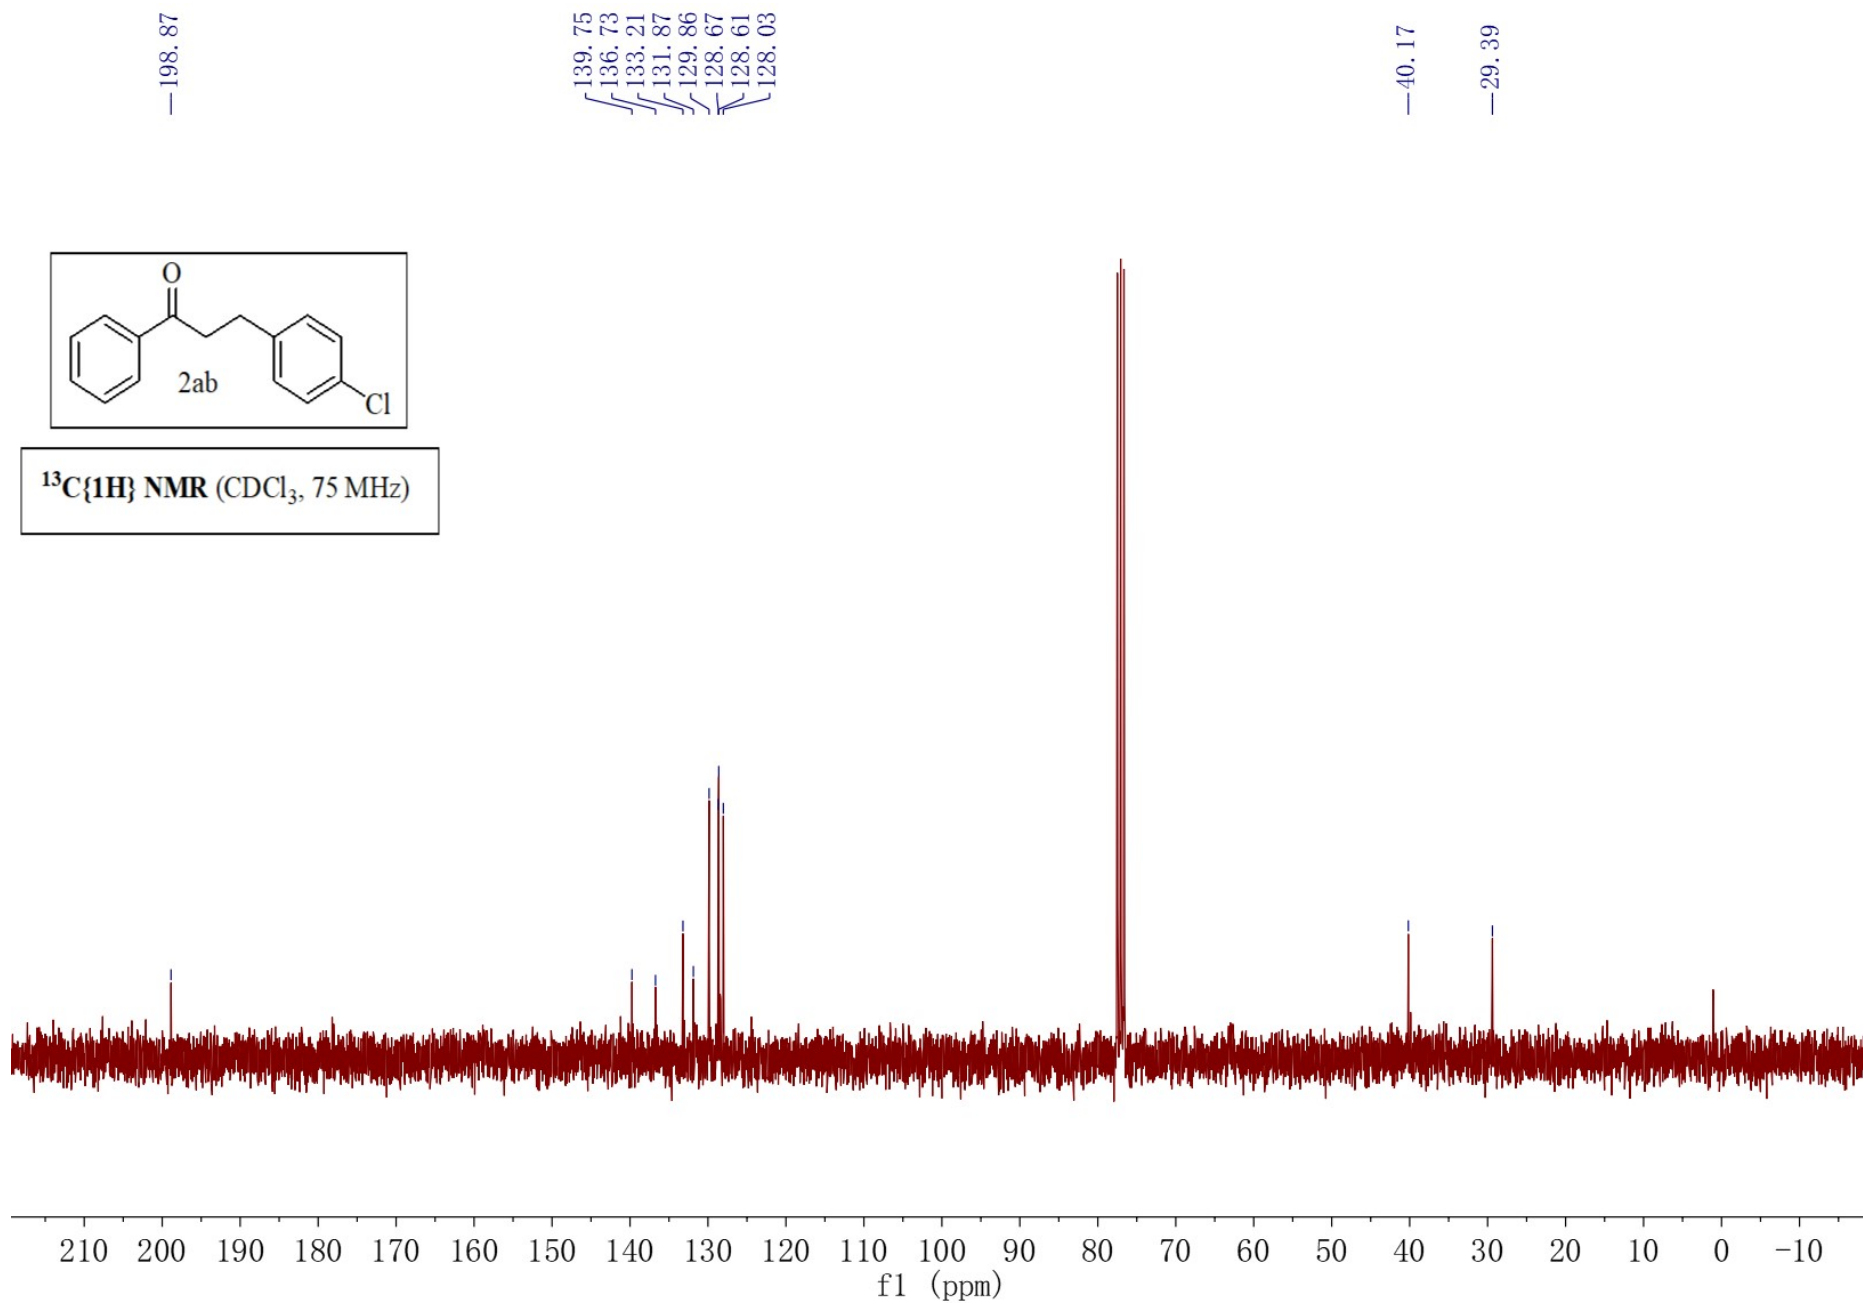

8.00  
7.98  
7.97  
7.60  
7.57  
7.51  
7.49  
7.46  
7.43  
7.18  
7.15

3.34  
3.31  
3.29  
3.09  
3.06  
3.04

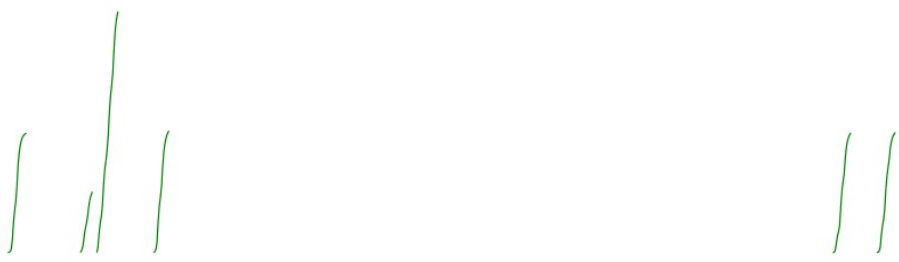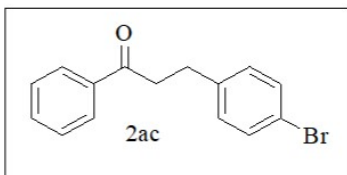

<sup>1</sup>H NMR (CDCl<sub>3</sub>, 300 MHz)

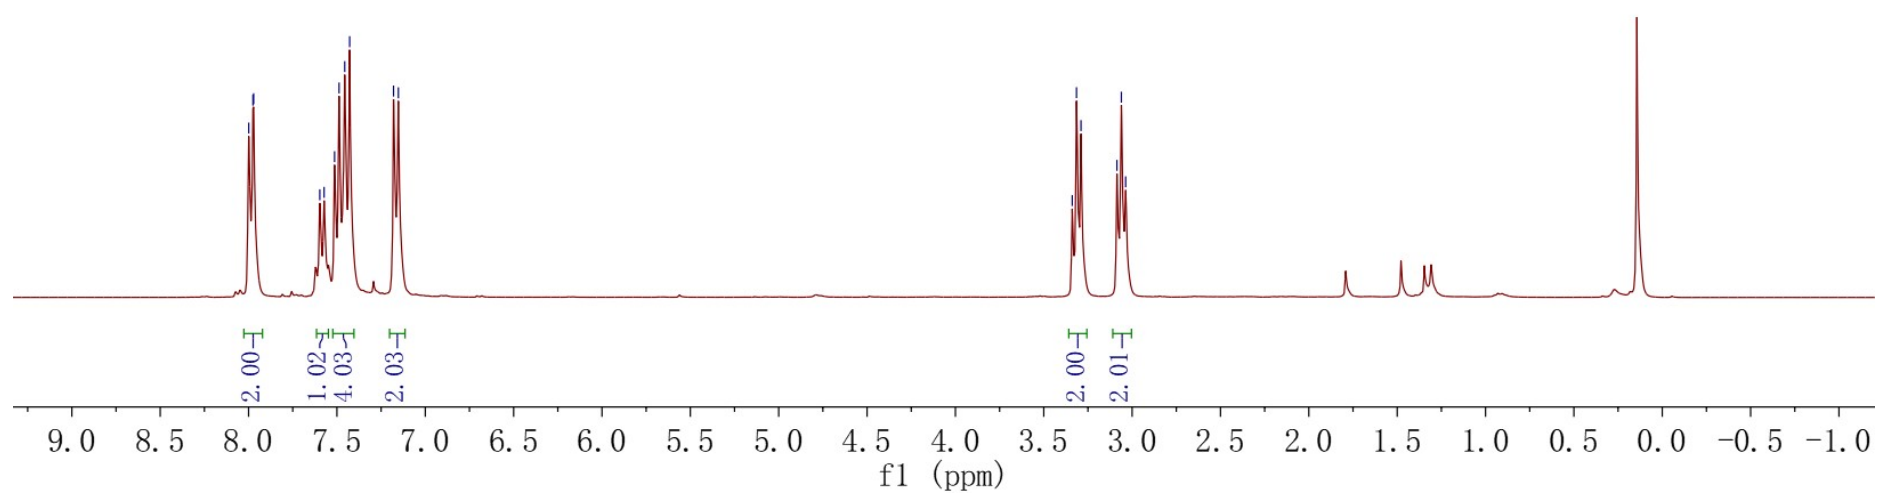

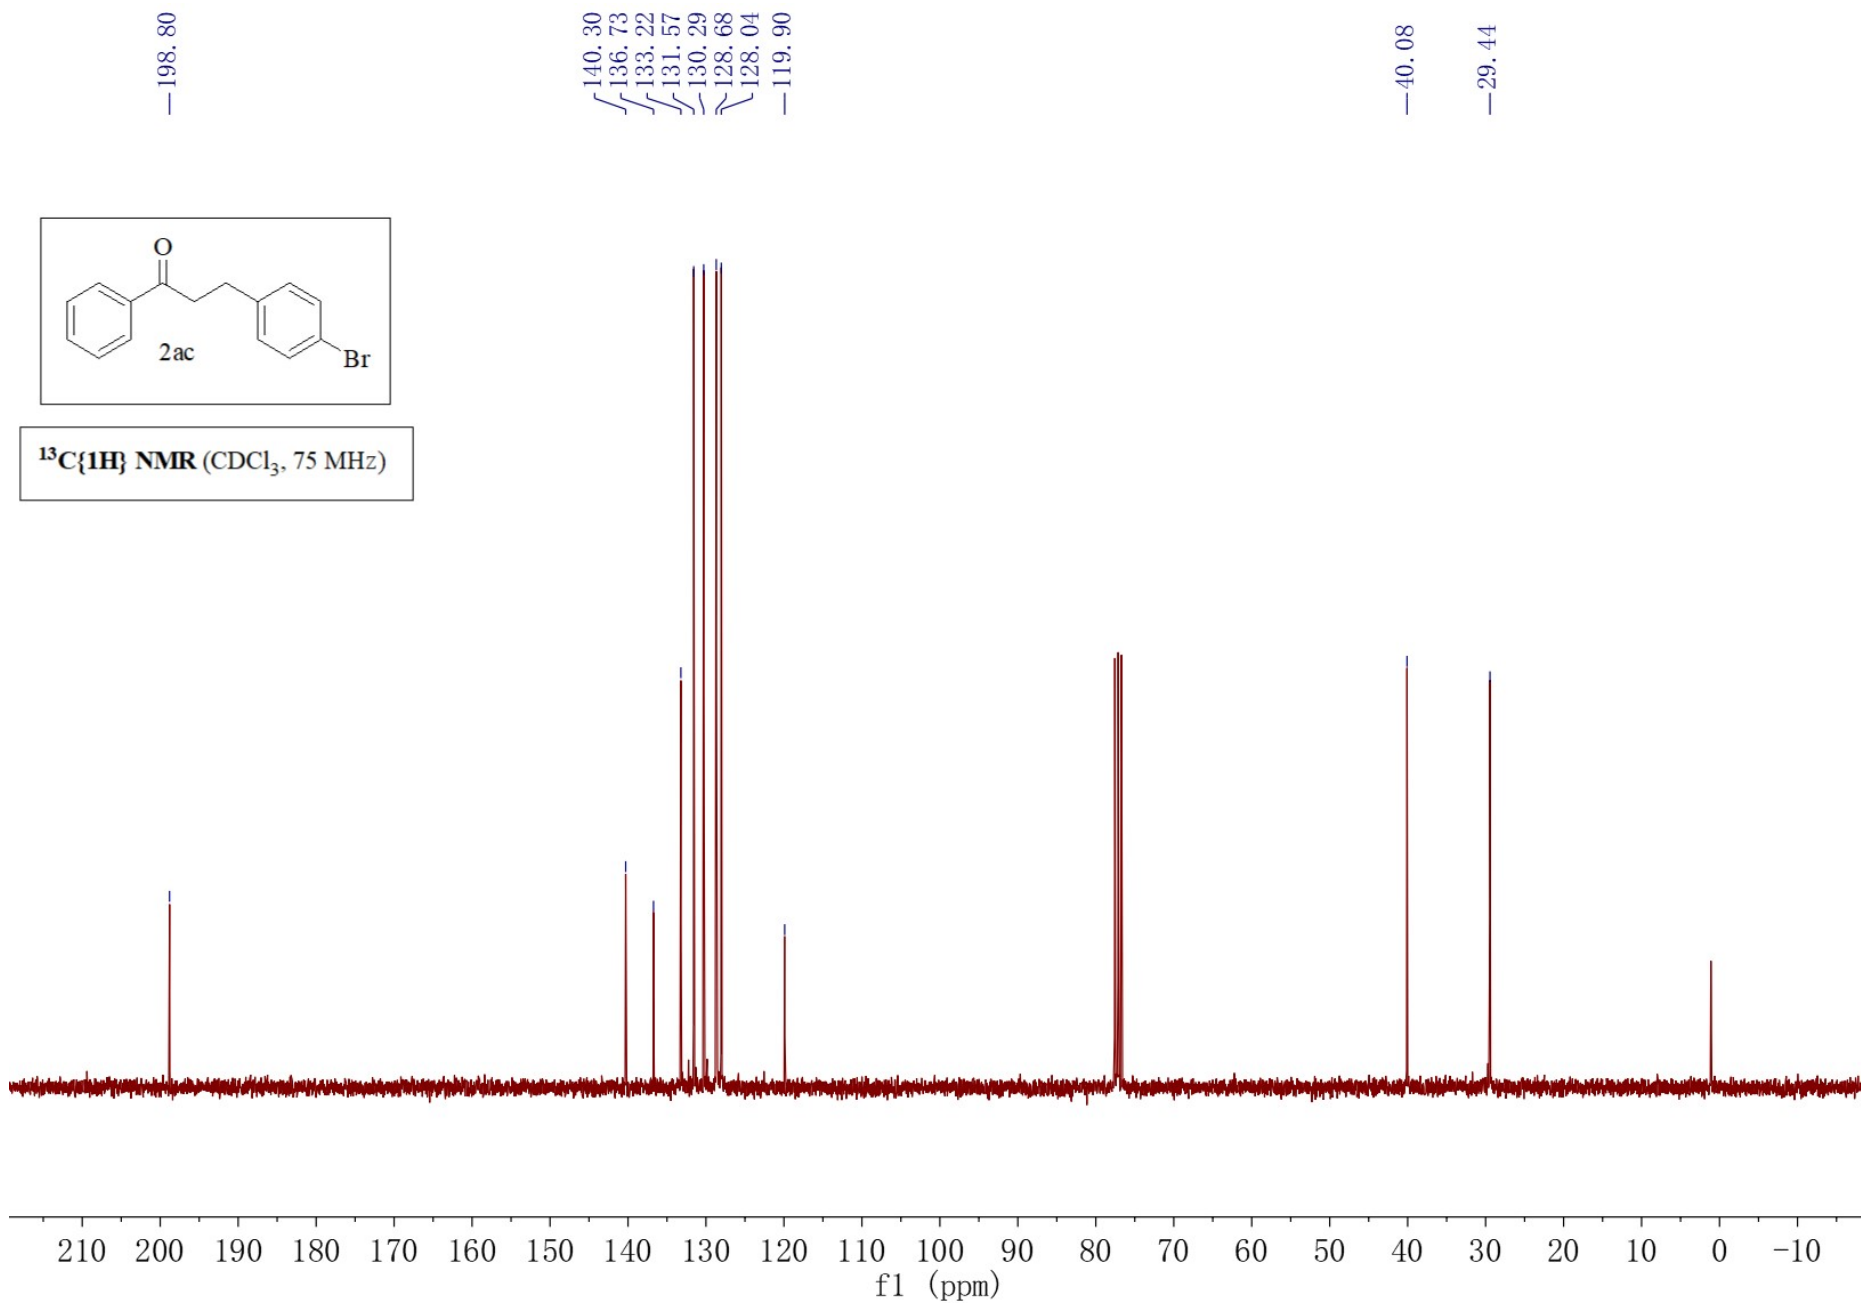

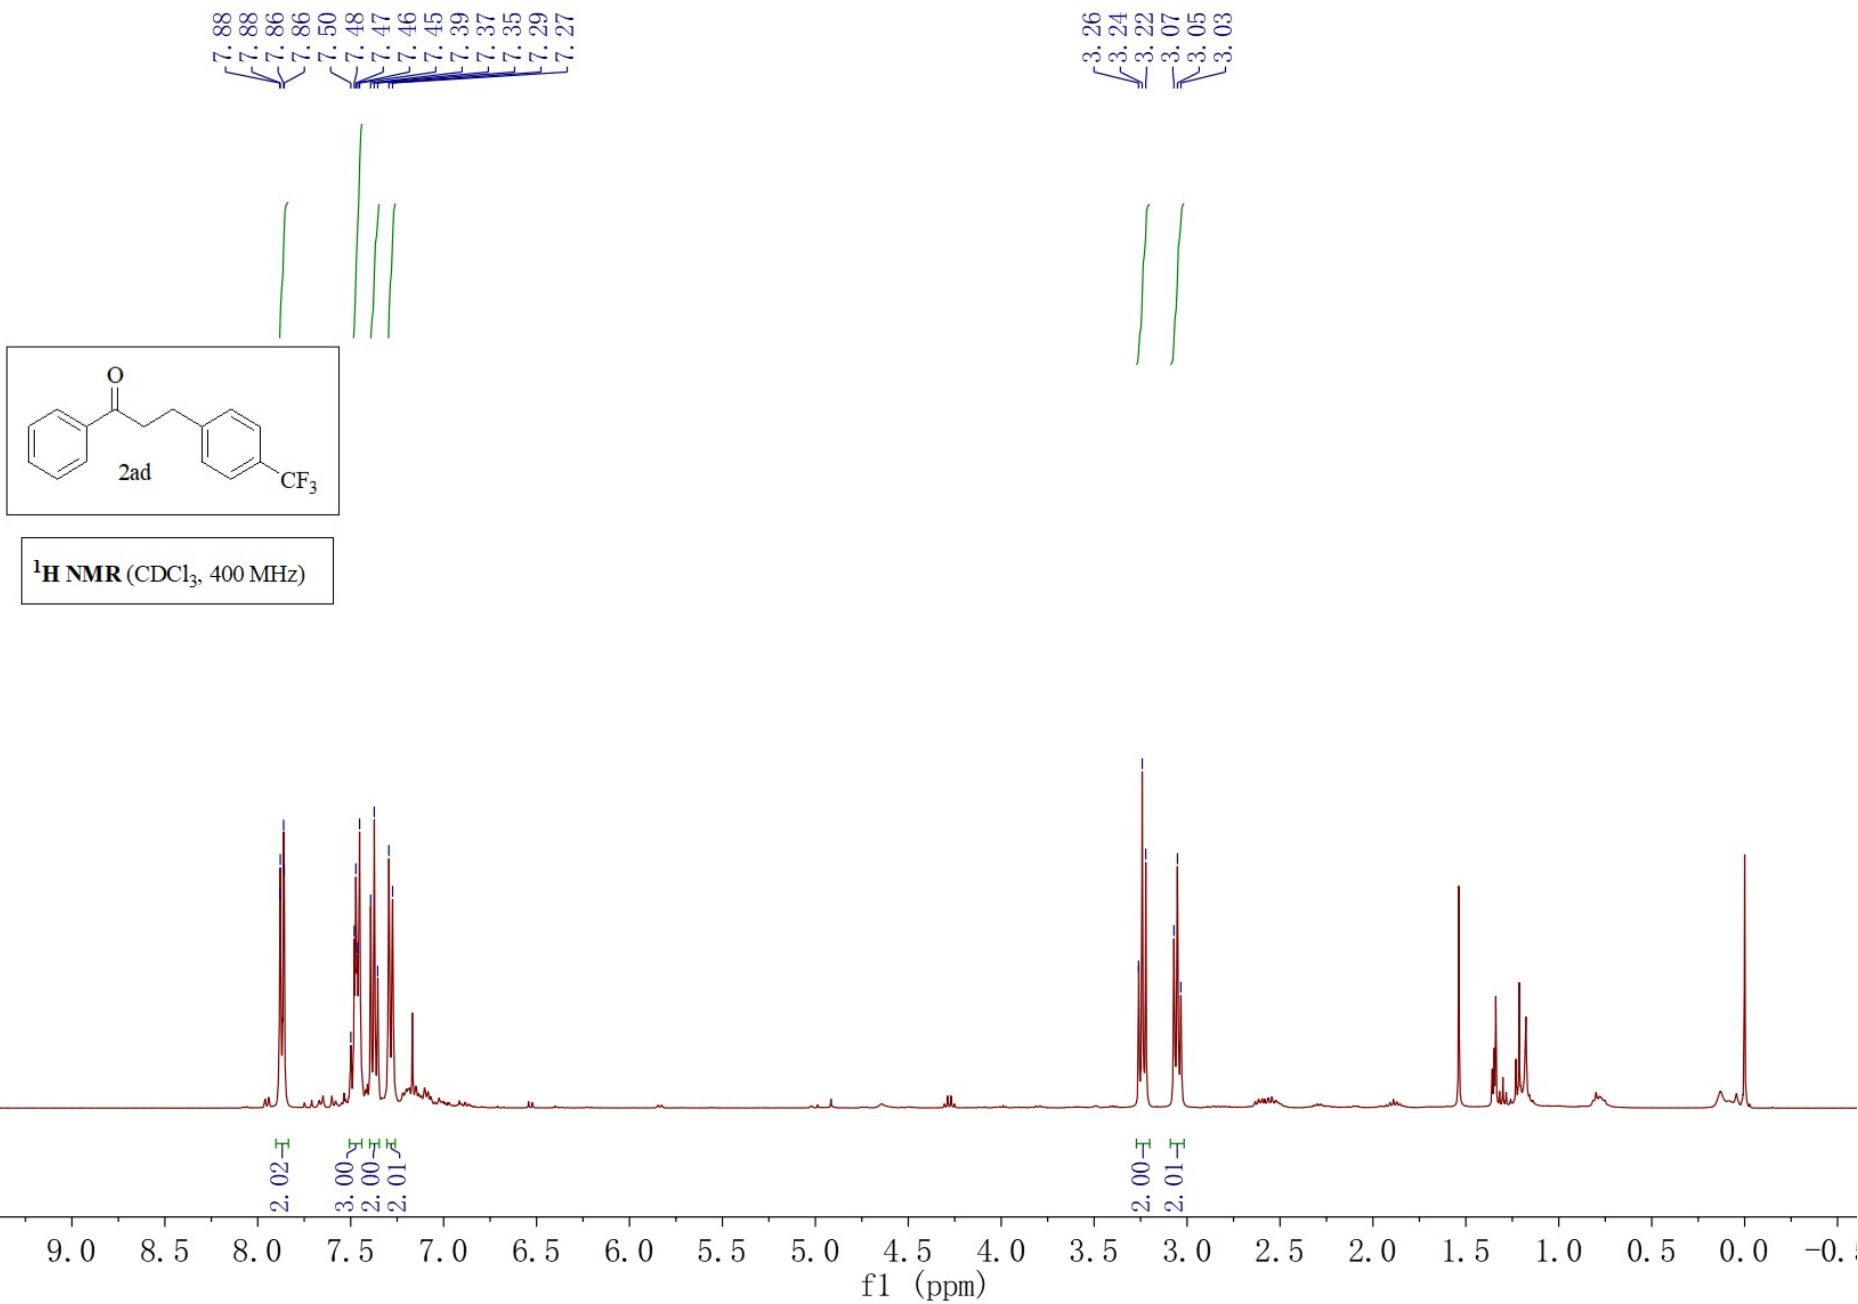

20240523 3.1.fid

197.64

144.42  
135.66  
132.21  
127.78  
127.64  
127.34  
127.02  
126.97  
124.61  
124.46  
124.42  
124.38  
124.34  
121.90  
119.21

38.80

28.75

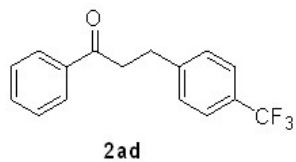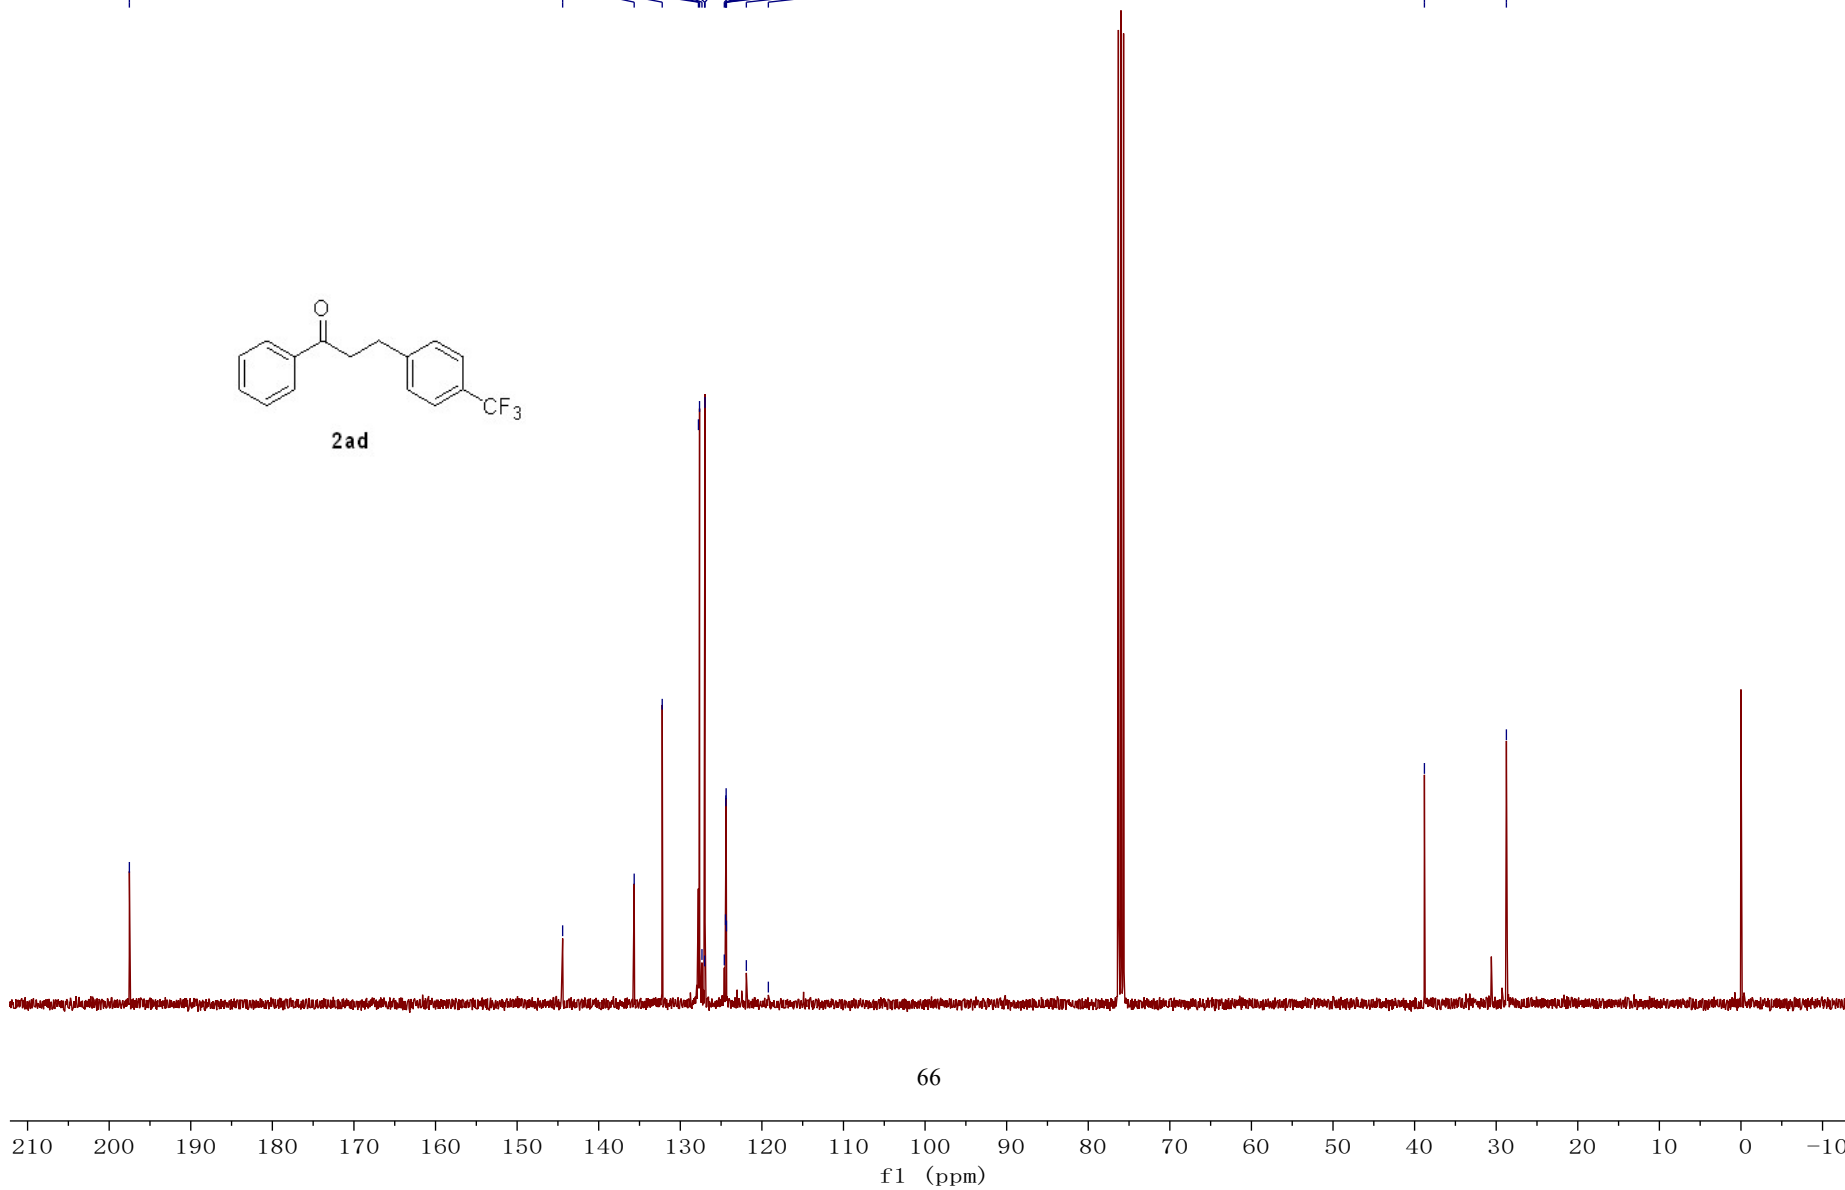

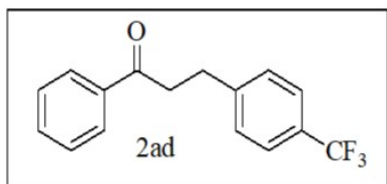

**<sup>19</sup>F NMR** (CDCl<sub>3</sub>, 282 MHz)

-62.33

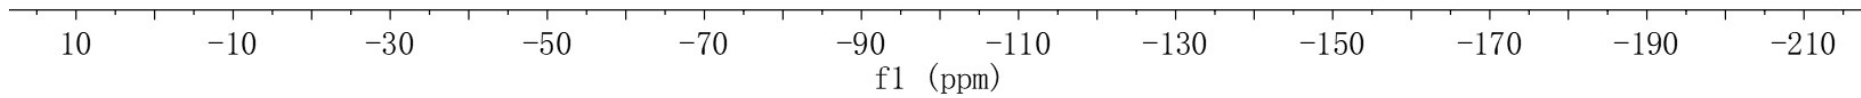

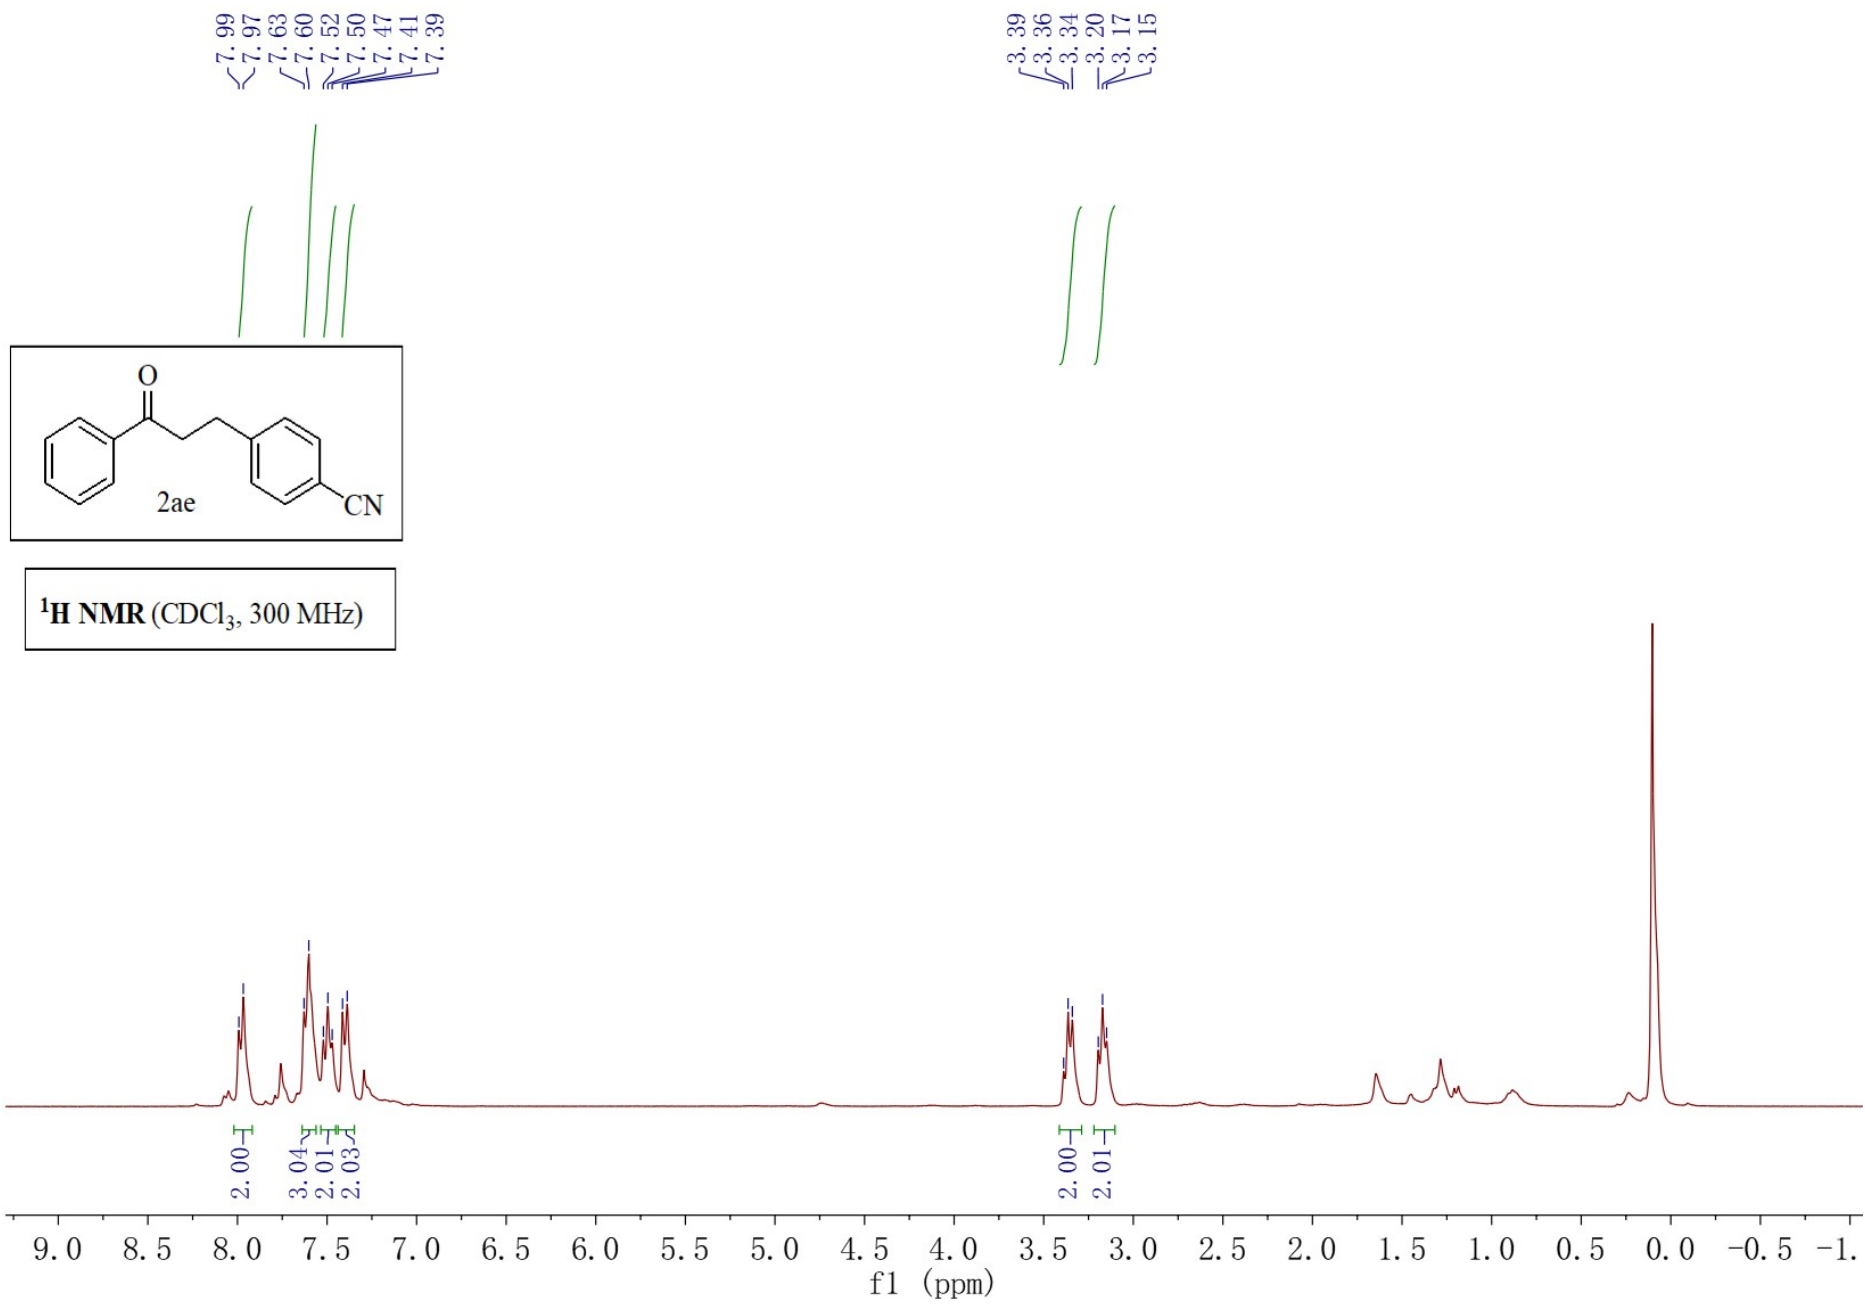



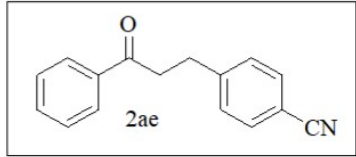

$^{13}\text{C}\{^1\text{H}\}$  NMR ( $\text{CDCl}_3$ , 75 MHz)

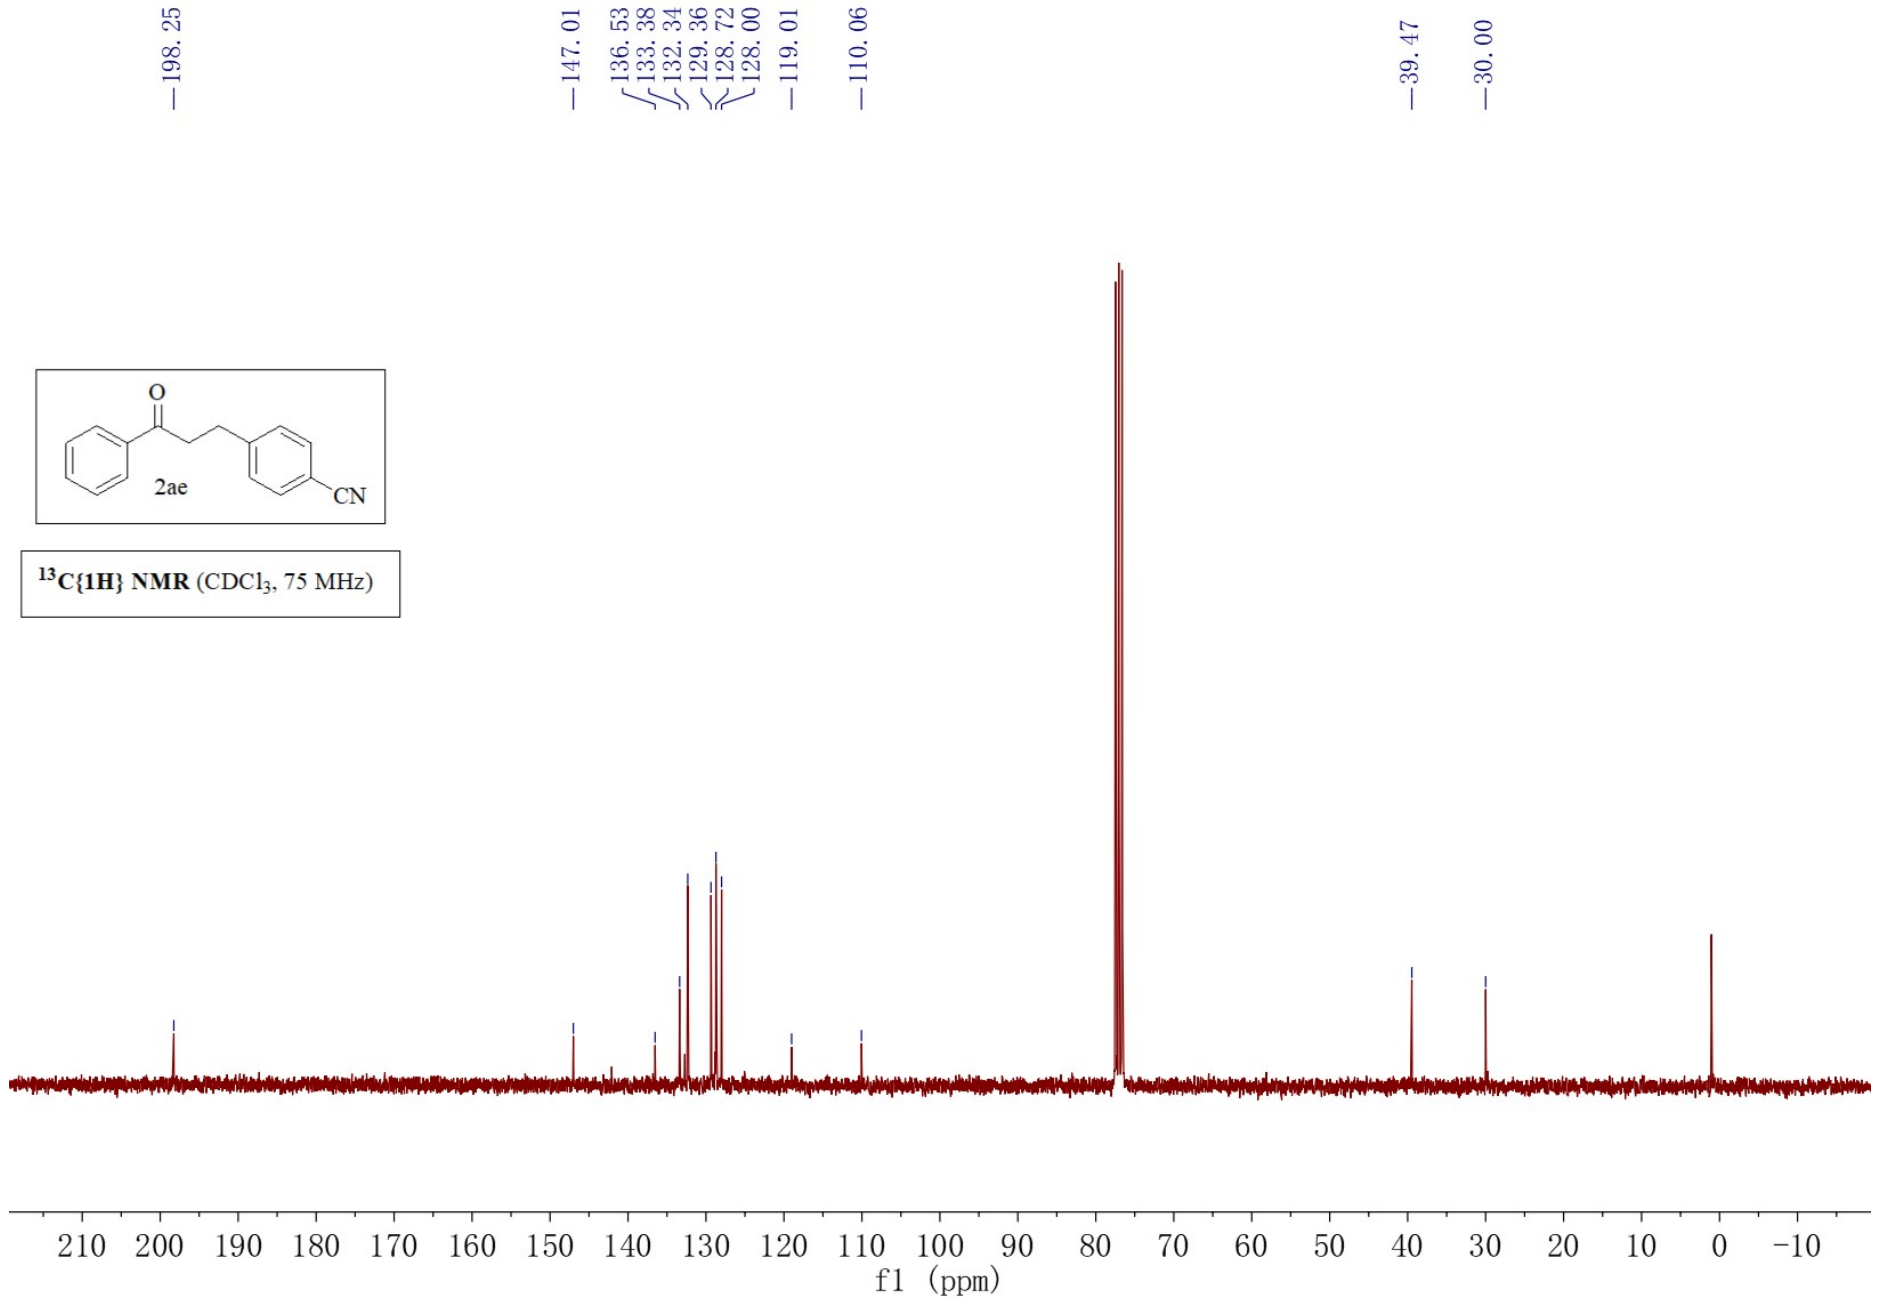

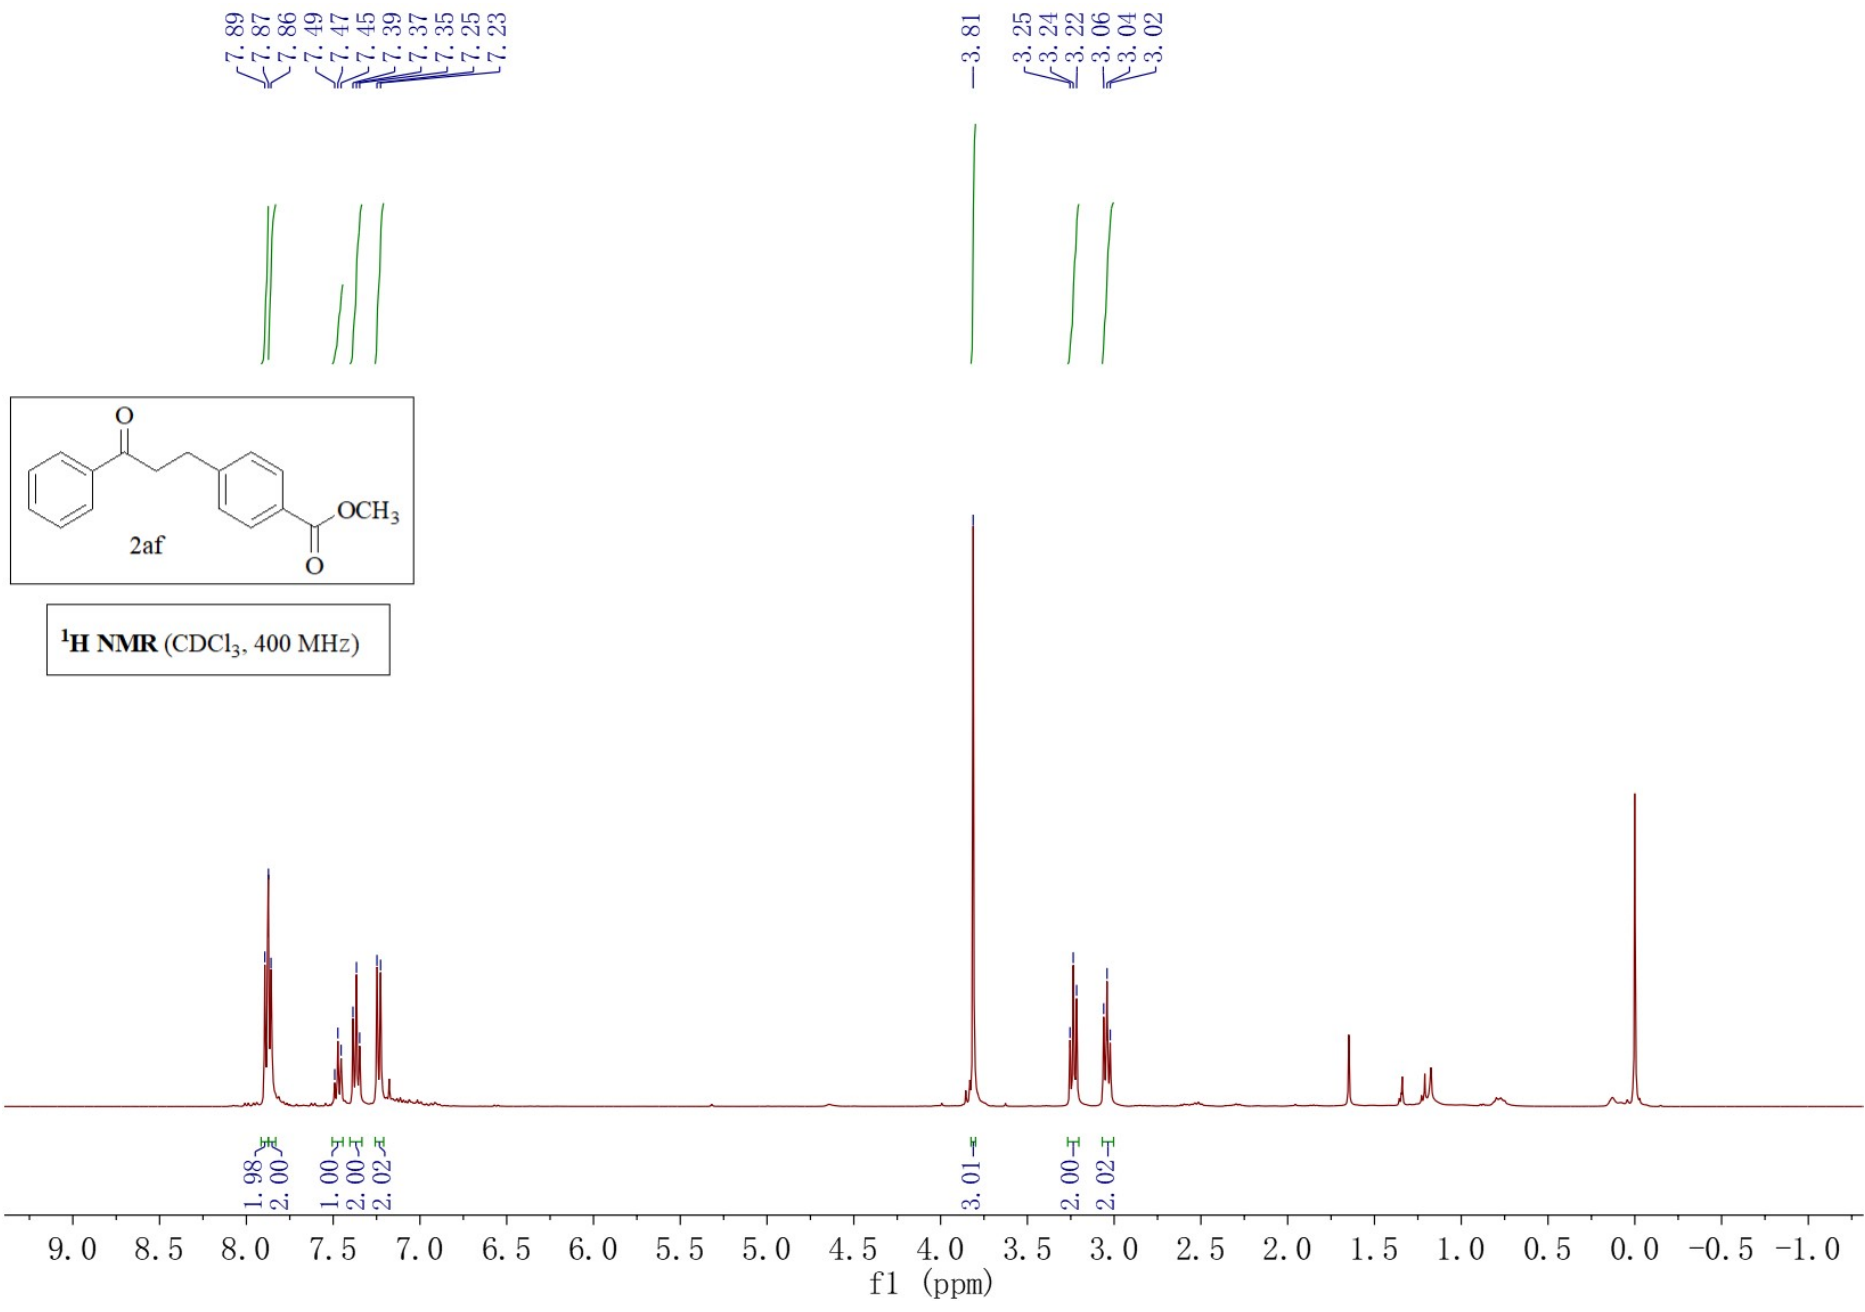

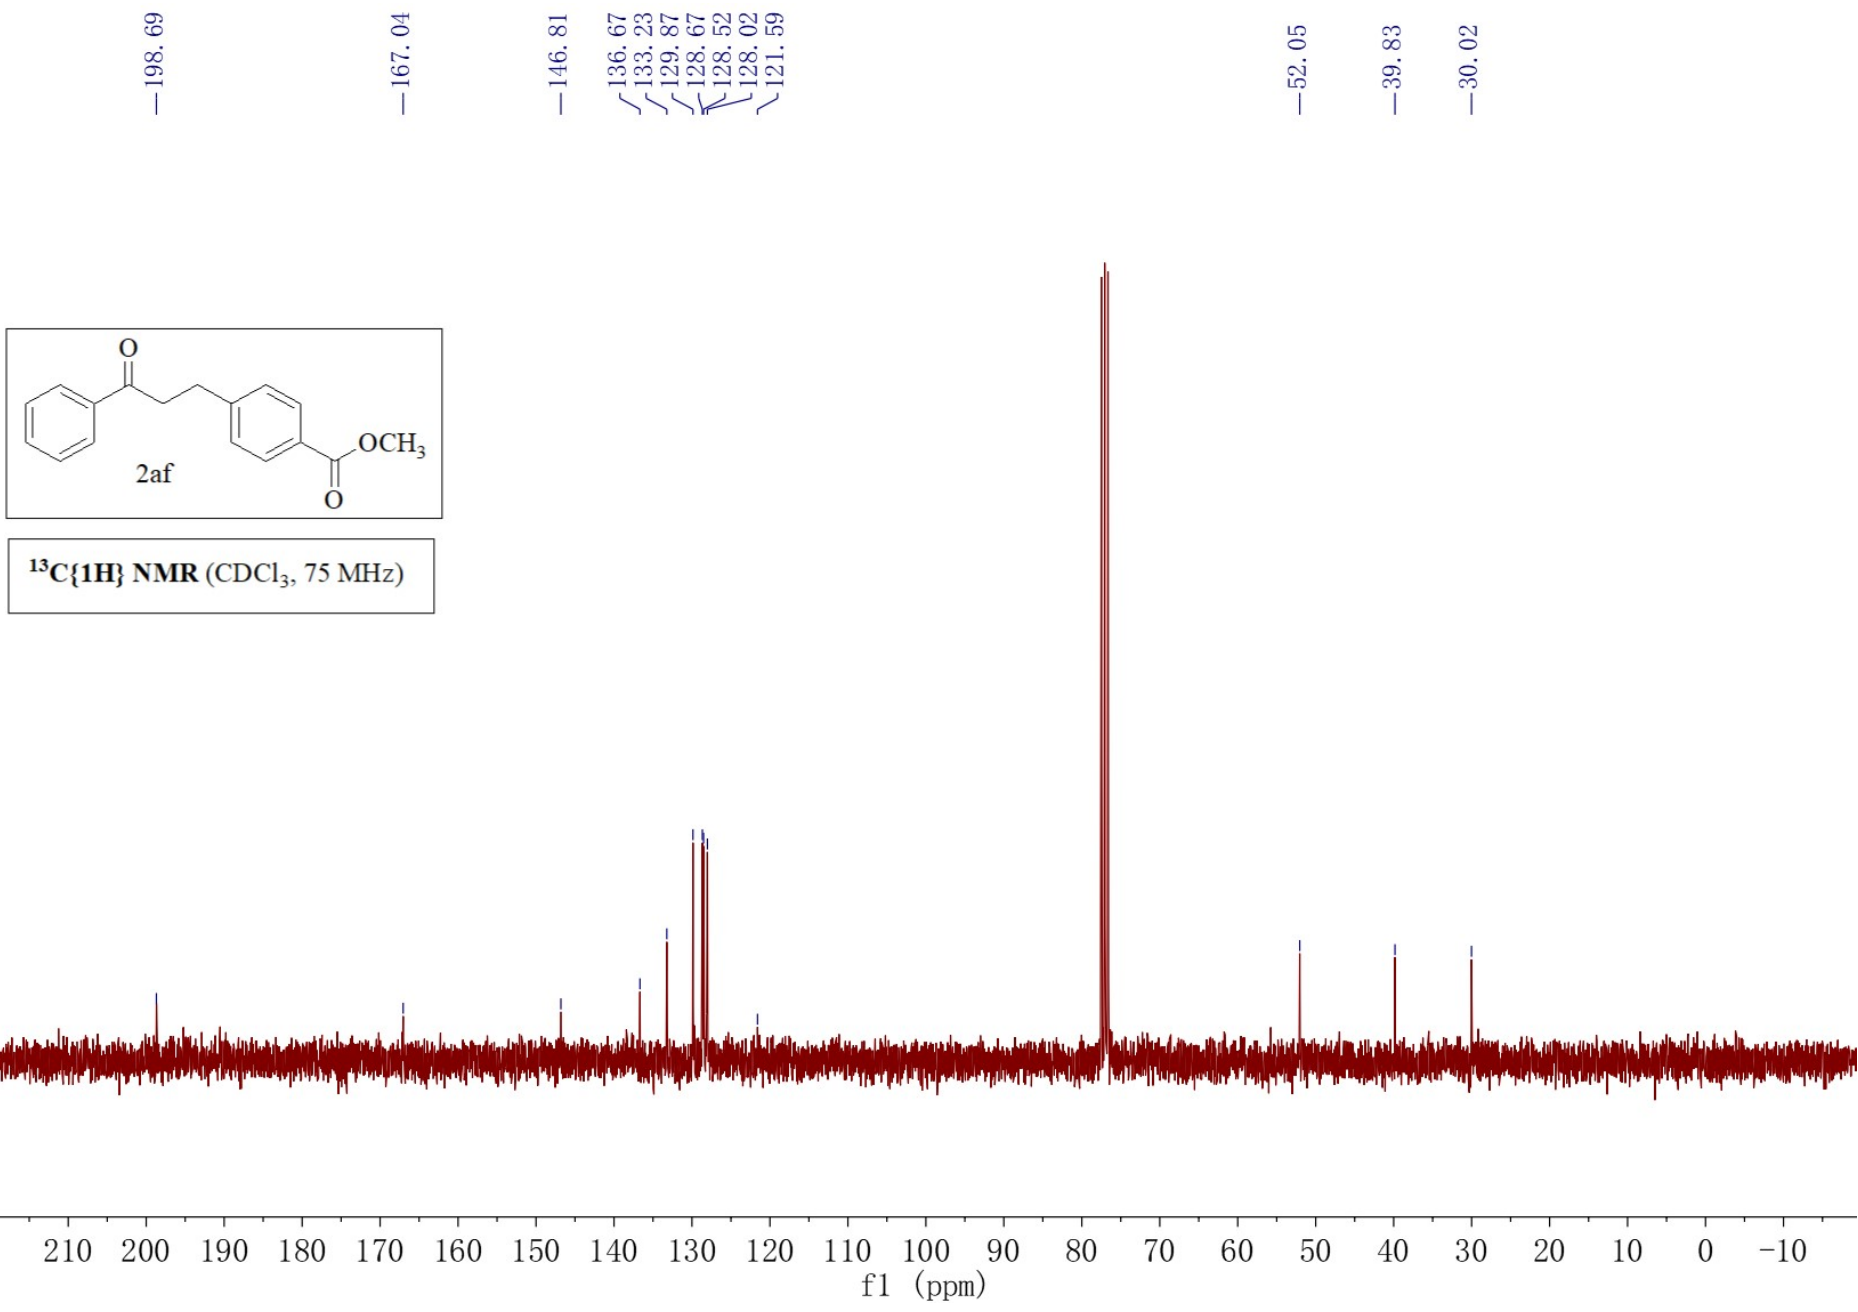

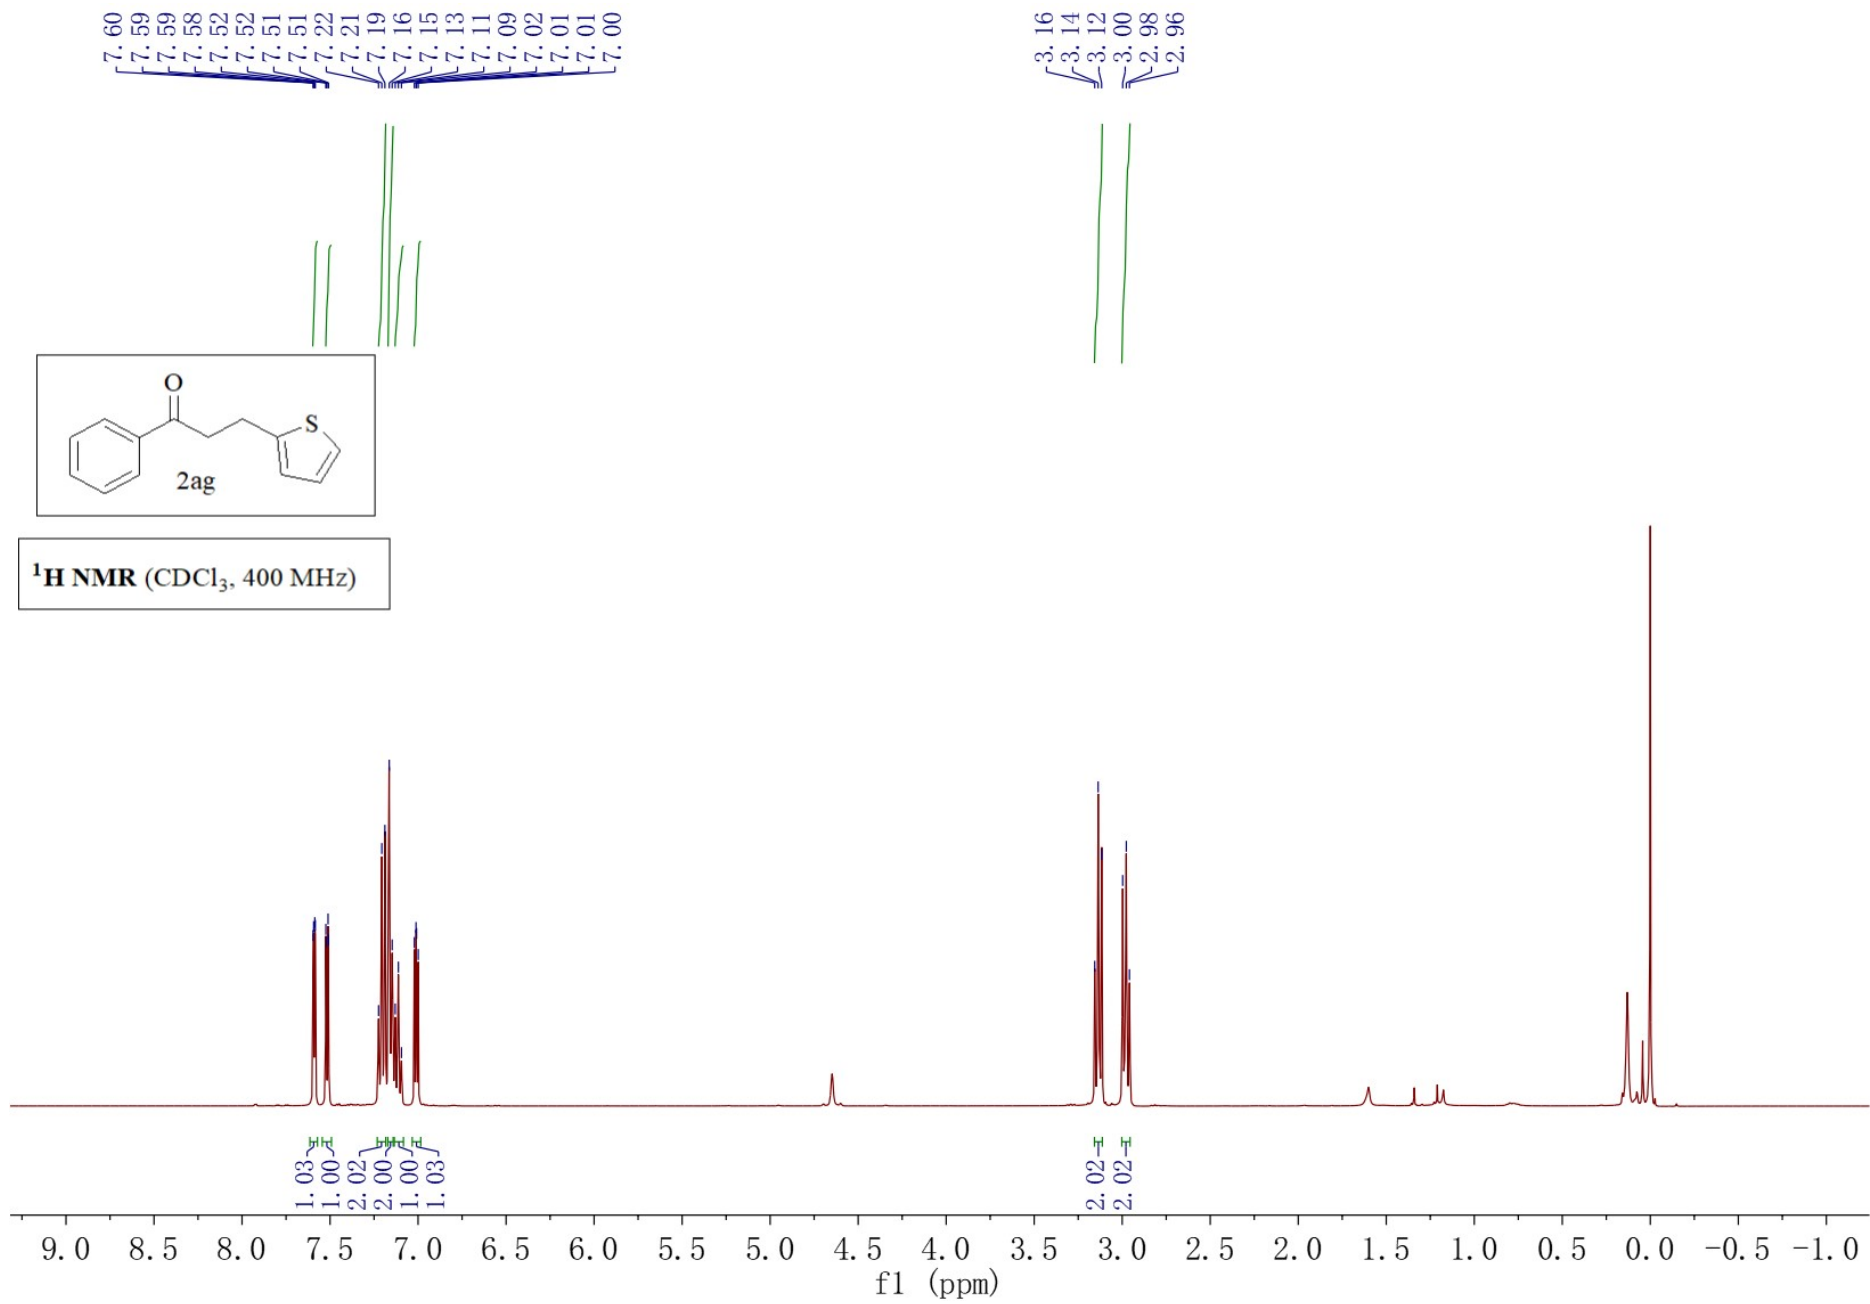

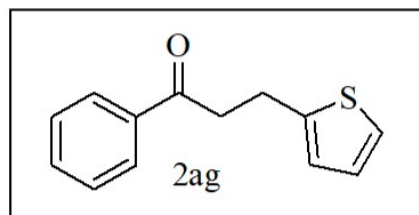

$^{13}\text{C}\{^1\text{H}\}$  NMR ( $\text{CDCl}_3$ , 75 MHz)

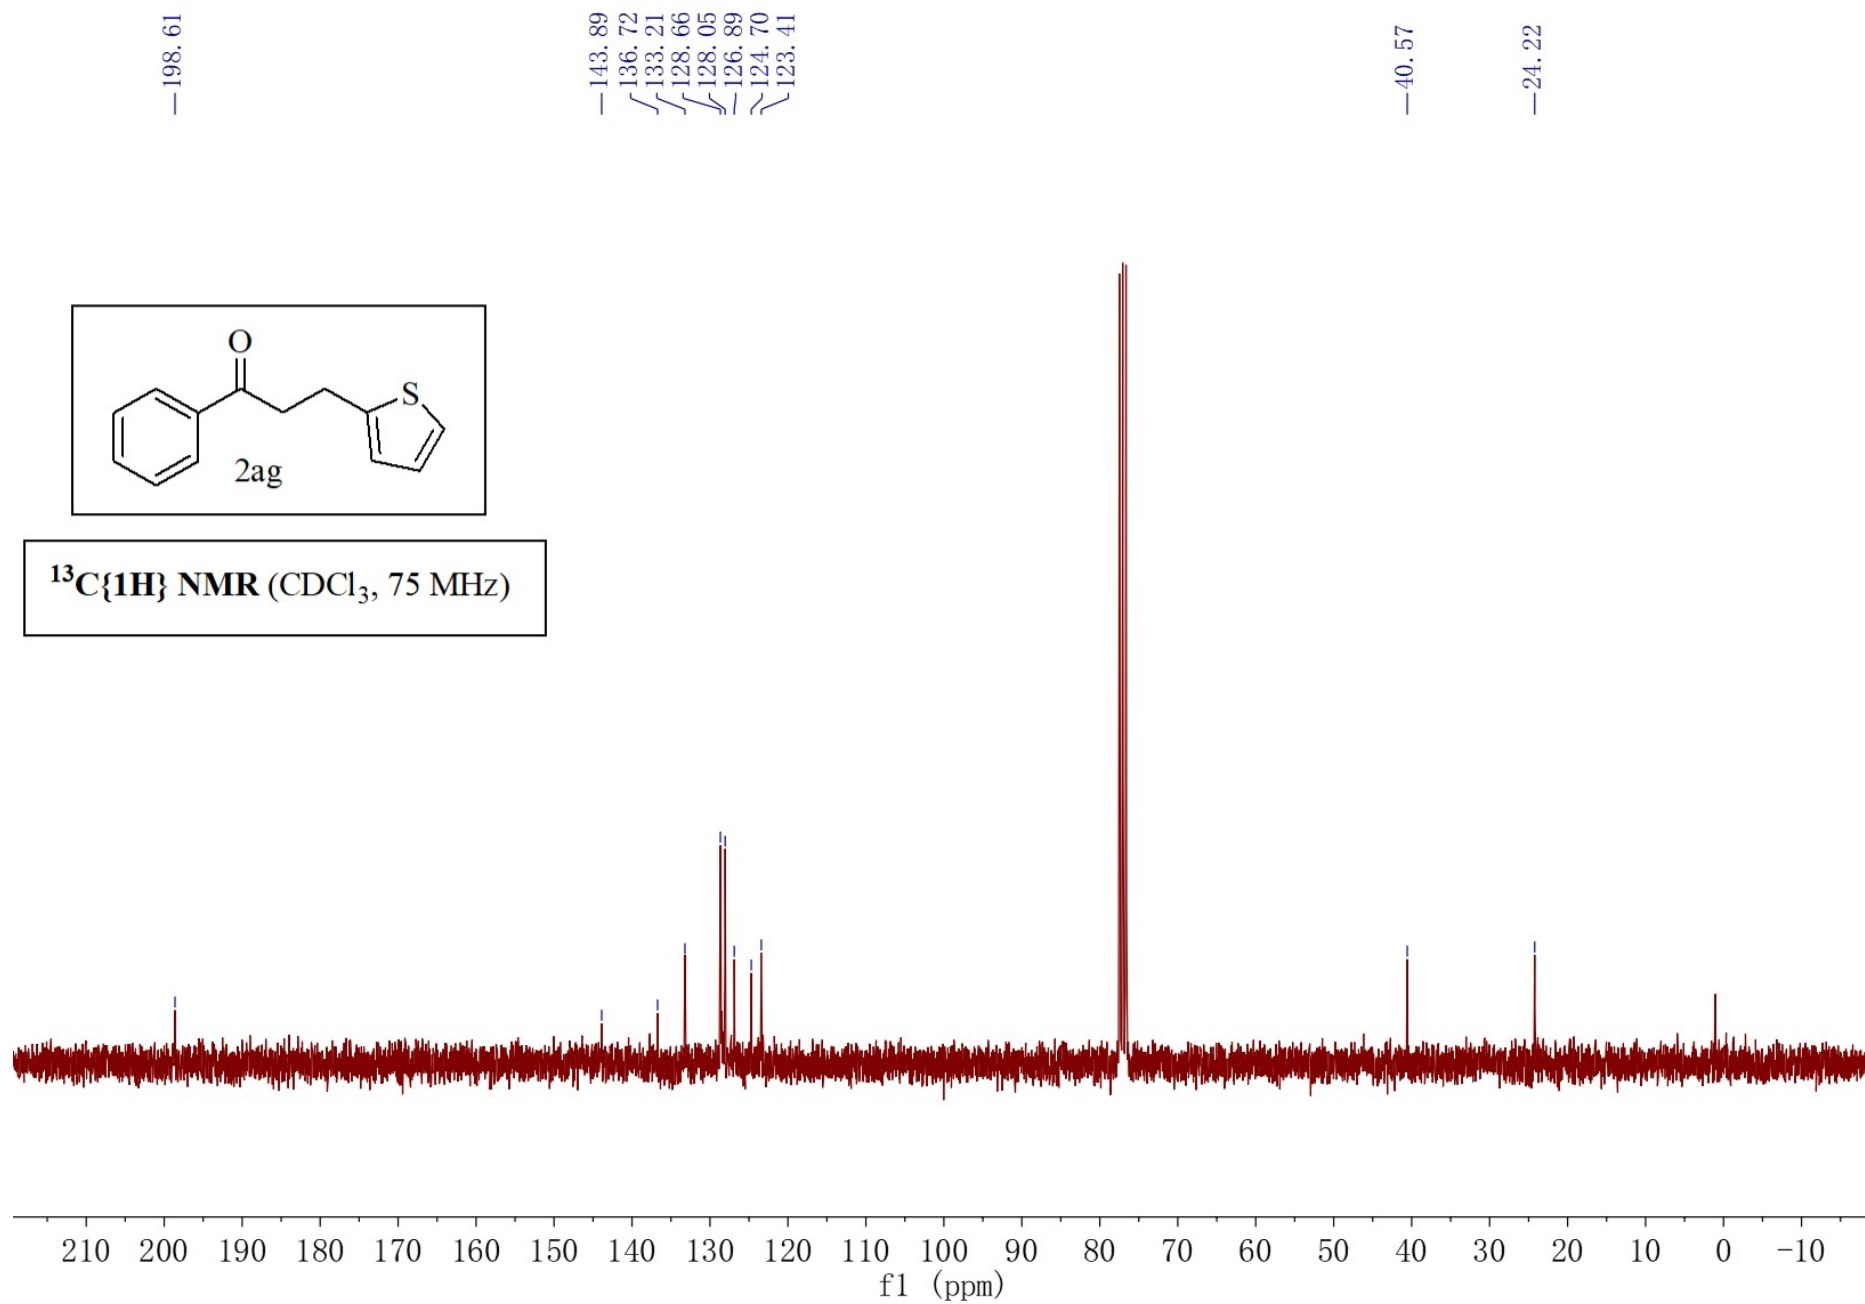

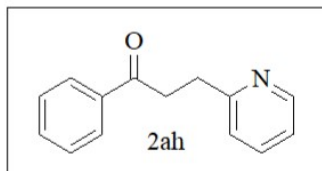

<sup>1</sup>H NMR (CDCl<sub>3</sub>, 300 MHz)

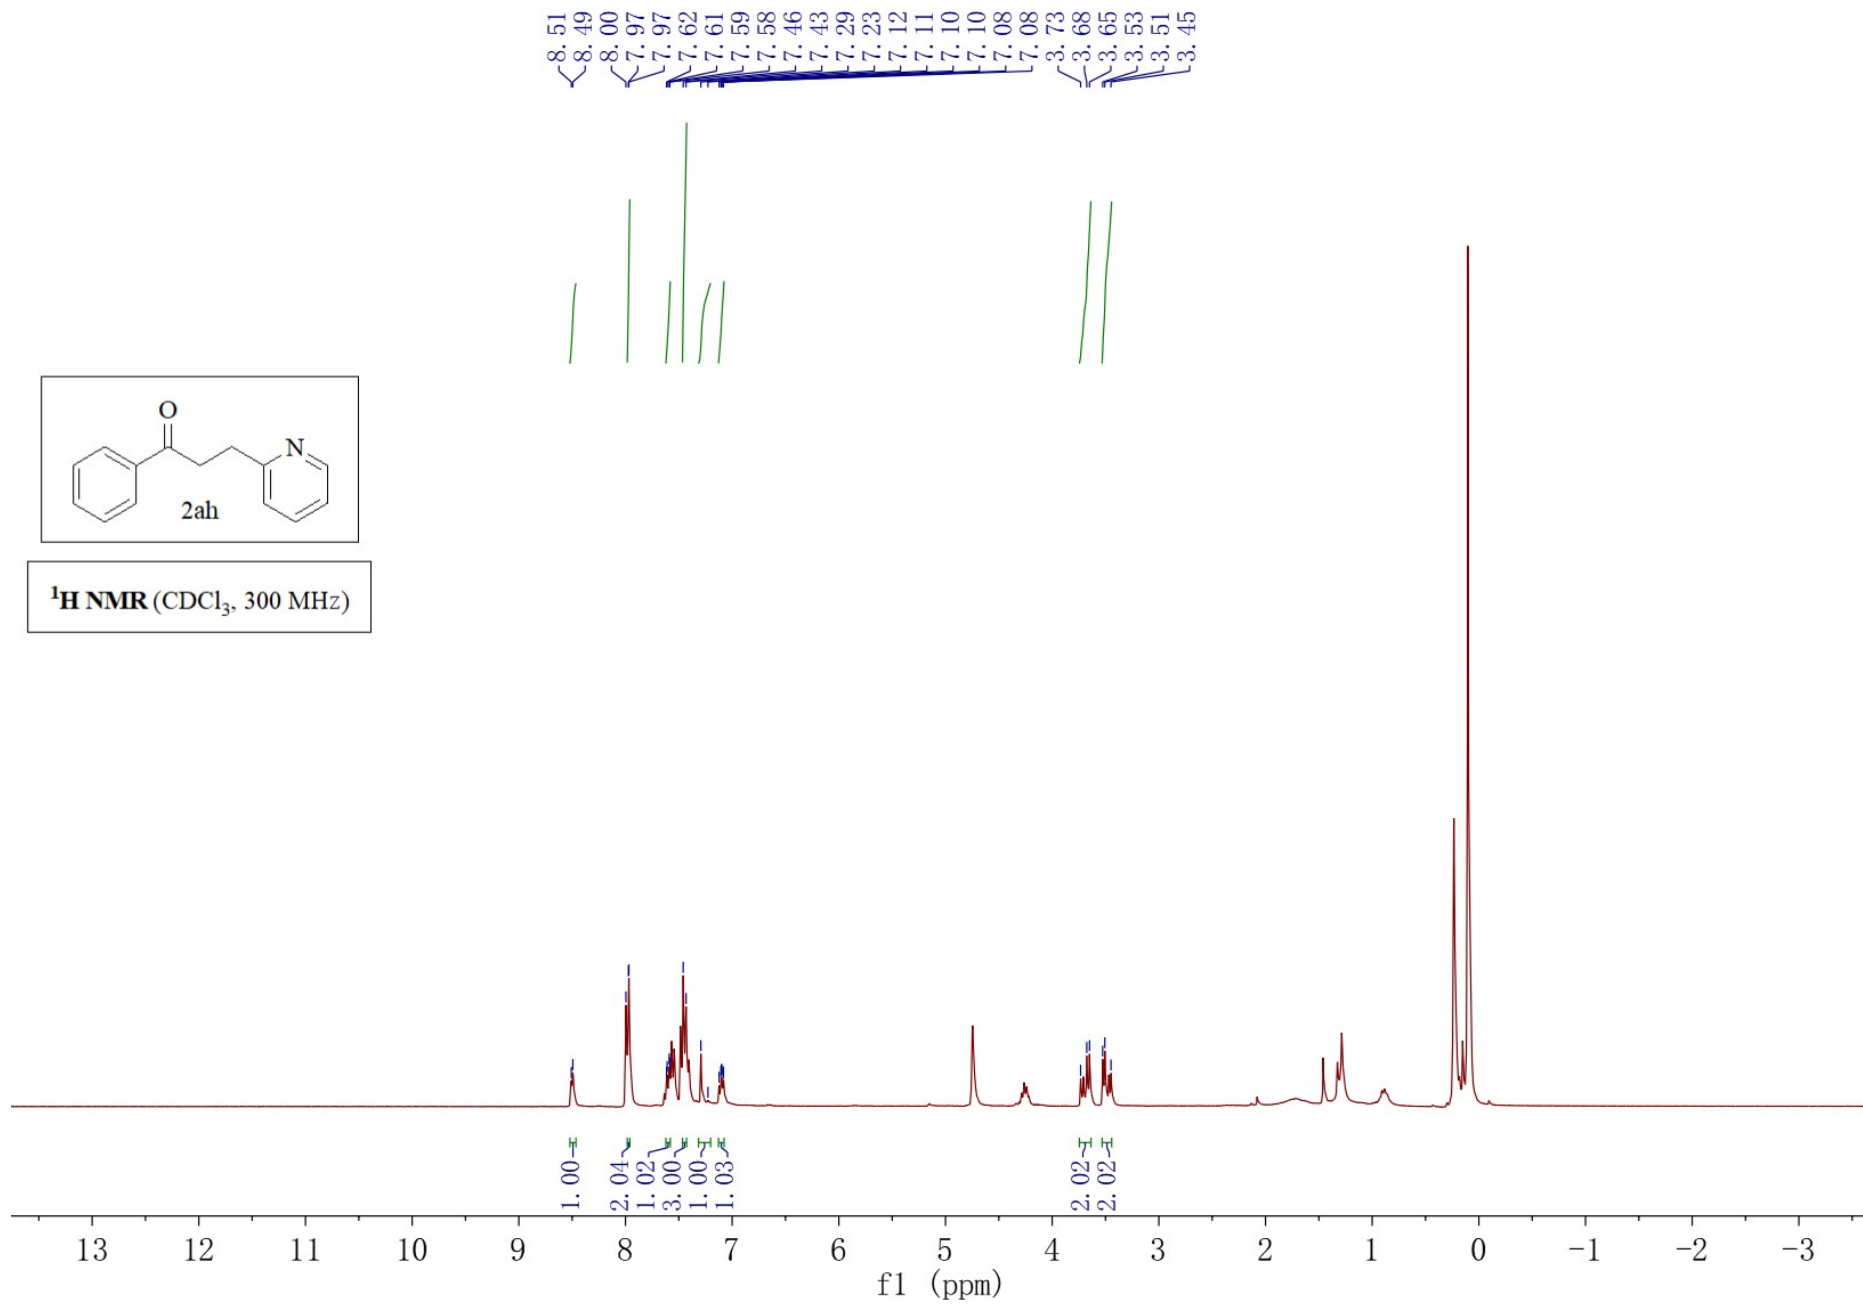

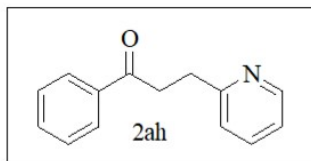

$^{13}\text{C}\{^1\text{H}\}$  NMR ( $\text{CDCl}_3$ , 75 MHz)

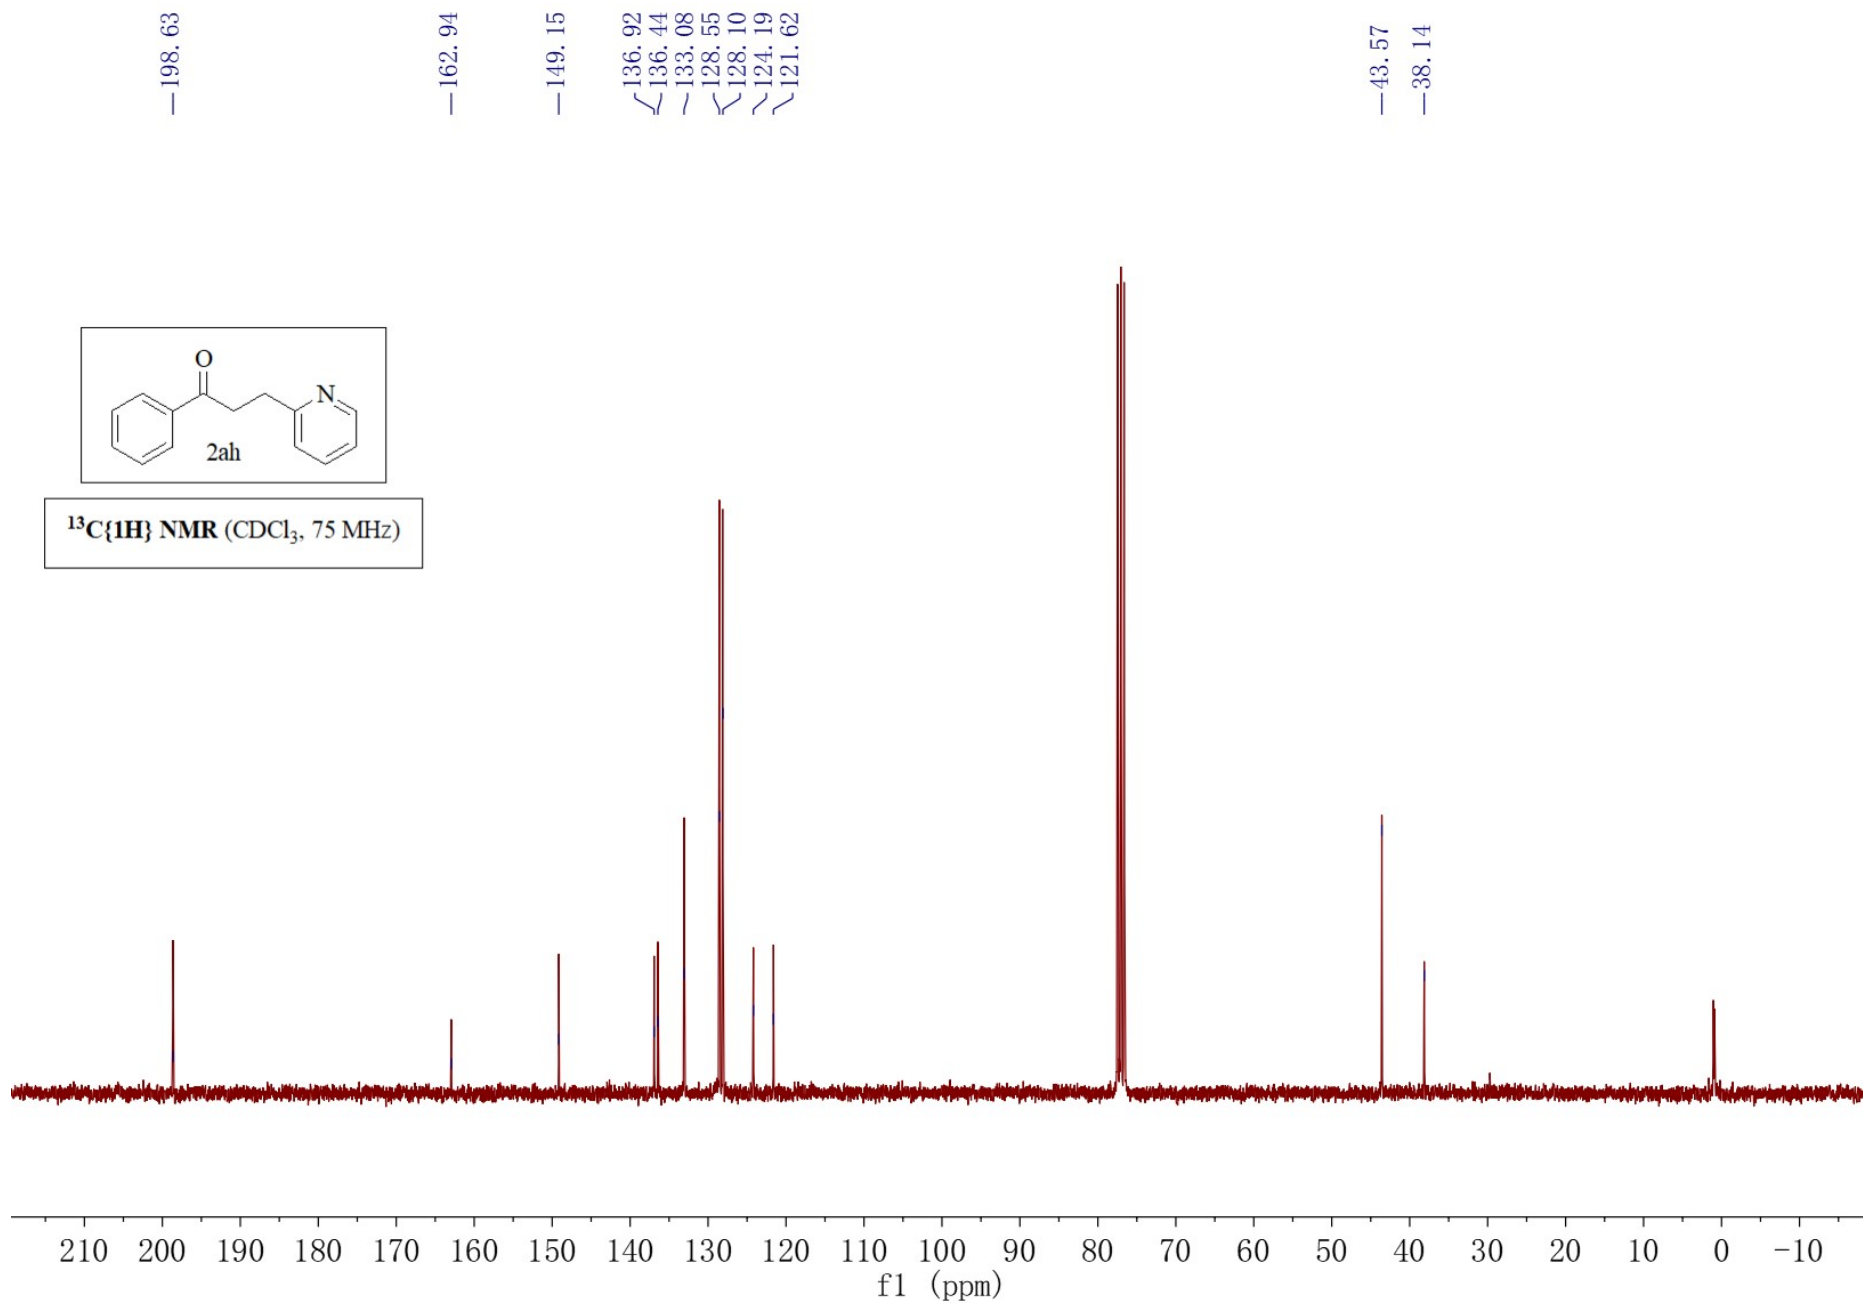

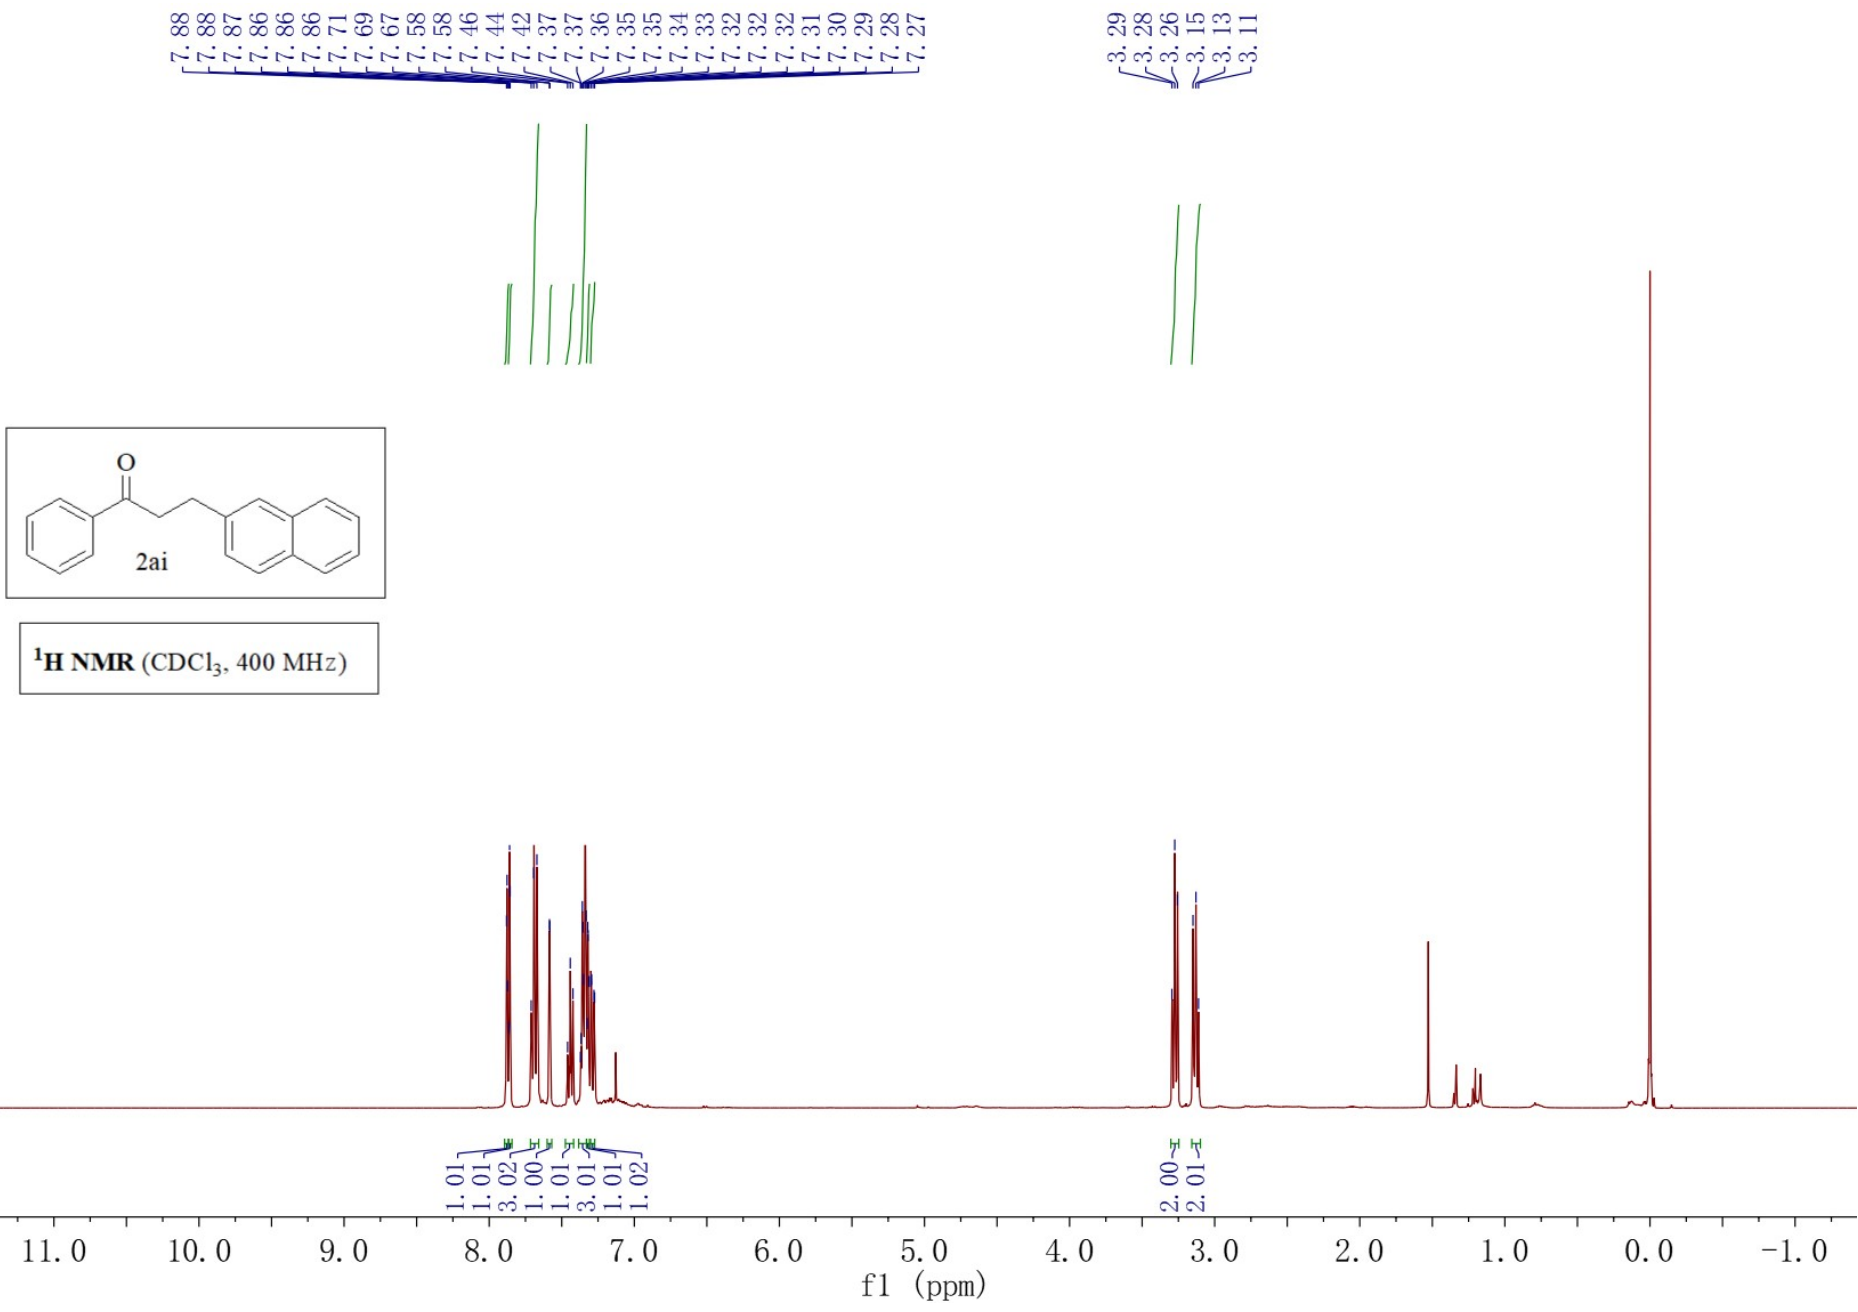



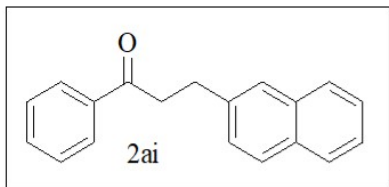

$^{13}\text{C}\{^1\text{H}\}$  NMR ( $\text{CDCl}_3$ , 75 MHz)

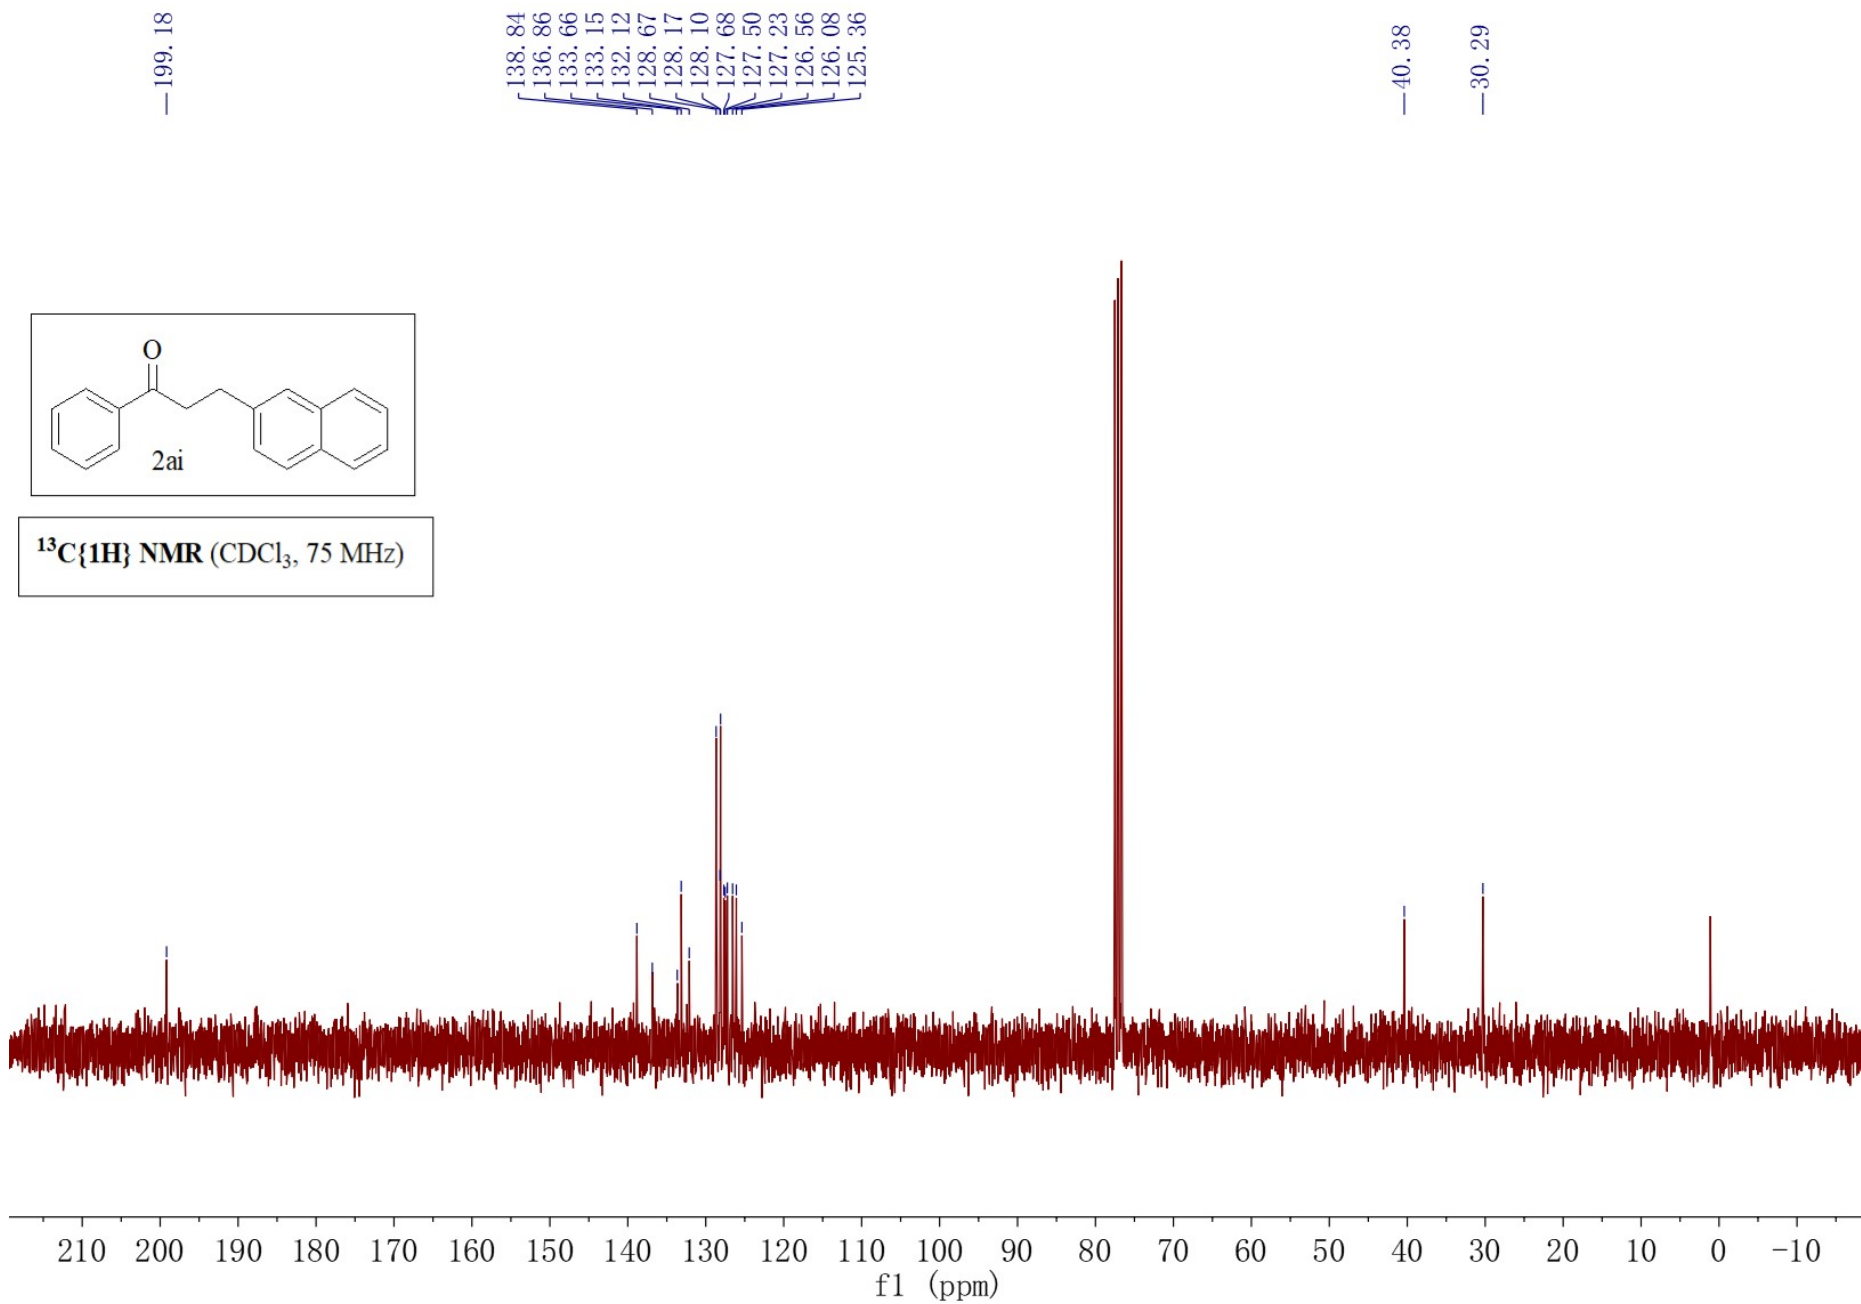

8.41  
8.39  
8.34  
8.32  
8.08  
8.06  
8.01  
7.99  
7.58  
7.58  
7.55  
7.53  
7.50  
7.49  
7.46

4.17  
4.14  
4.12  
3.53  
3.50  
3.47

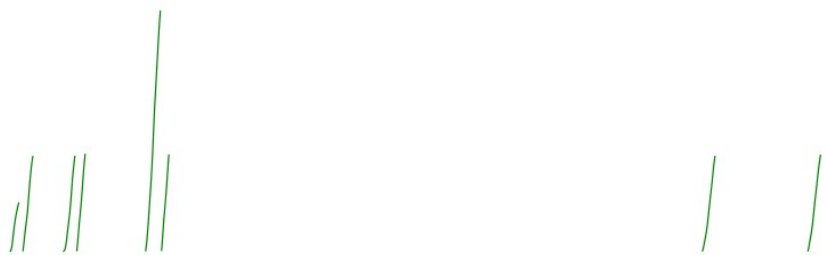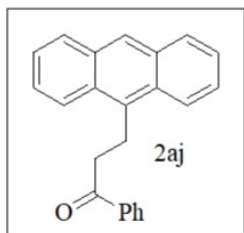

$^1\text{H}$  NMR ( $\text{CDCl}_3$ , 300 MHz)

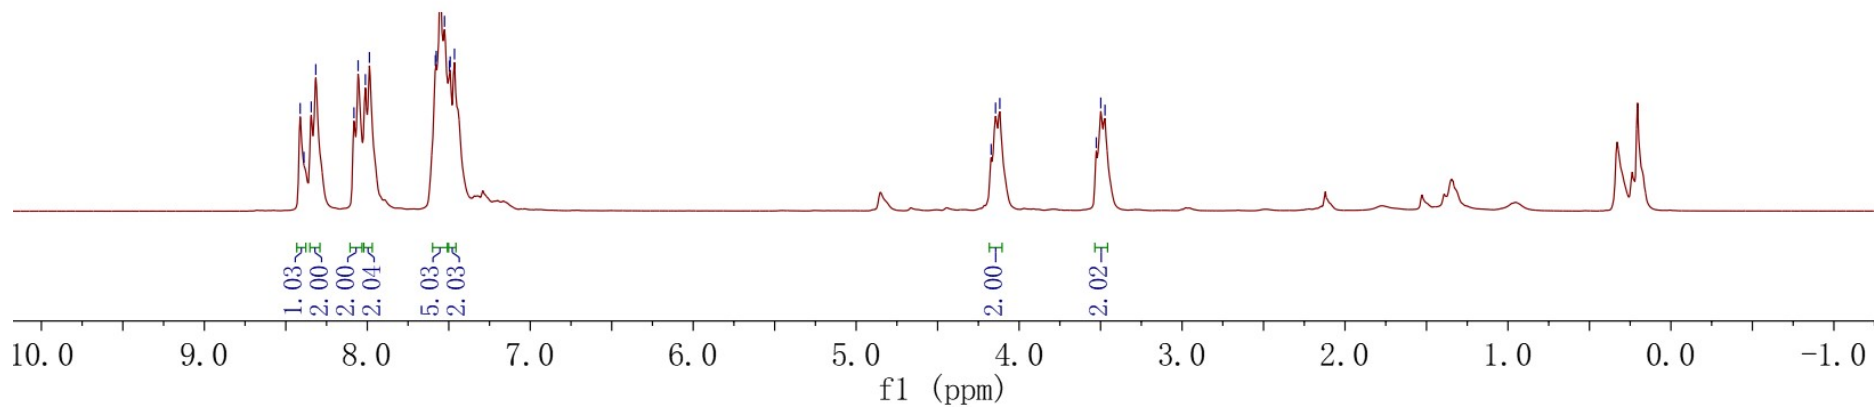

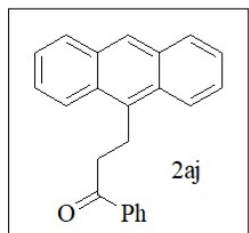

$^{13}\text{C}\{^1\text{H}\}$  NMR ( $\text{CDCl}_3$ , 75 MHz)

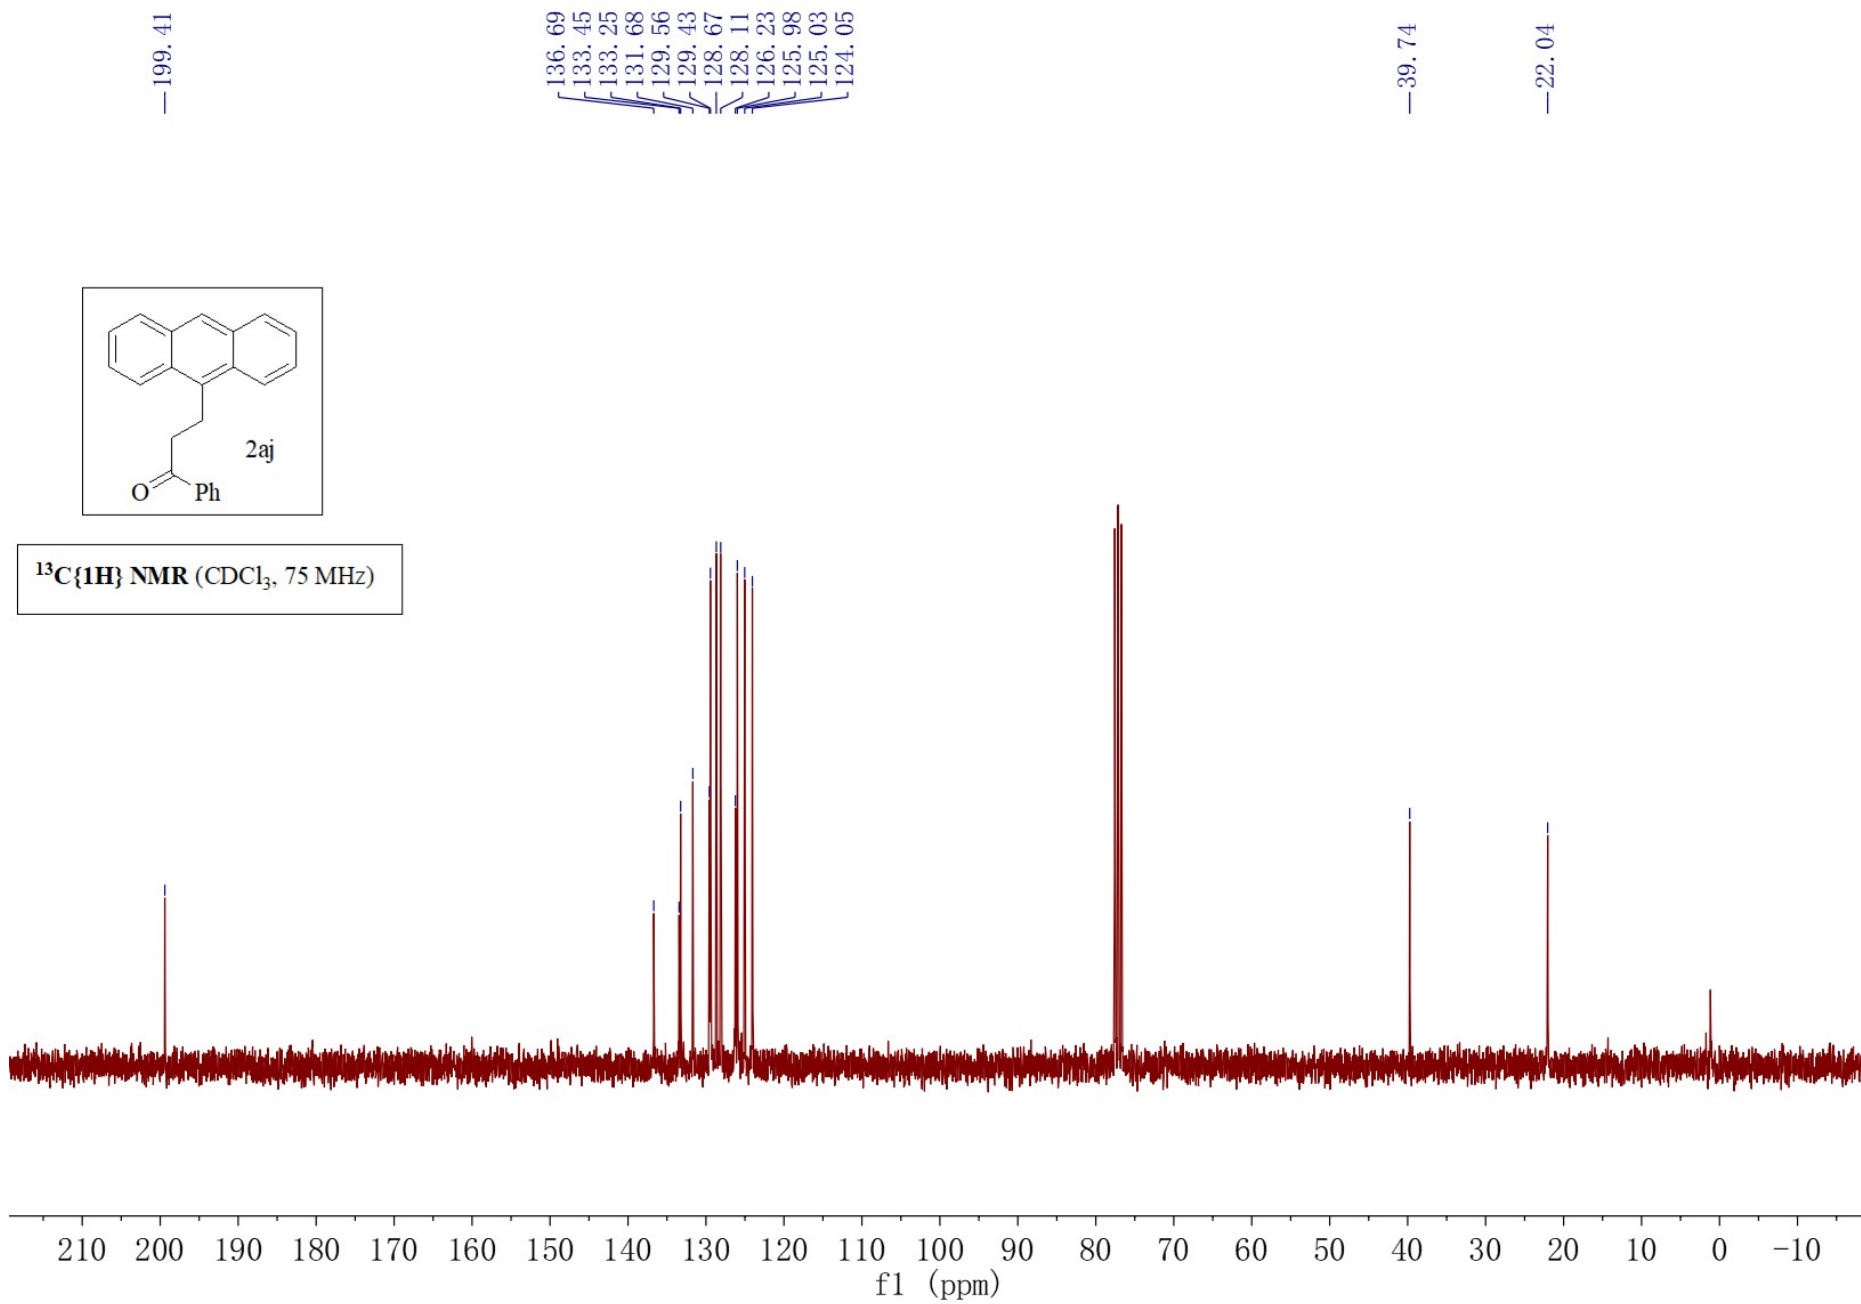

8.13  
8.10  
7.74  
7.72  
7.69  
7.63  
7.61  
7.59  
7.34  
7.31  
7.27  
7.24  
7.19  
7.16

3.10  
3.08

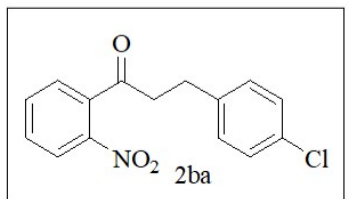

<sup>1</sup>H NMR (CDCl<sub>3</sub>, 300 MHz)

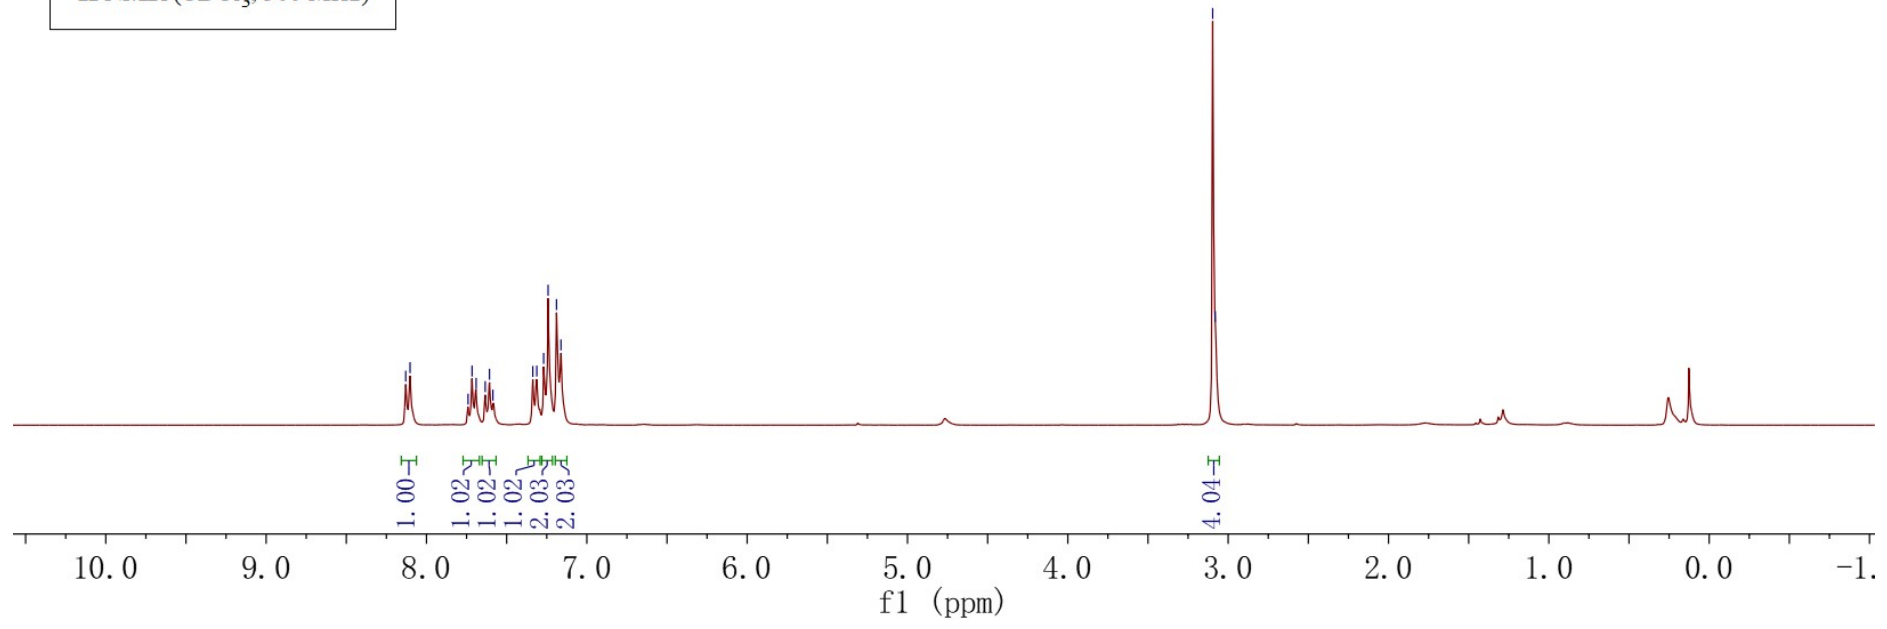

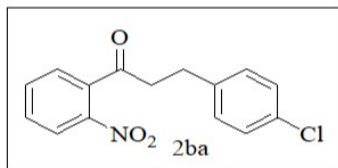

<sup>13</sup>C{<sup>1</sup>H} NMR (CDCl<sub>3</sub>, 75 MHz)

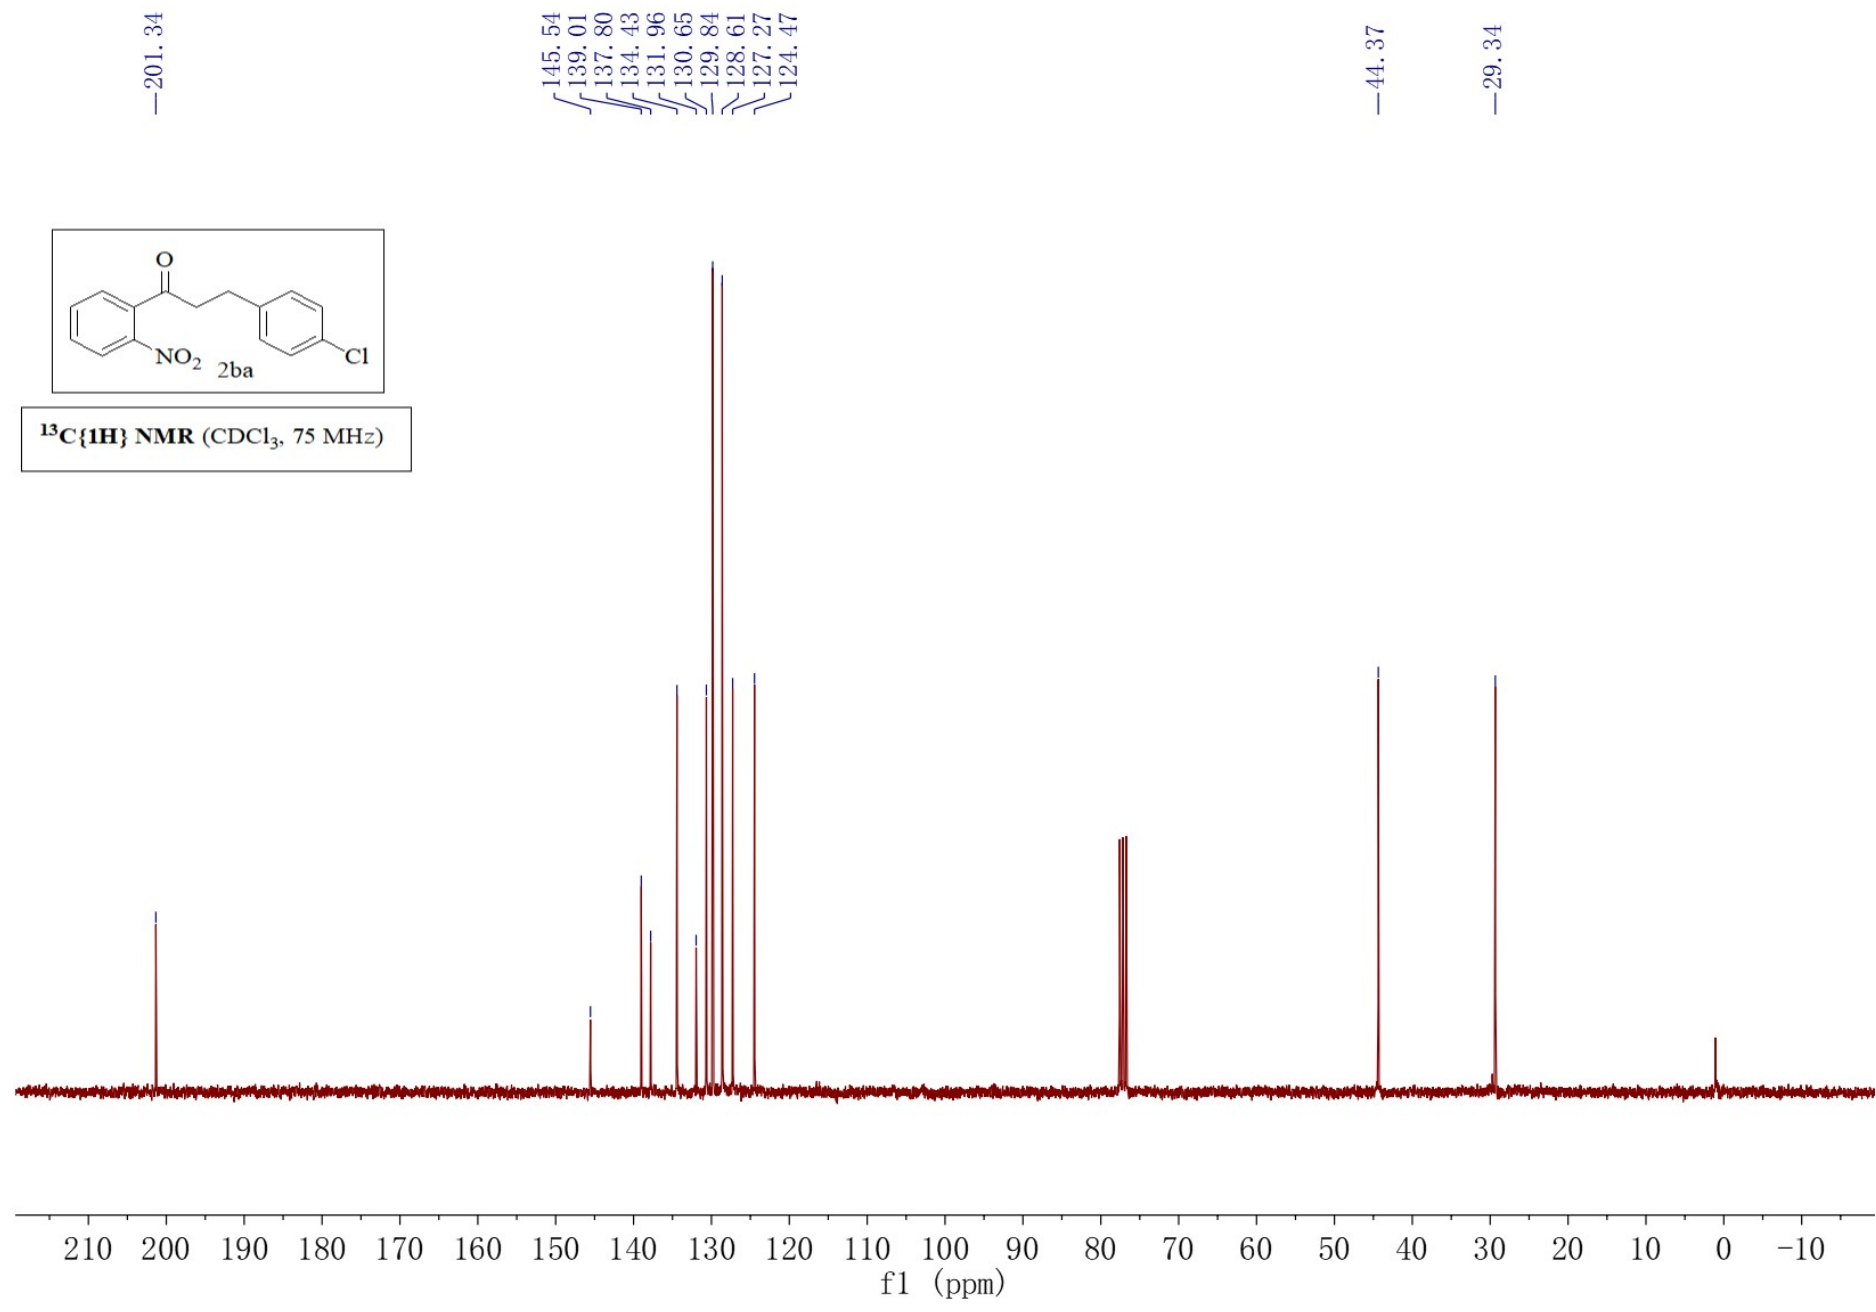

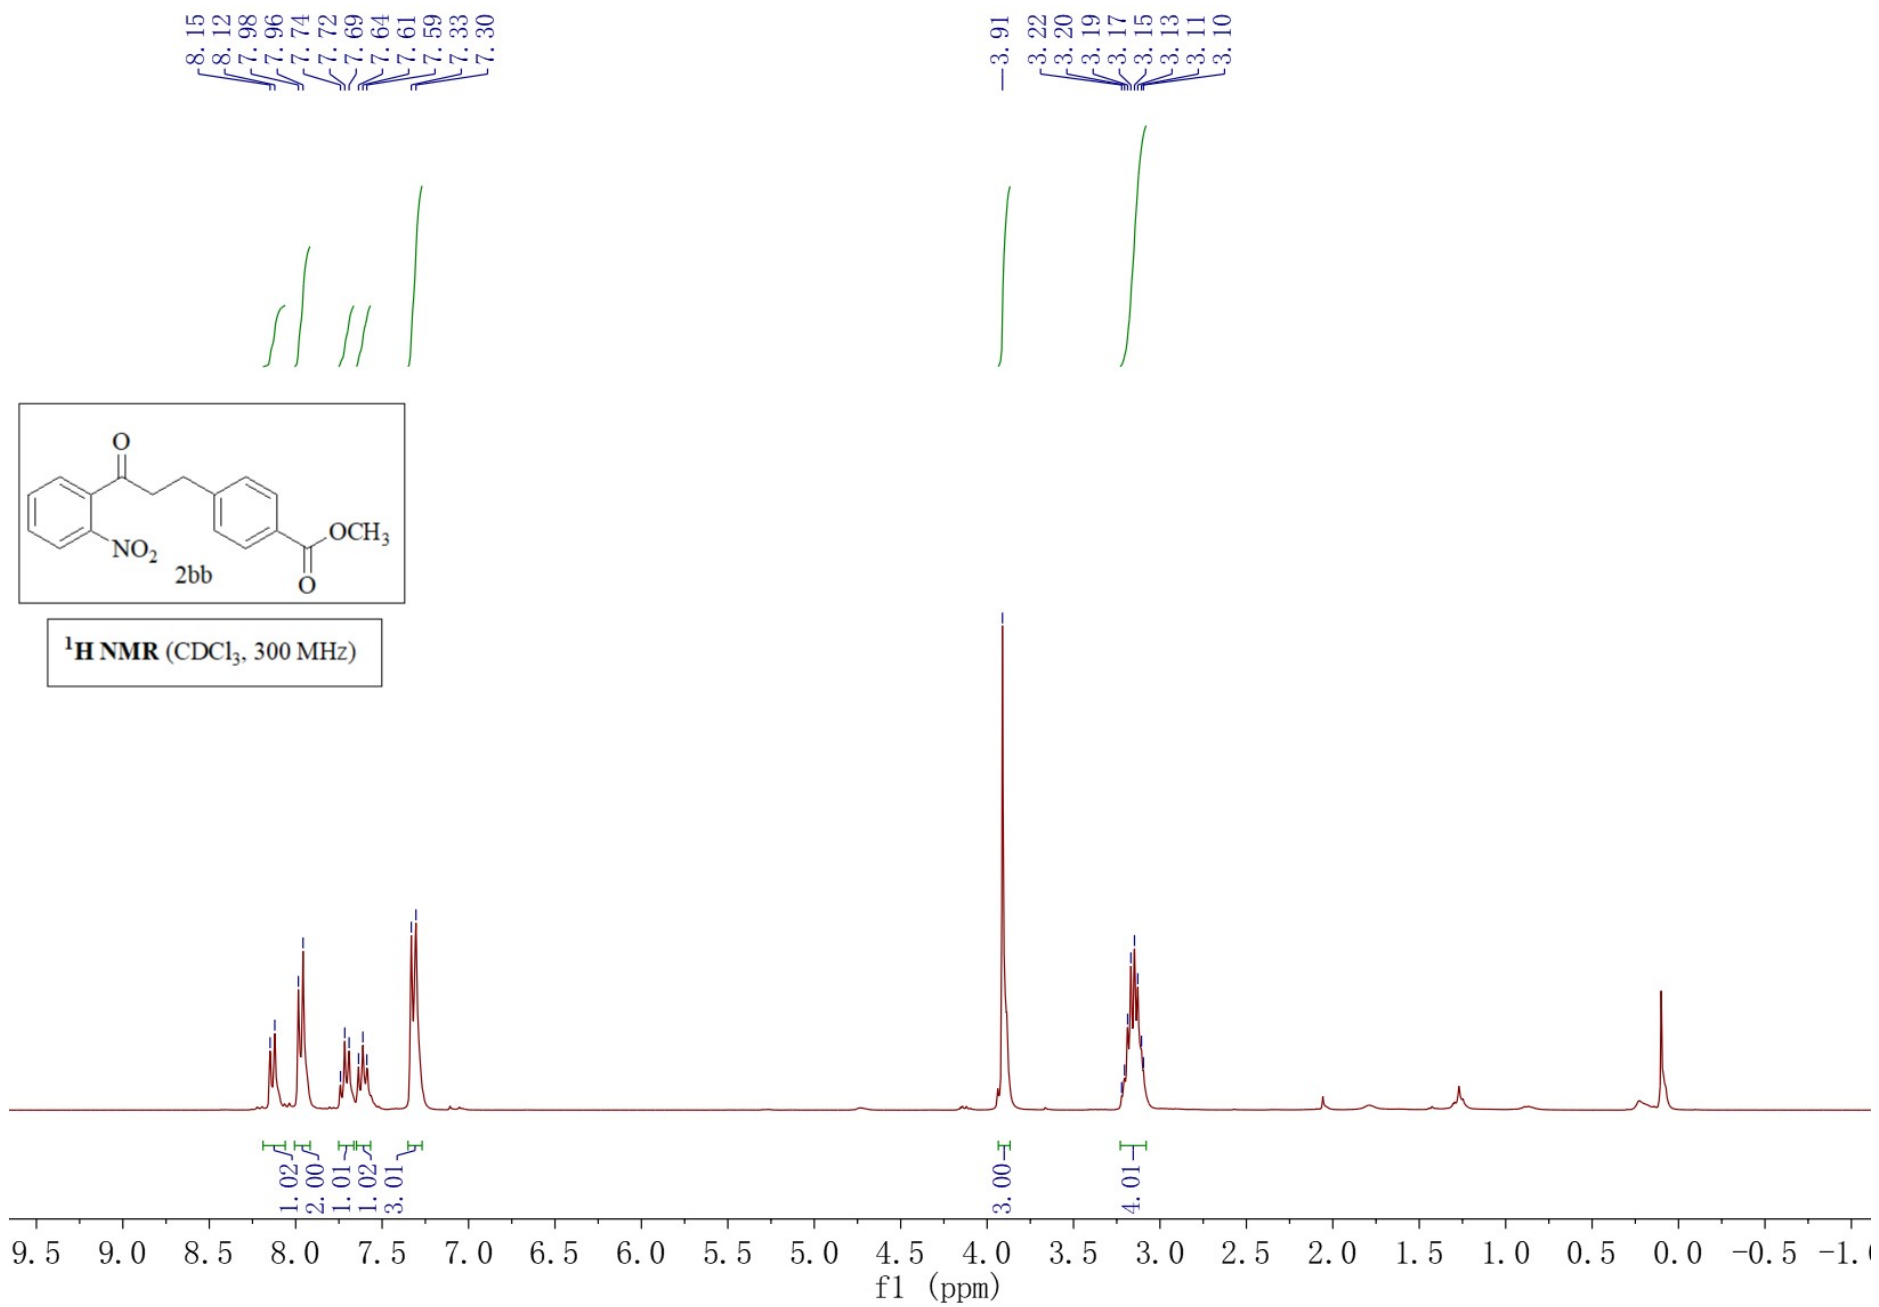

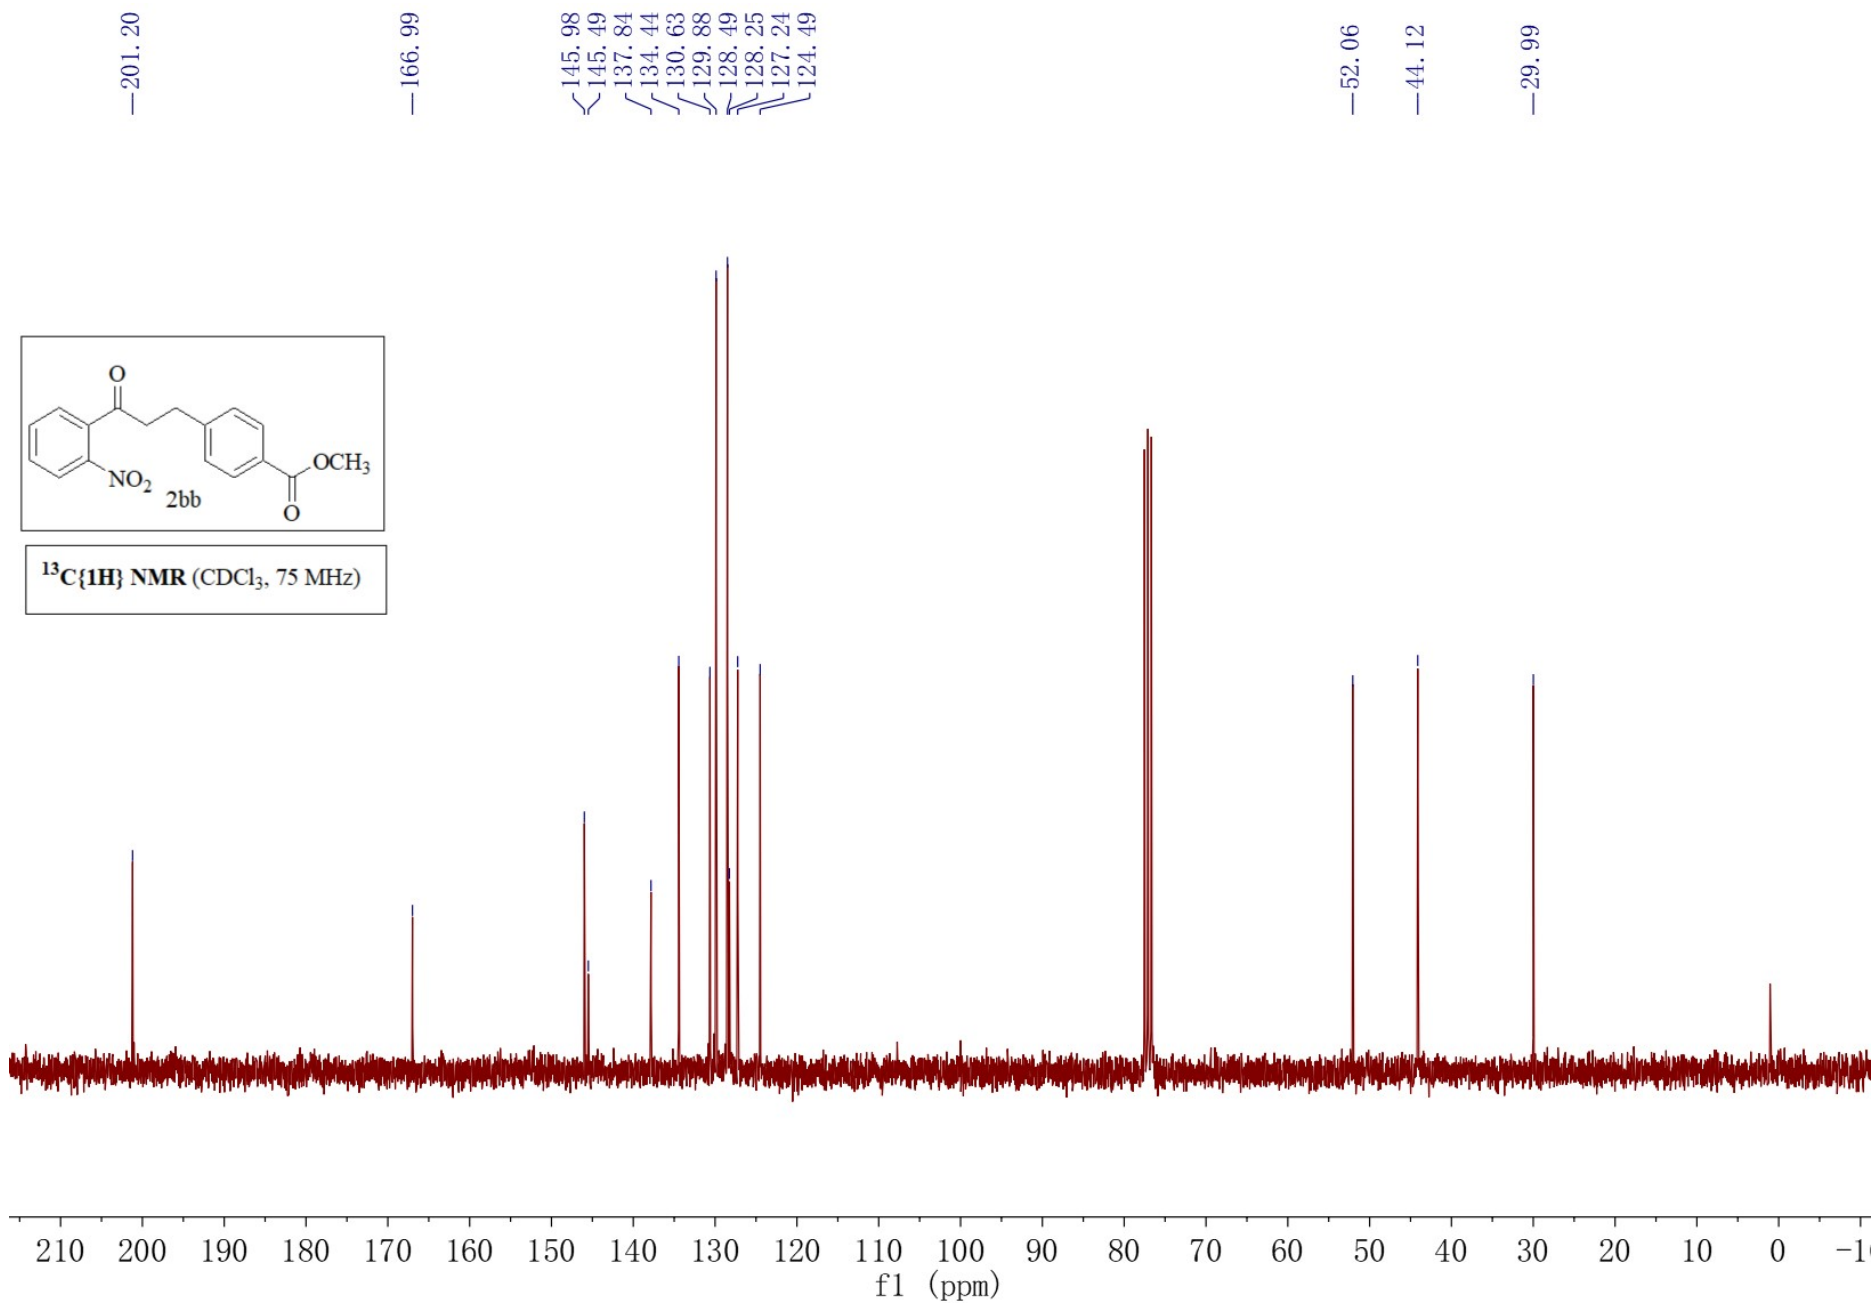

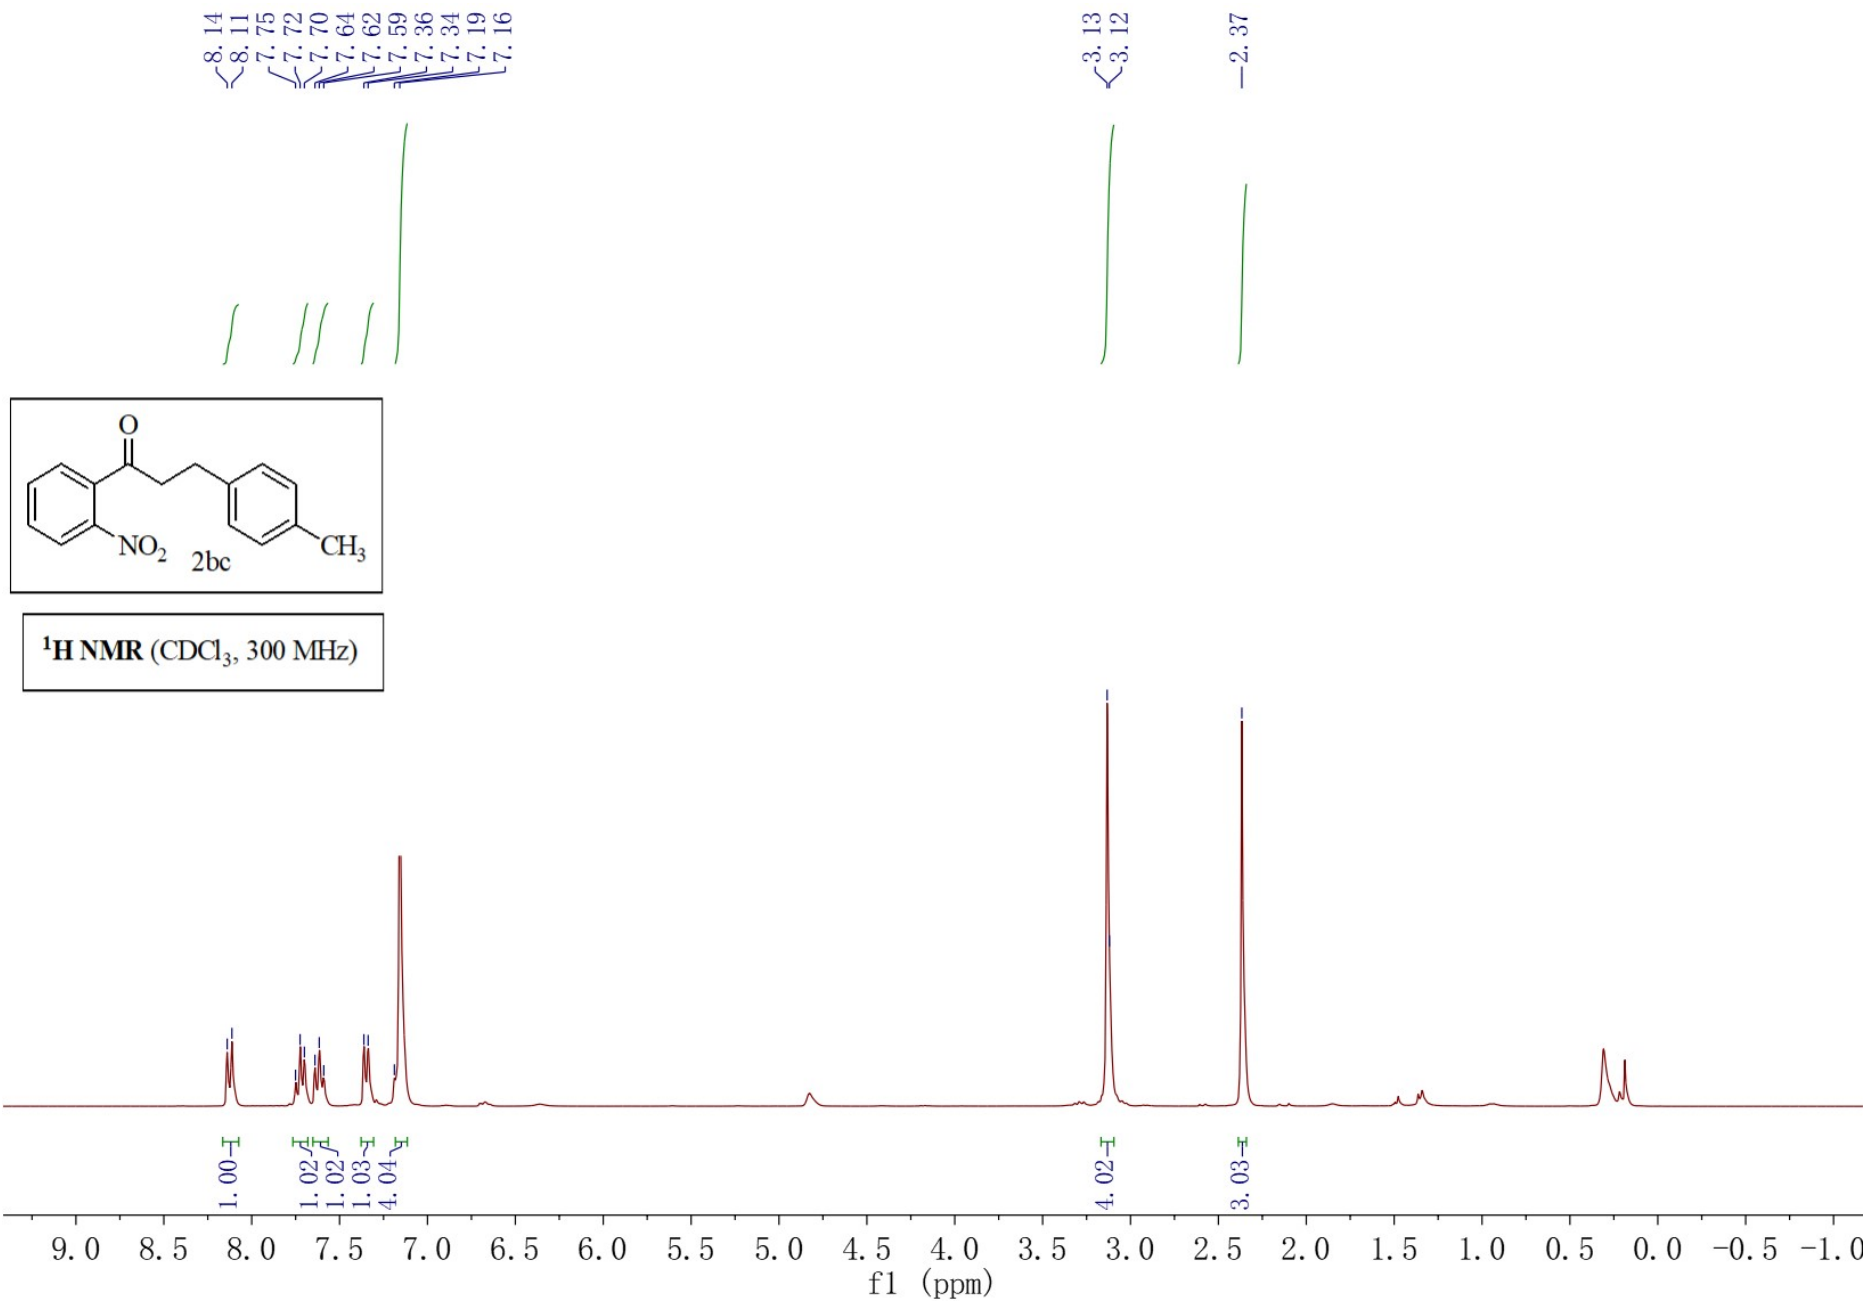



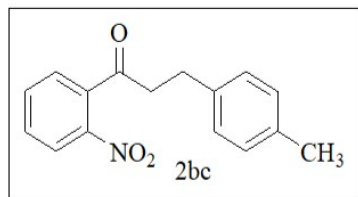

$^{13}\text{C}\{^1\text{H}\}$  NMR ( $\text{CDCl}_3$ , 75 MHz)

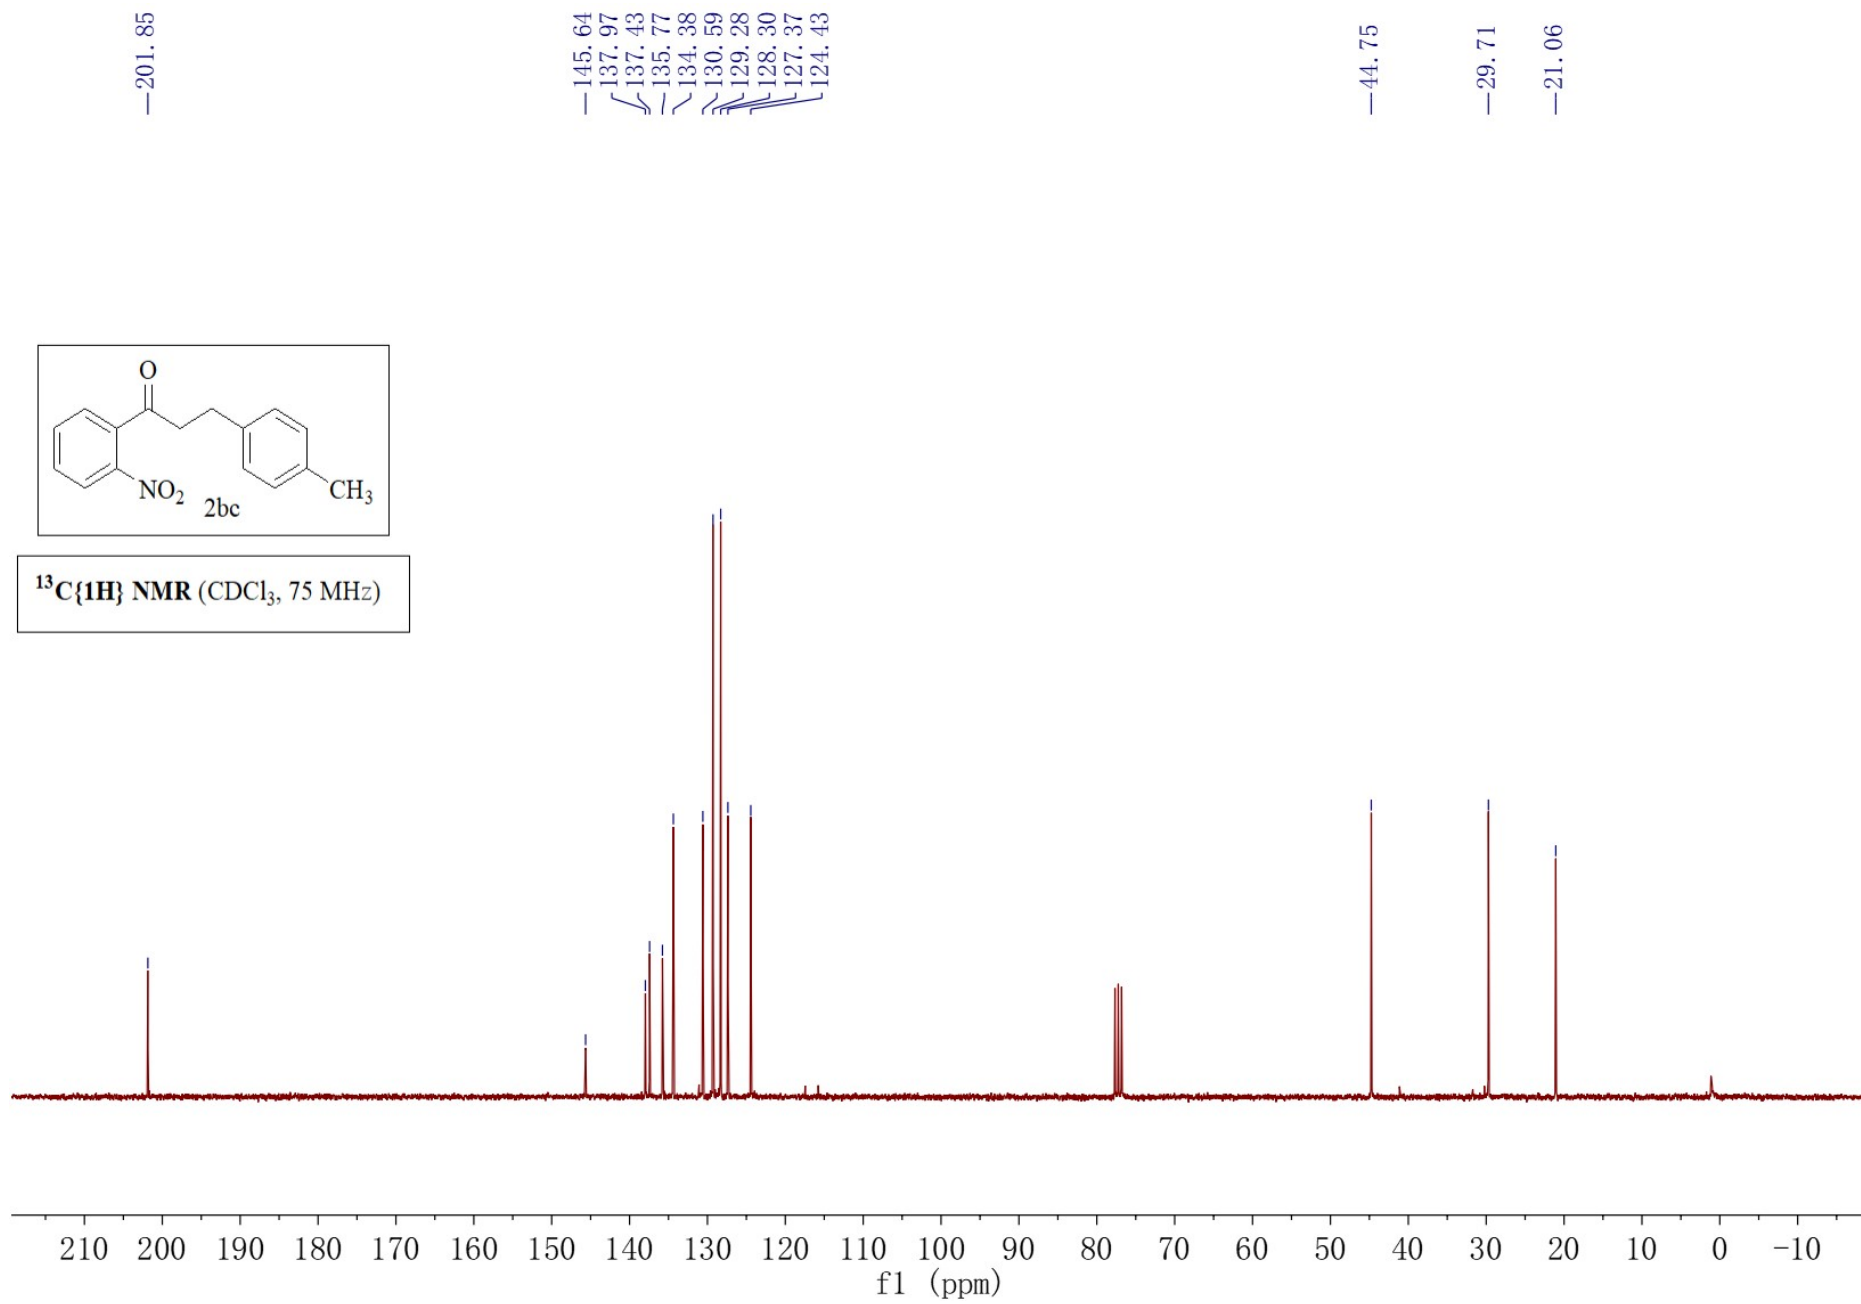

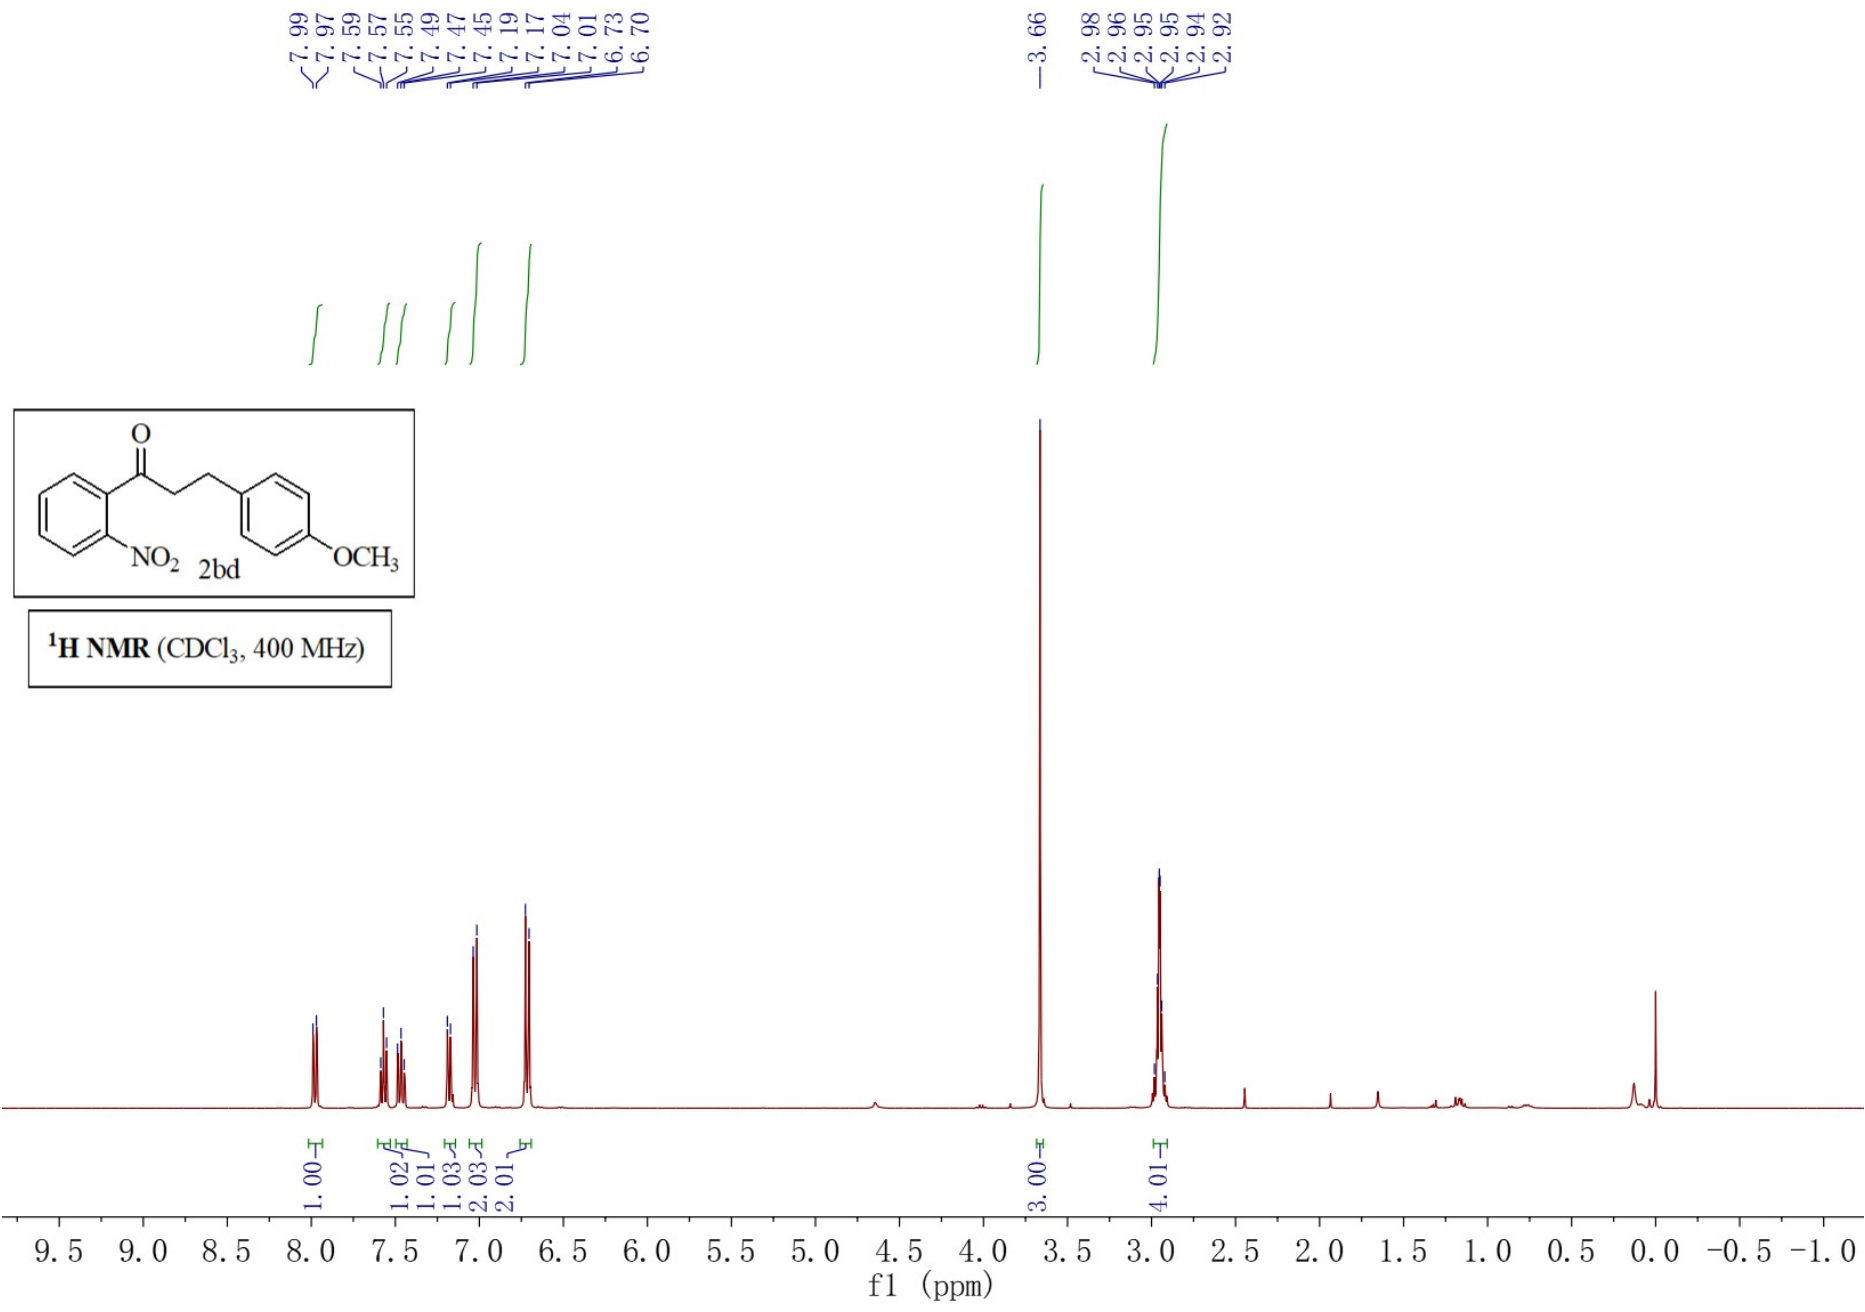

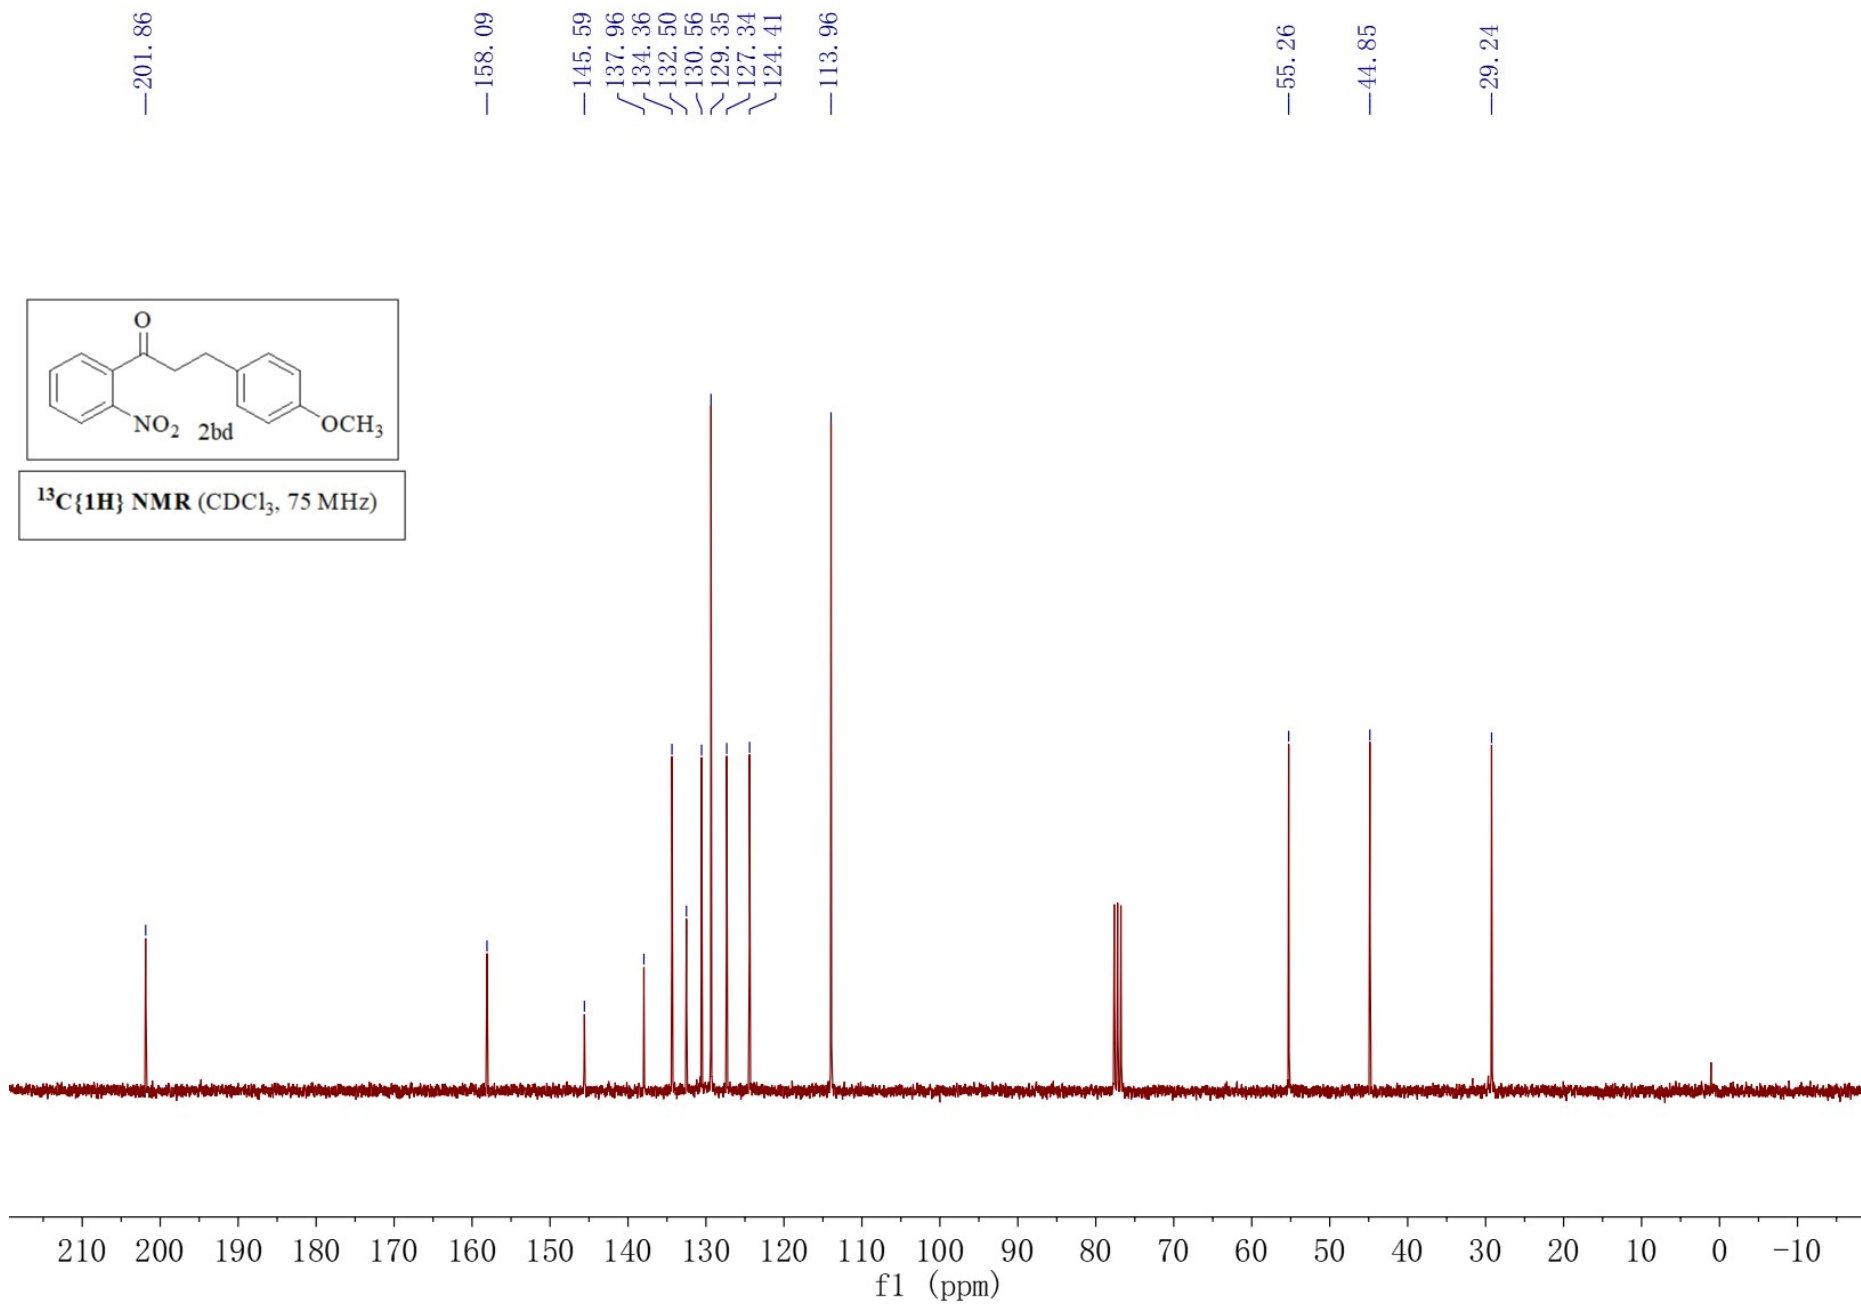

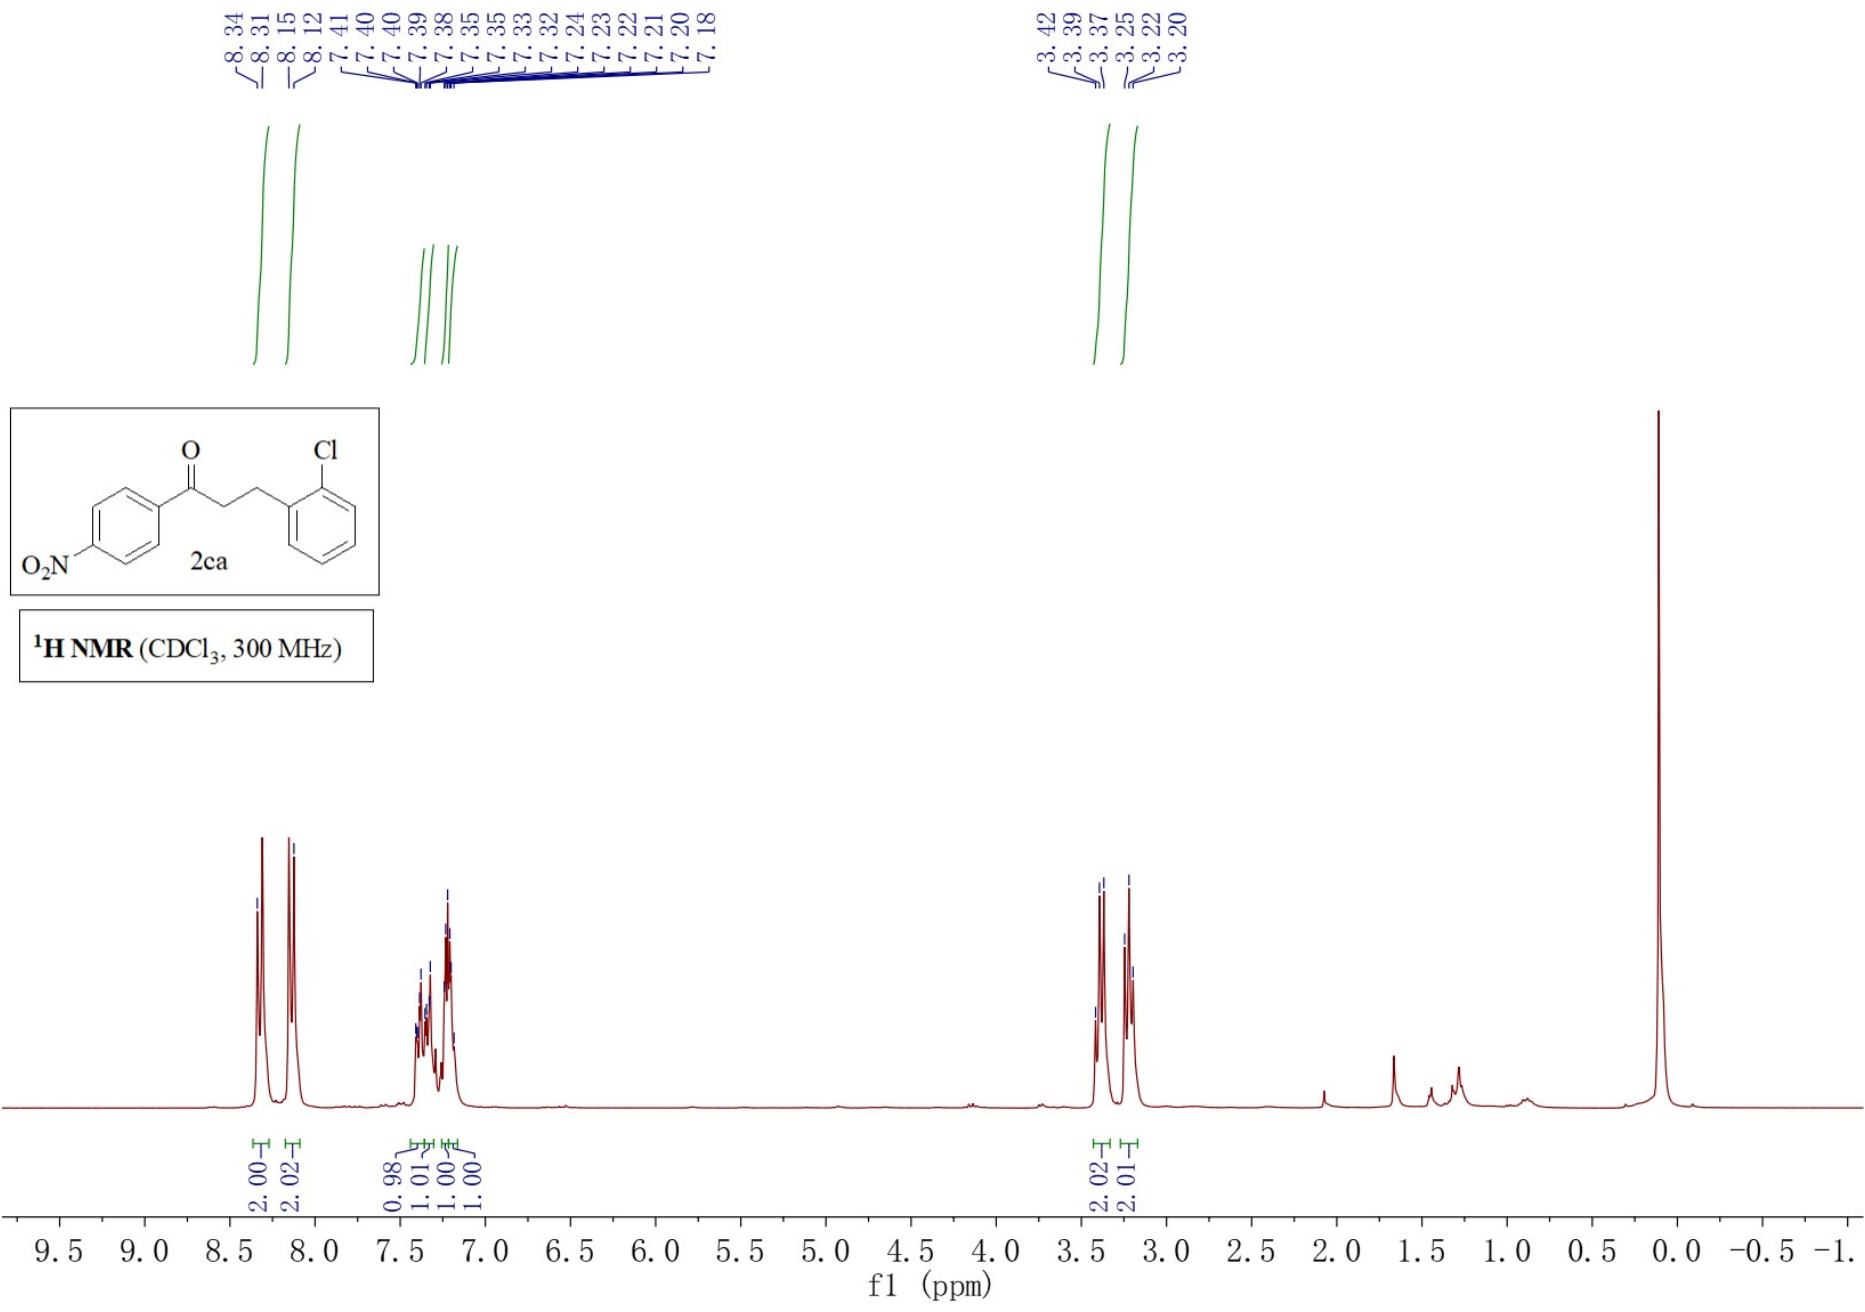

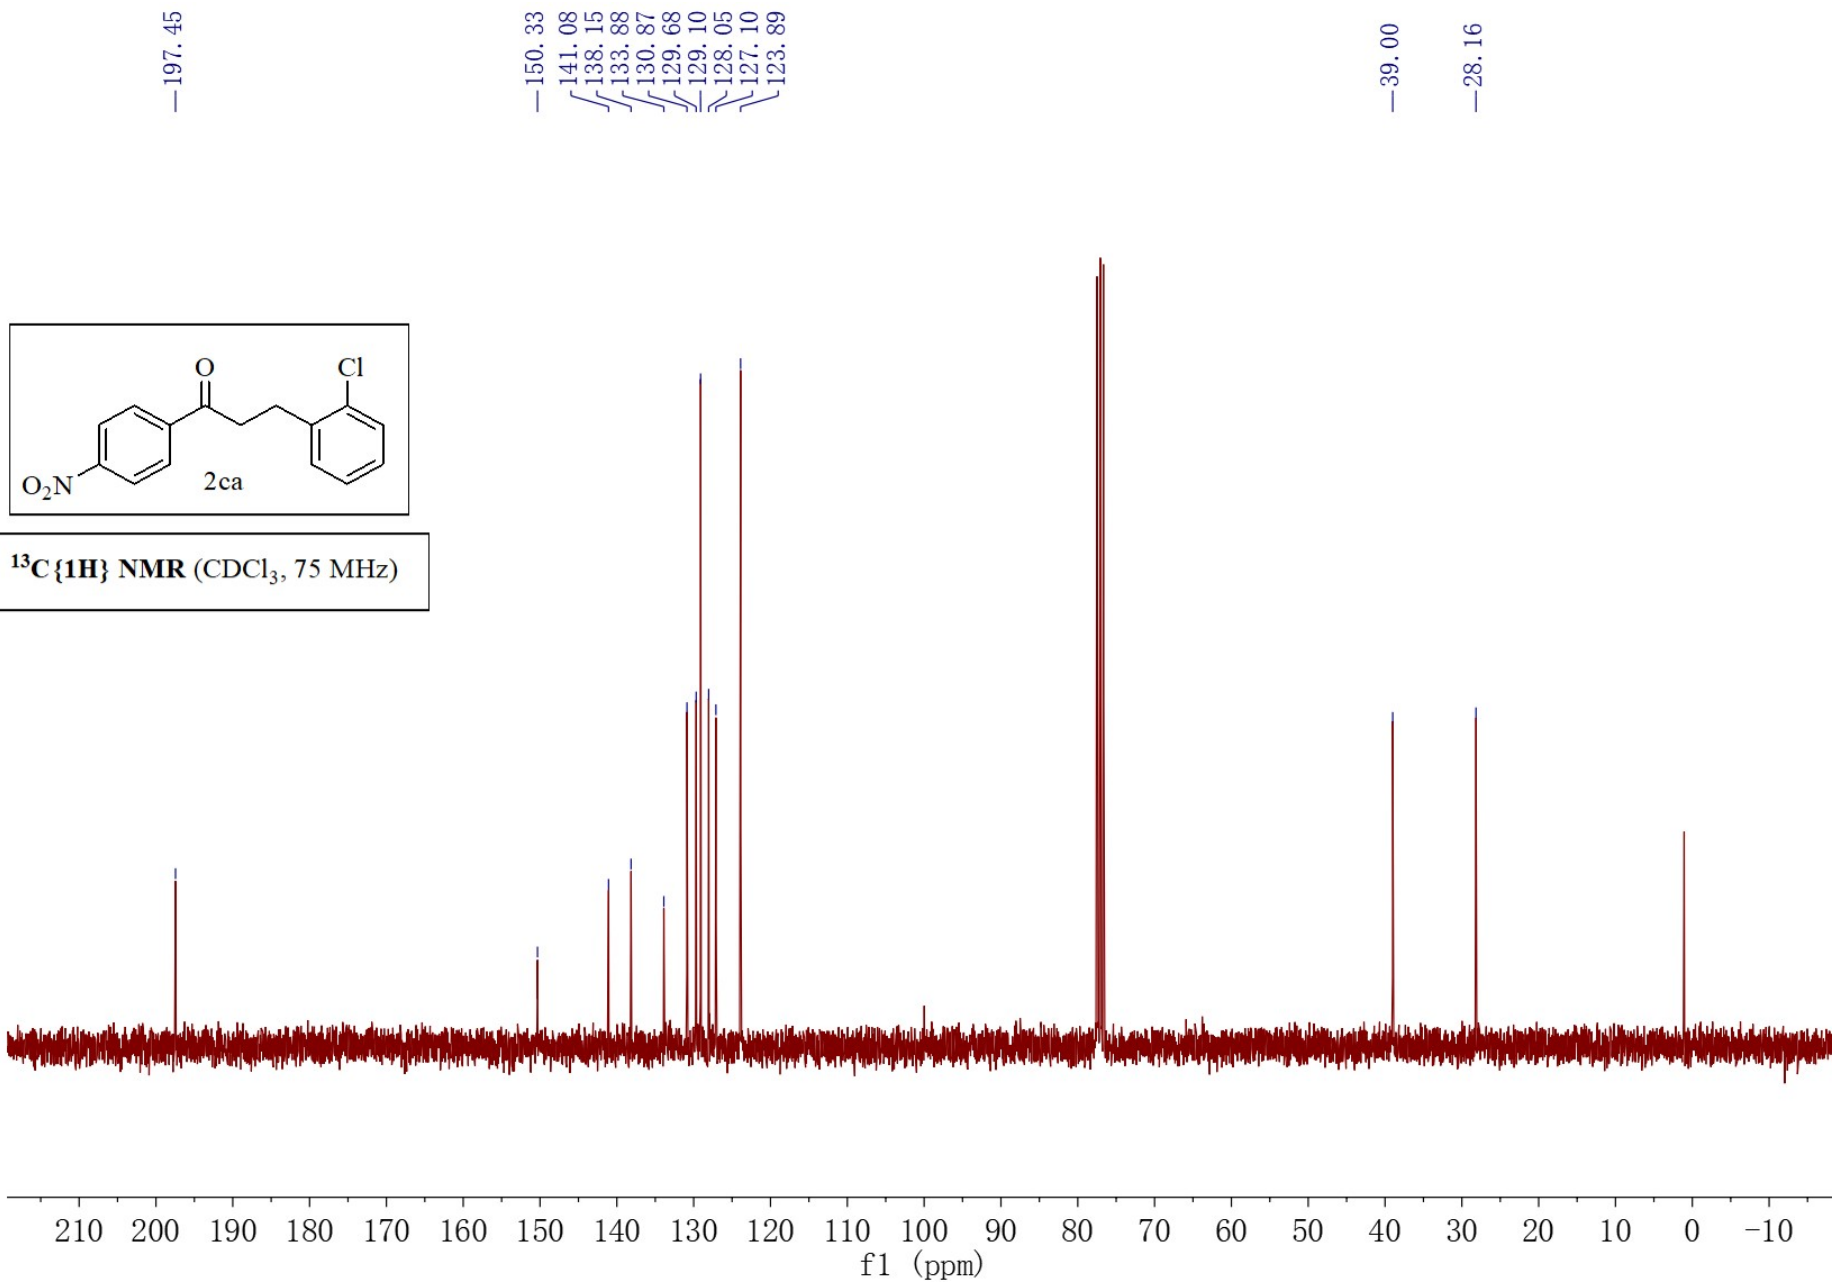

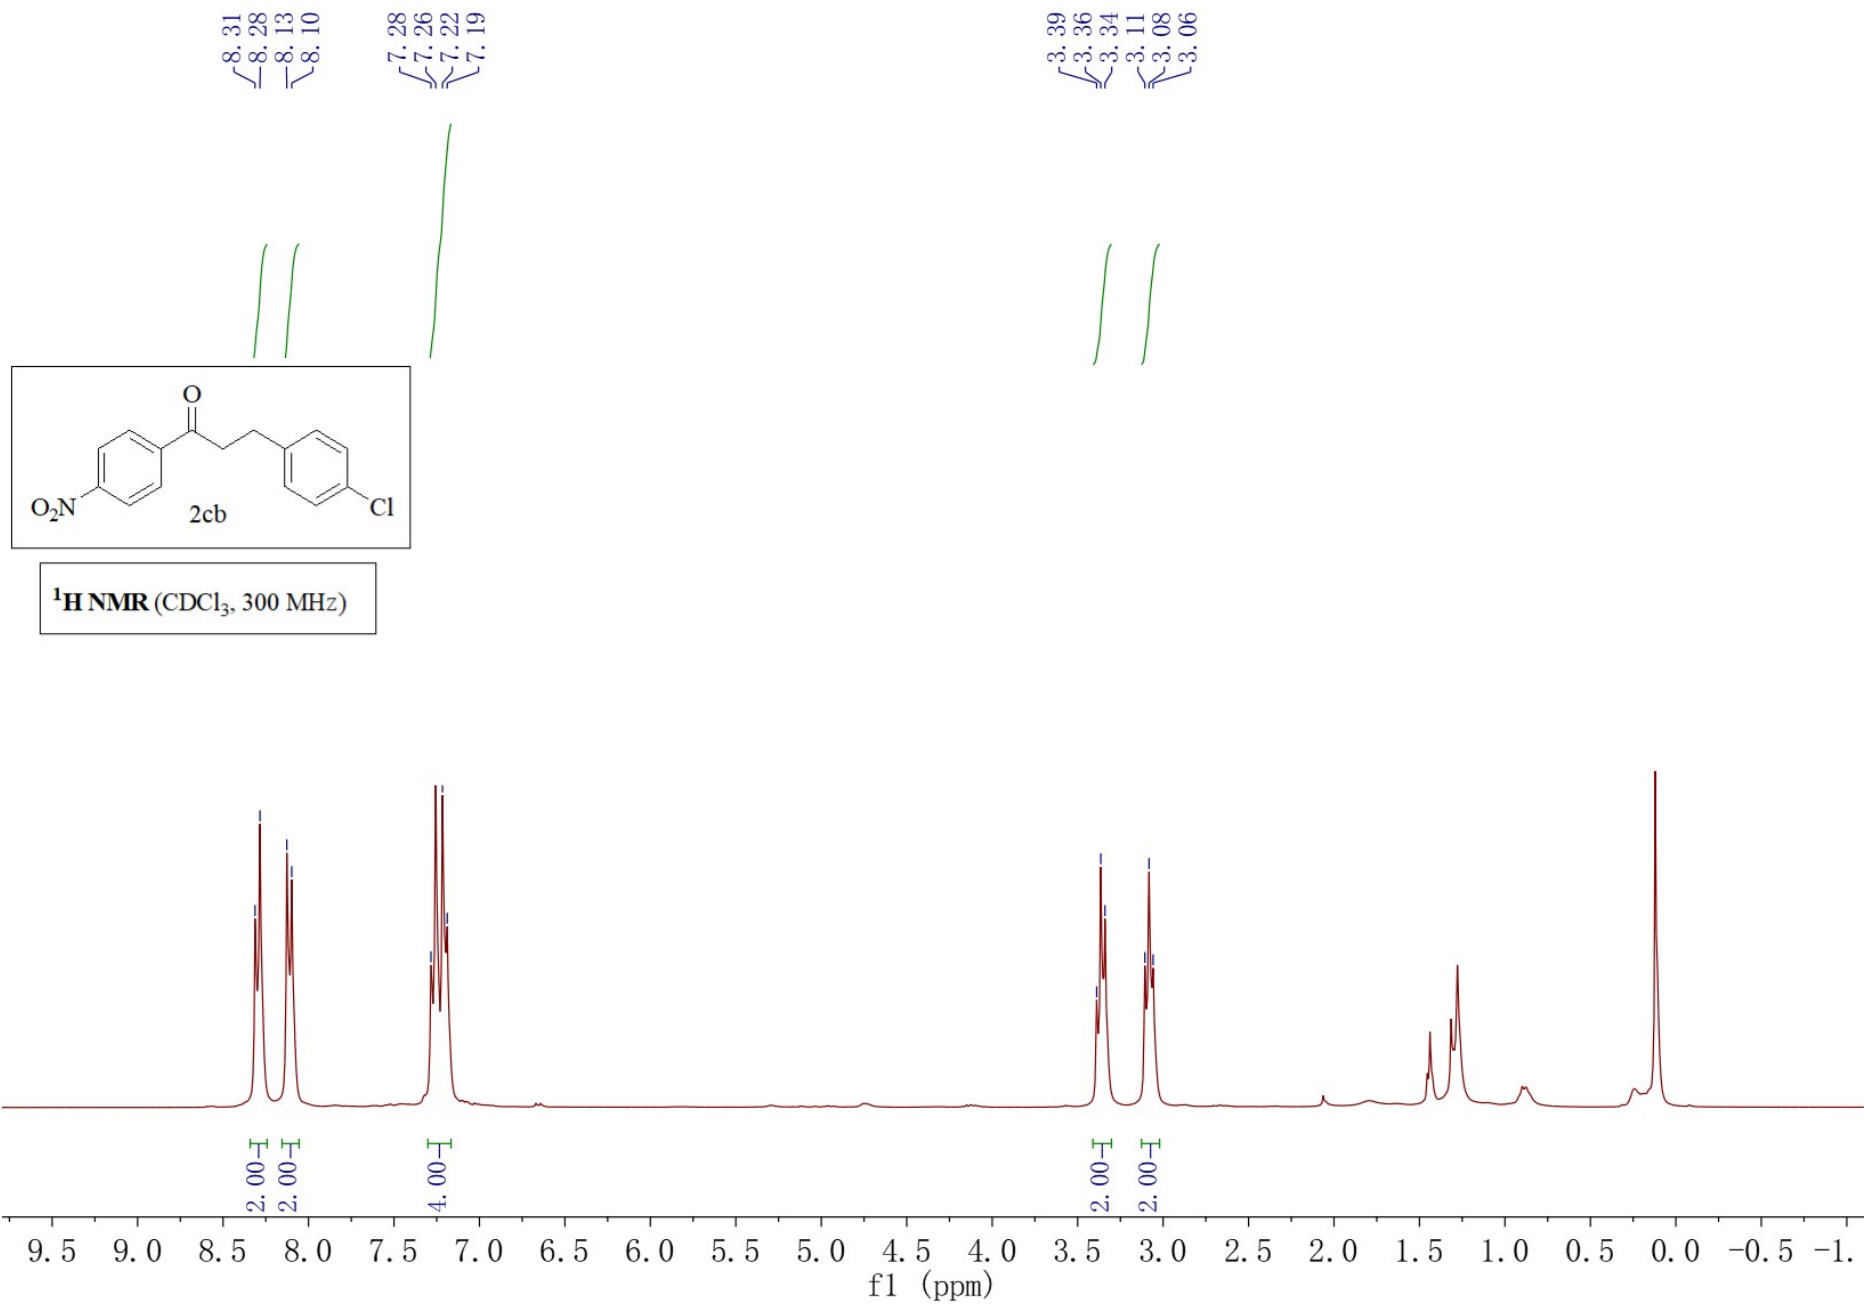

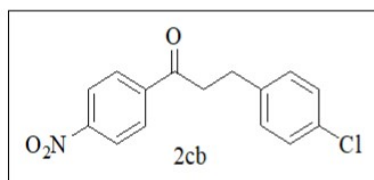

$^{13}\text{C}\{^1\text{H}\}$  NMR ( $\text{CDCl}_3$ , 75 MHz)

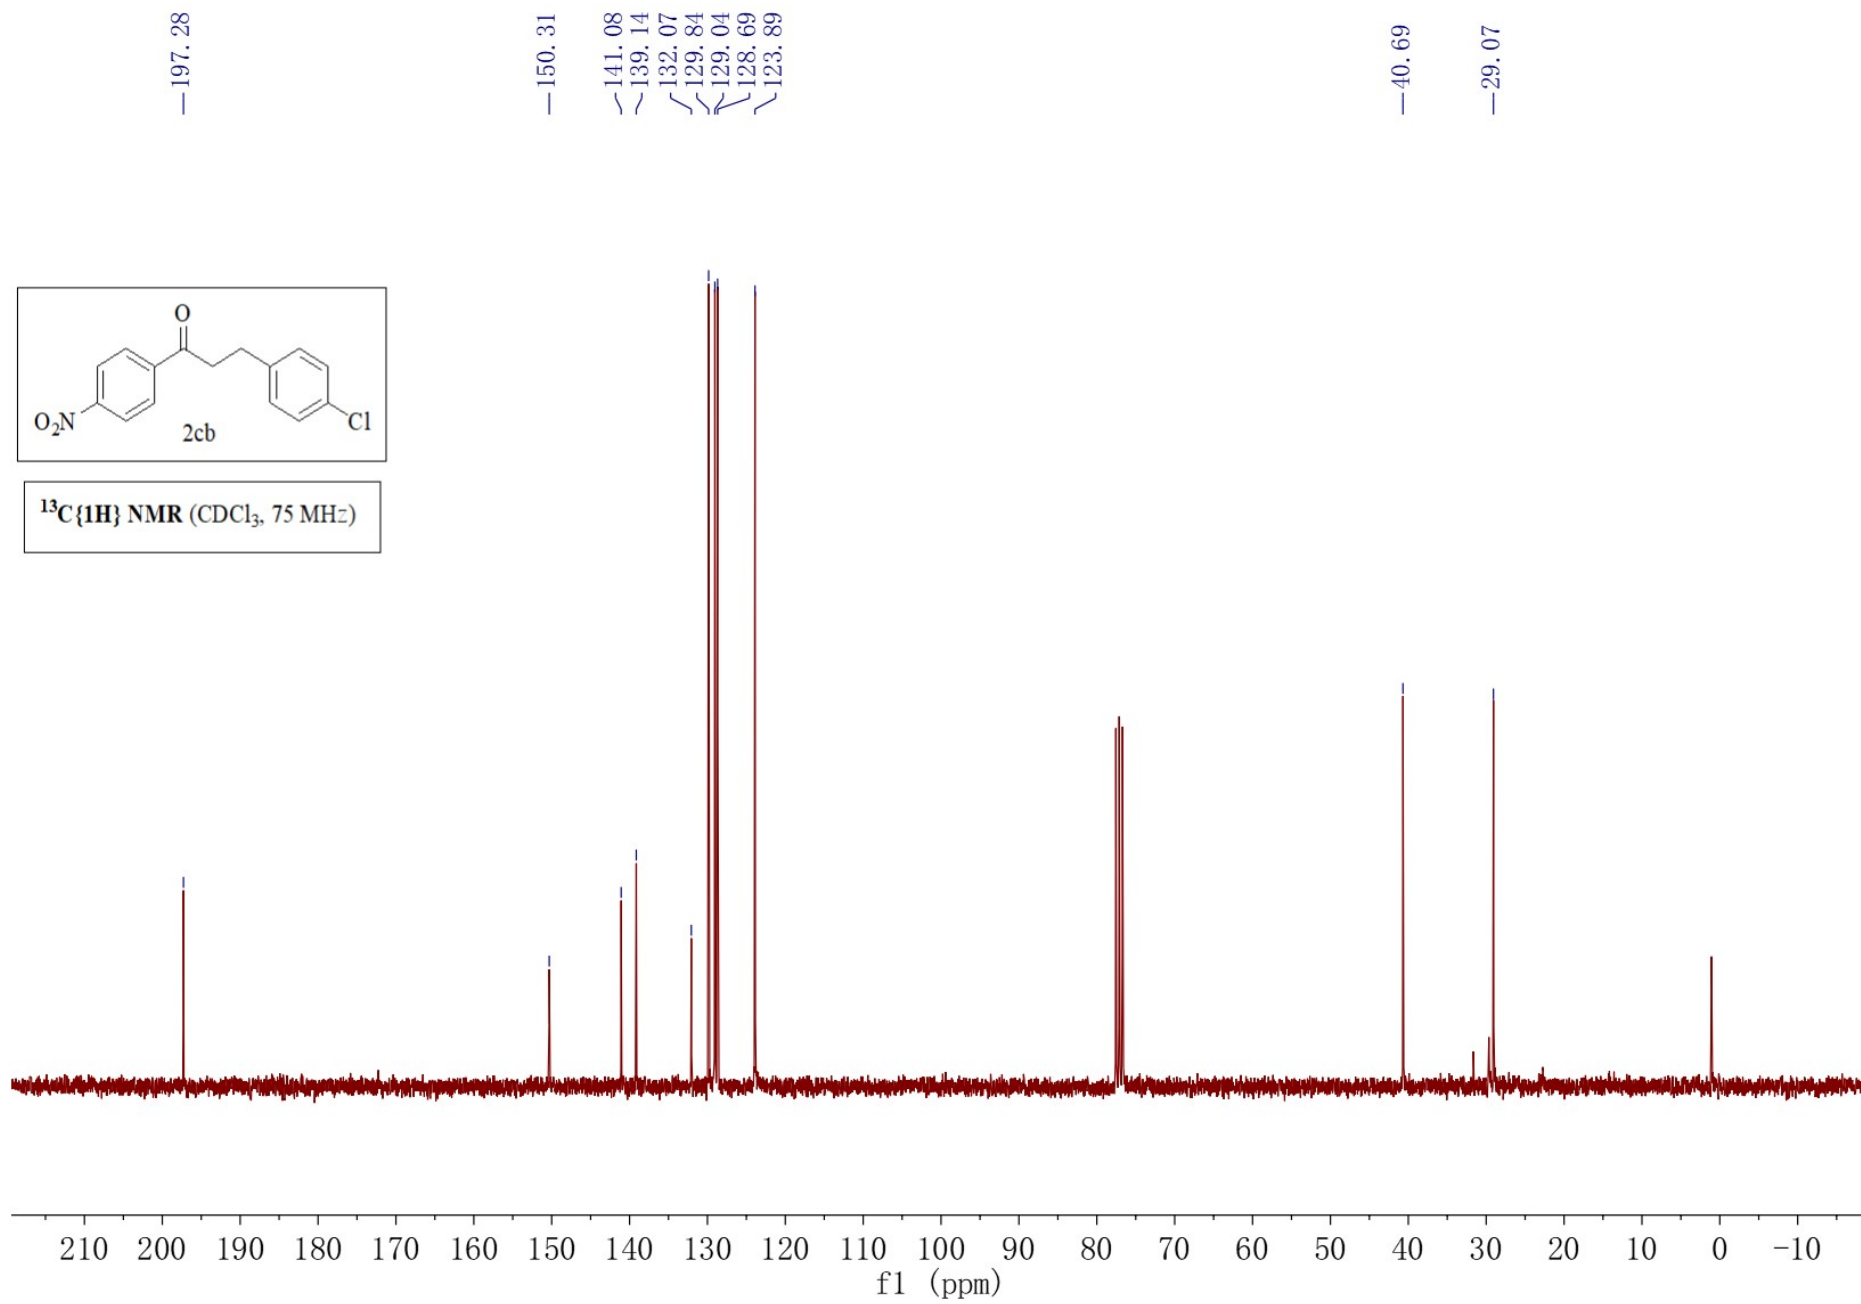

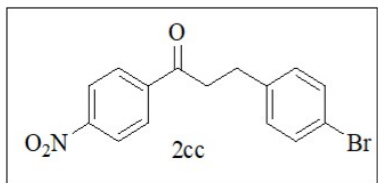

<sup>1</sup>H NMR (CDCl<sub>3</sub>, 300 MHz)

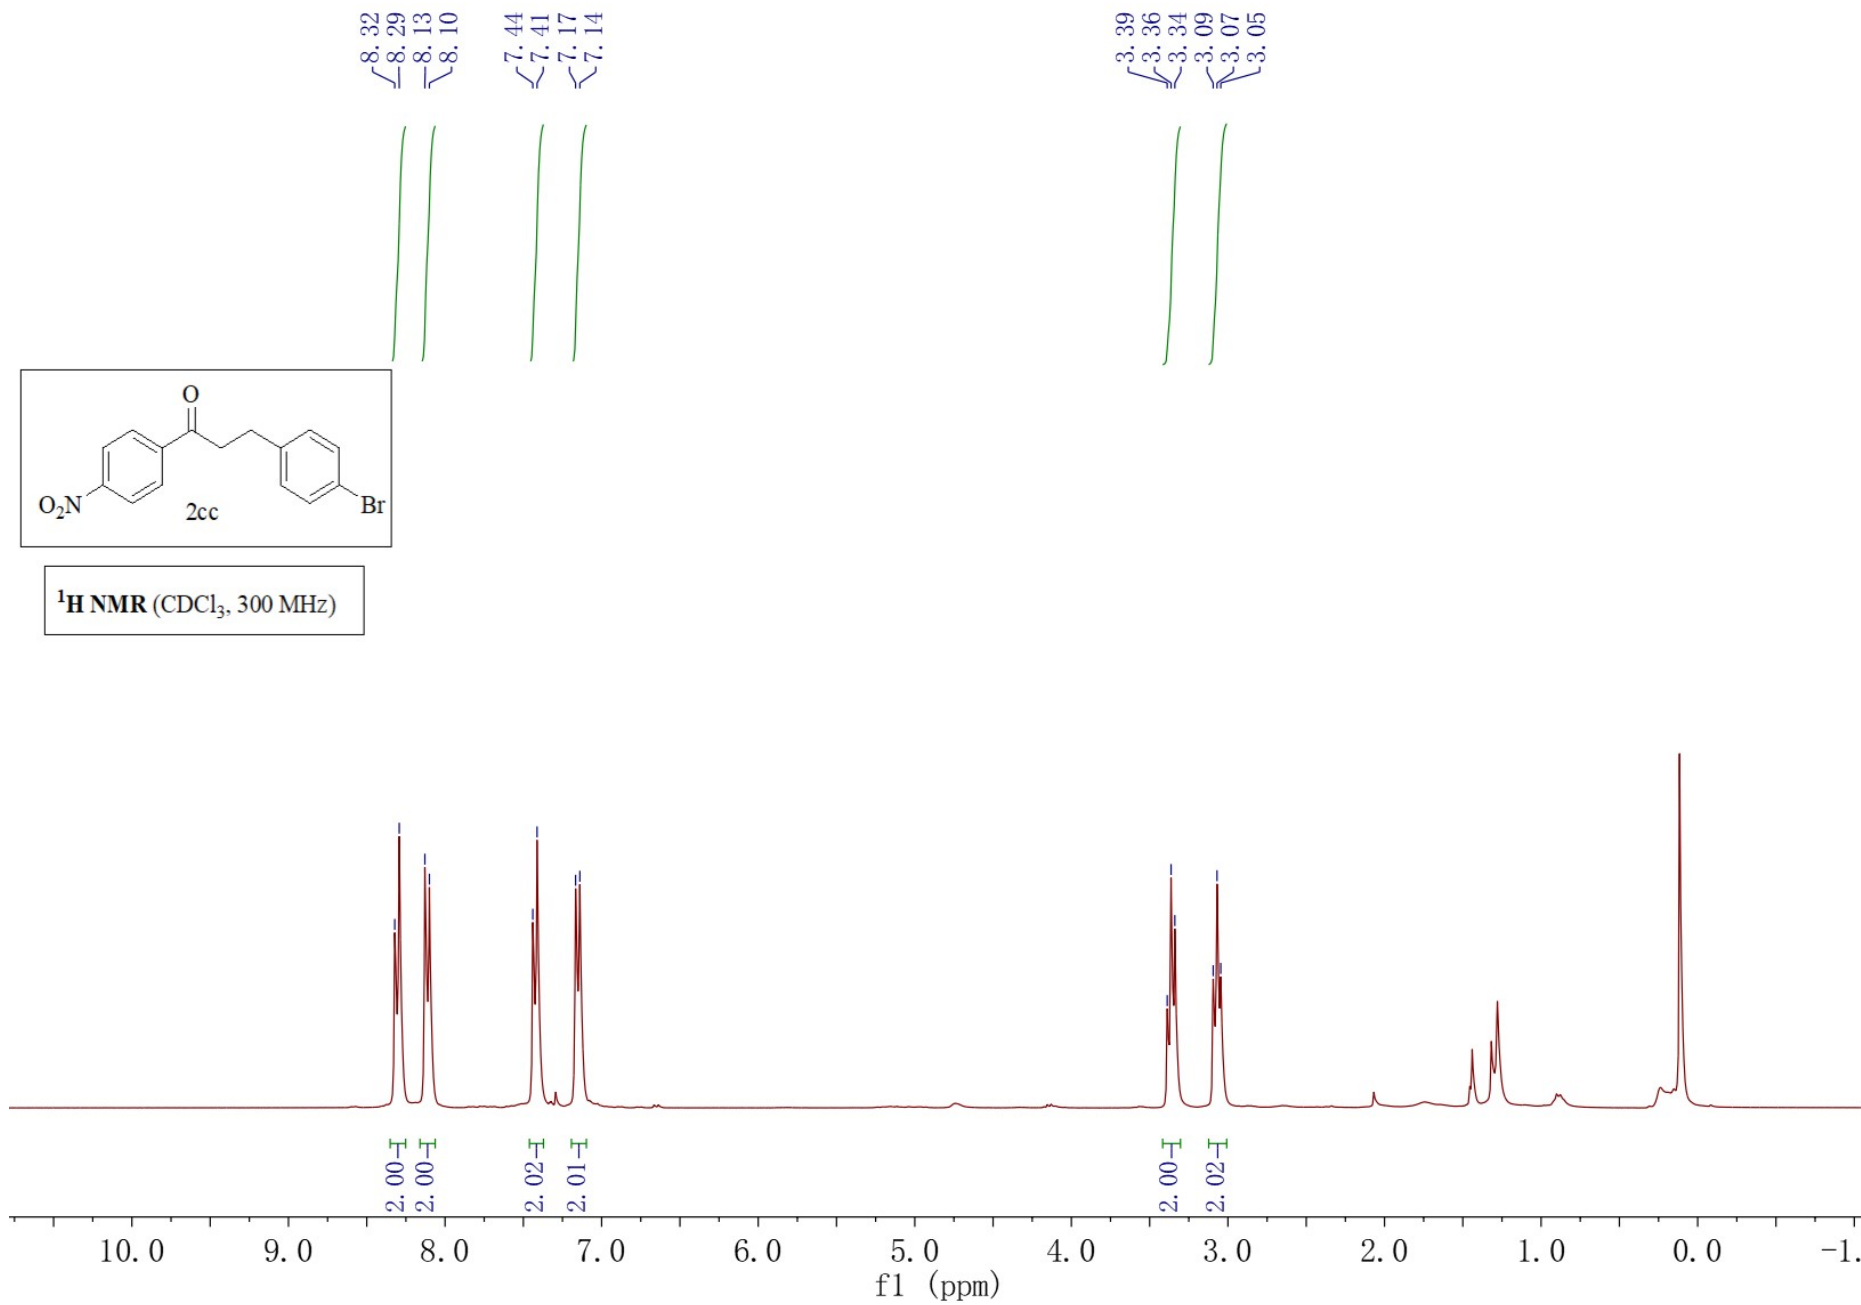



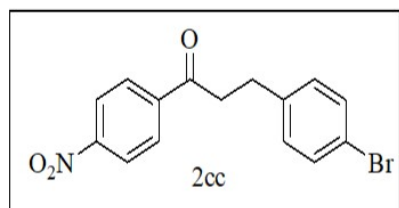

$^{13}\text{C}\{^1\text{H}\}$  NMR ( $\text{CDCl}_3$ , 75 MHz)

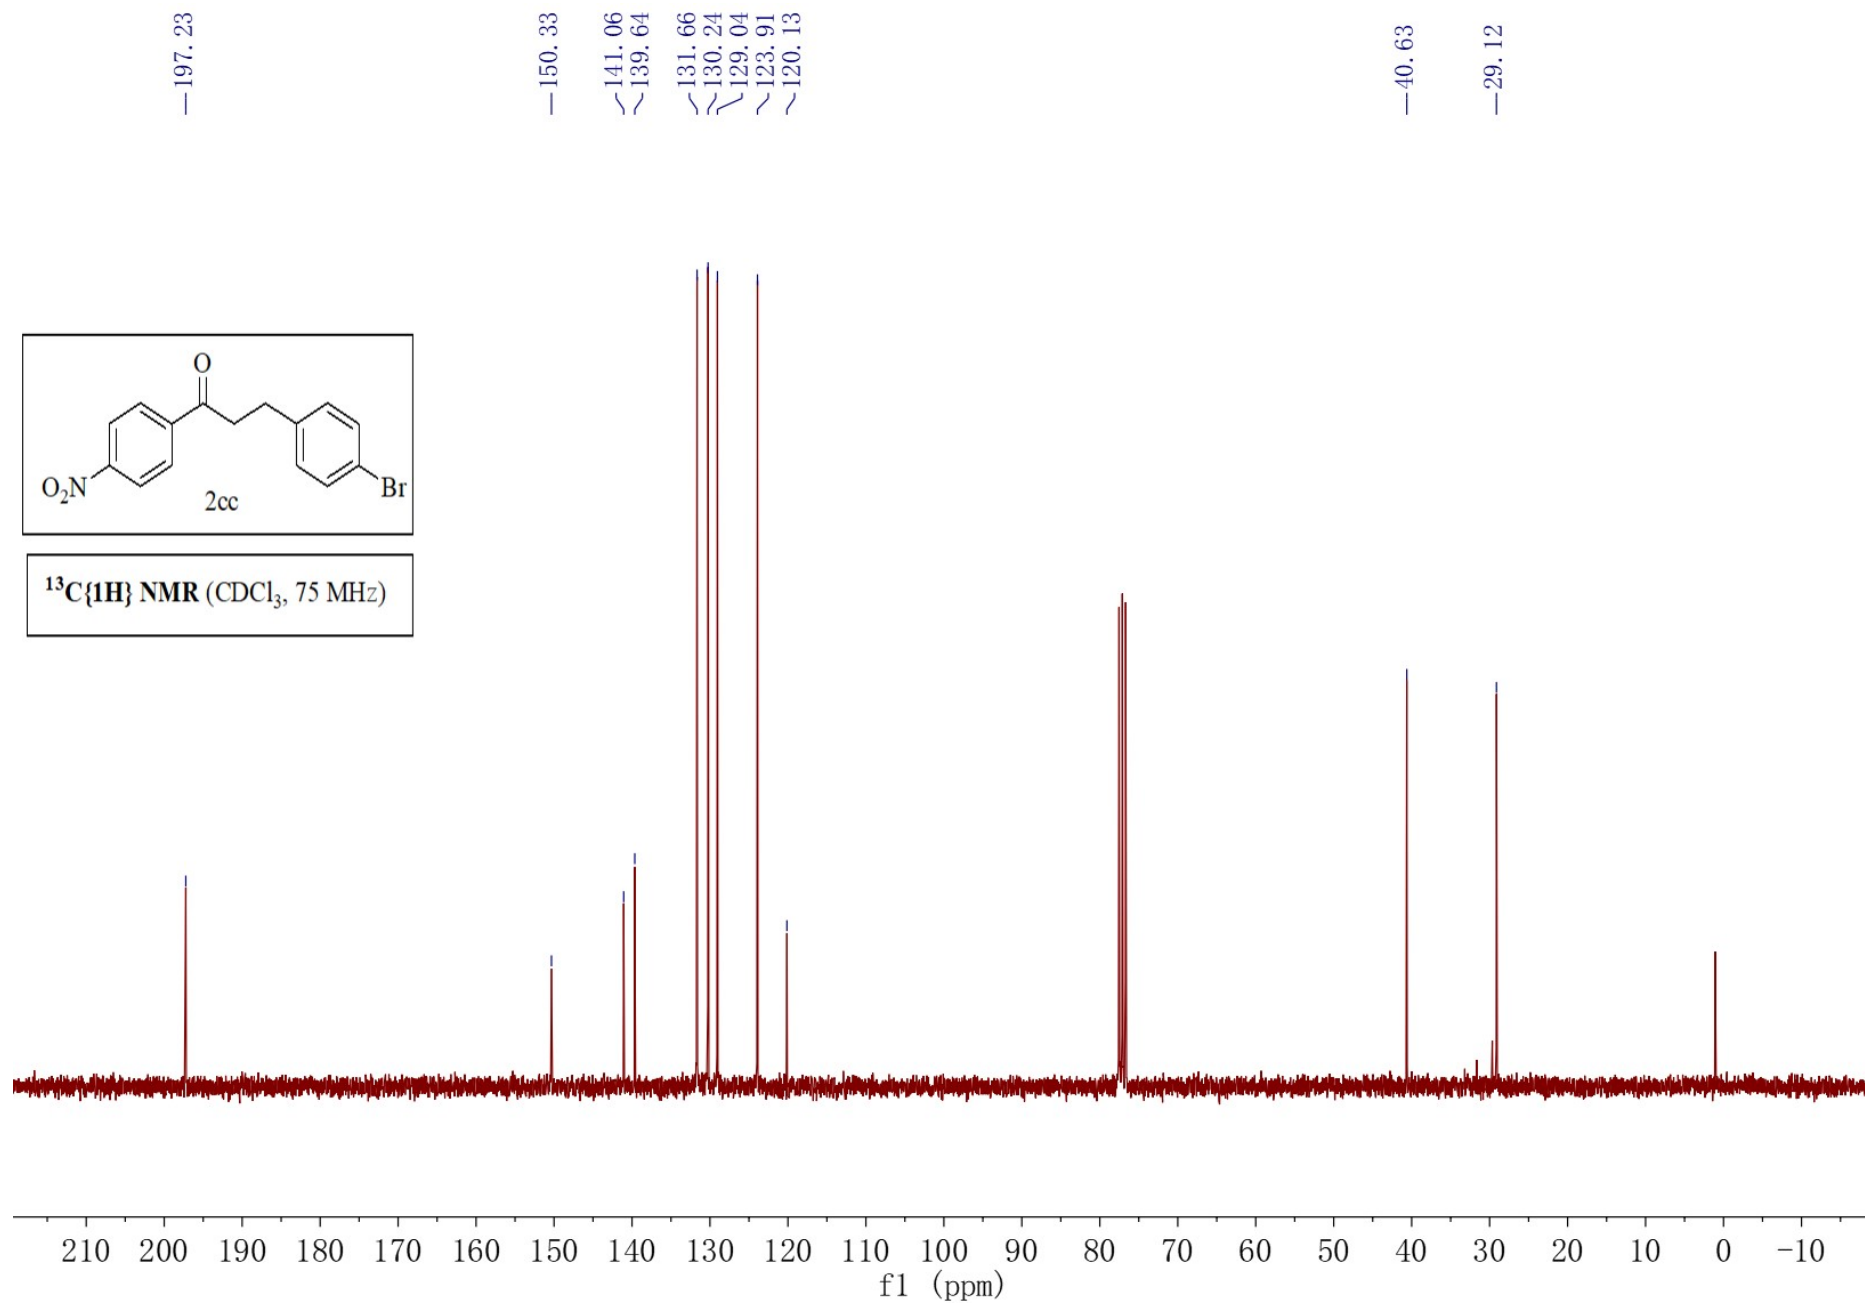

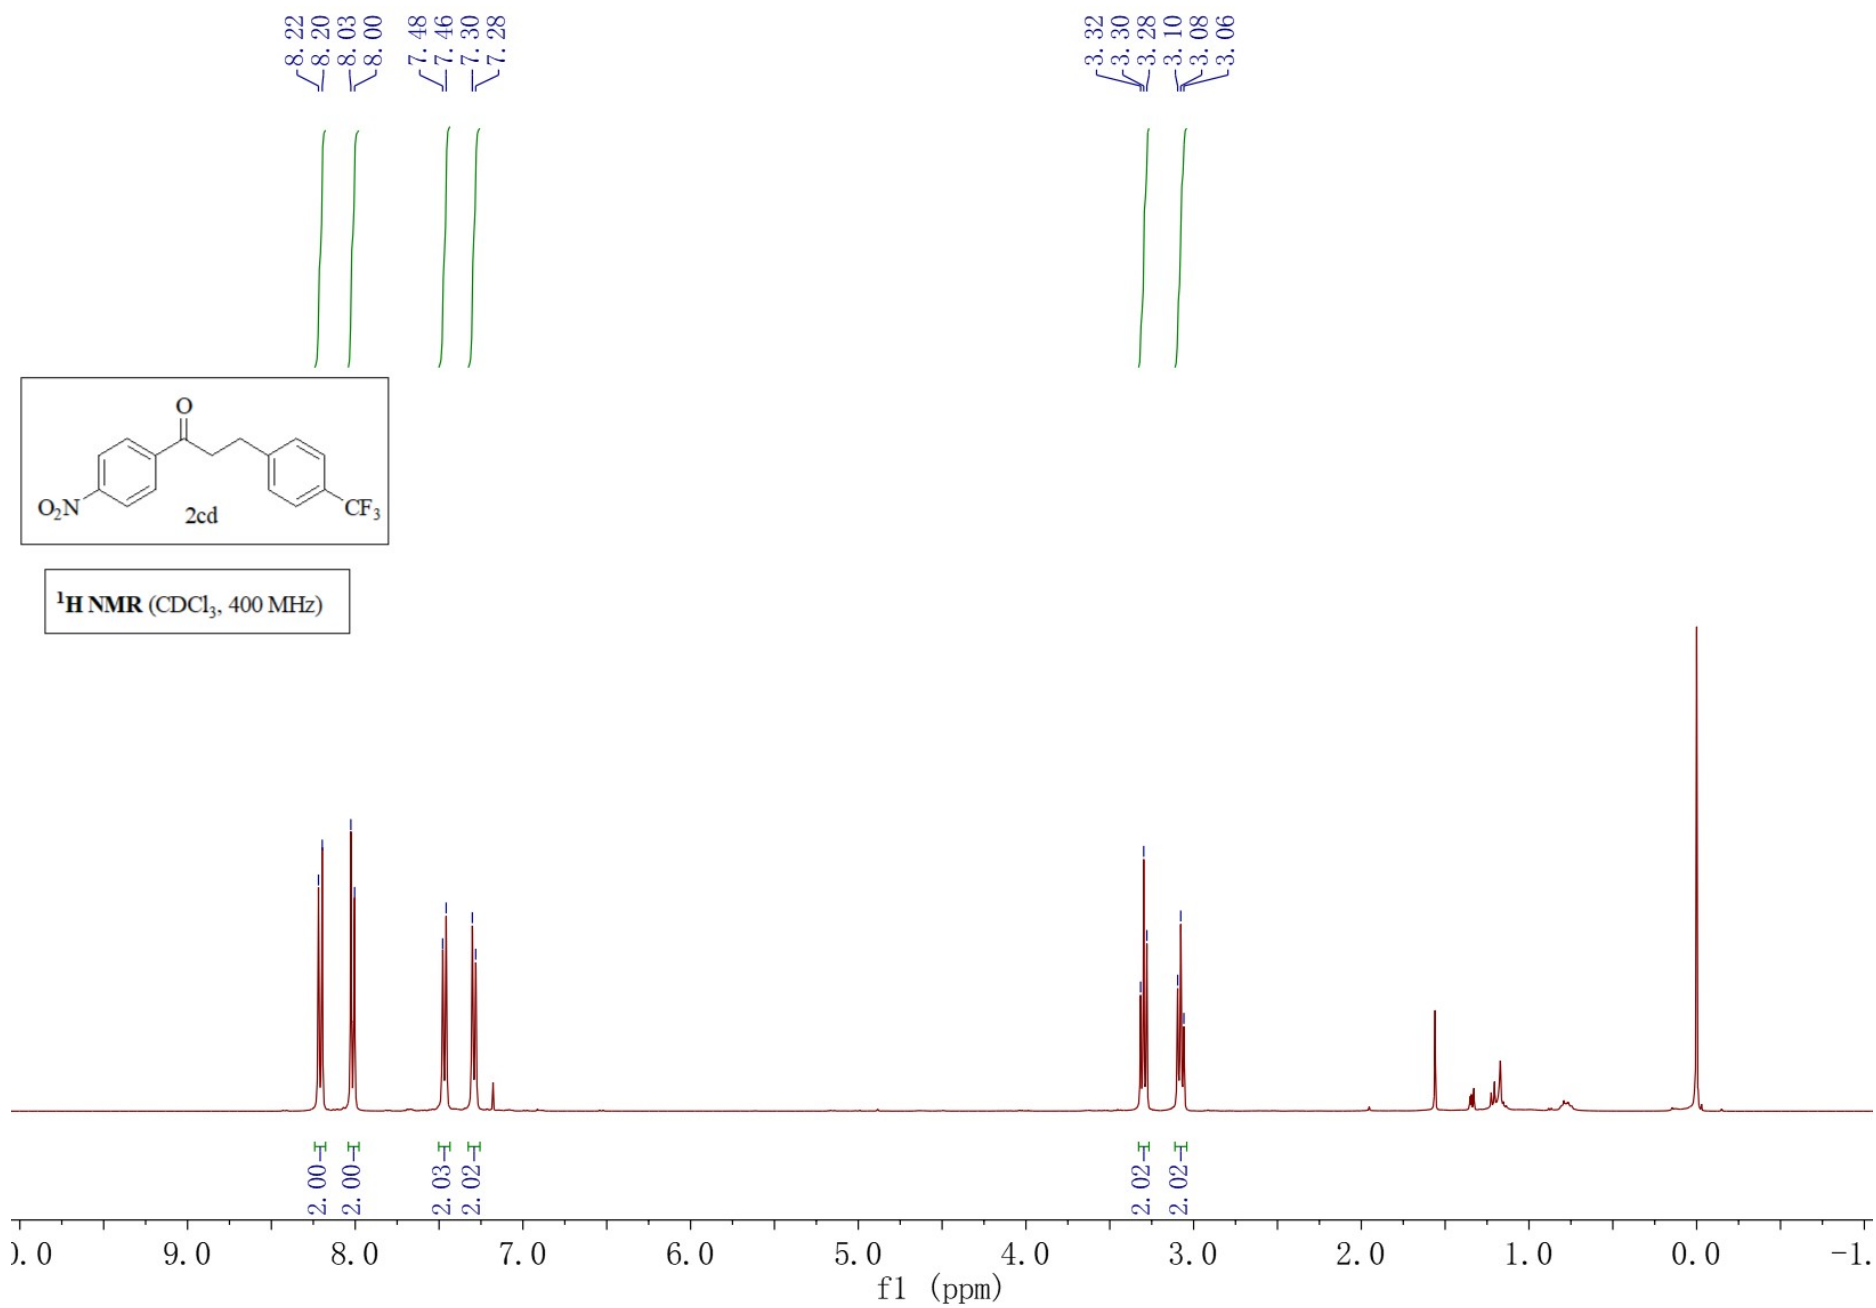

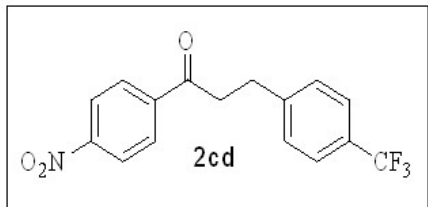

$^{13}\text{C}\{^1\text{H}\}$  NMR ( $\text{CDCl}_3$ , 75 MHz)

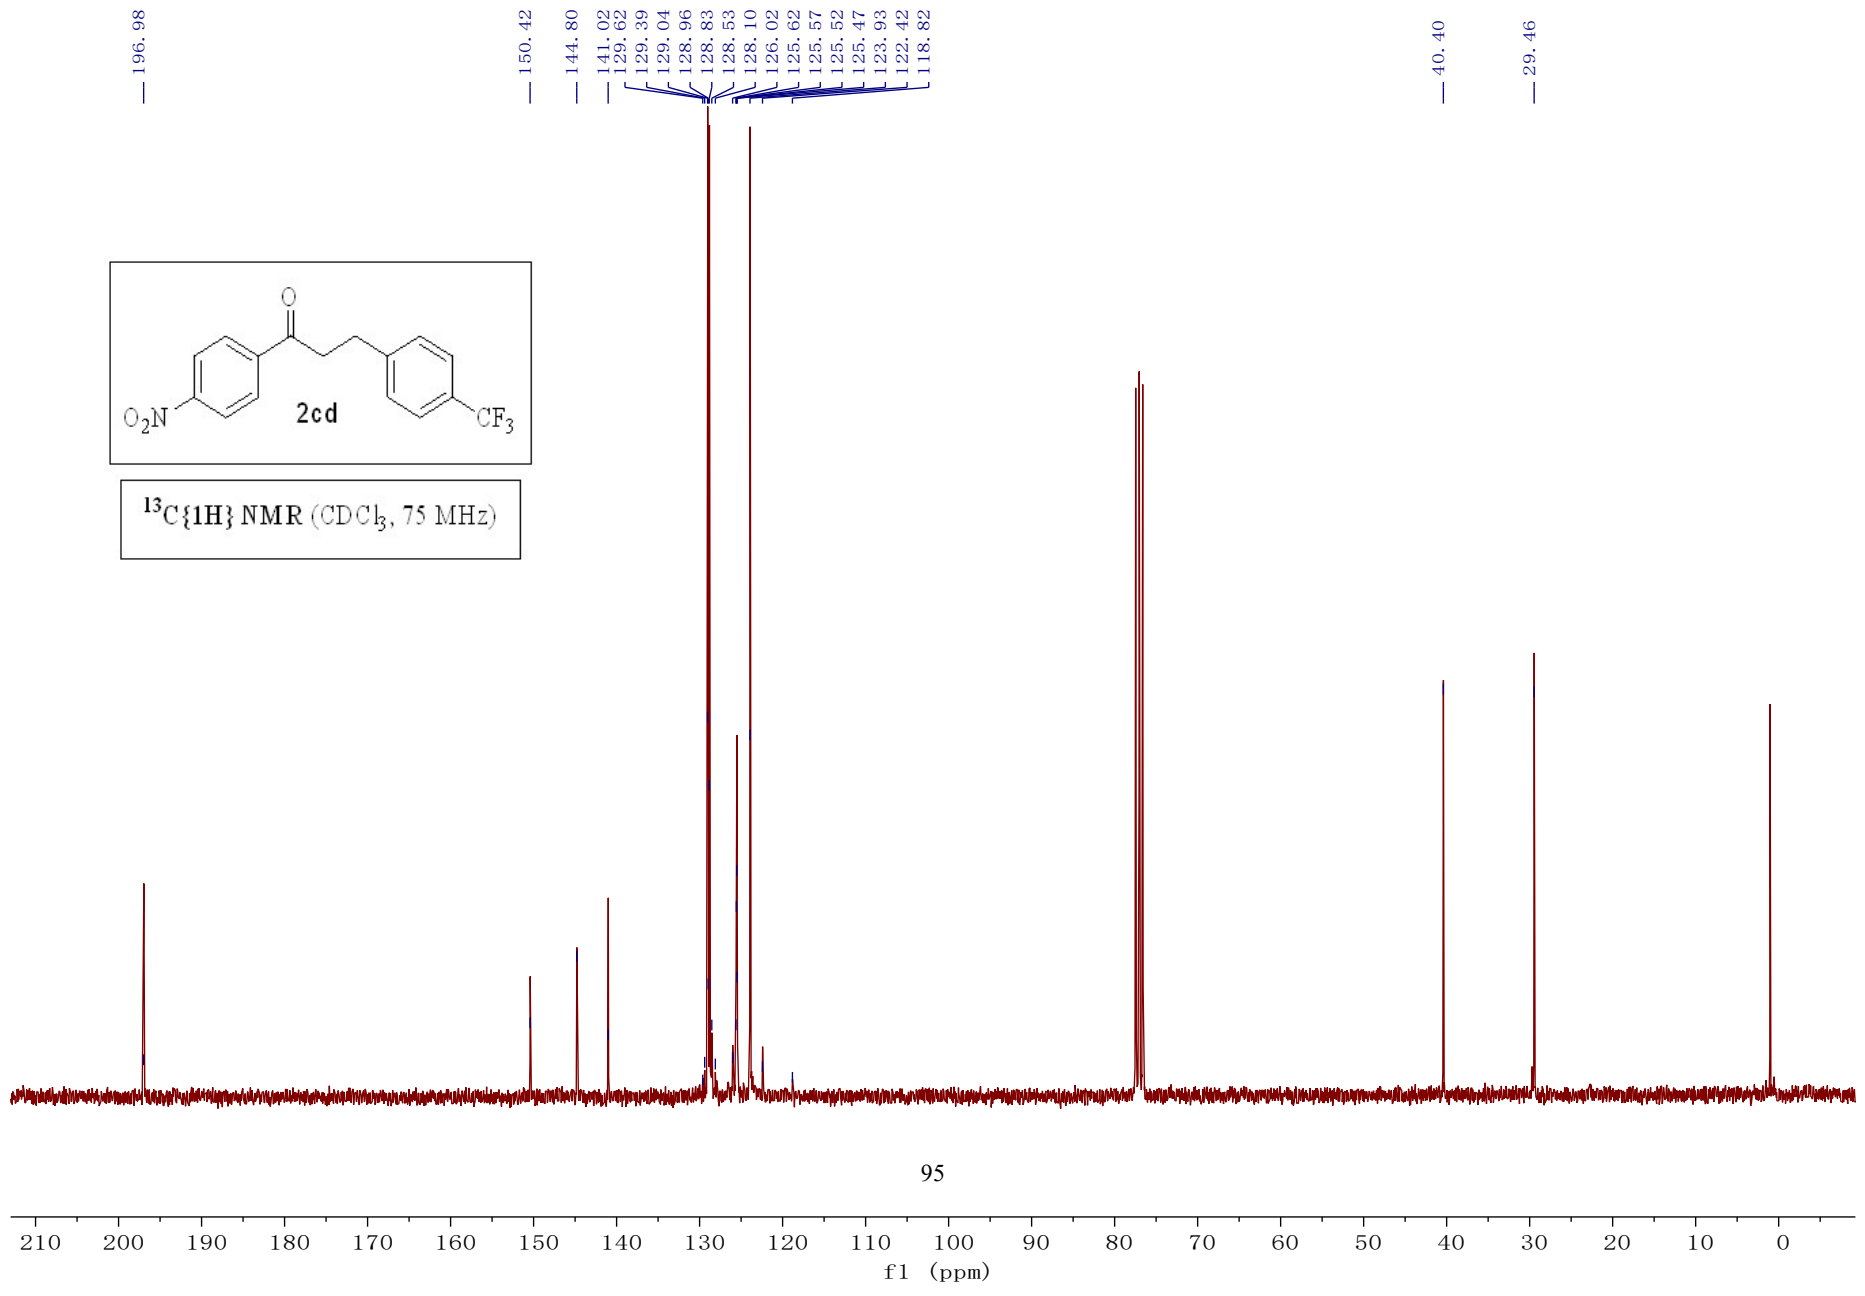

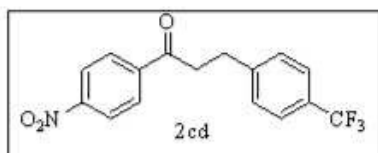

**<sup>19</sup>F NMR** (CDCl<sub>3</sub>, 282 MHz)

-62.38

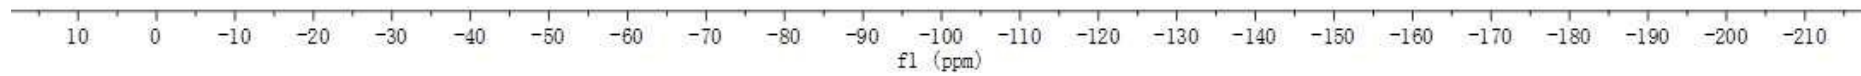

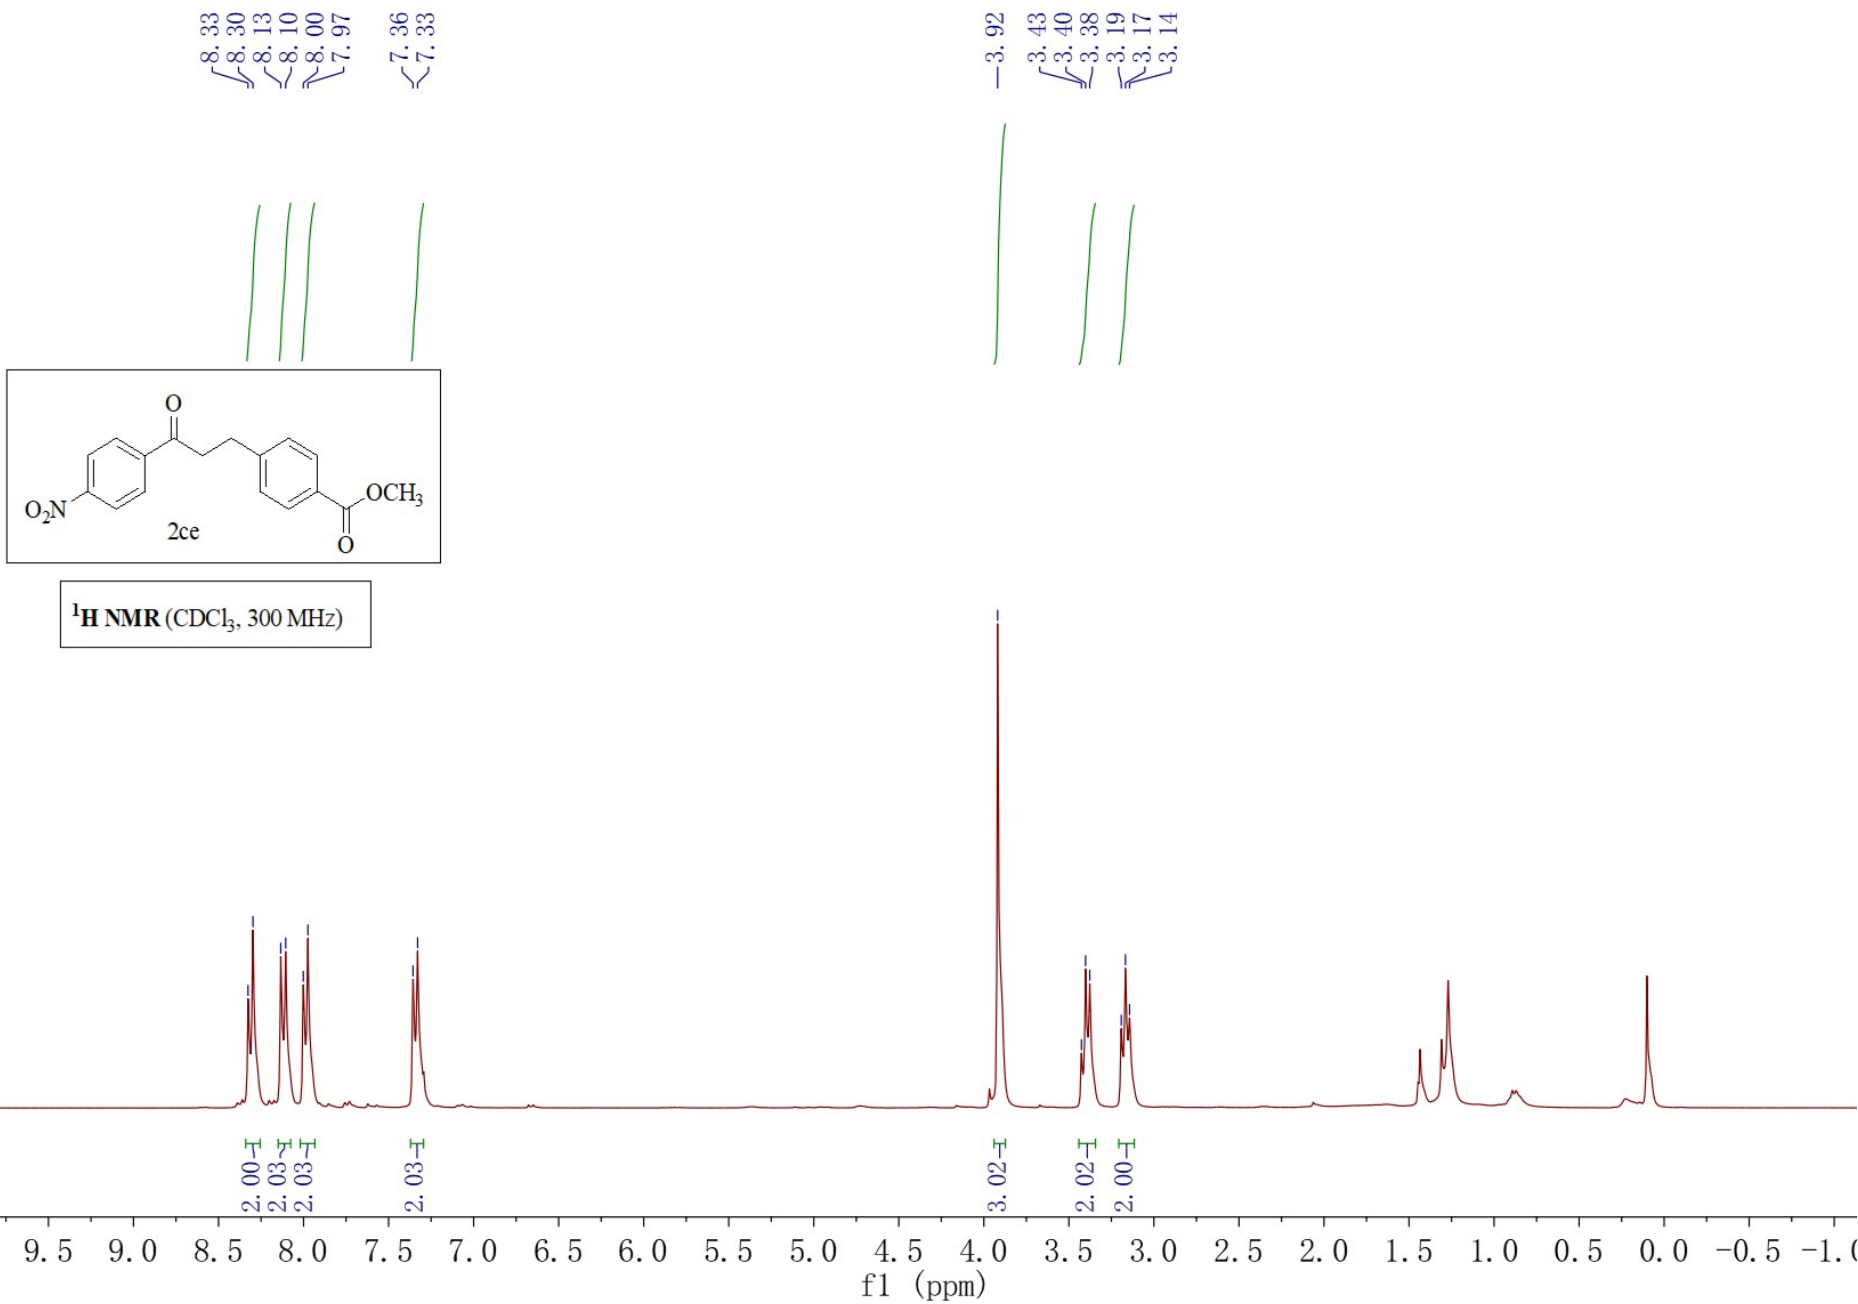

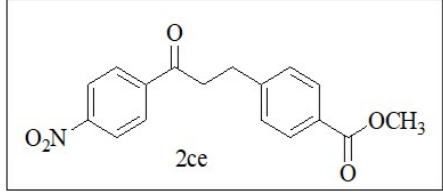

$^{13}\text{C}\{^1\text{H}\}$  NMR ( $\text{CDCl}_3$ , 75 MHz)

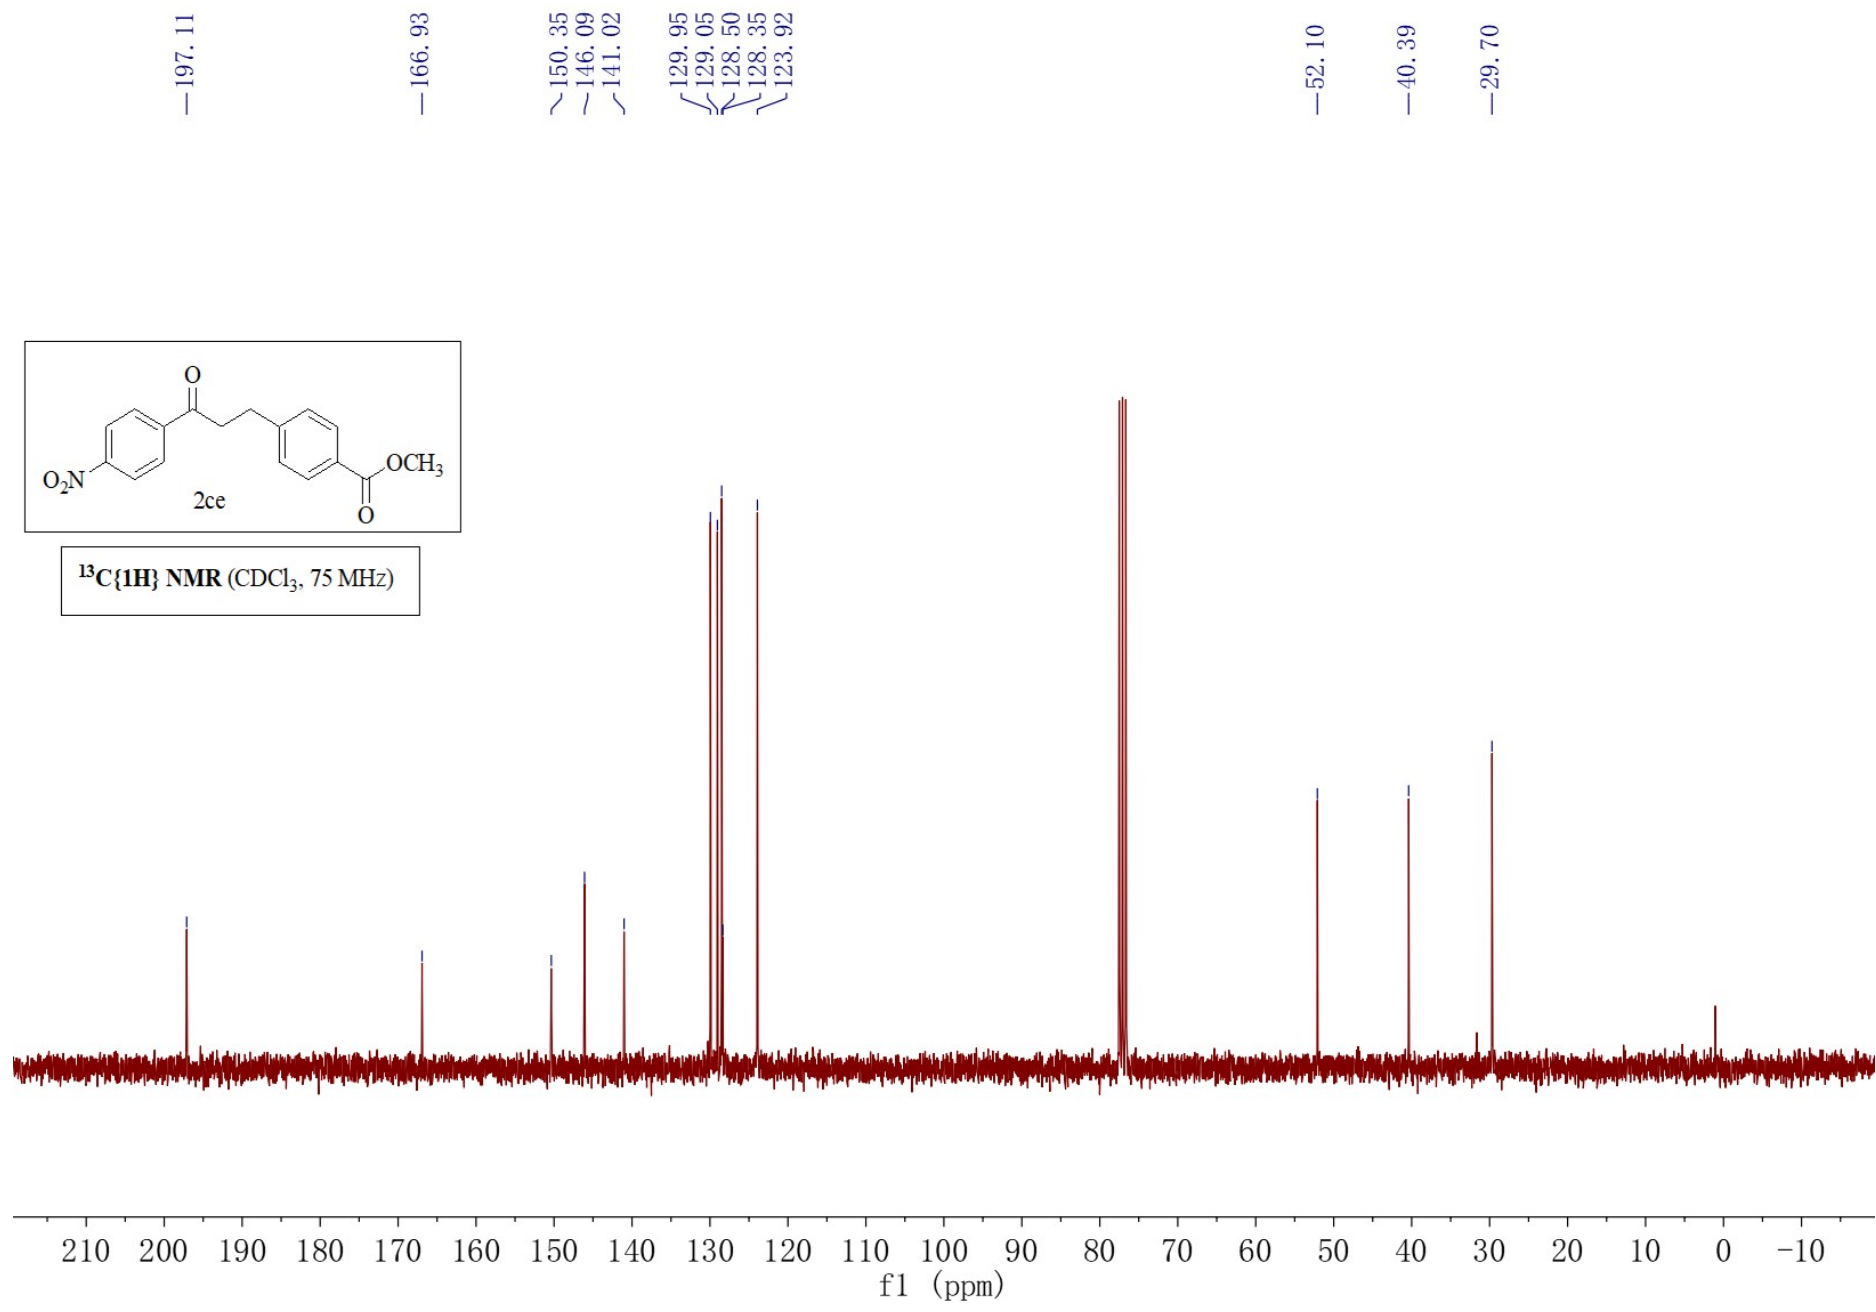

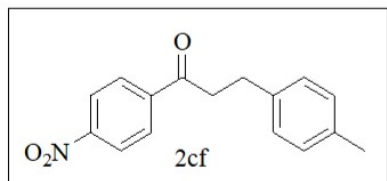

$^1\text{H NMR}$  ( $\text{CDCl}_3$ , 400 MHz)

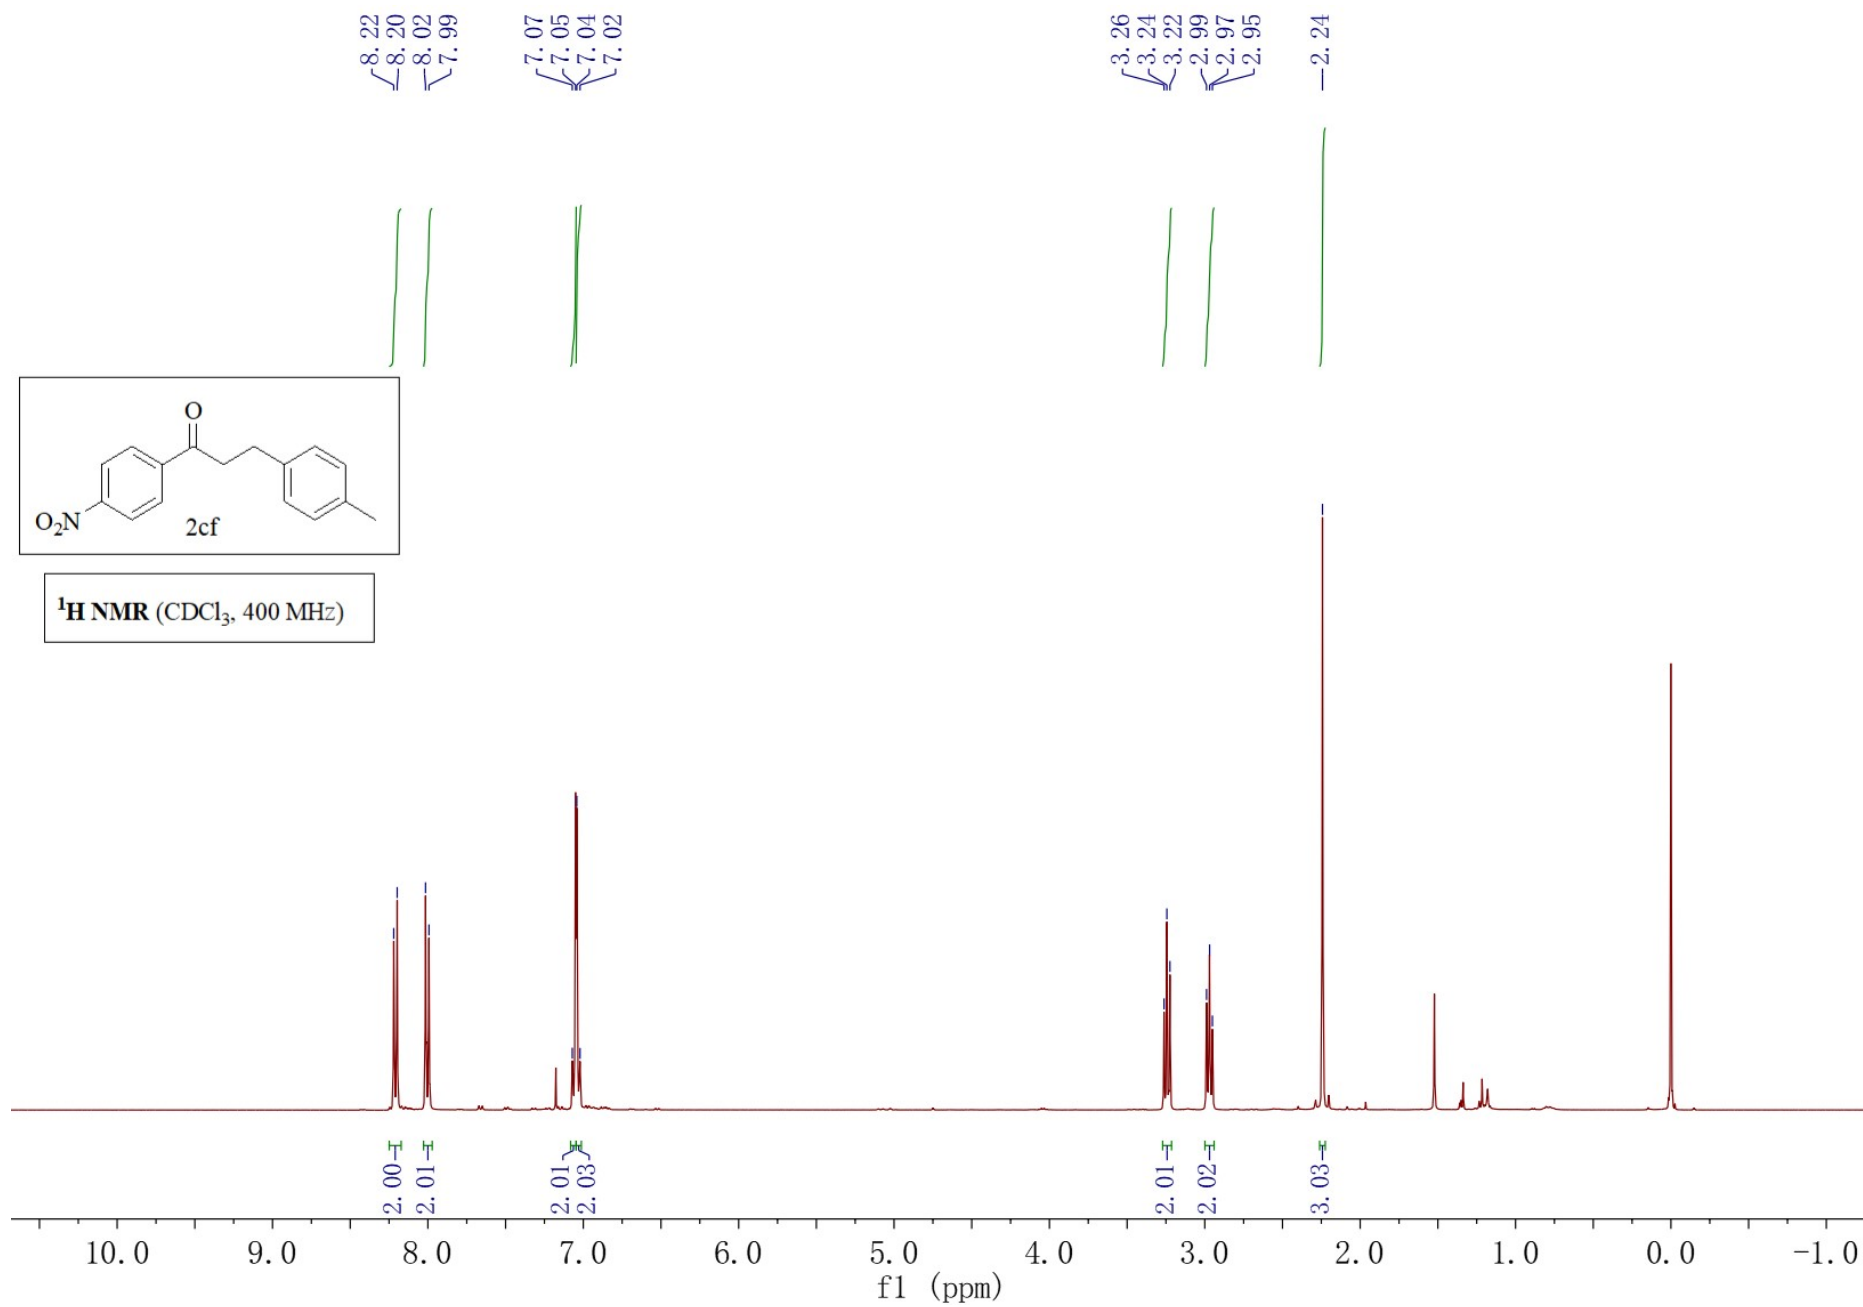

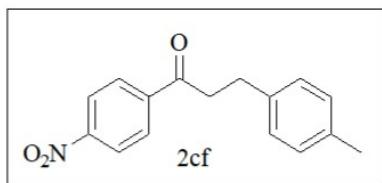

$^{13}\text{C}\{^1\text{H}\}$  NMR ( $\text{CDCl}_3$ , 75 MHz)

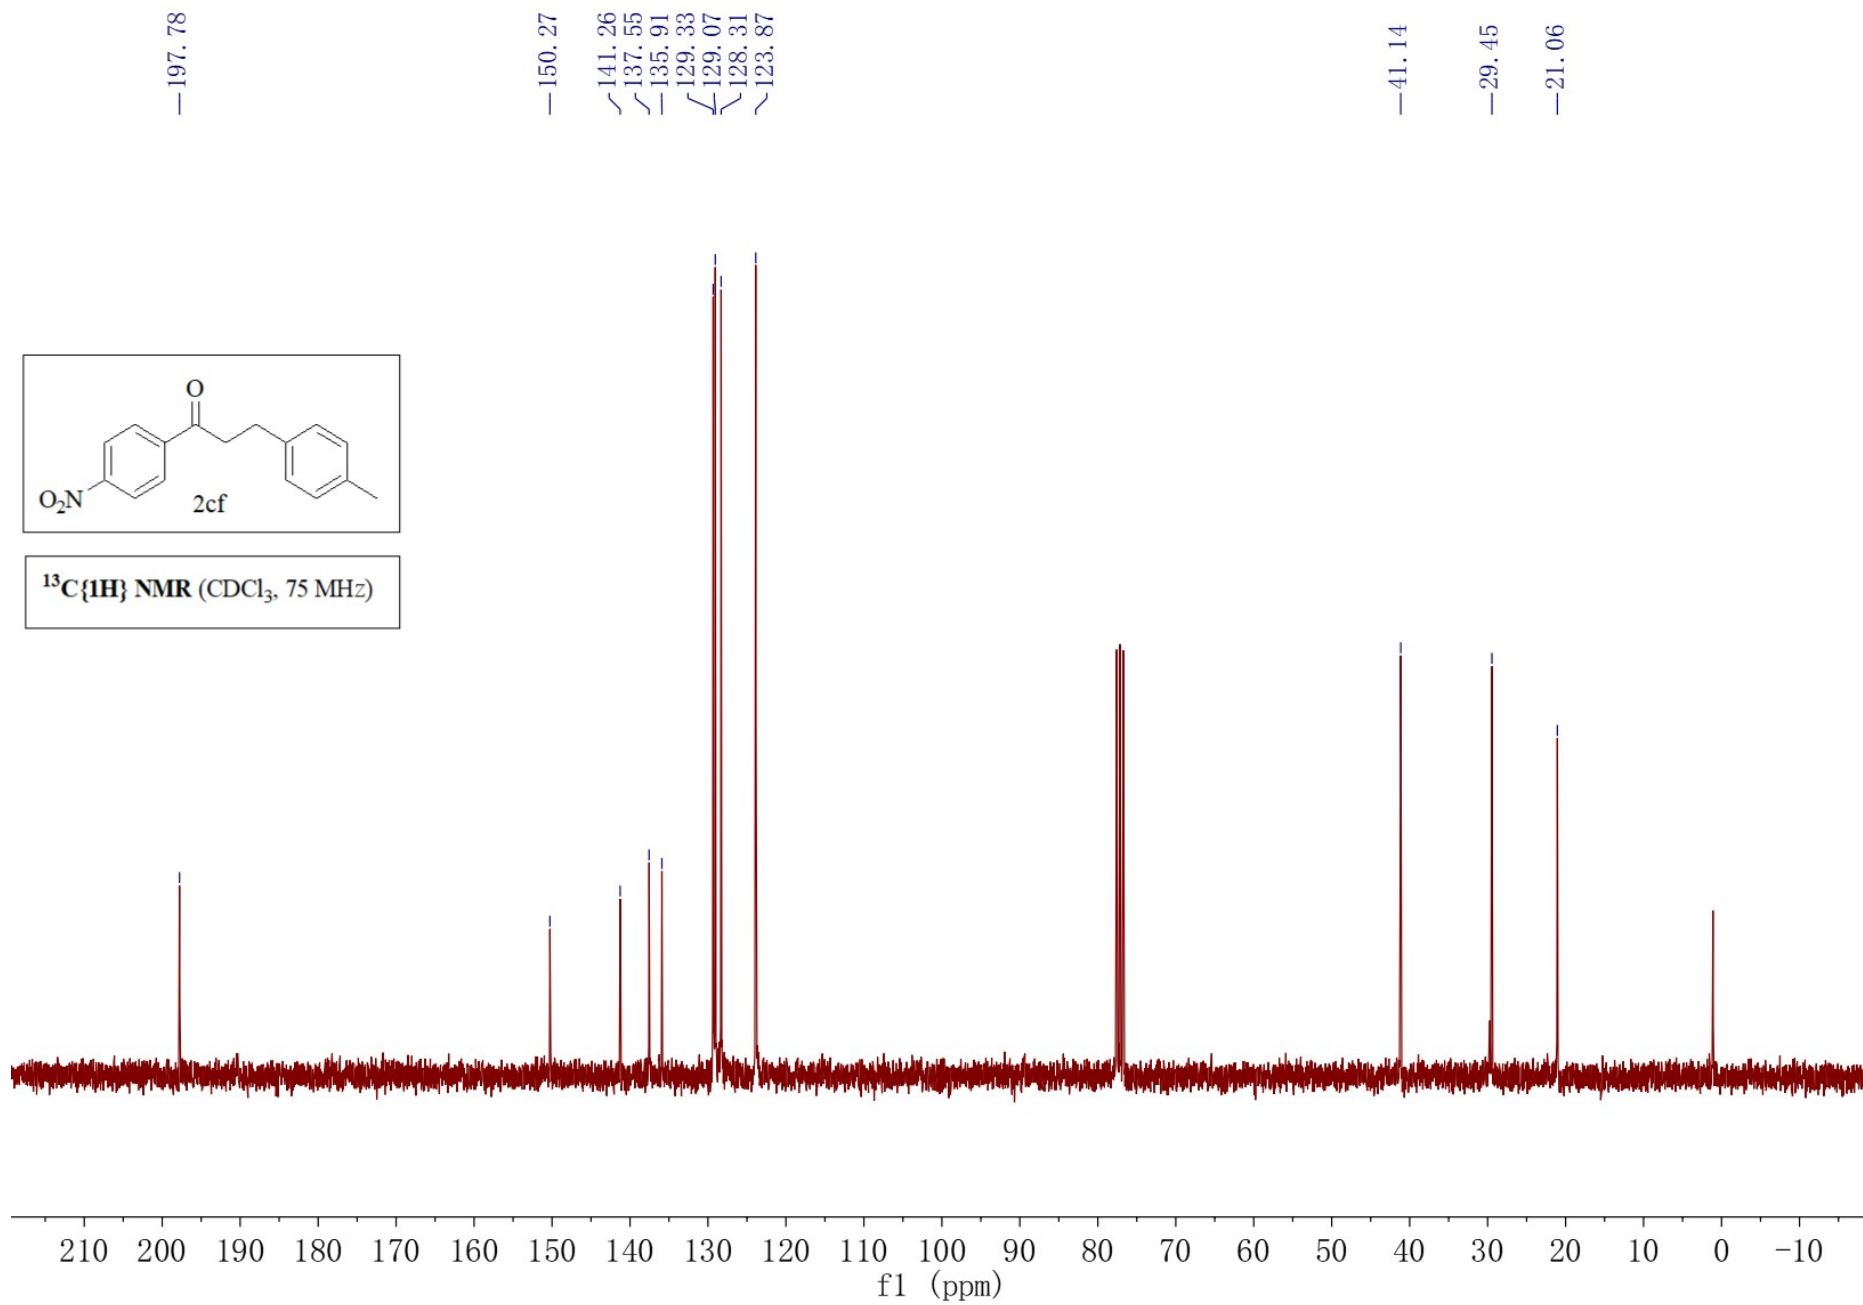



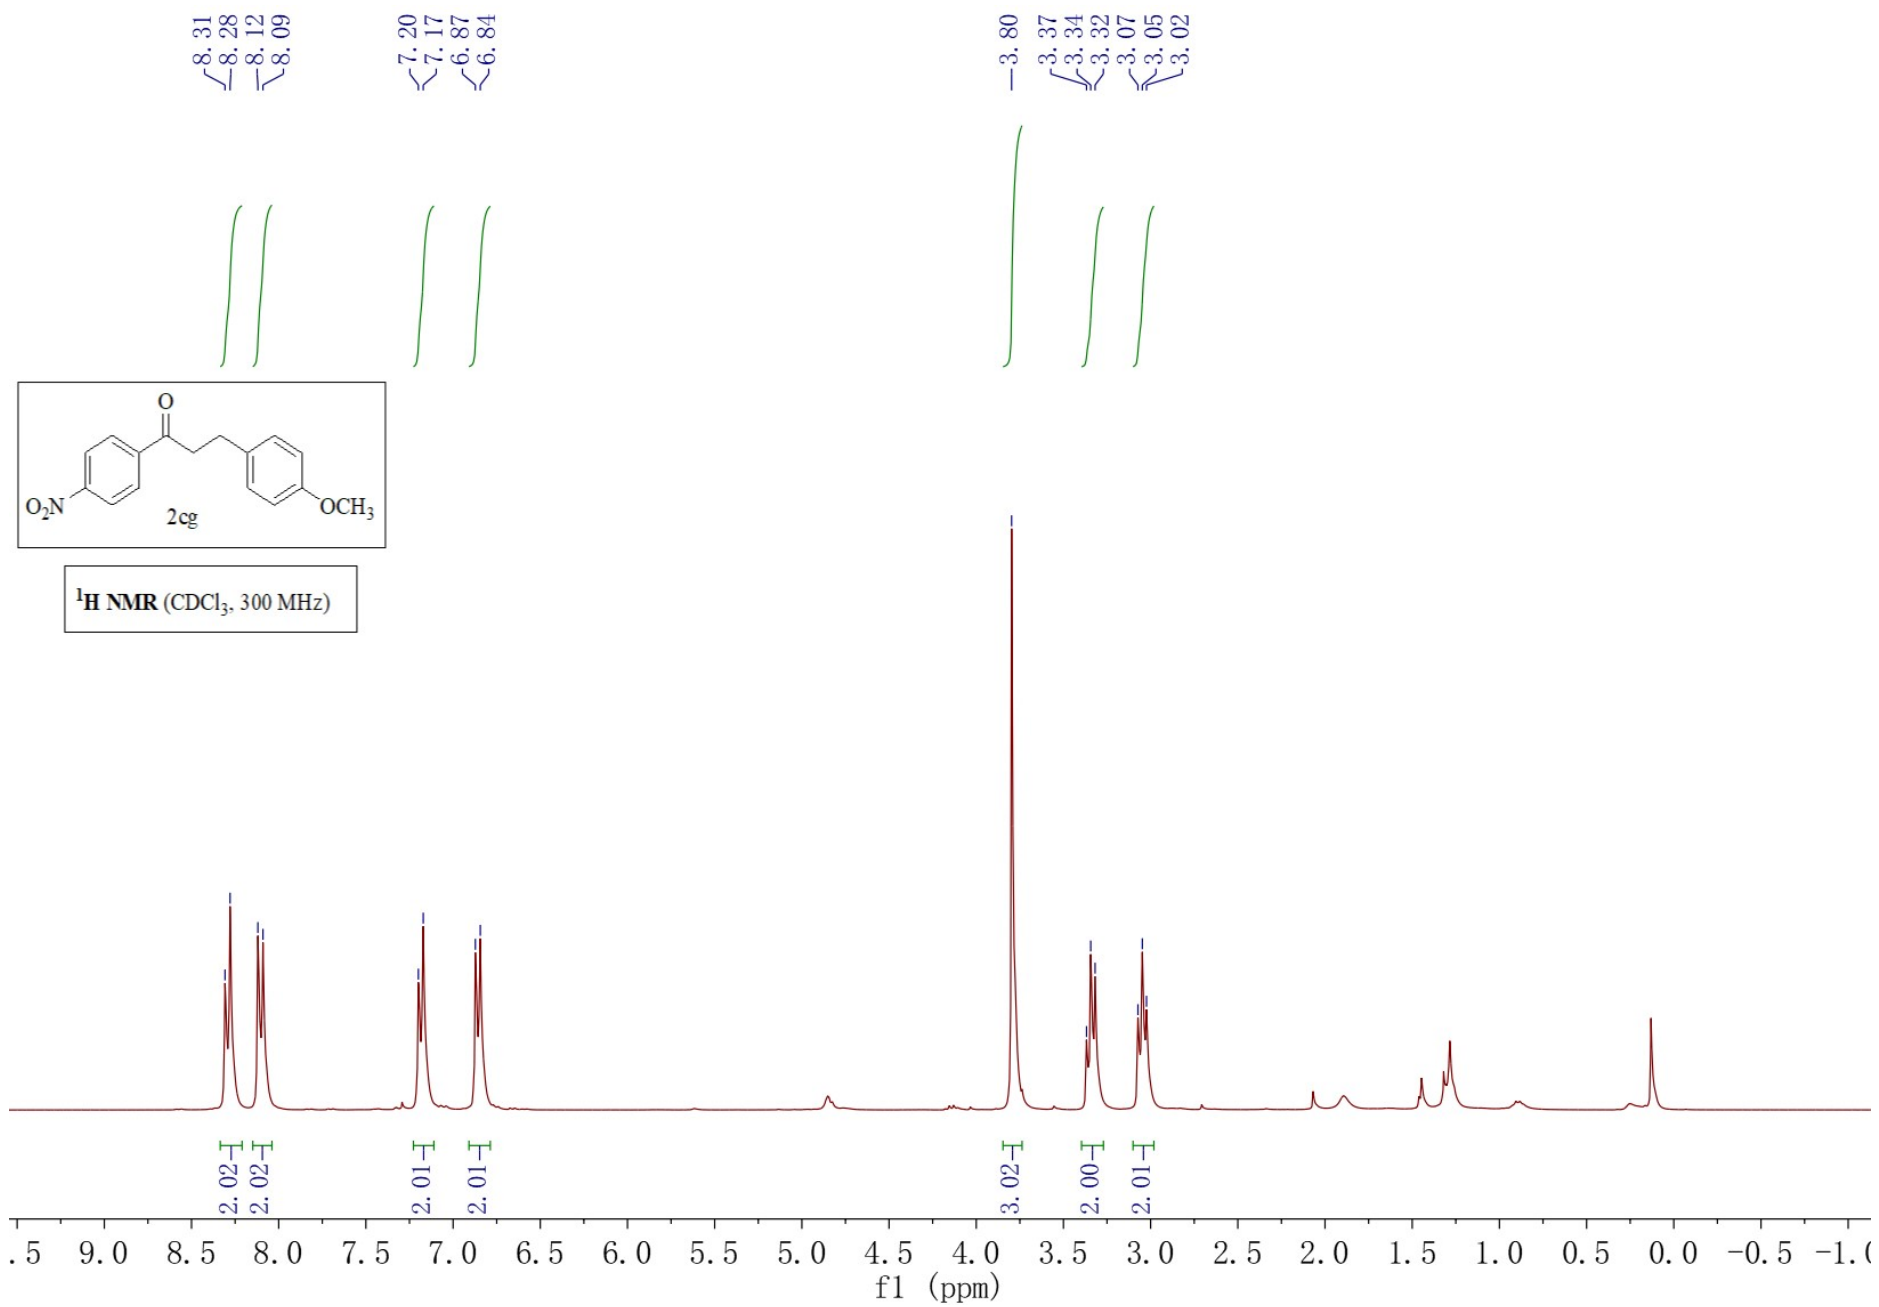

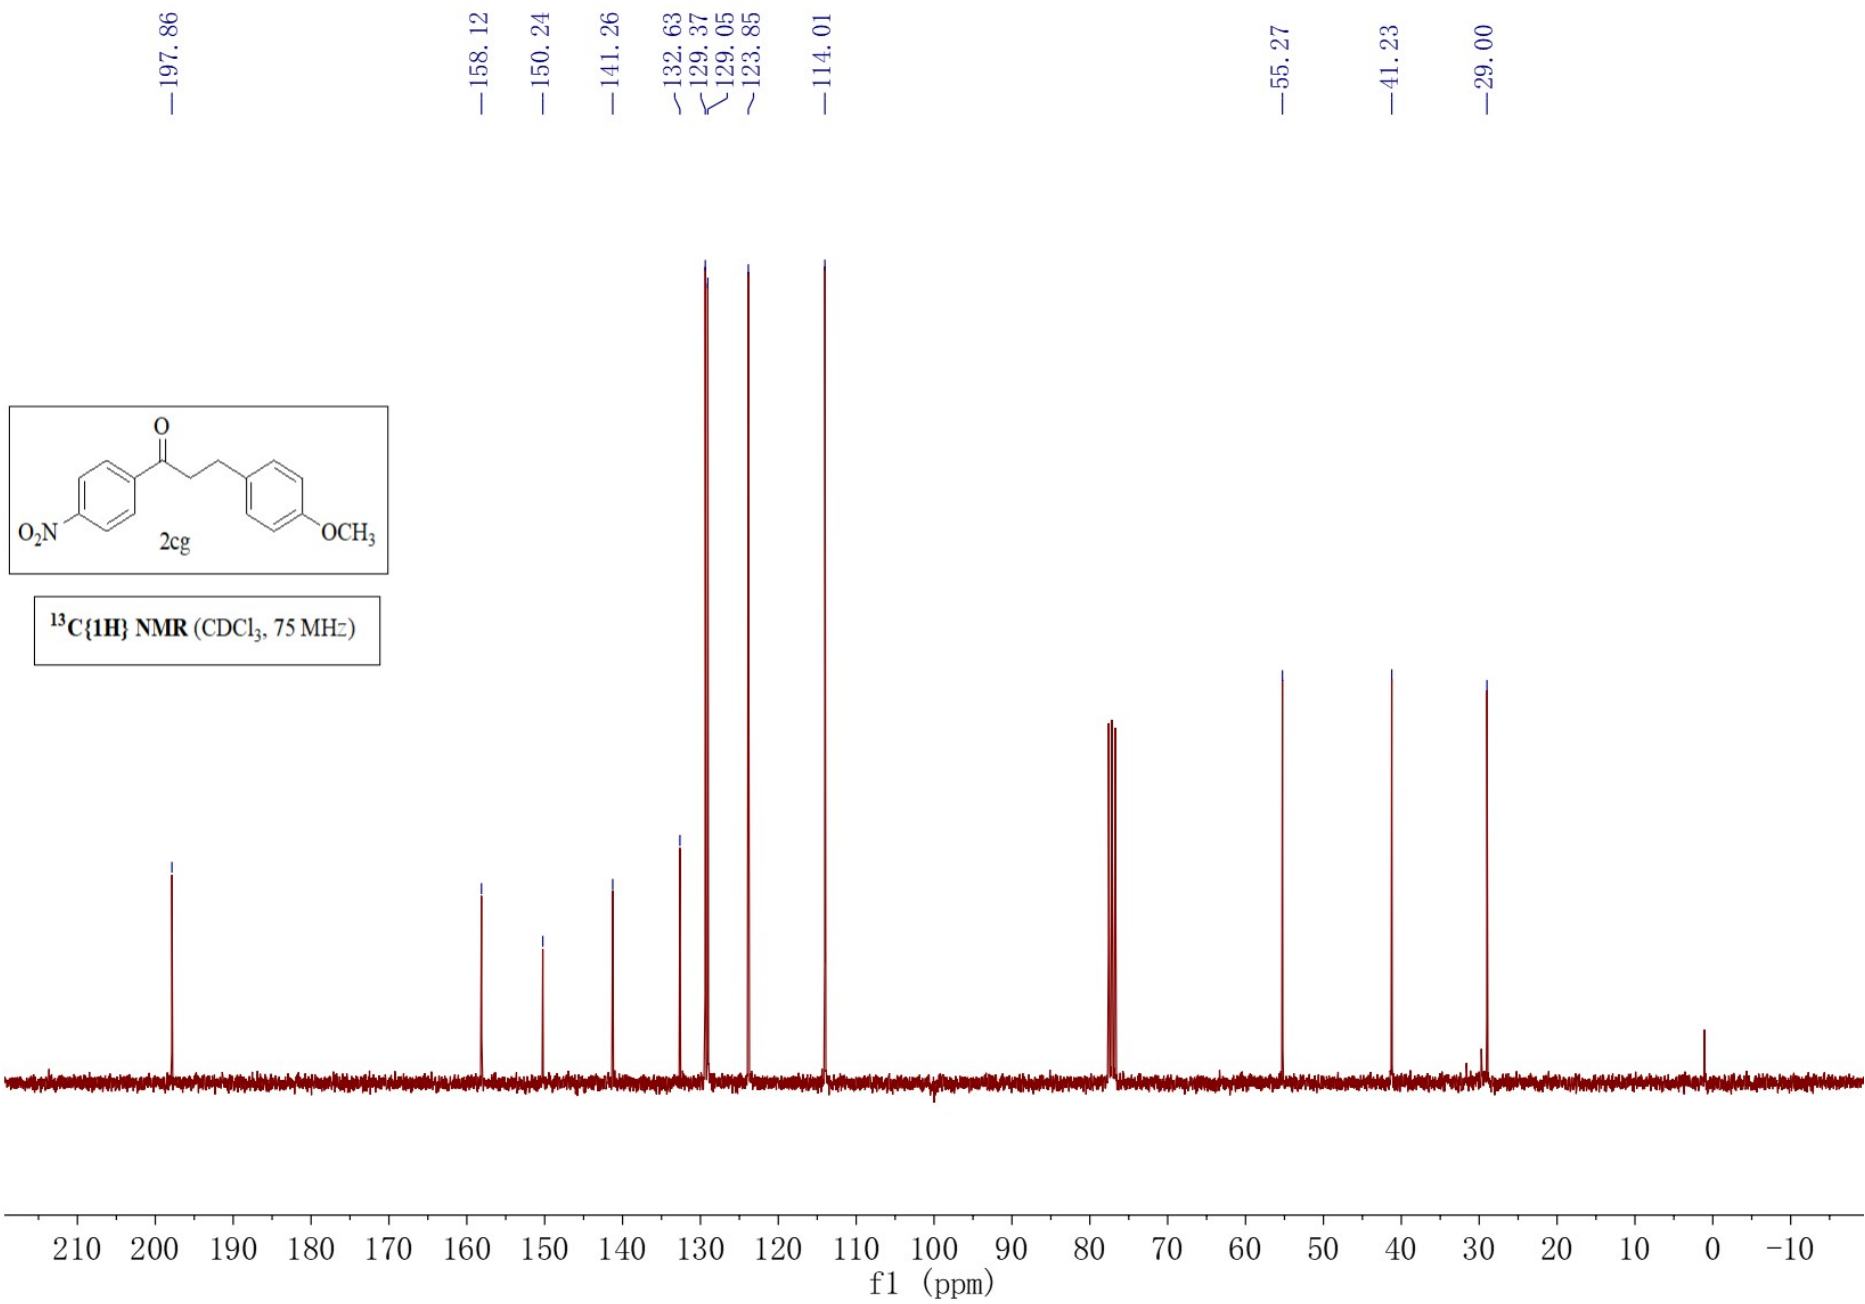

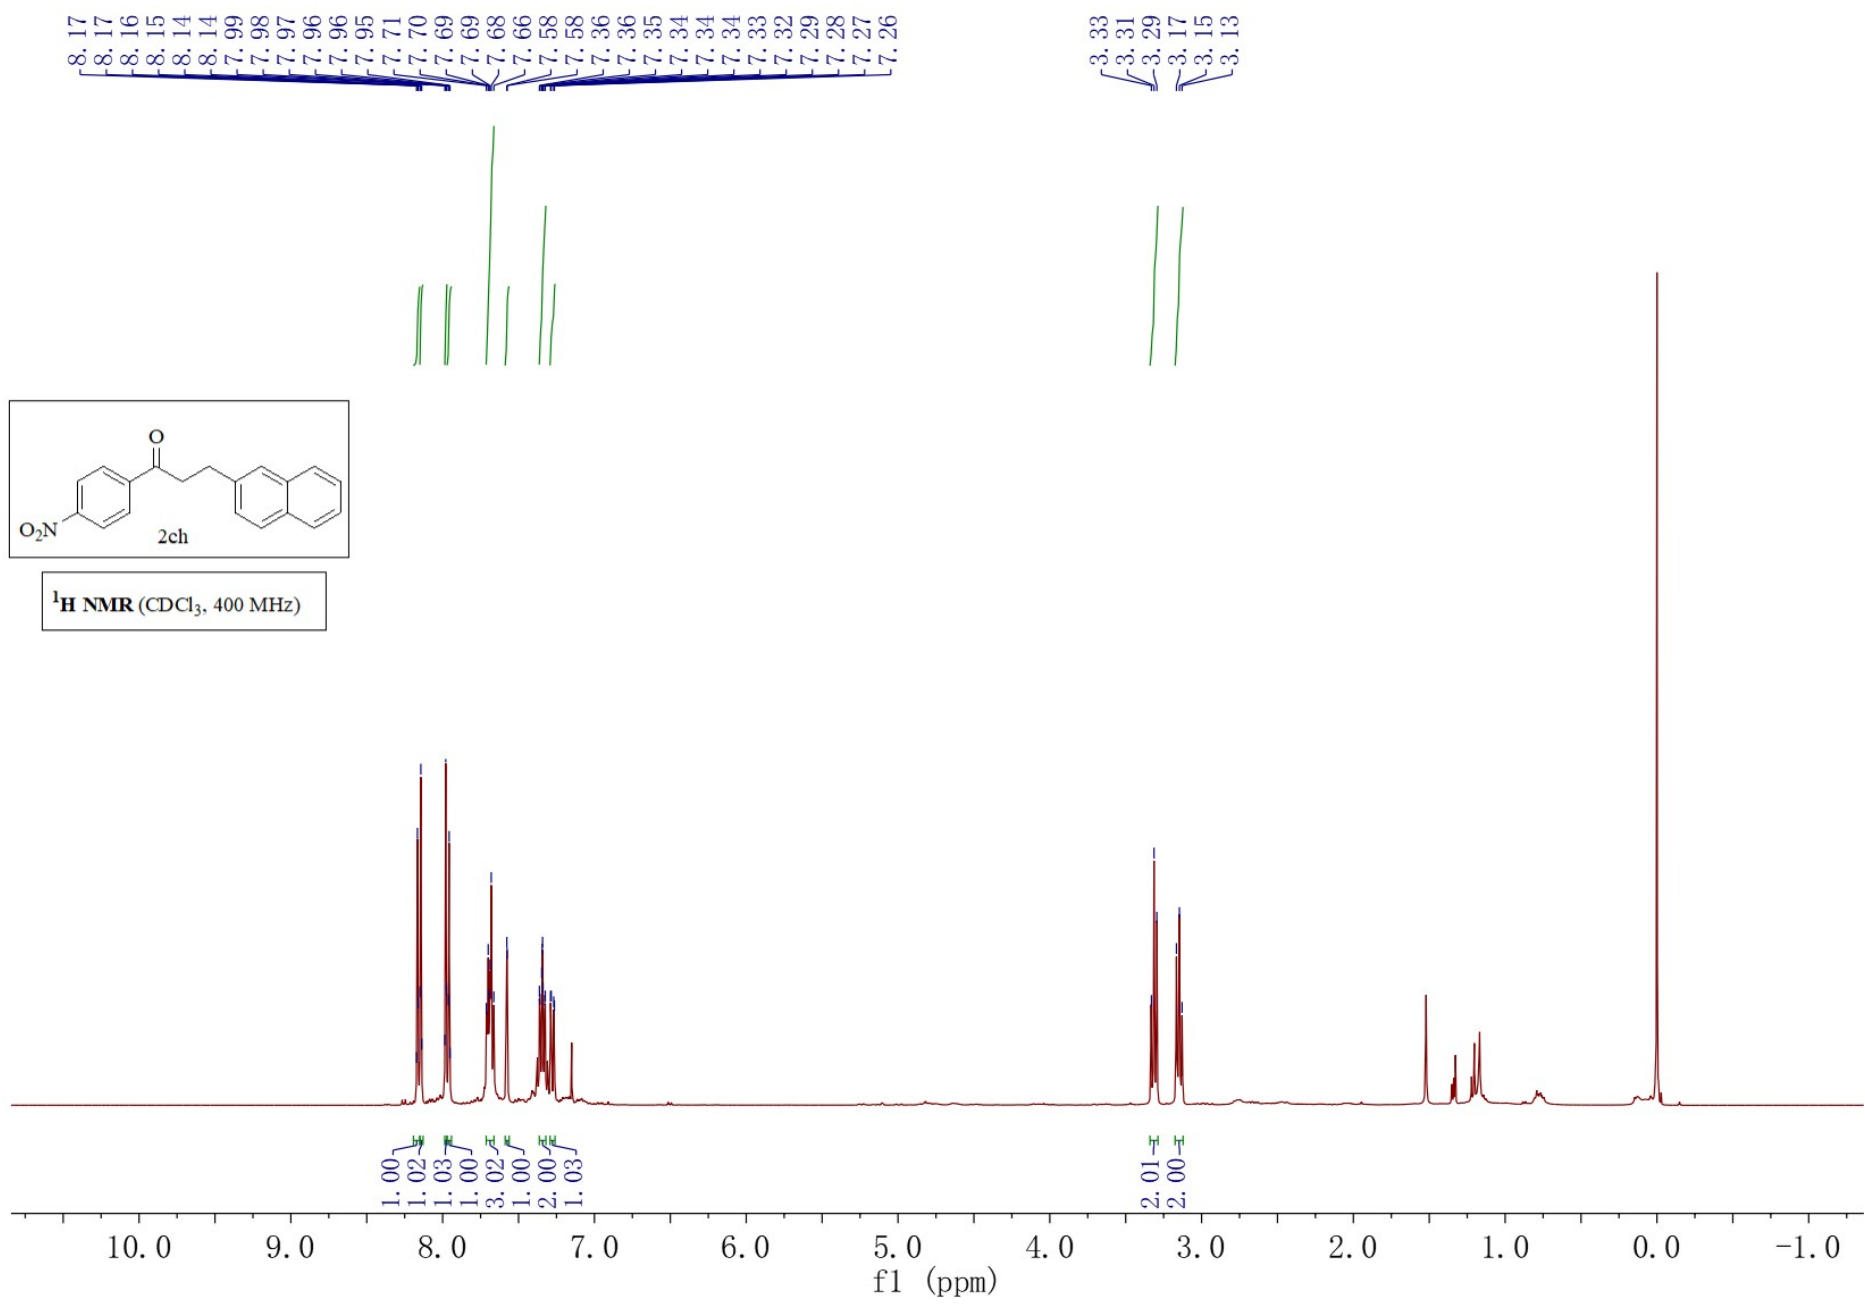

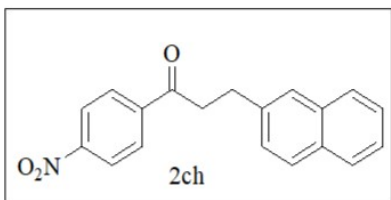

$^{13}\text{C}\{^1\text{H}\}$  NMR ( $\text{CDCl}_3$ , 75 MHz)

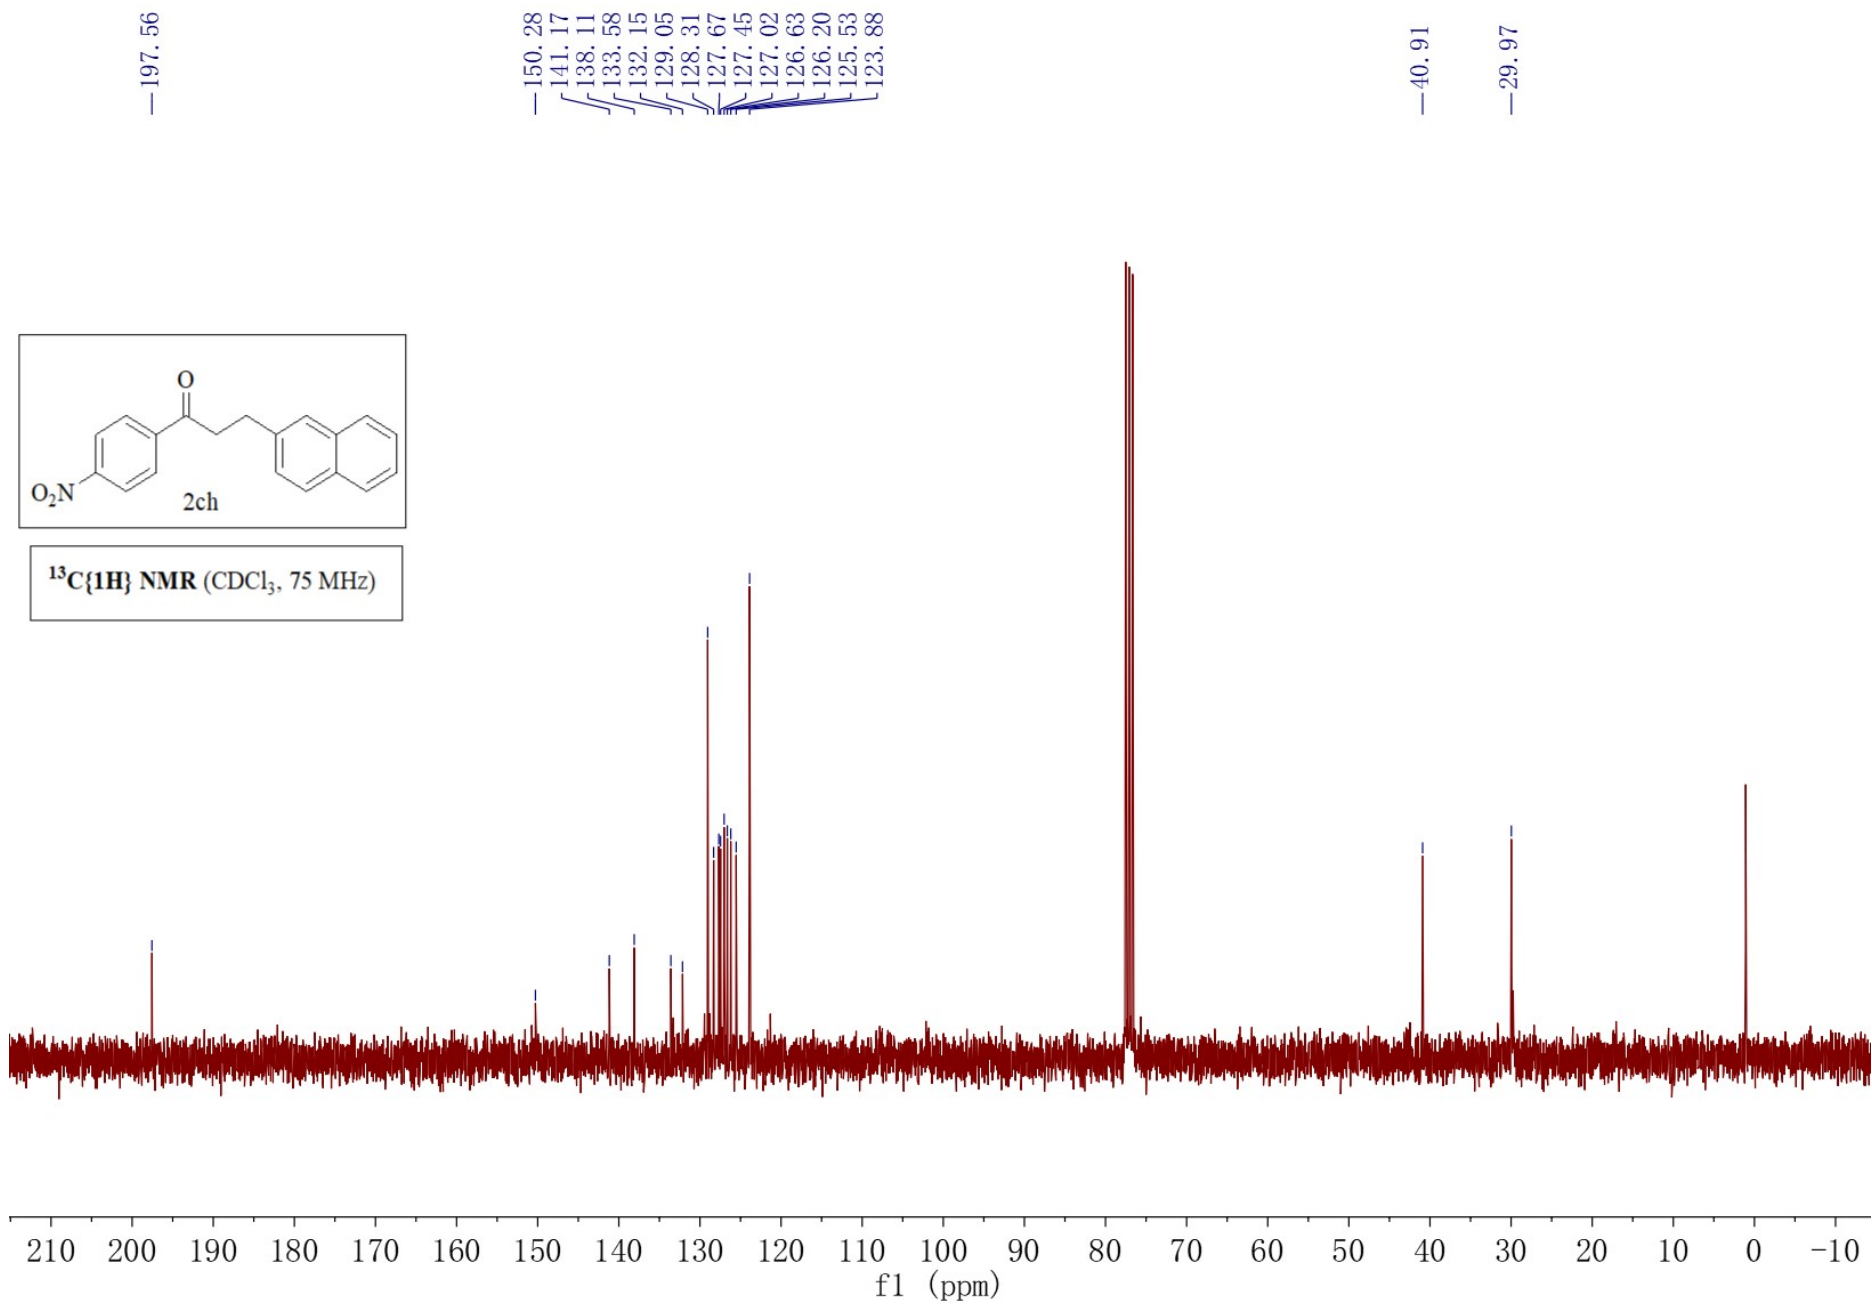

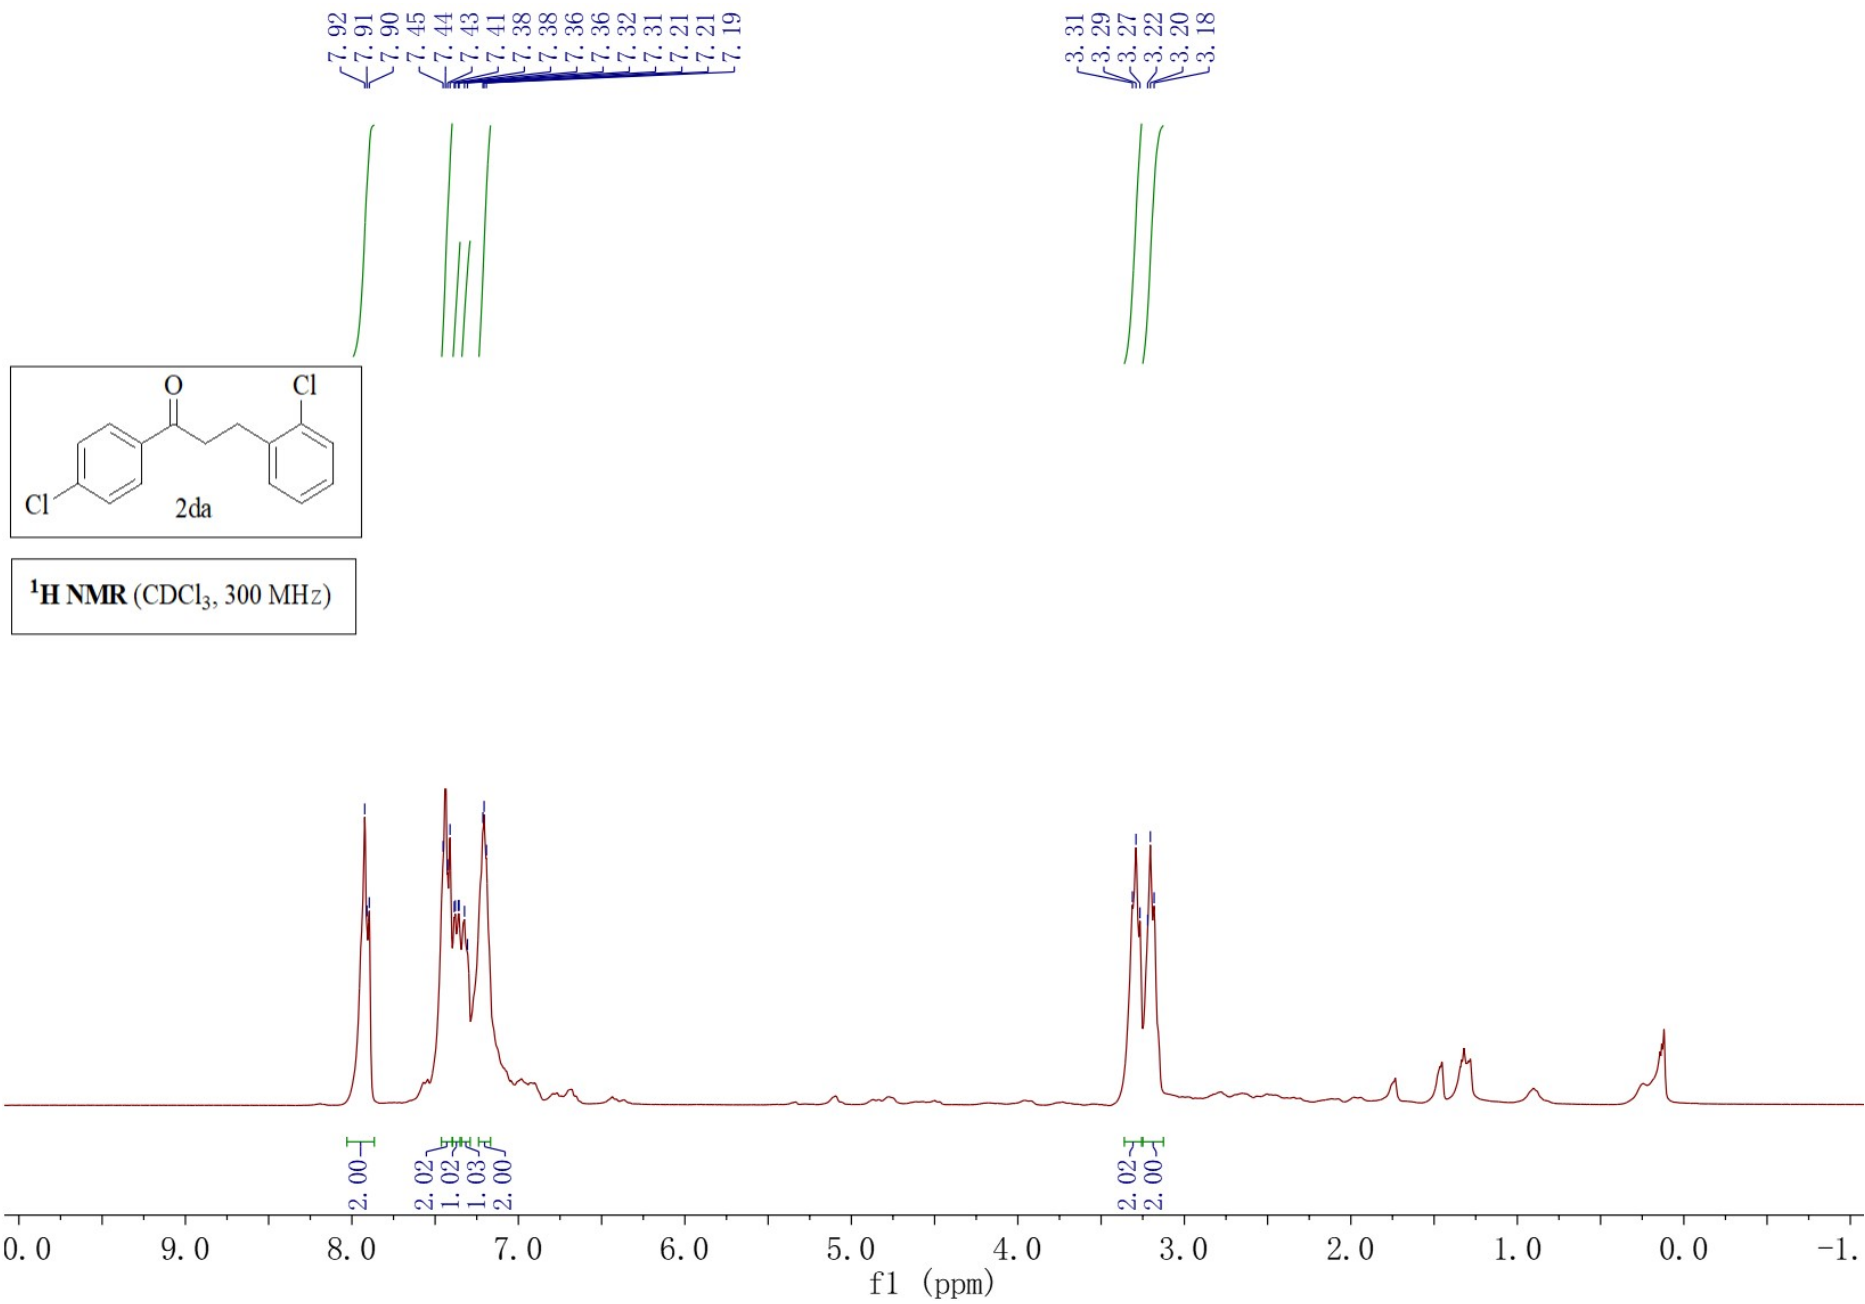

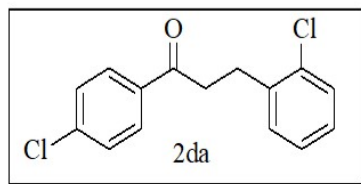

$^{13}\text{C}\{^1\text{H}\}$  NMR ( $\text{CDCl}_3$ , 75 MHz)

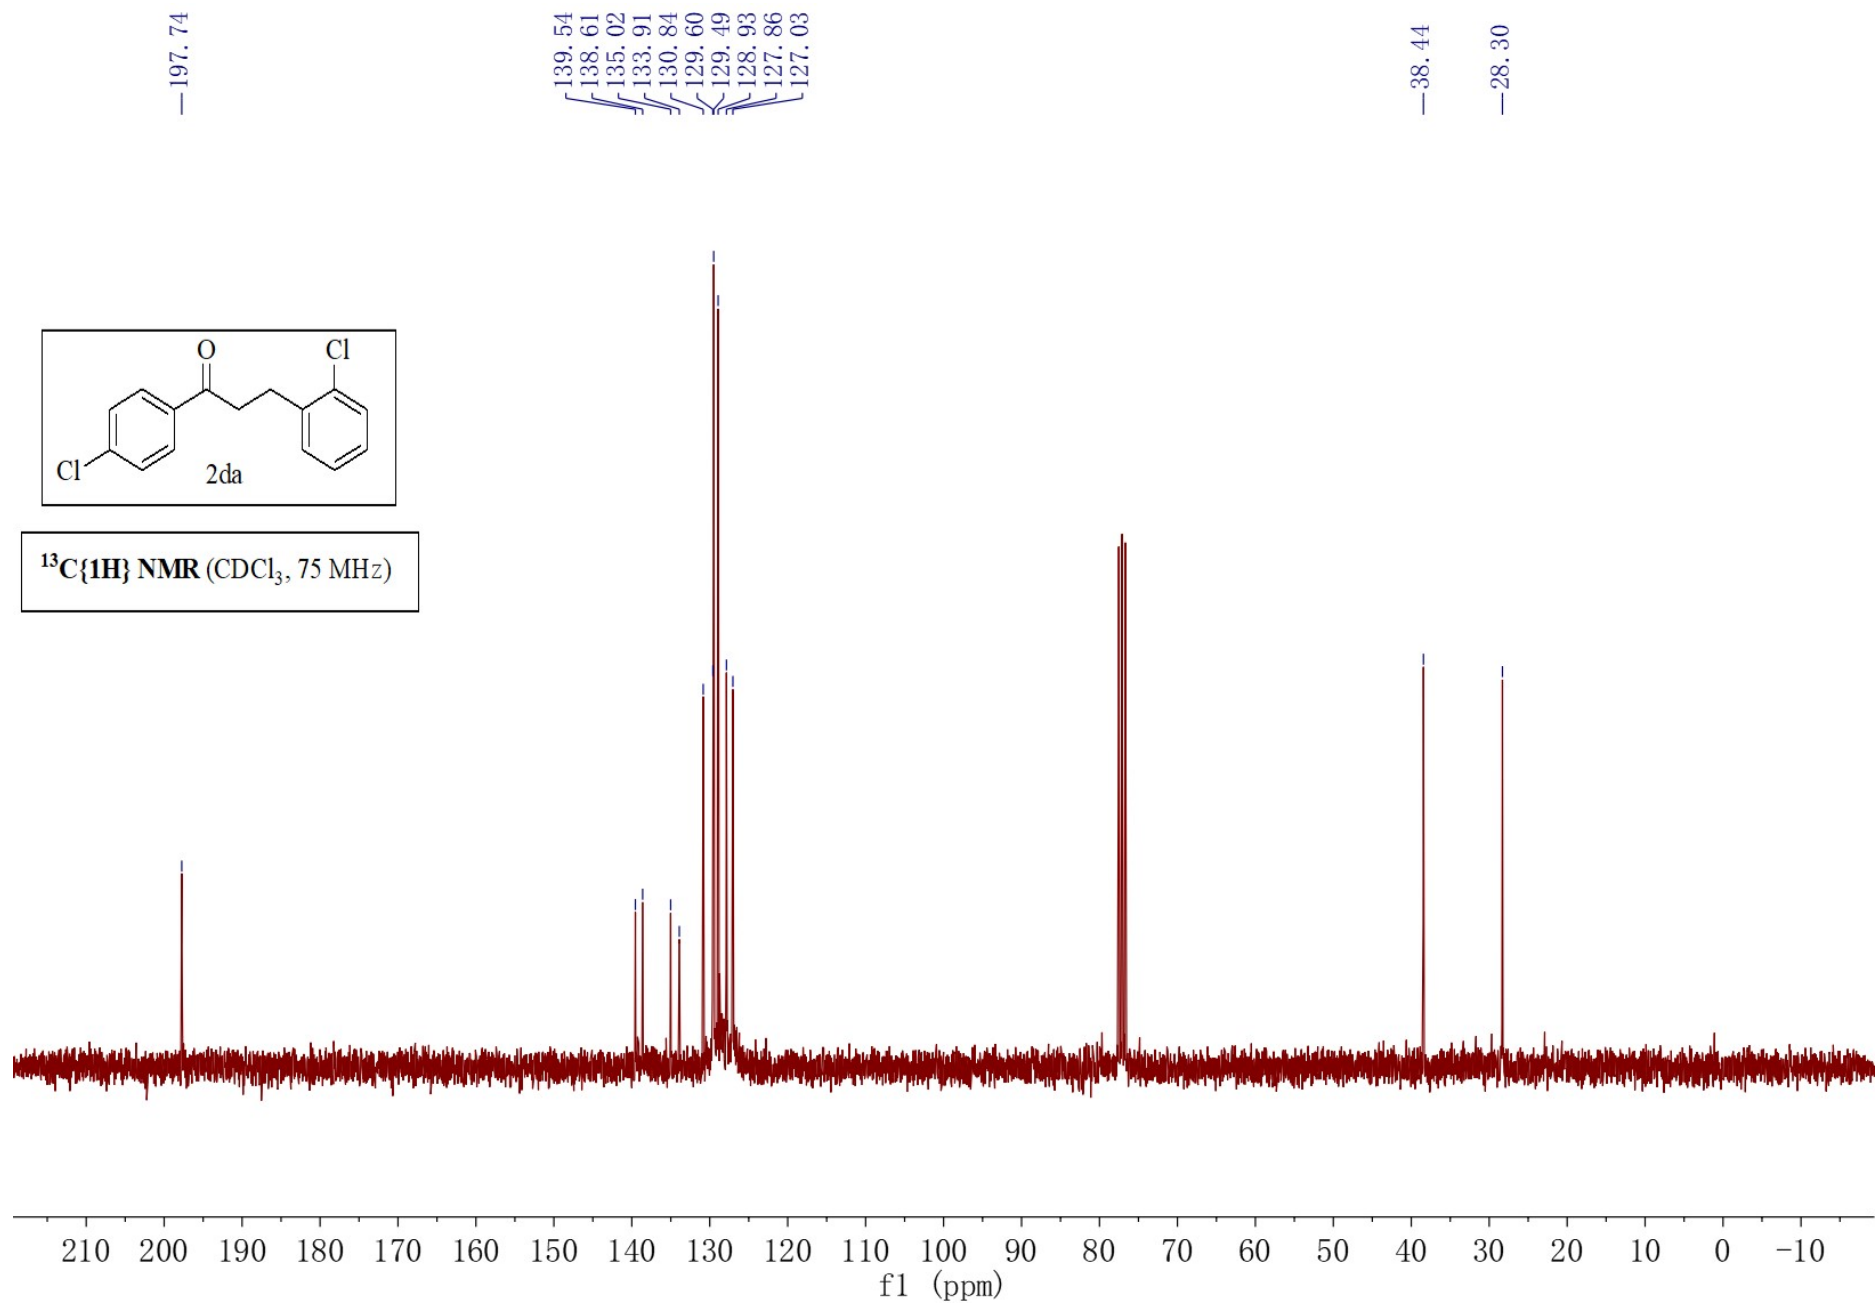

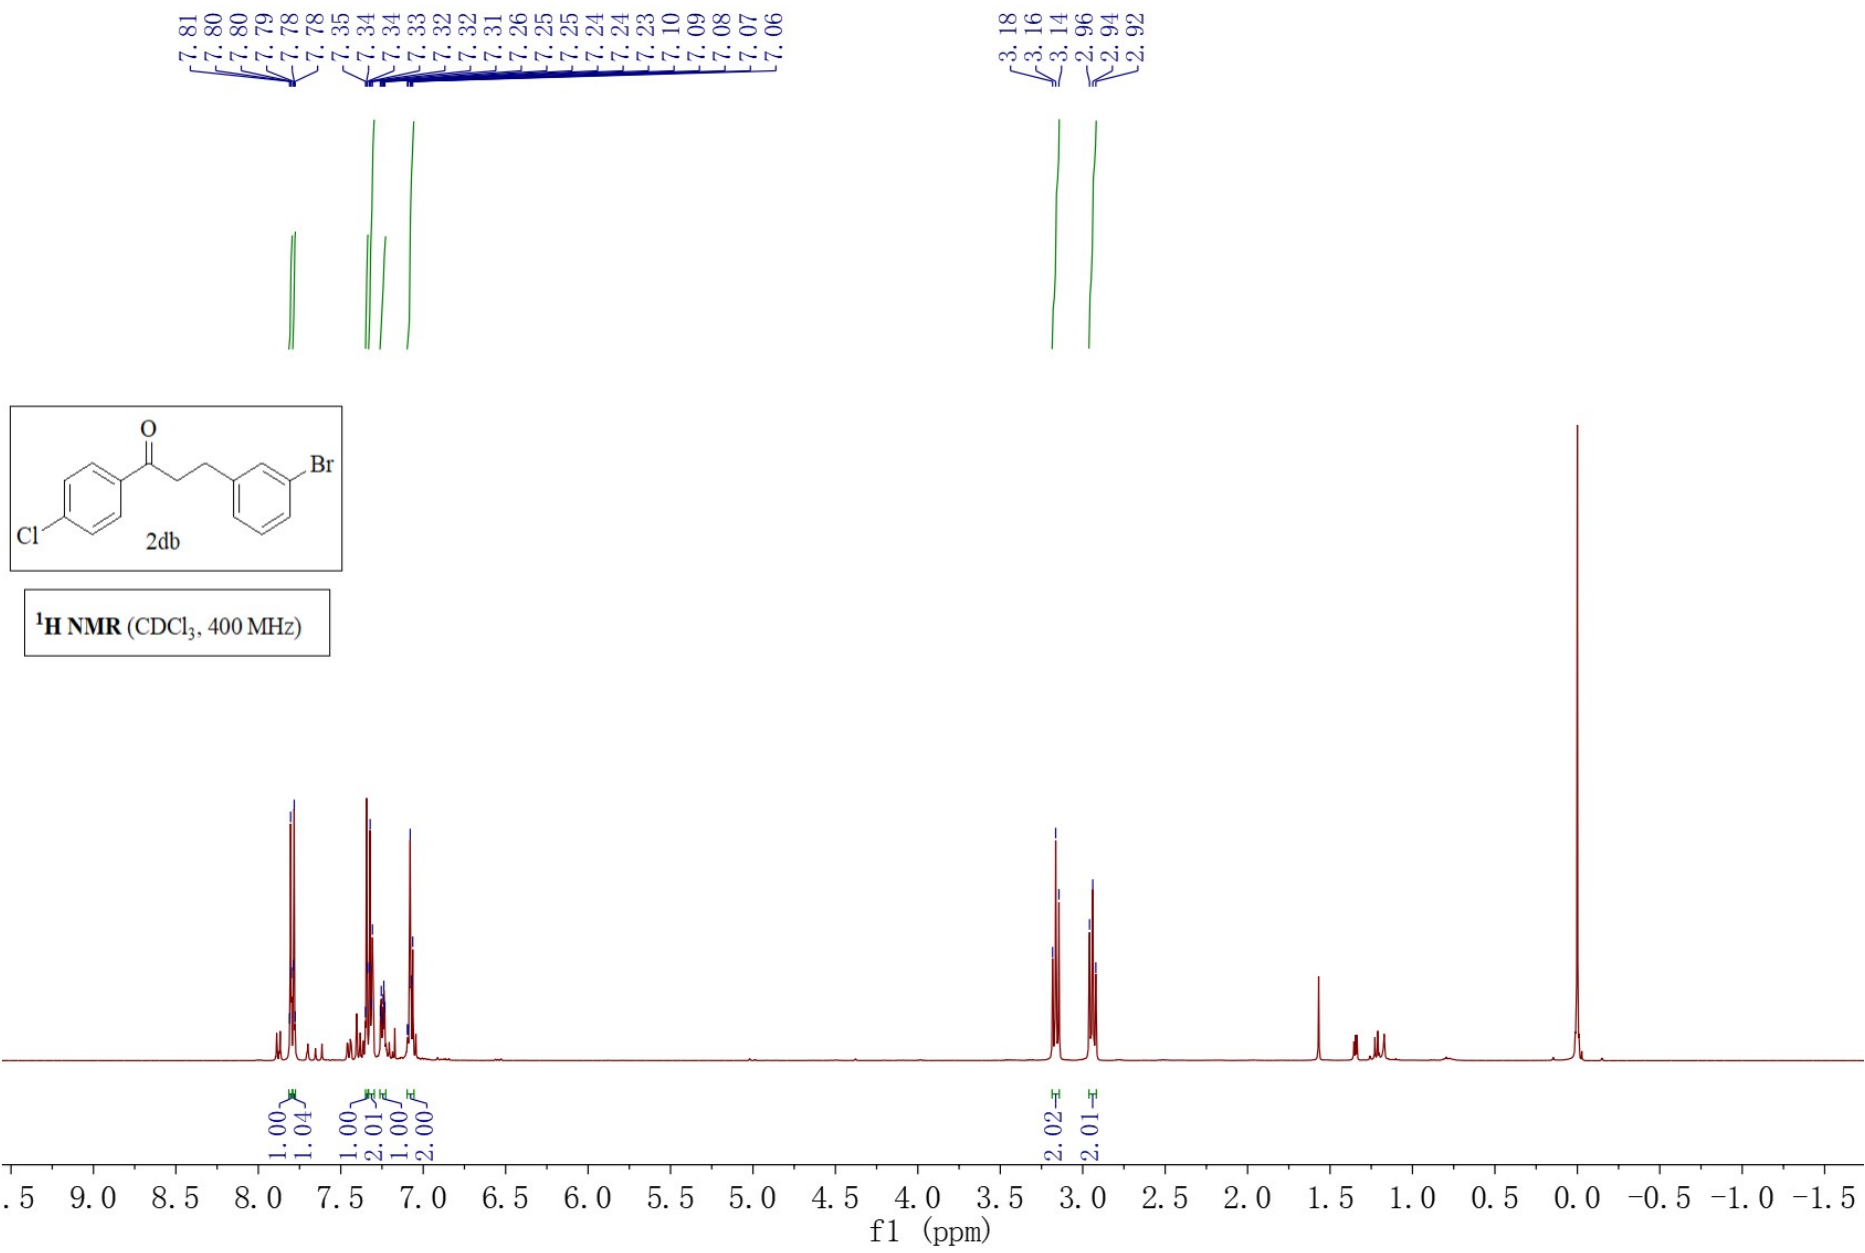

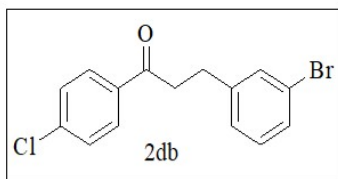

$^{13}\text{C}\{^1\text{H}\}$  NMR ( $\text{CDCl}_3$ , 75 MHz)

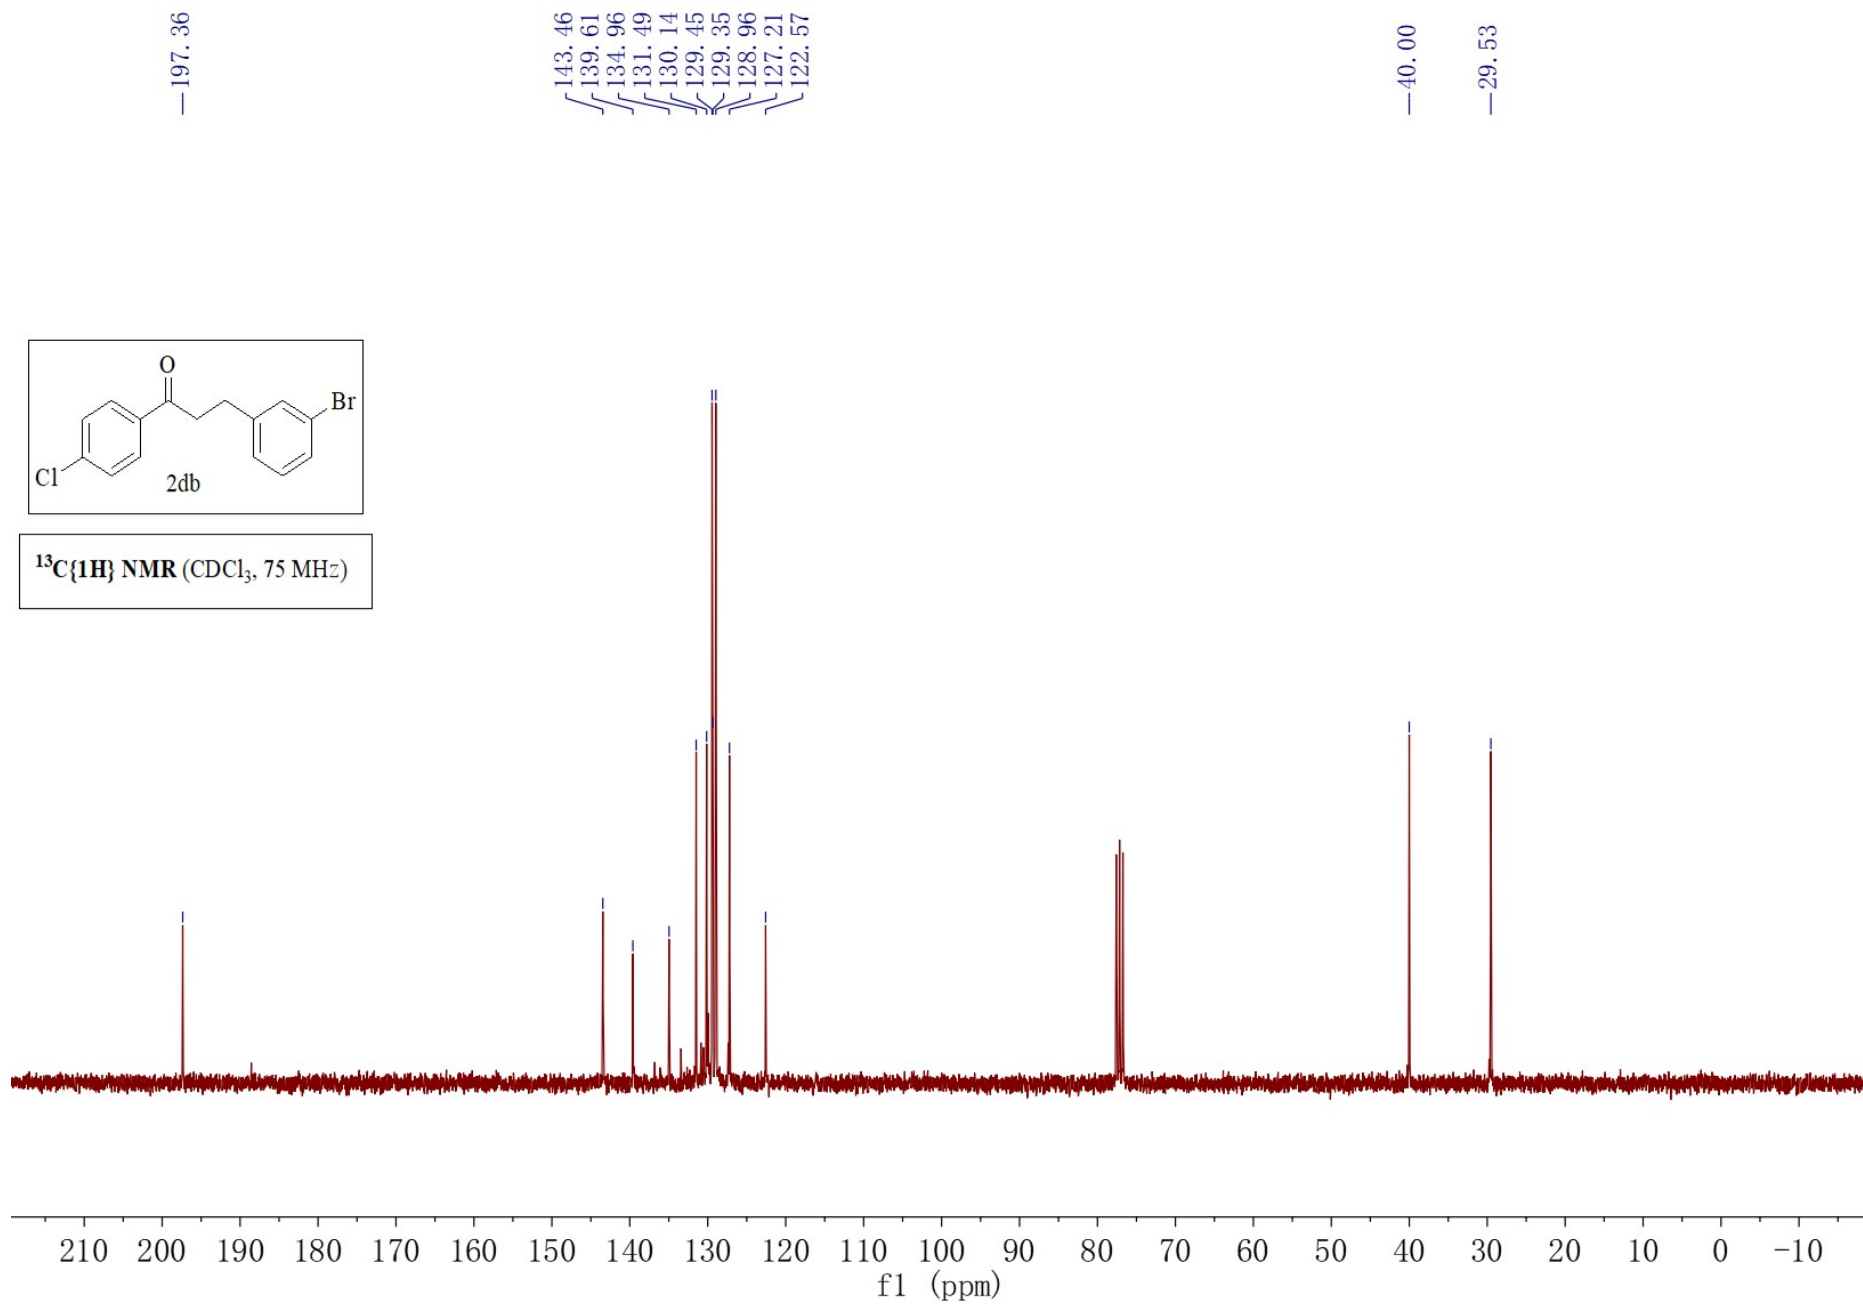



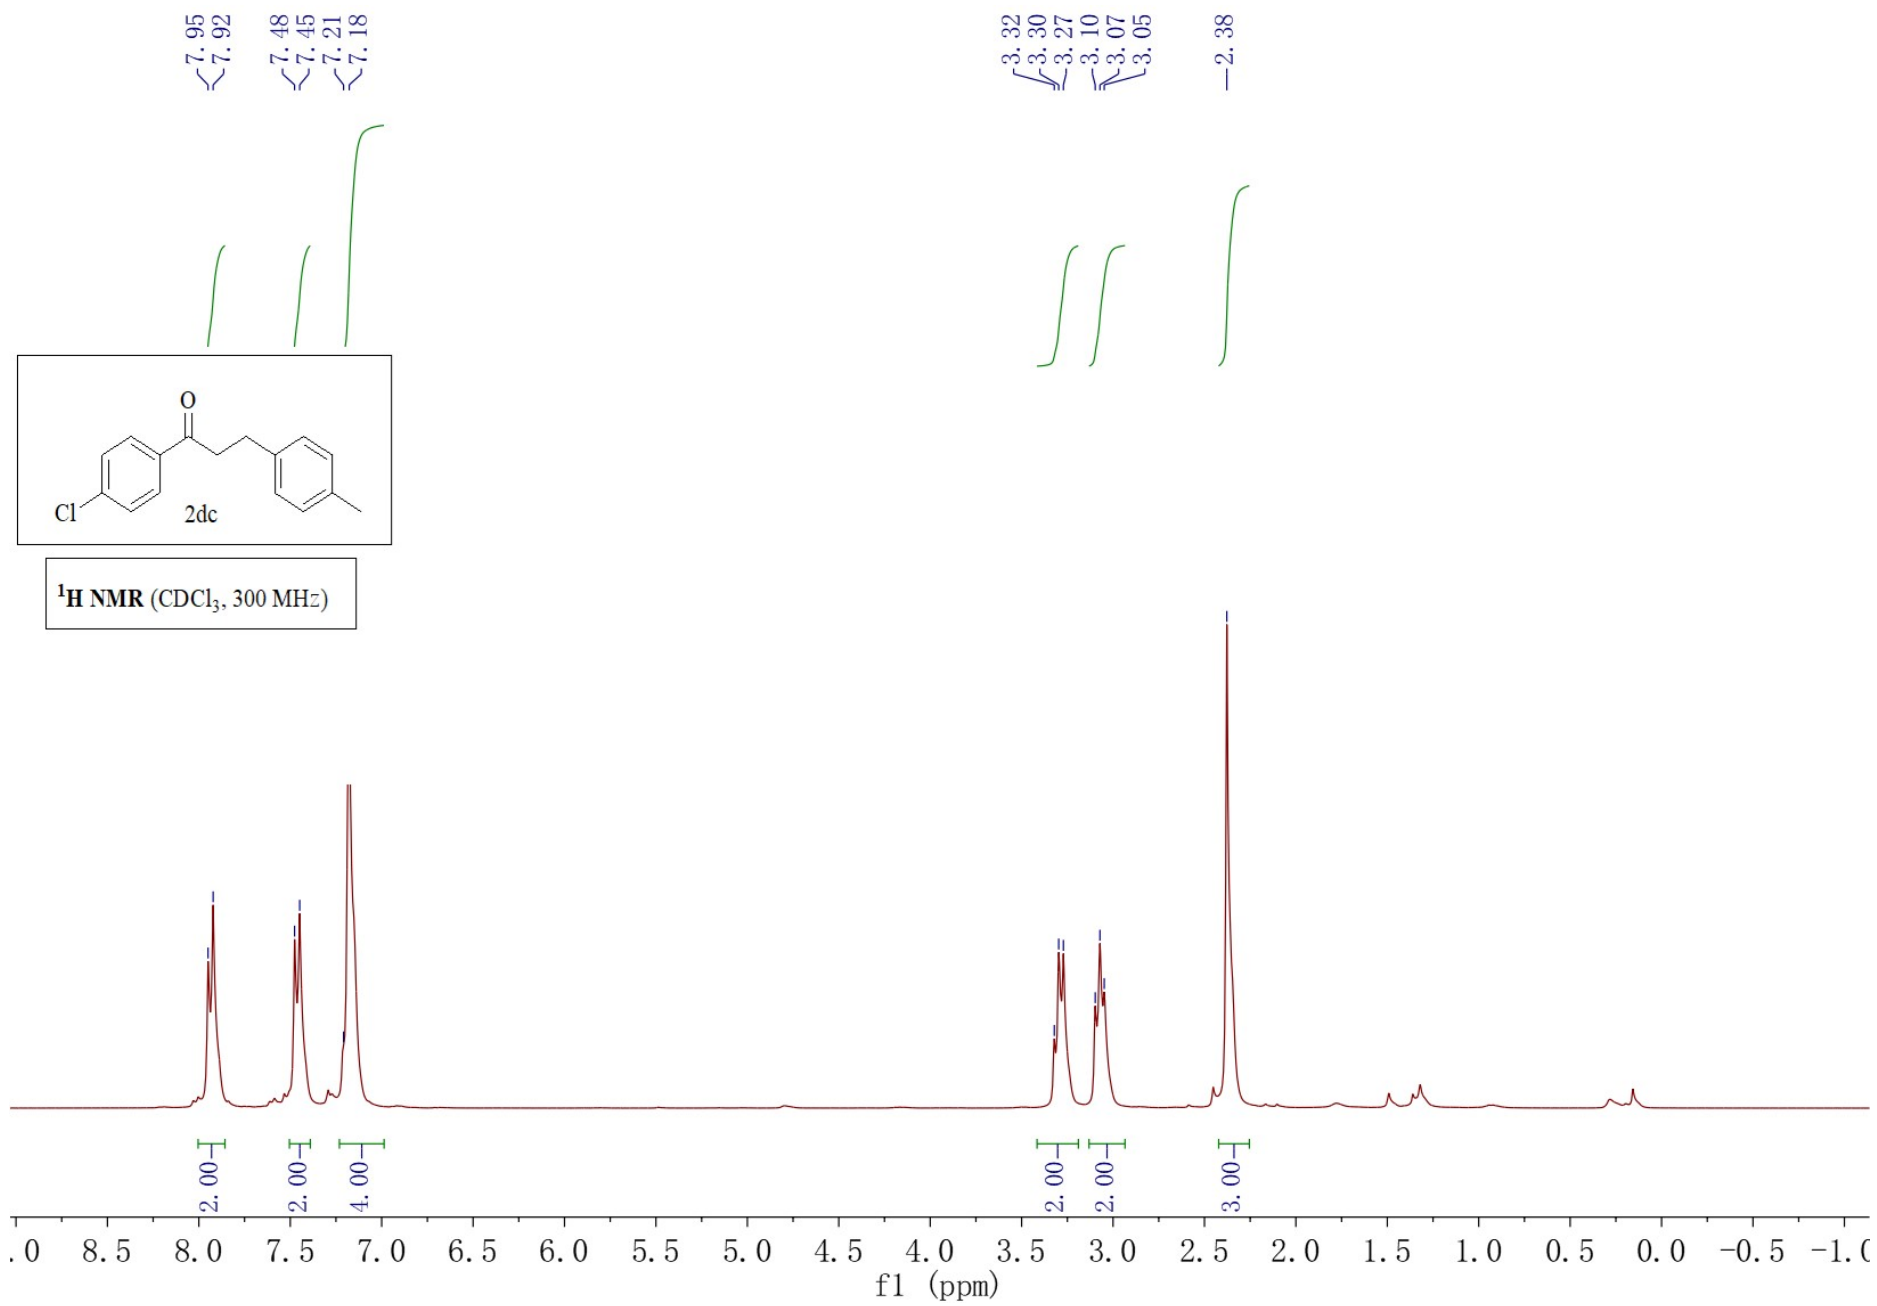

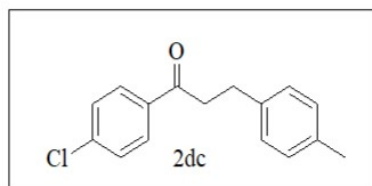

$^{13}\text{C}\{^1\text{H}\}$  NMR ( $\text{CDCl}_3$ , 75 MHz)

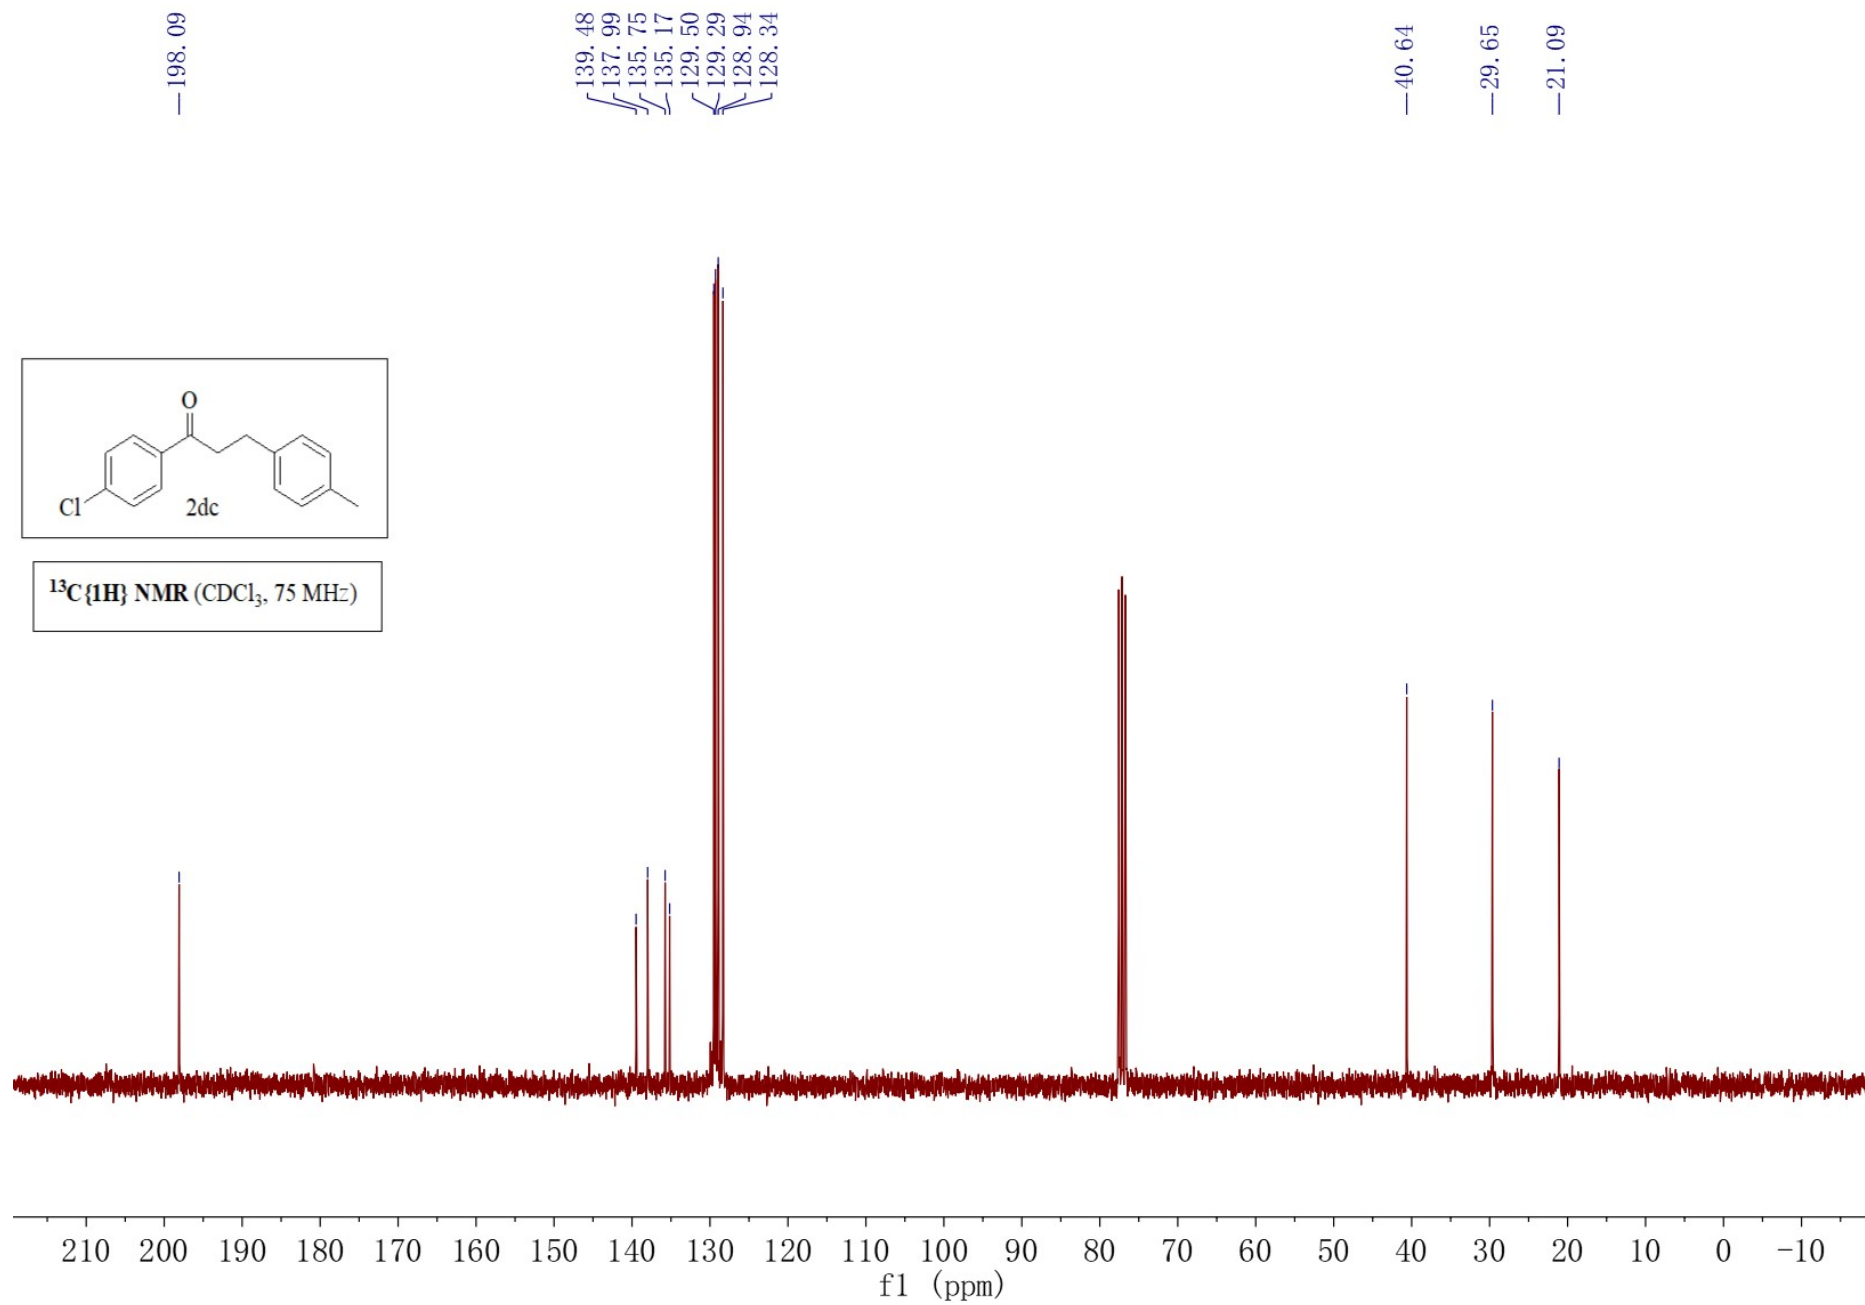

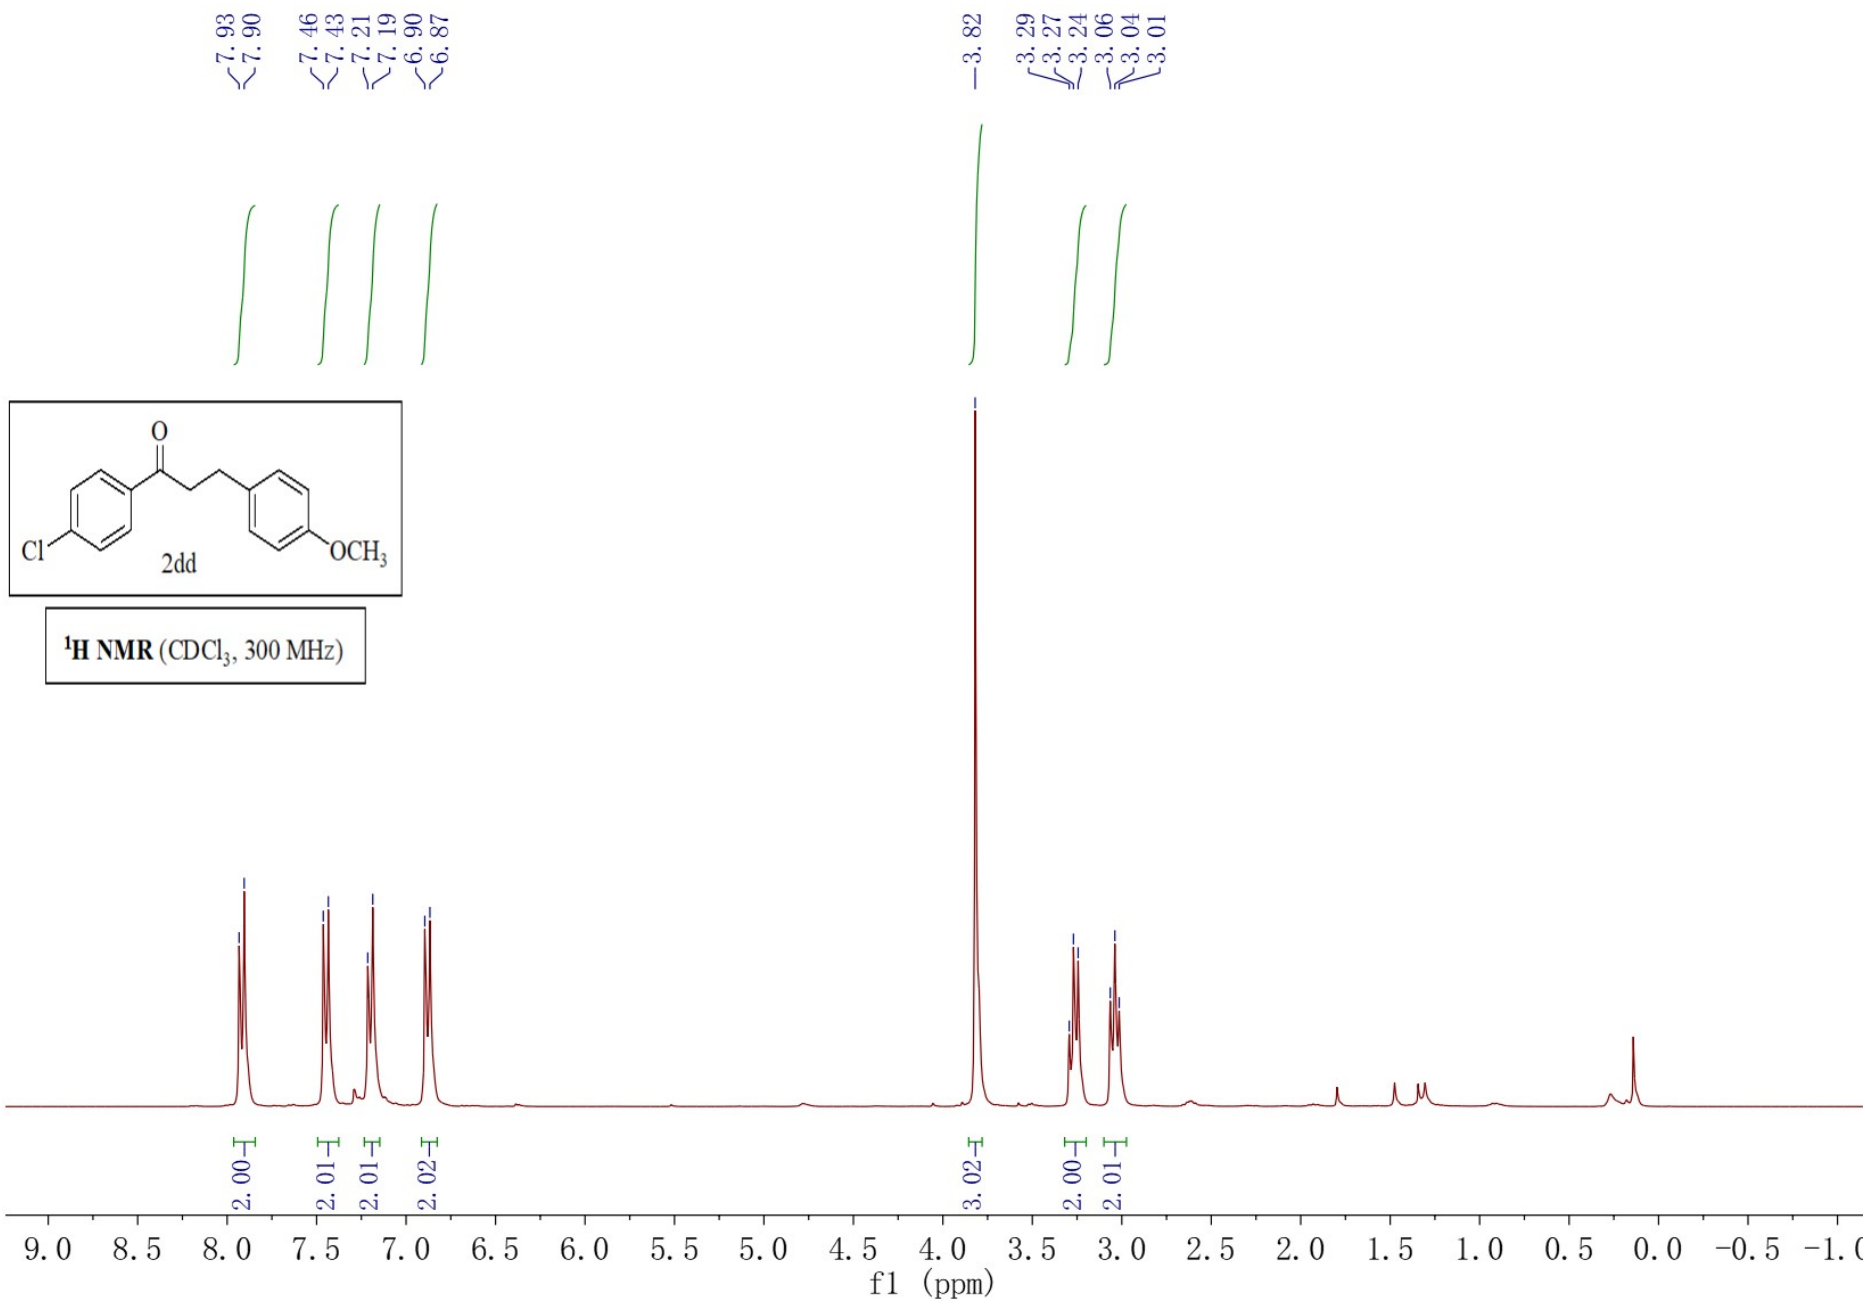

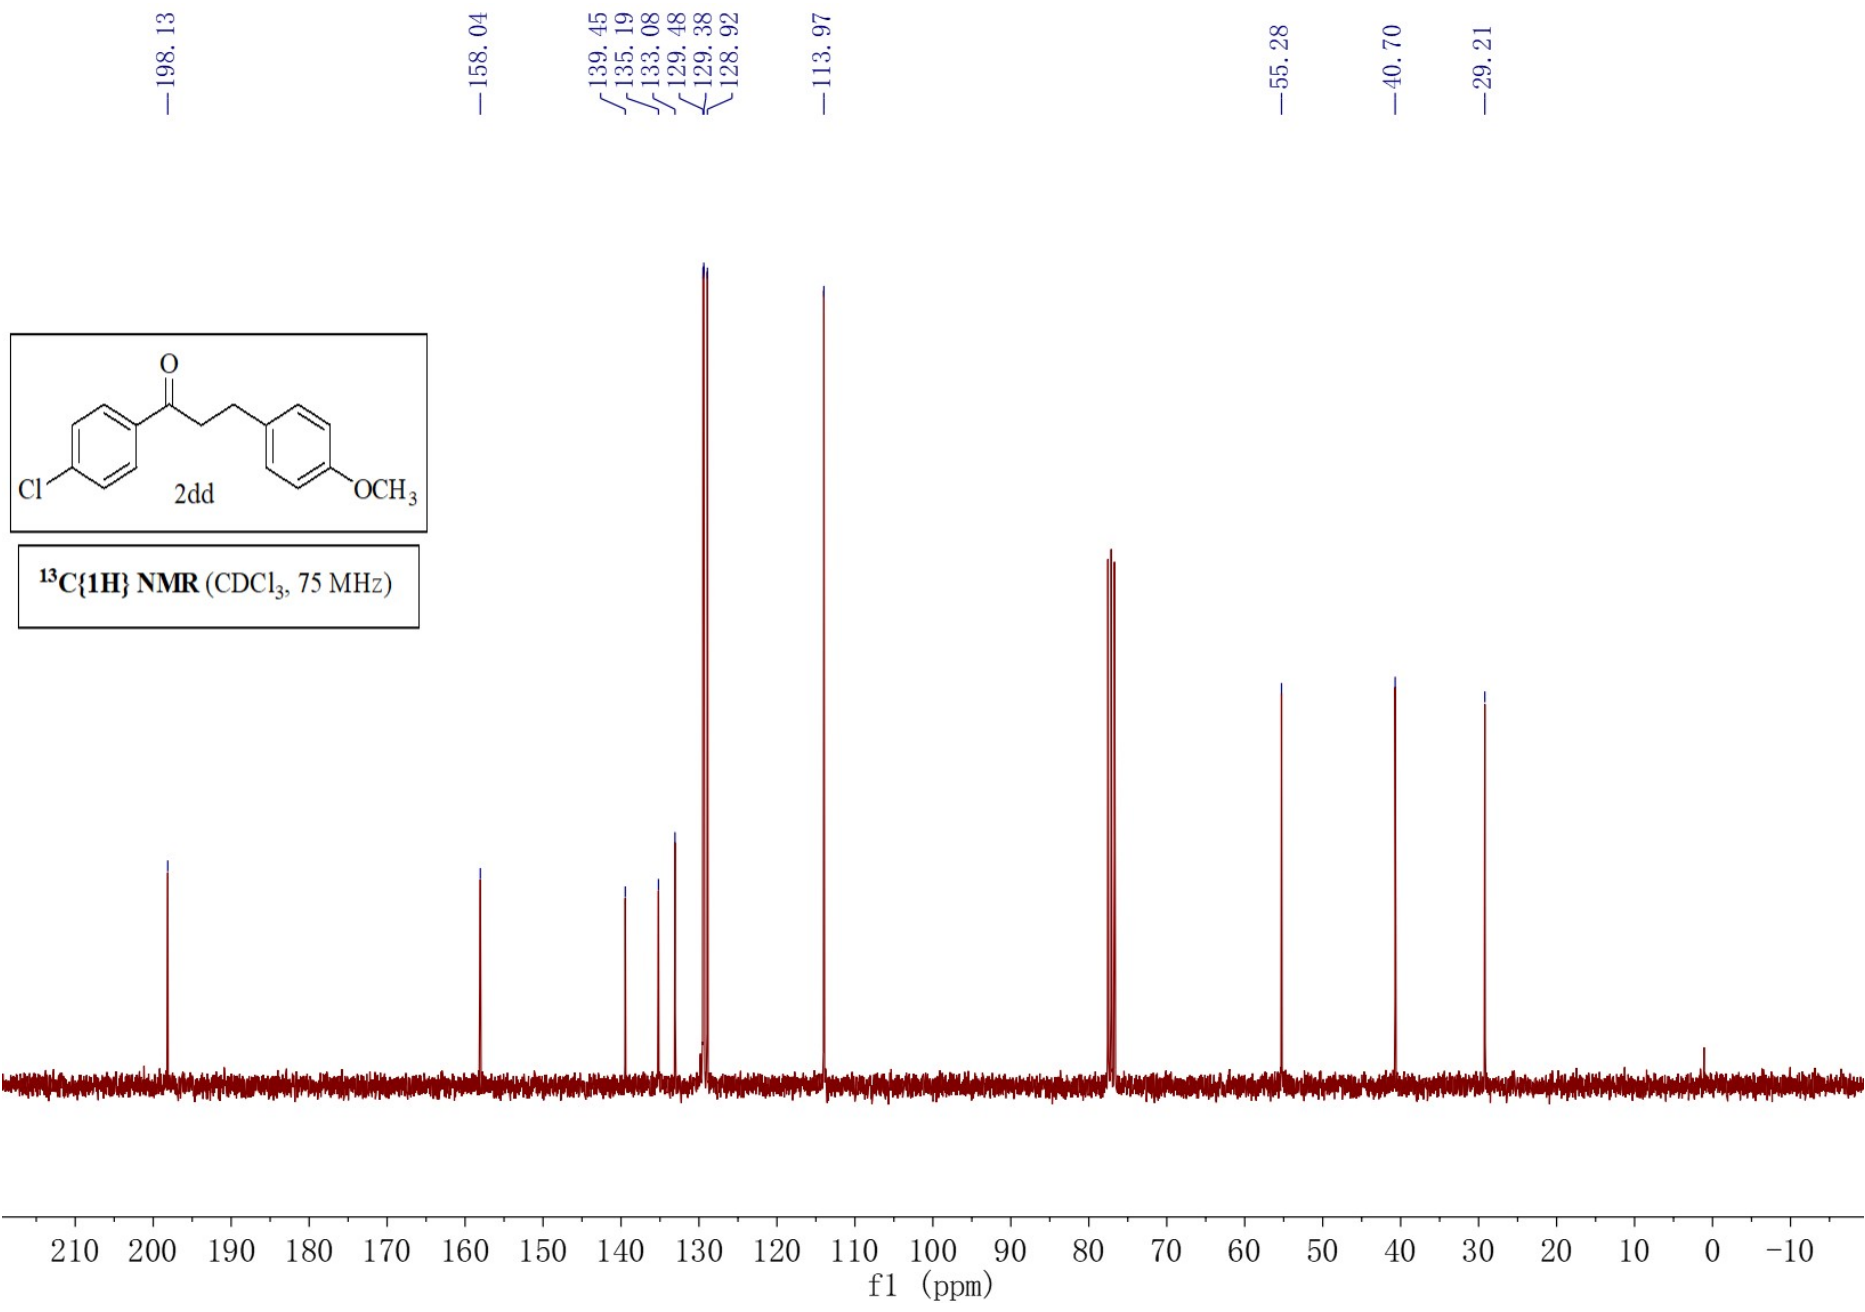

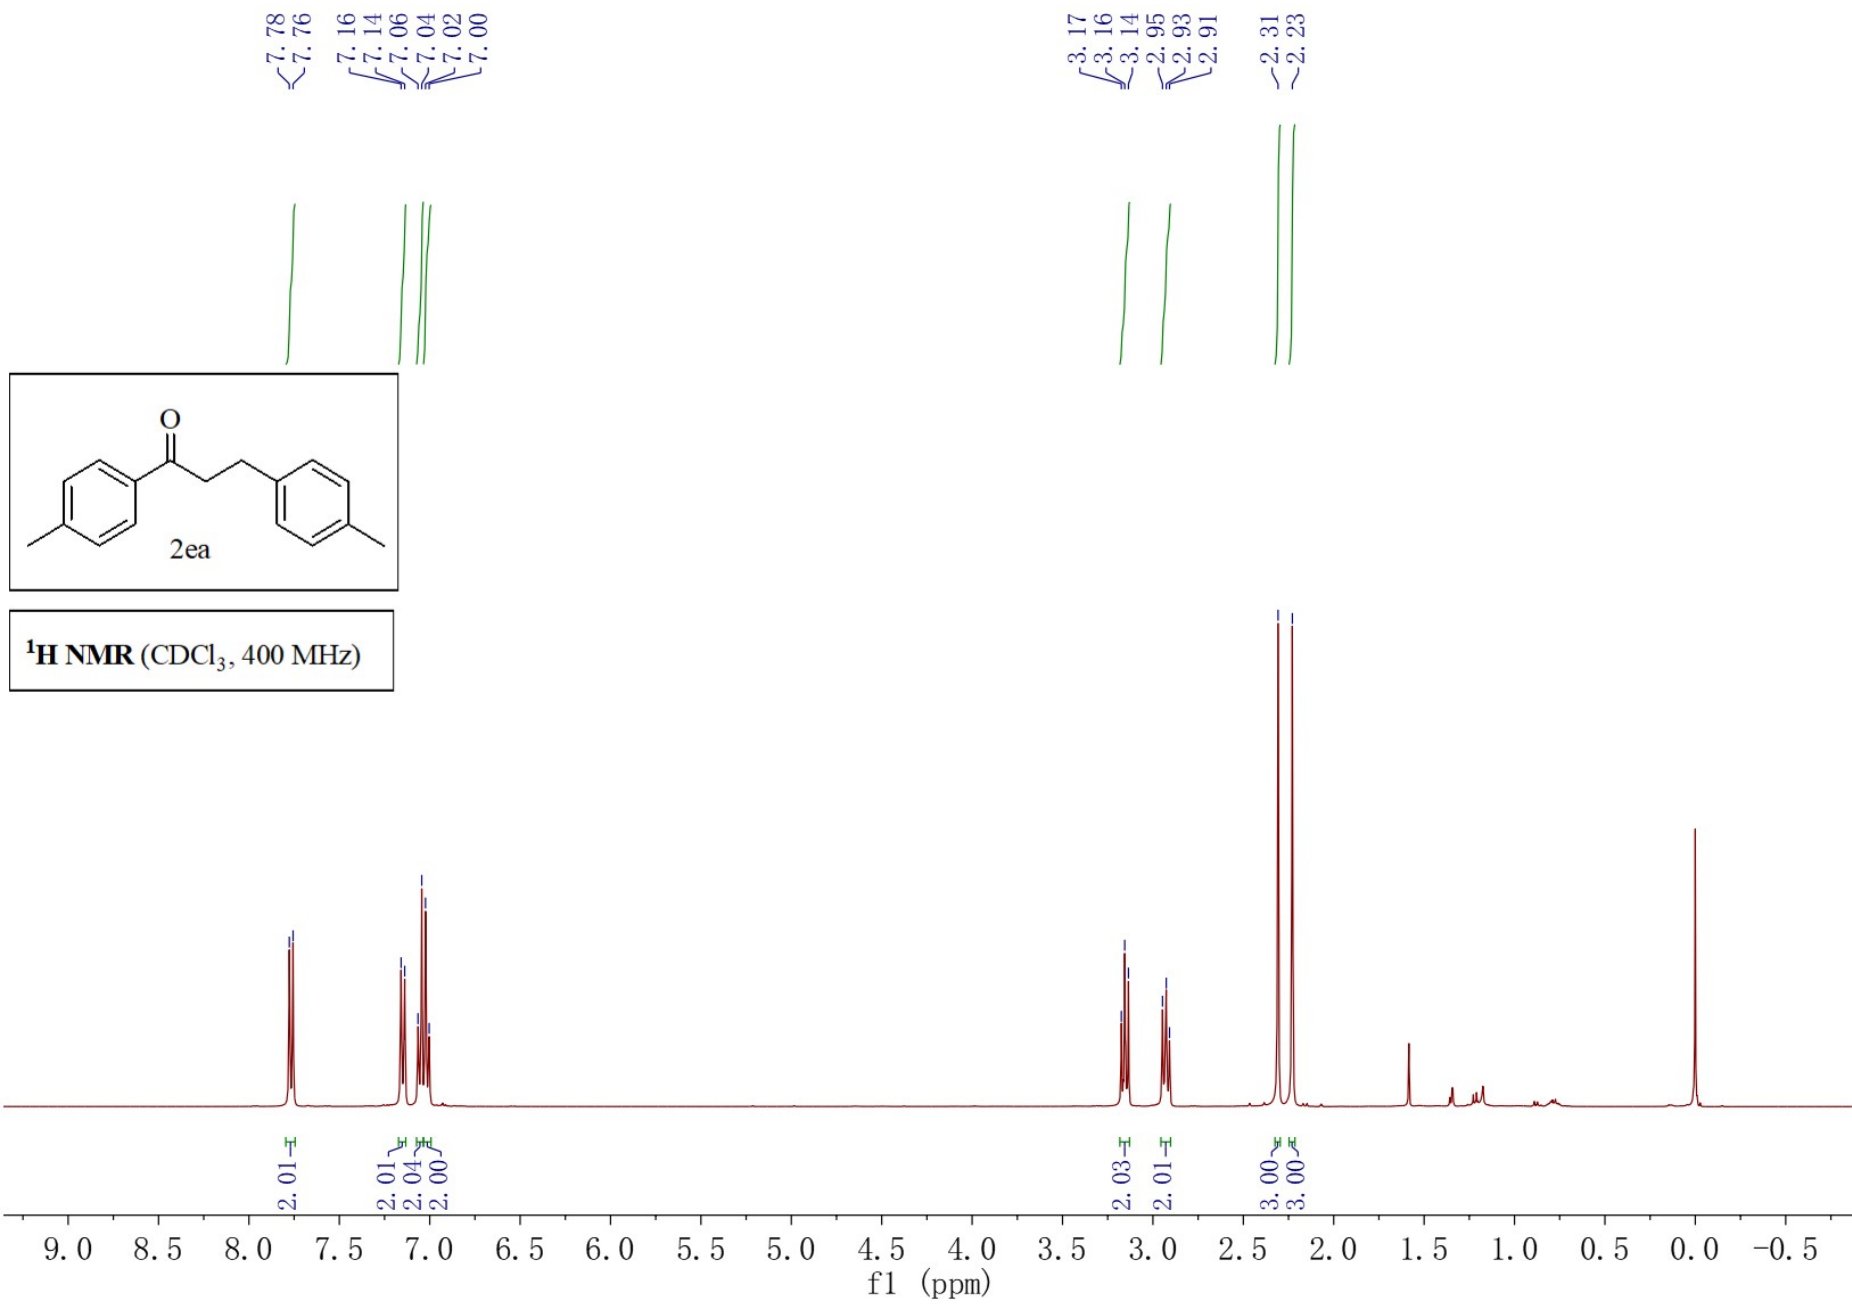

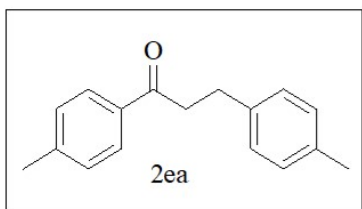

$^{13}\text{C}\{^1\text{H}\}$  NMR ( $\text{CDCl}_3$ , 75 MHz)

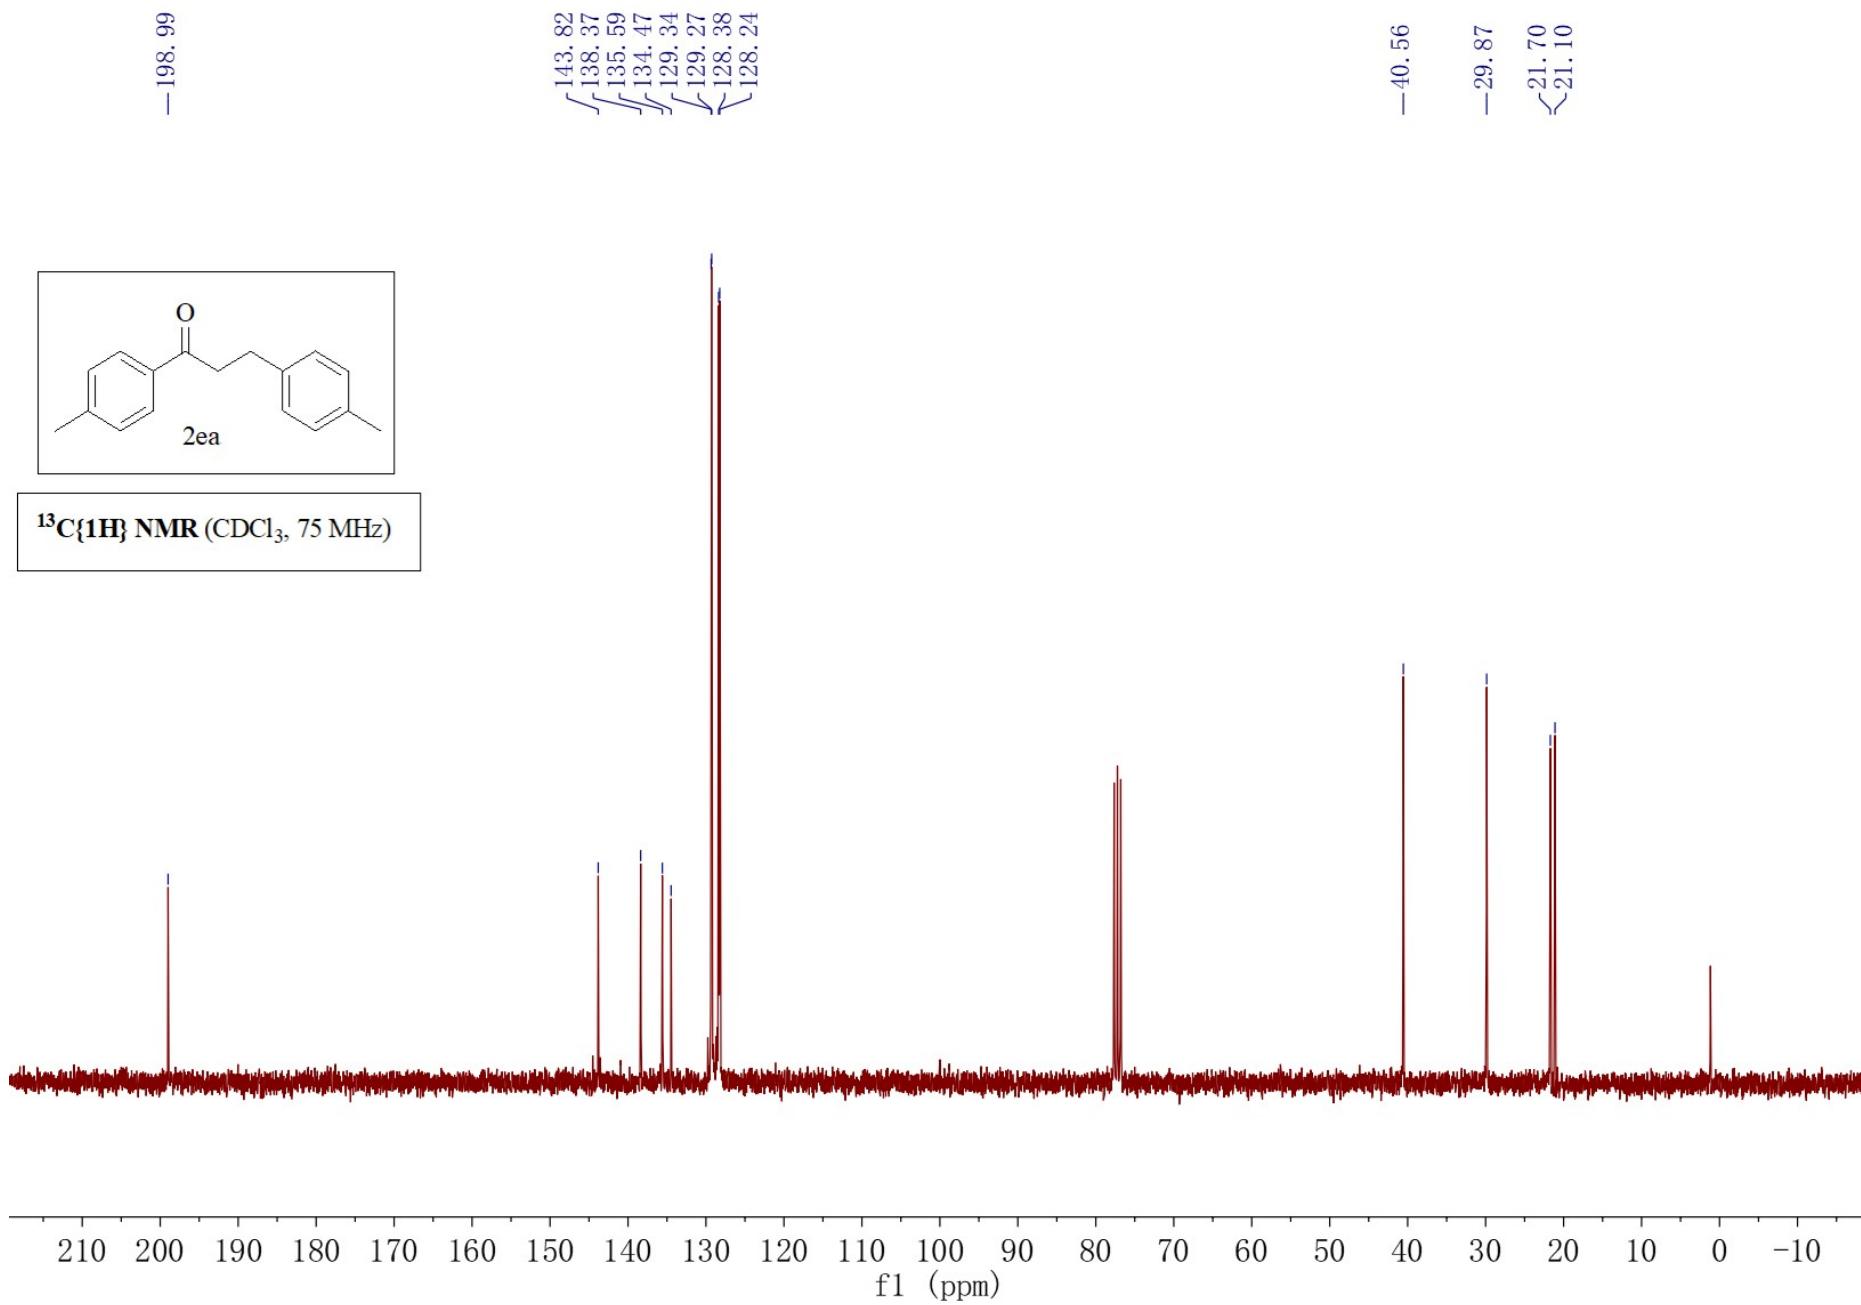

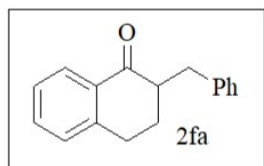

<sup>1</sup>H NMR (CDCl<sub>3</sub>, 300 MHz)

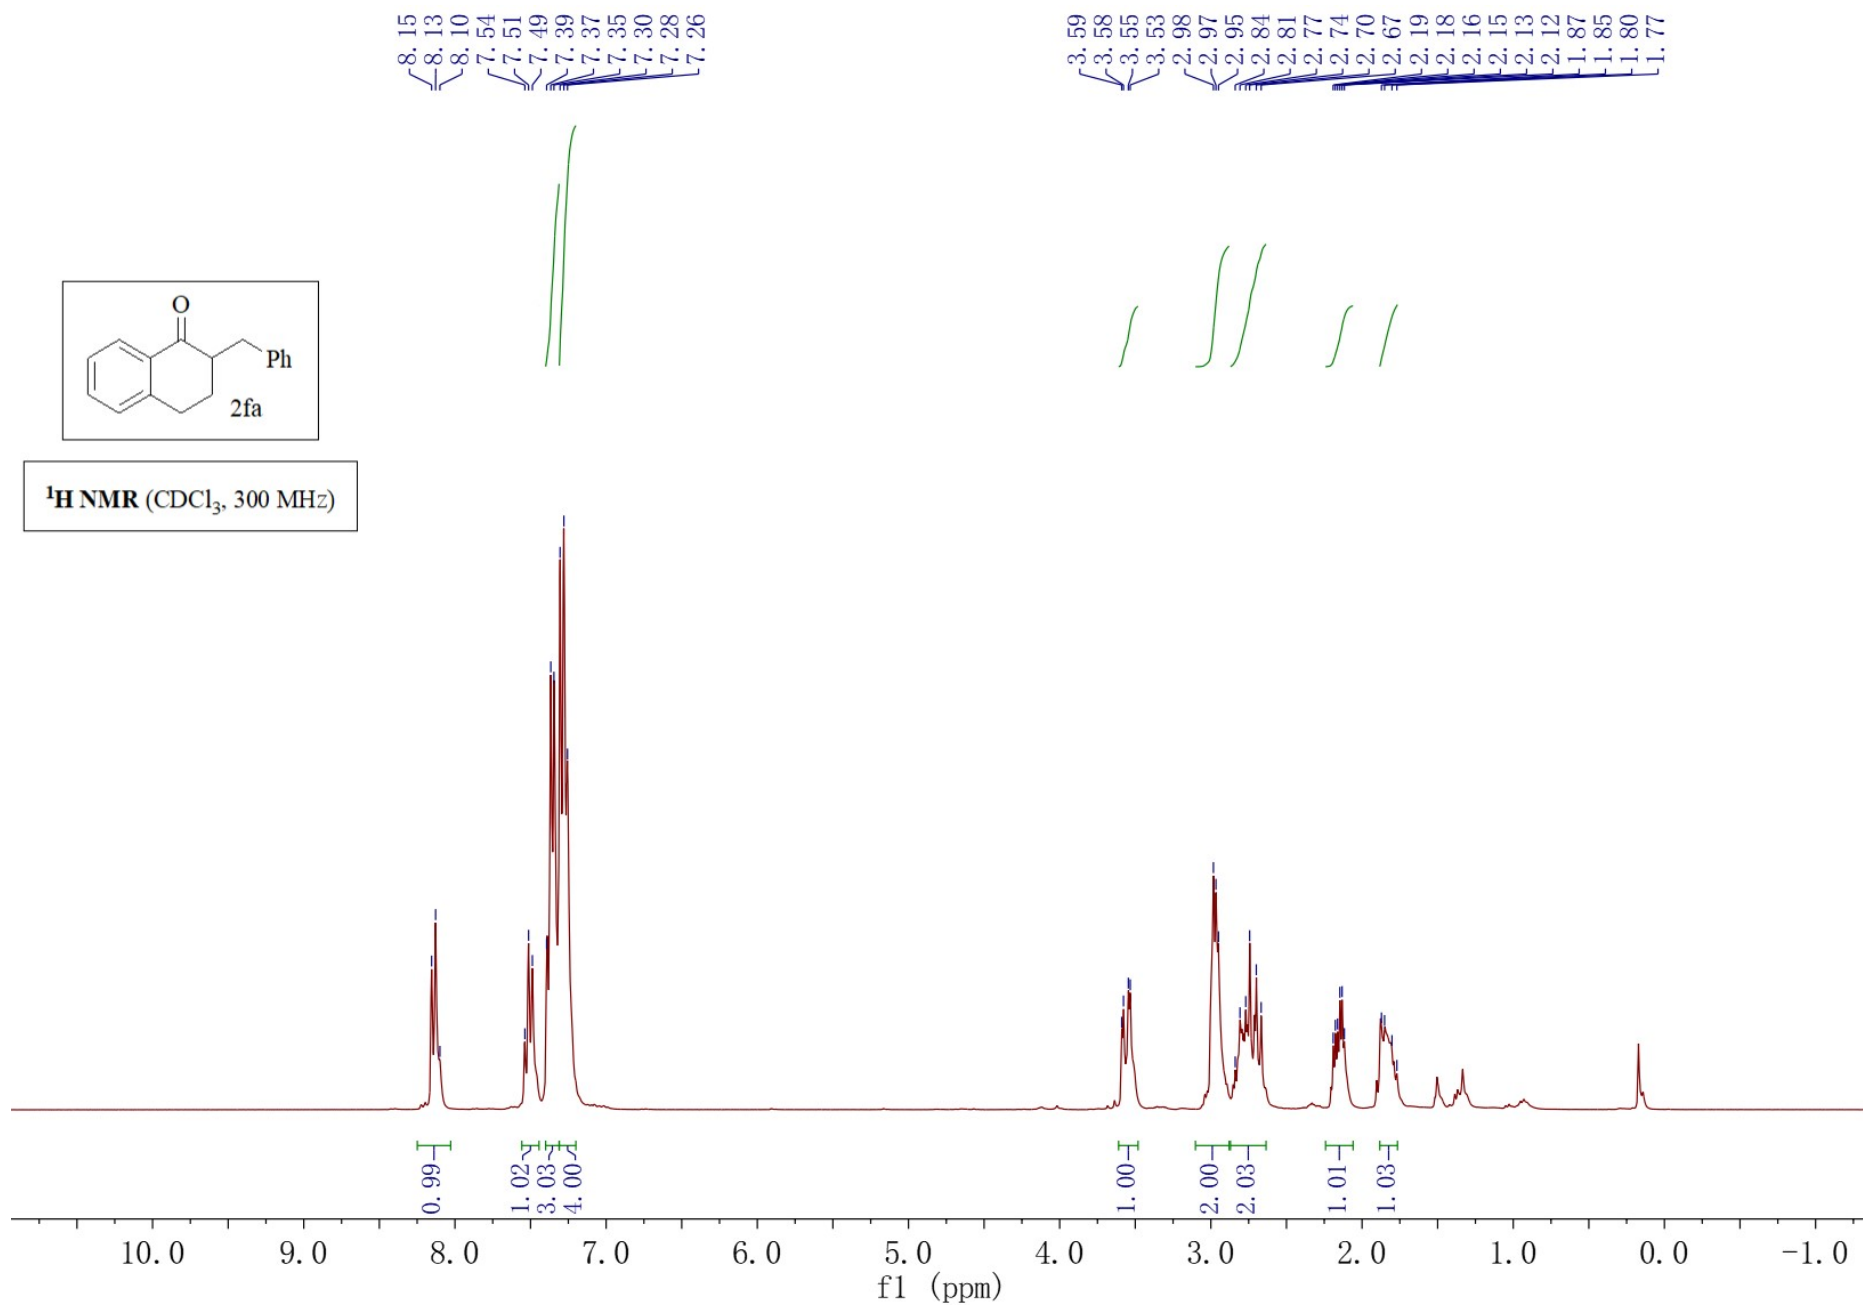

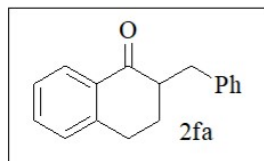

$^{13}\text{C}\{^1\text{H}\}$  NMR ( $\text{CDCl}_3$ , 75 MHz)

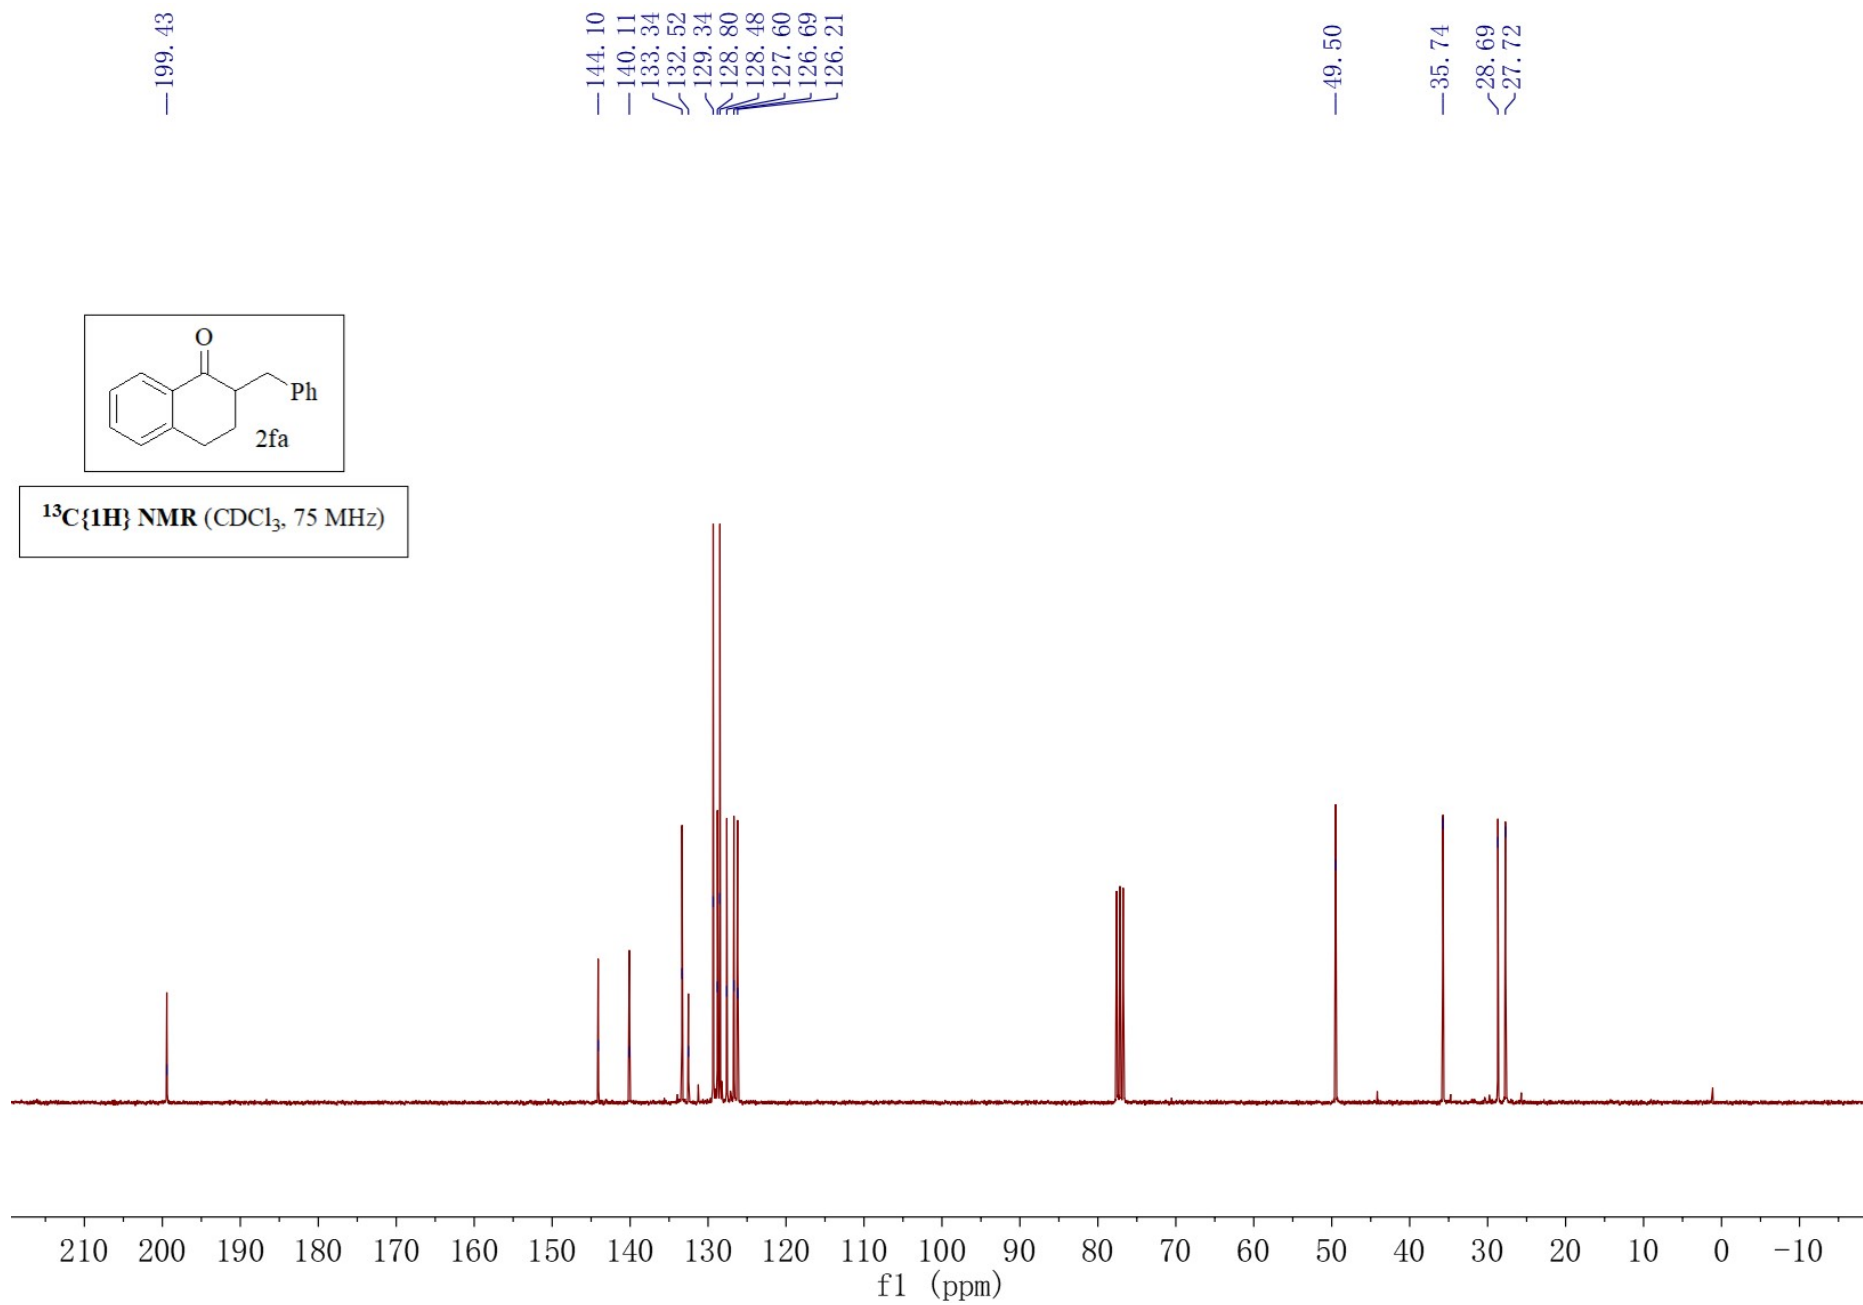



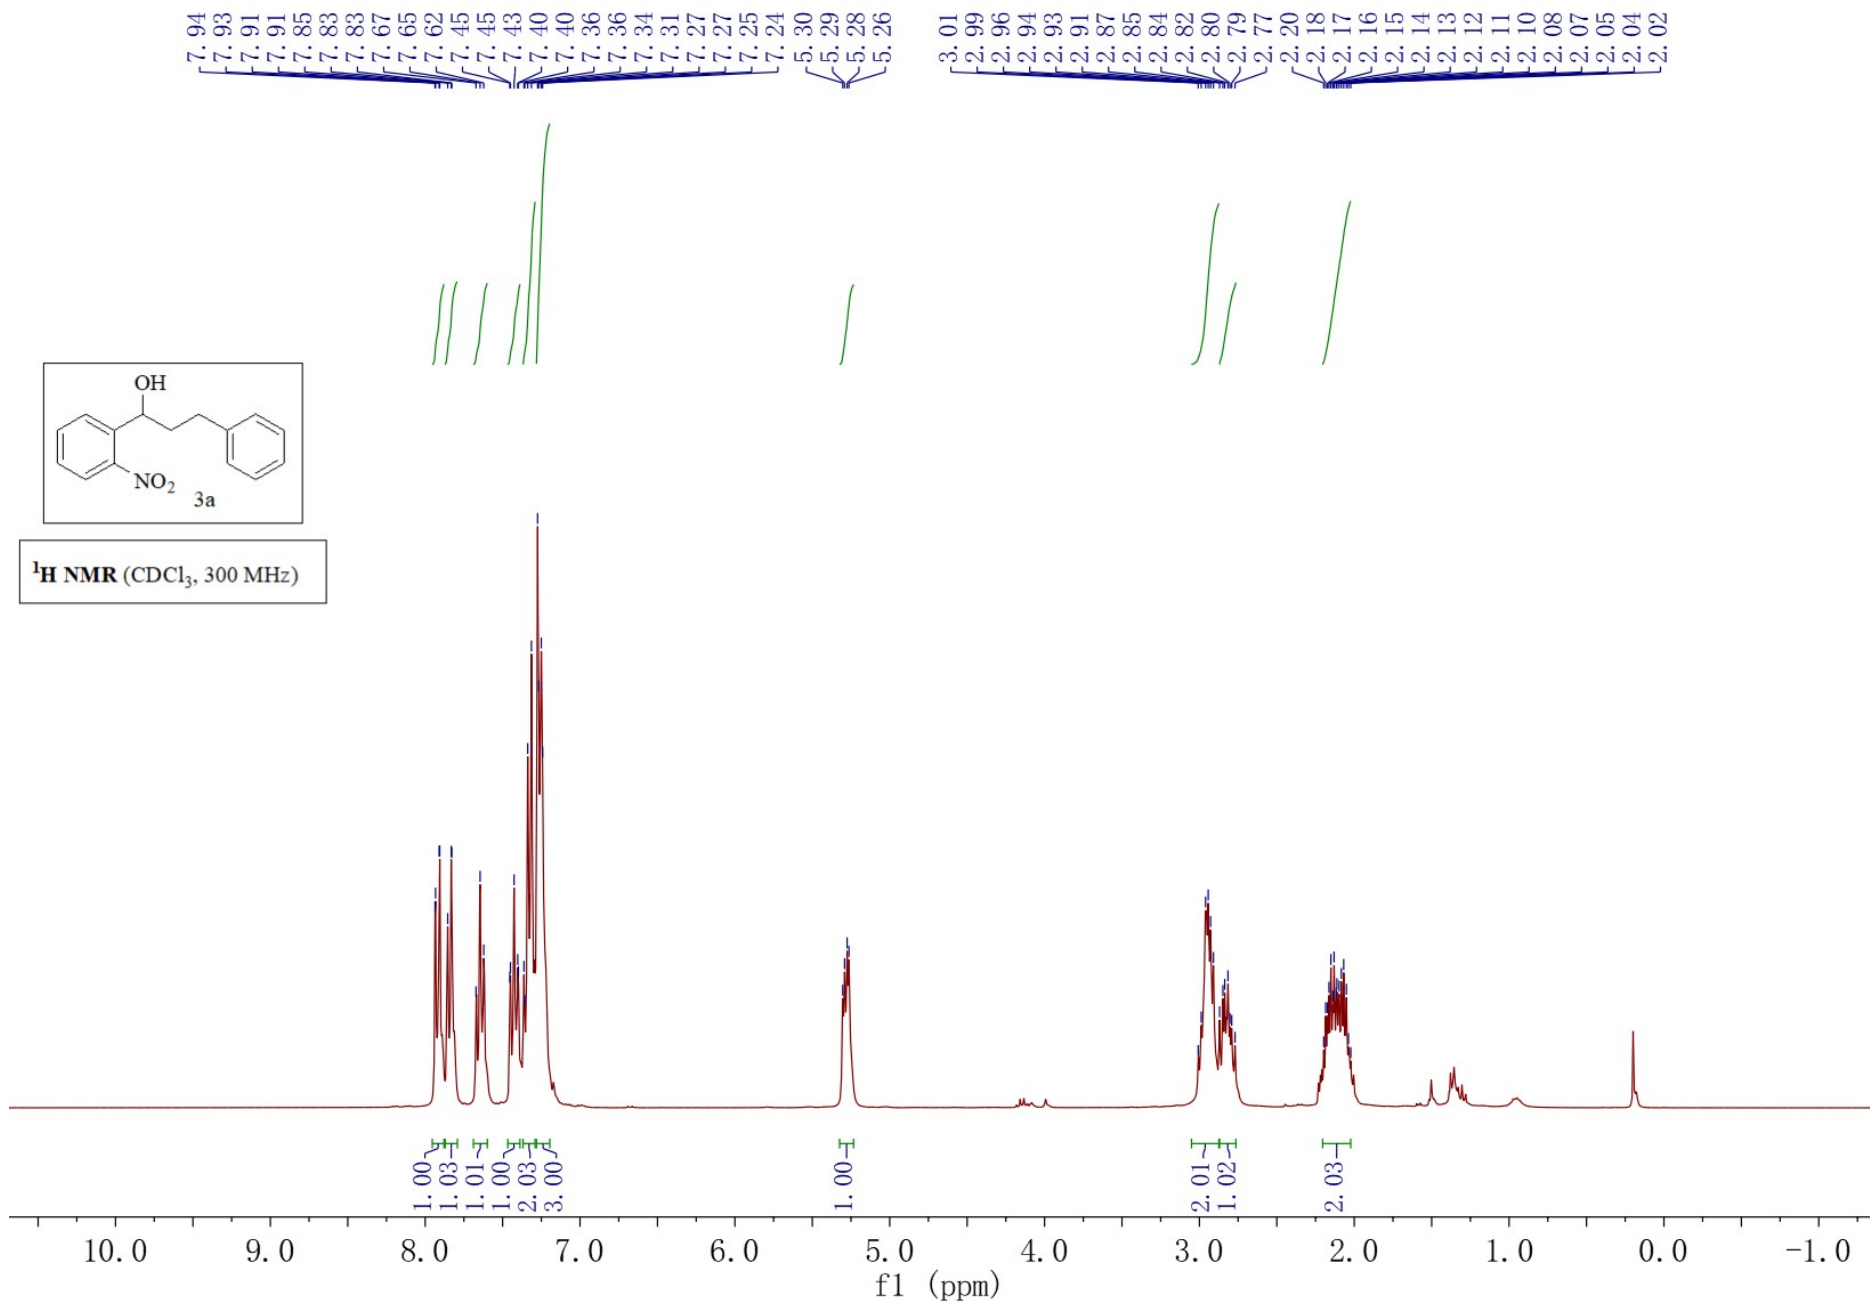

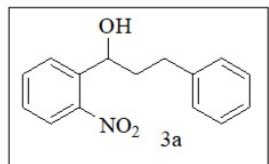

$^{13}\text{C}\{^1\text{H}\}$  NMR ( $\text{CDCl}_3$ , 75 MHz)

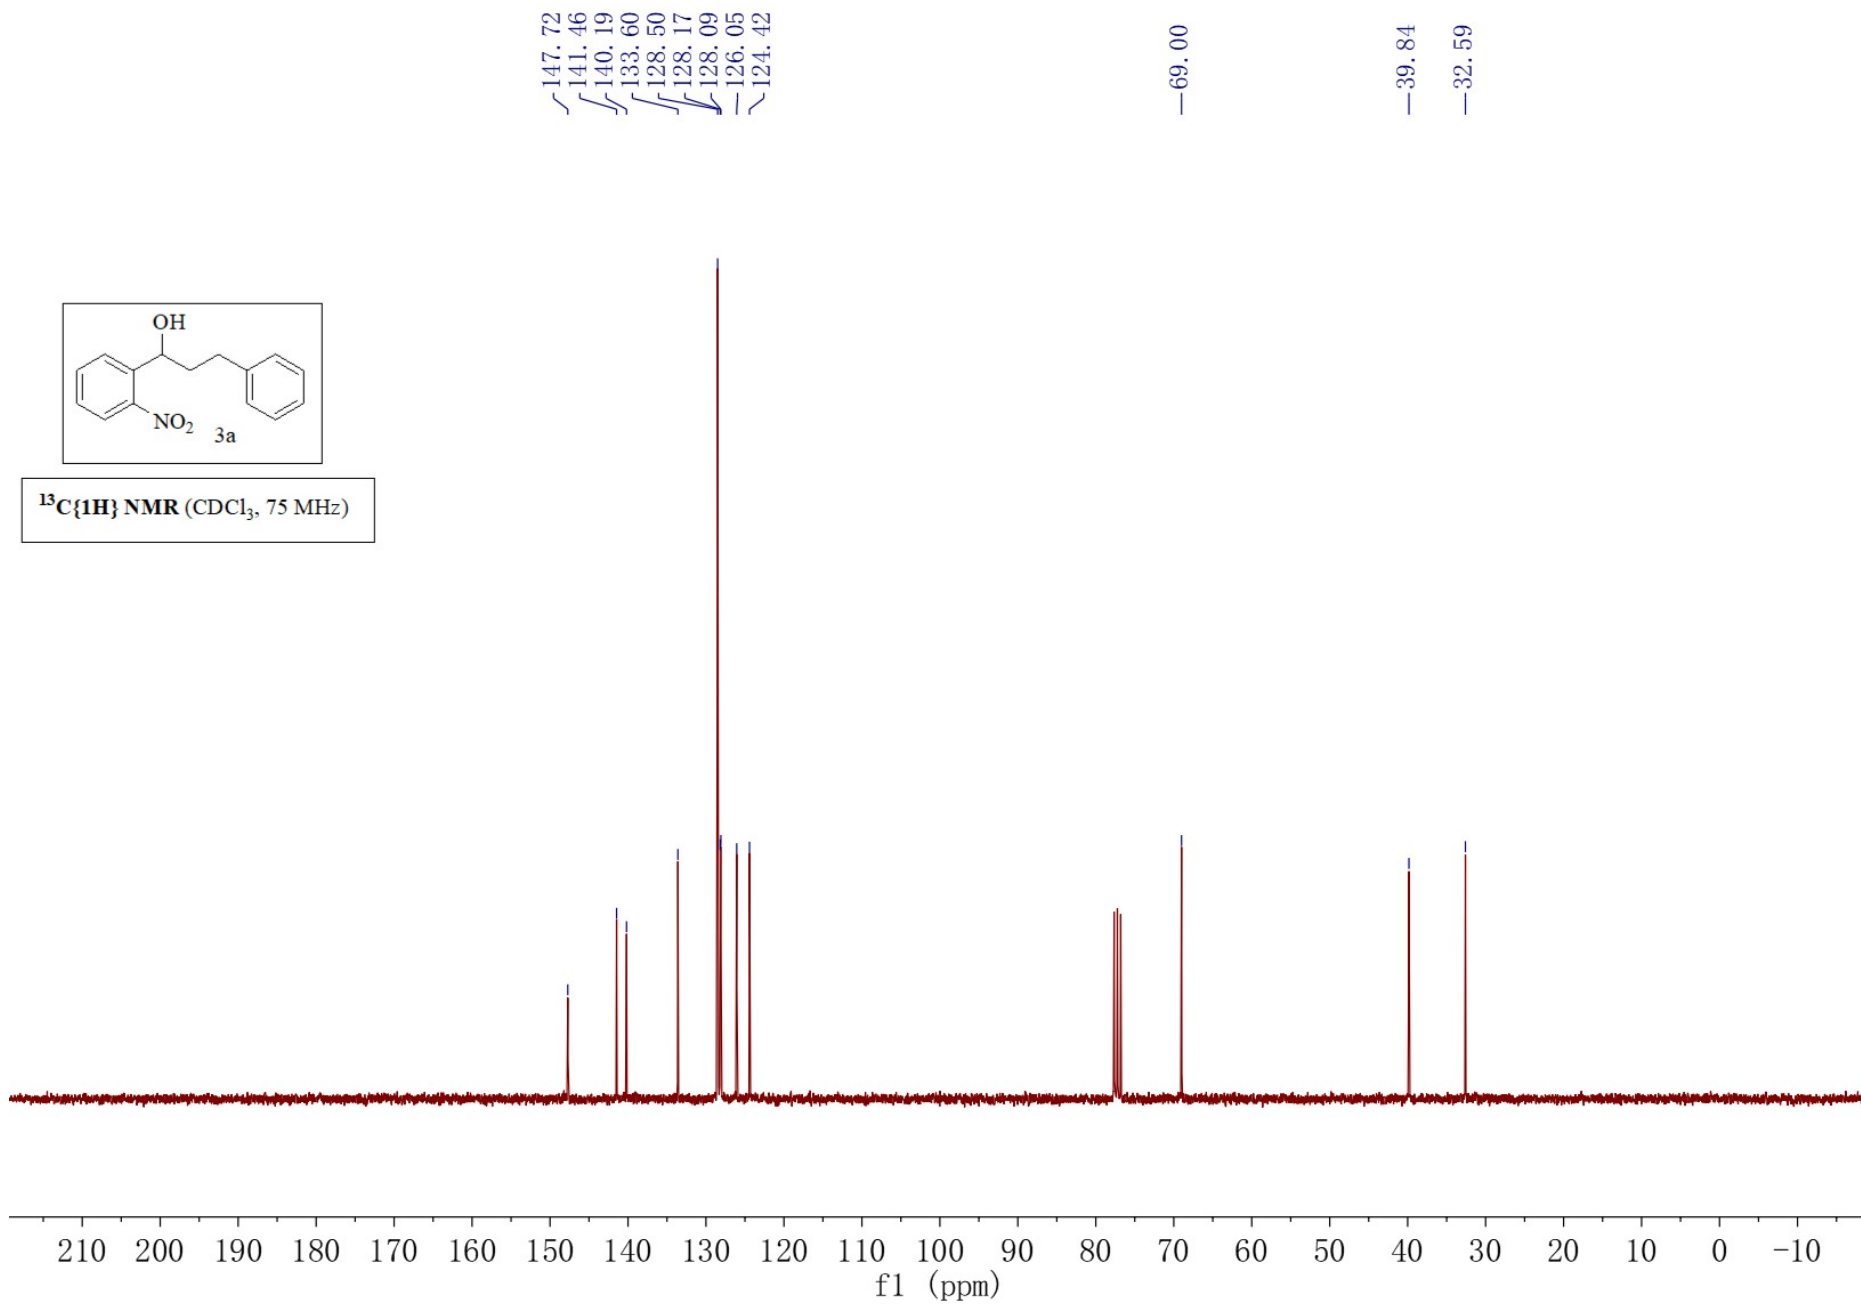

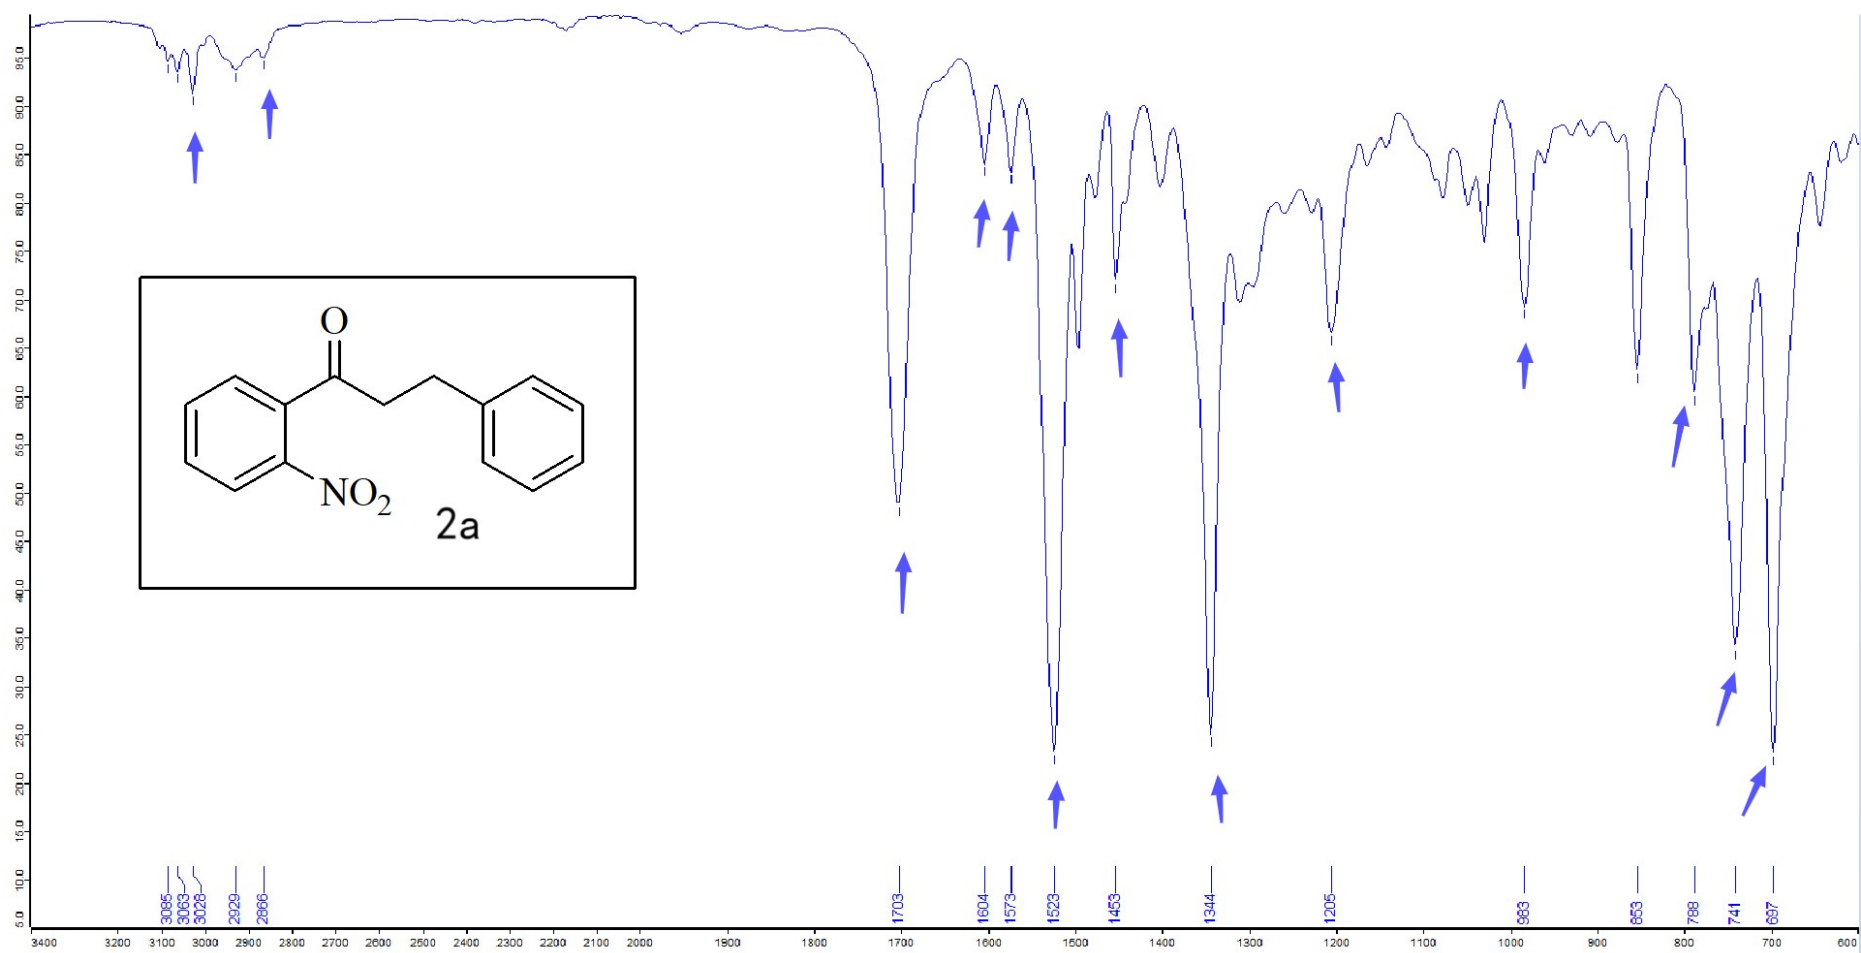

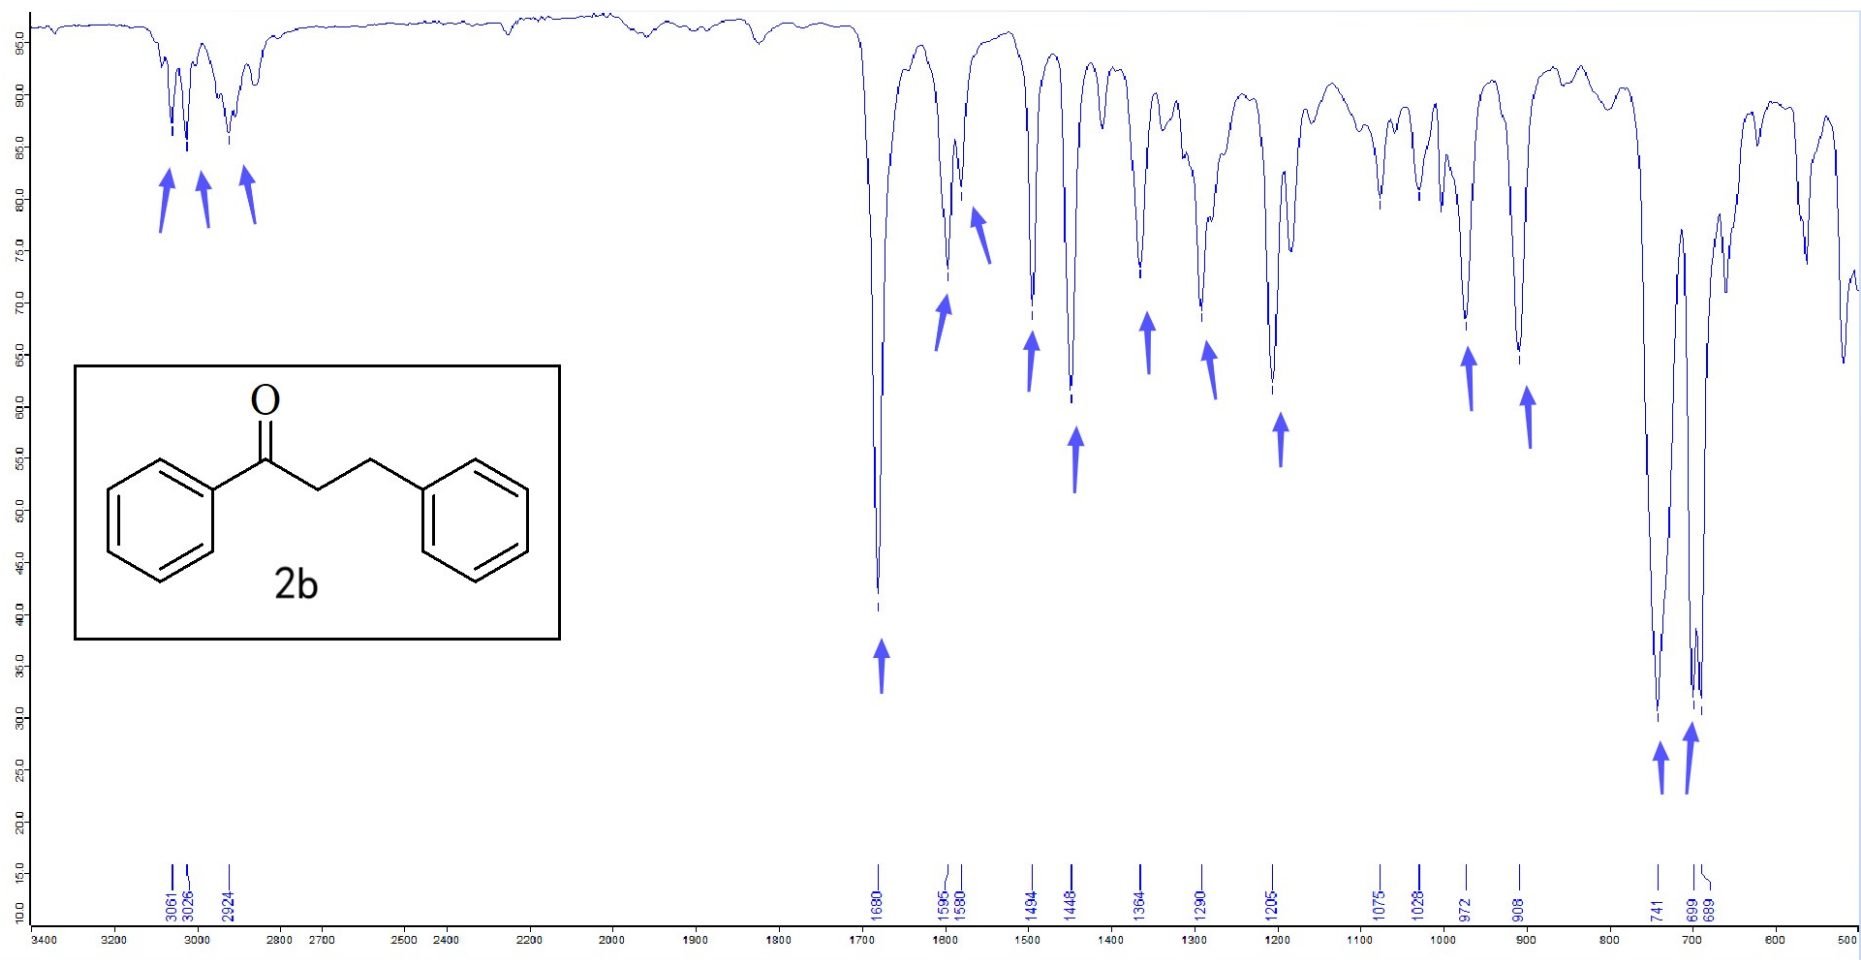

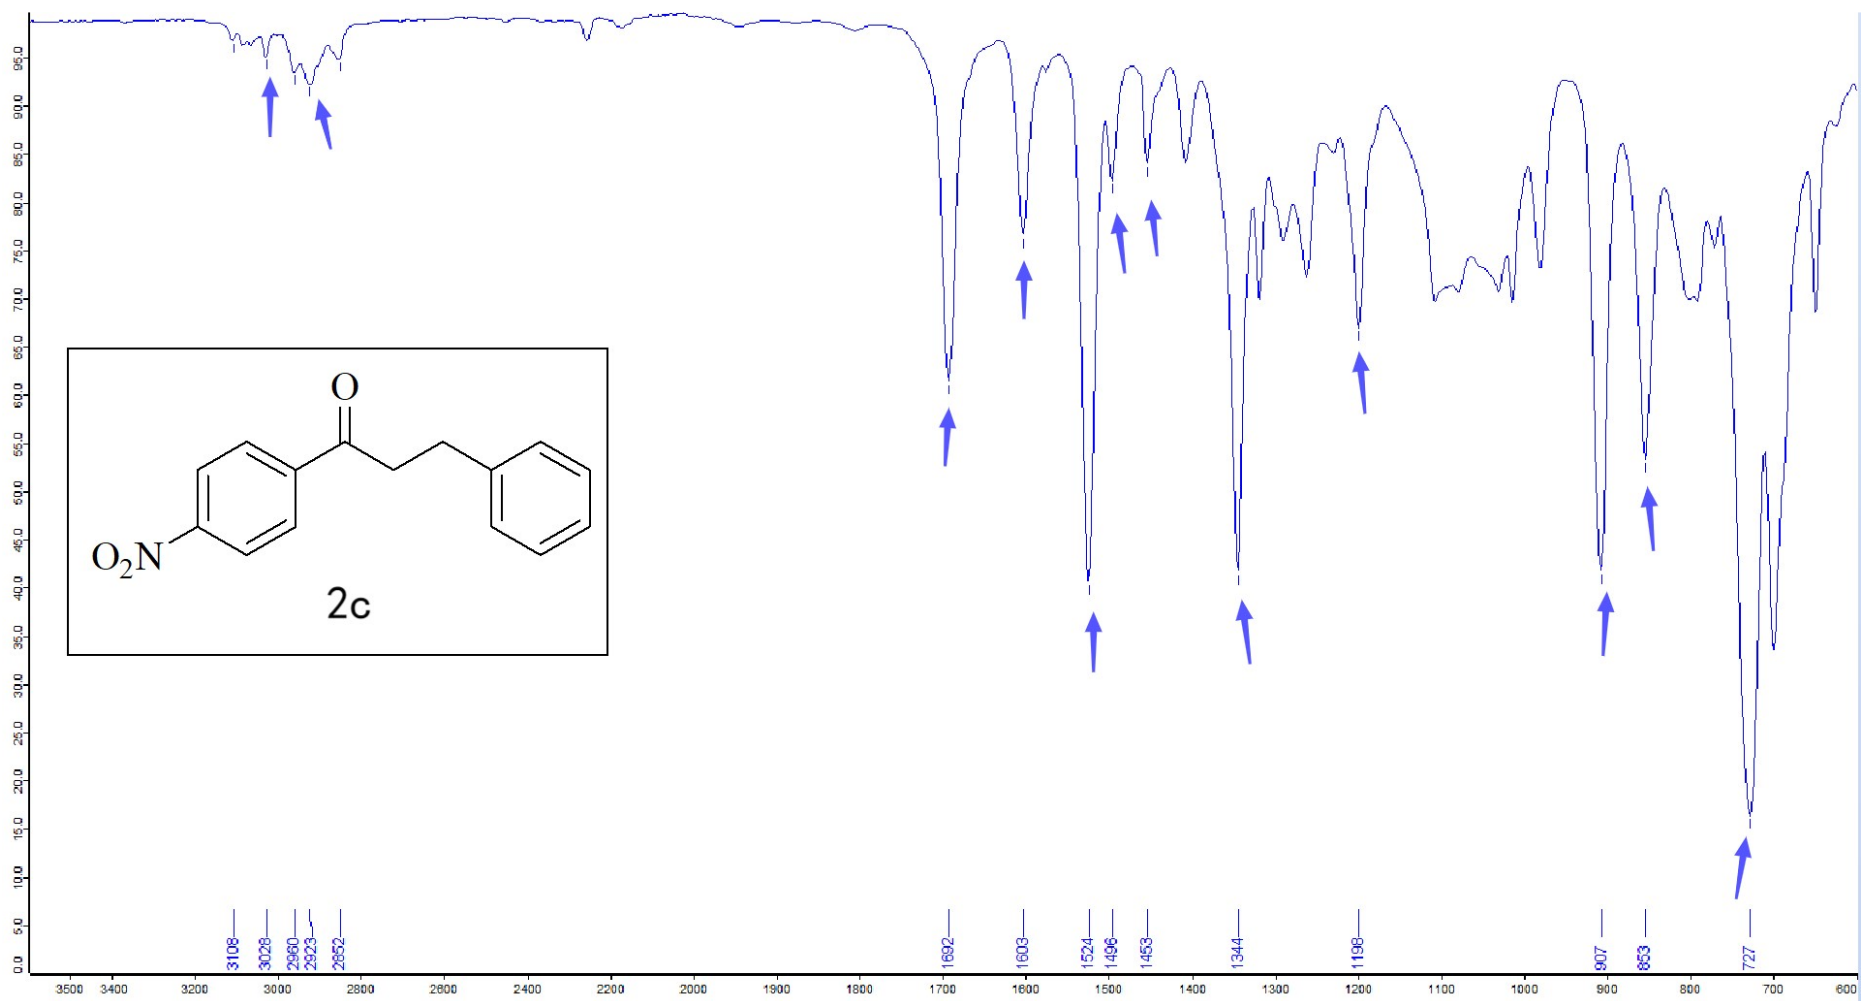

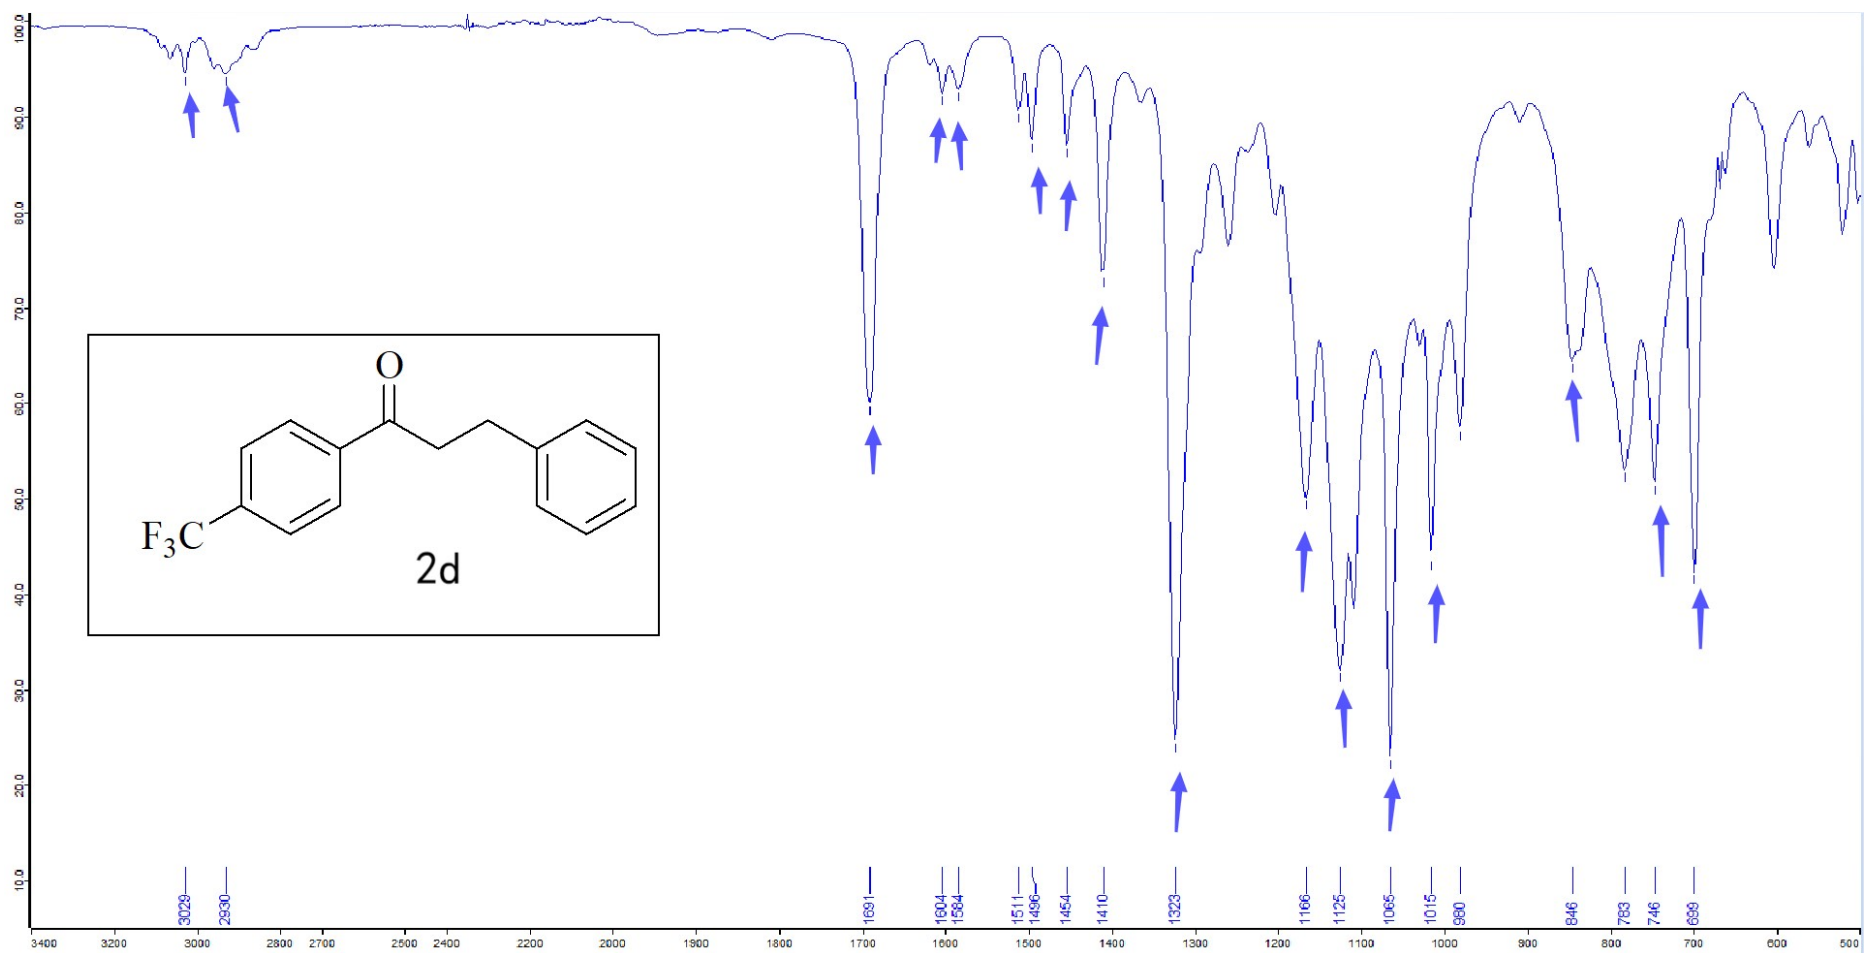

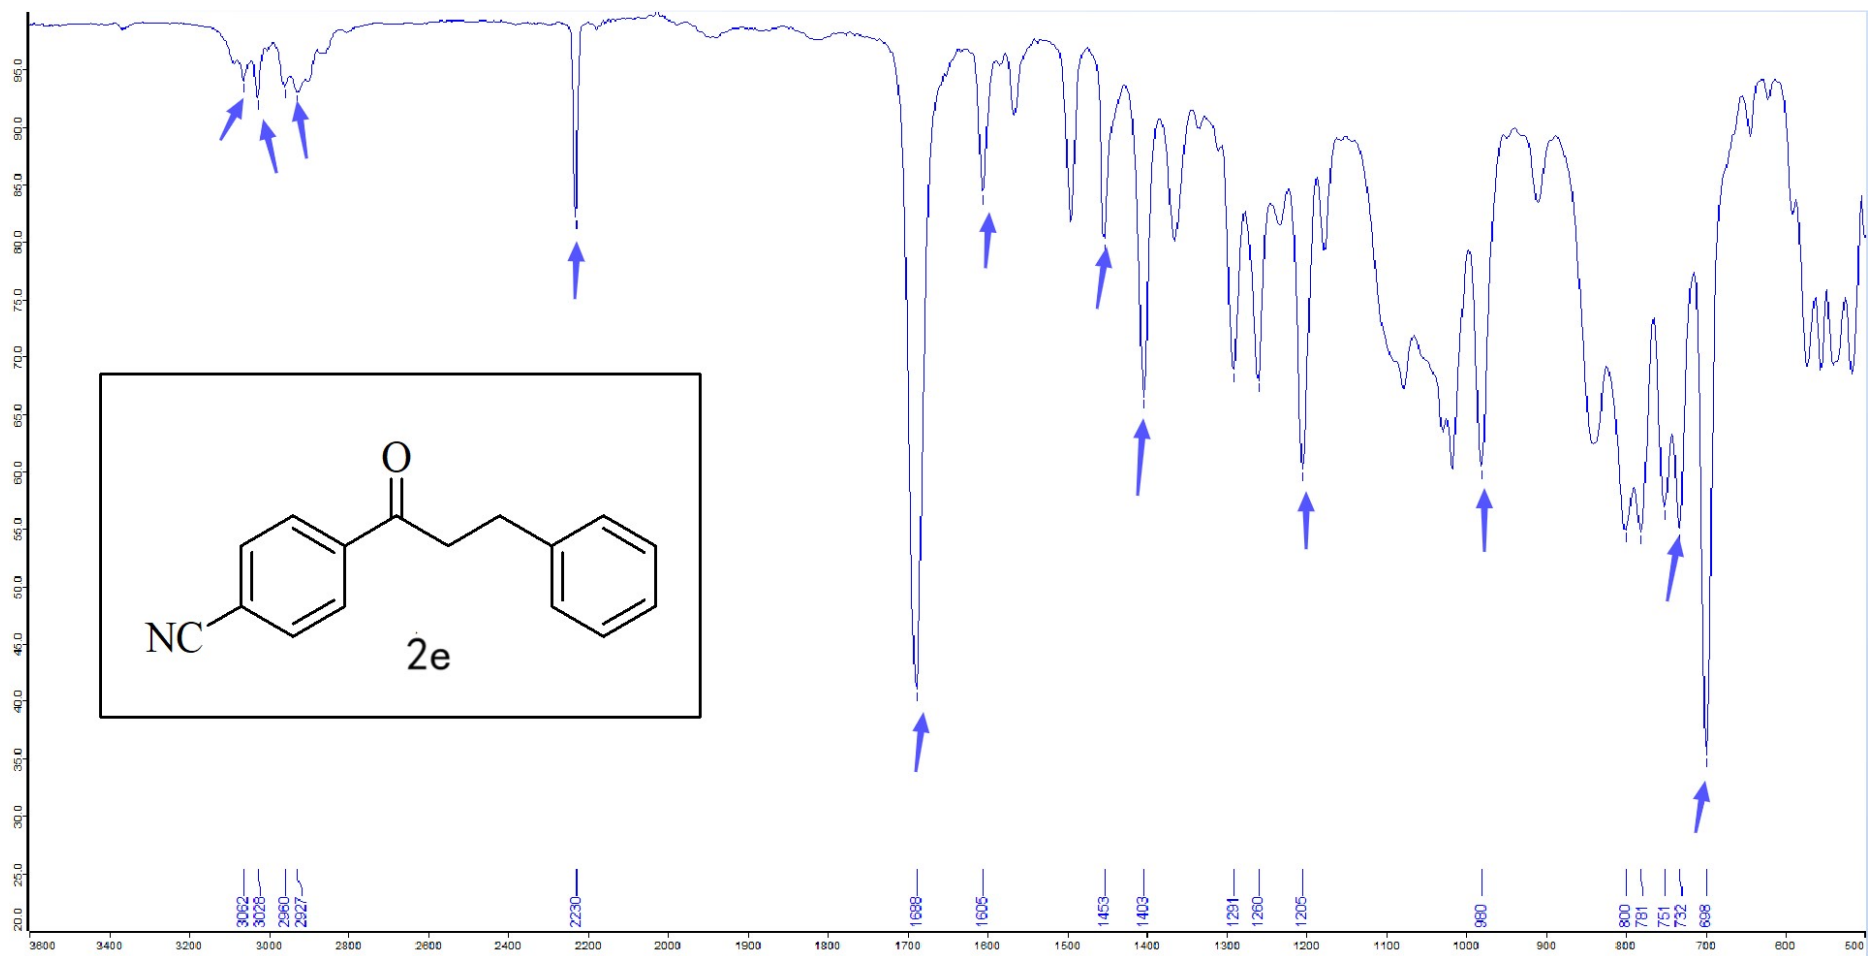

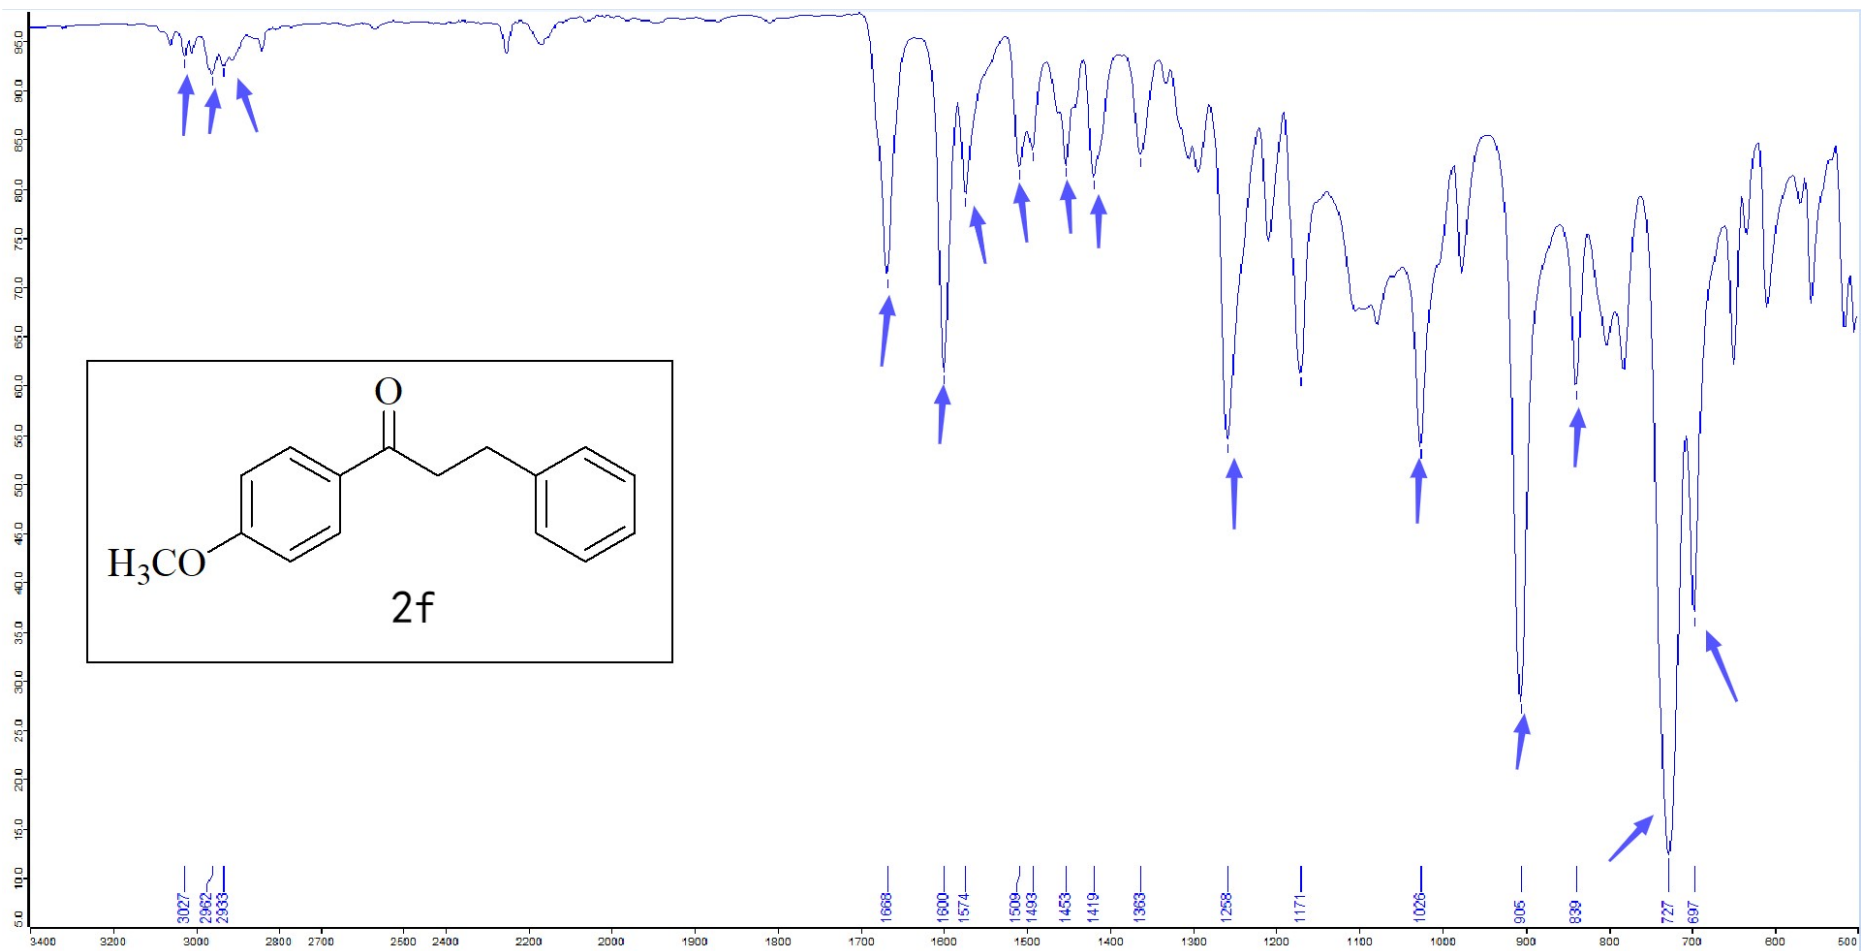



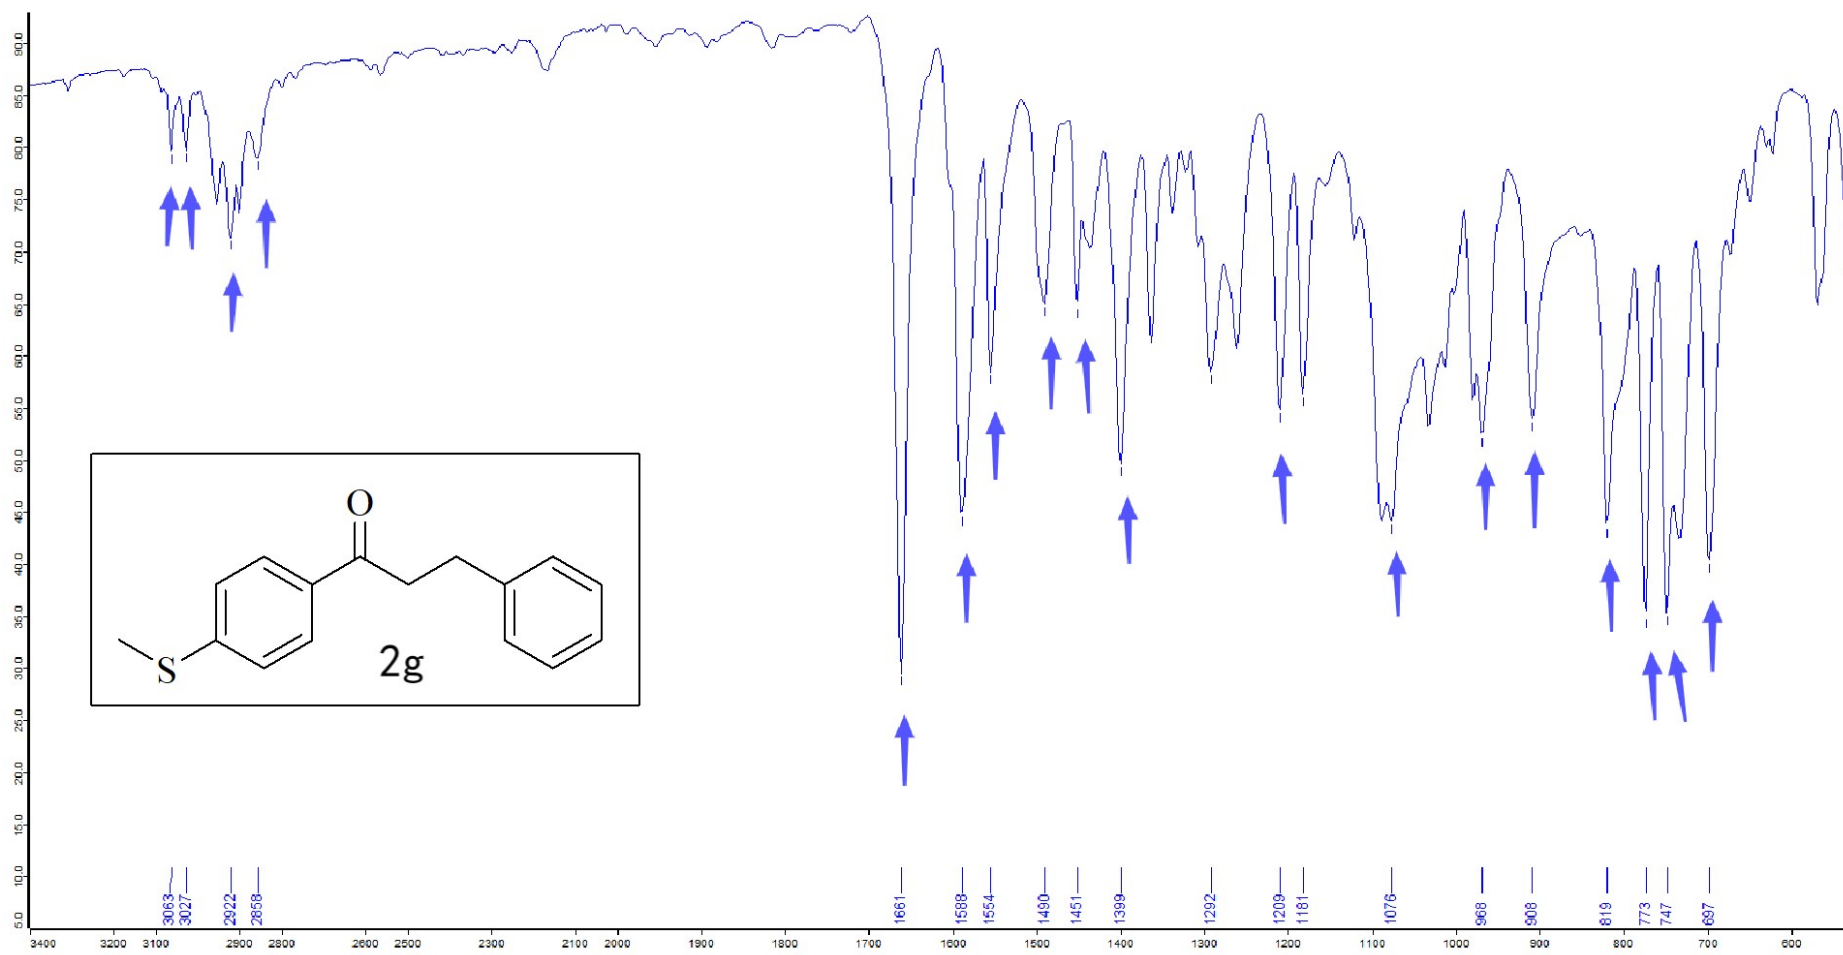

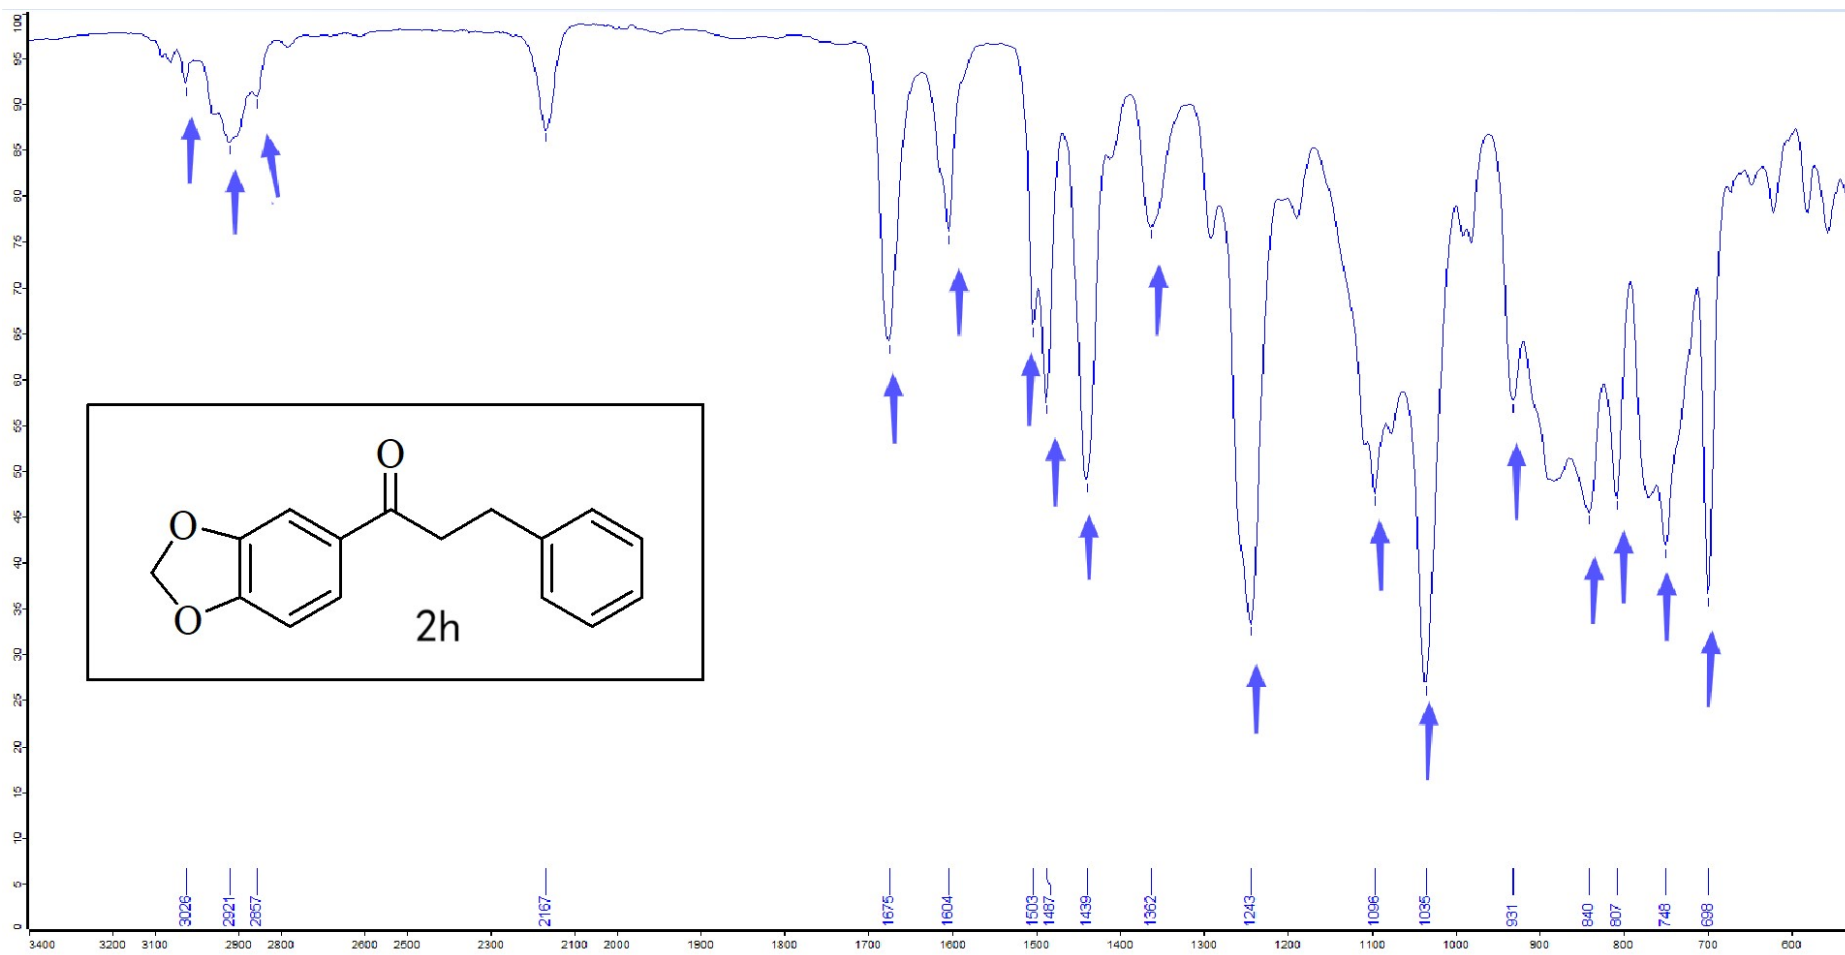

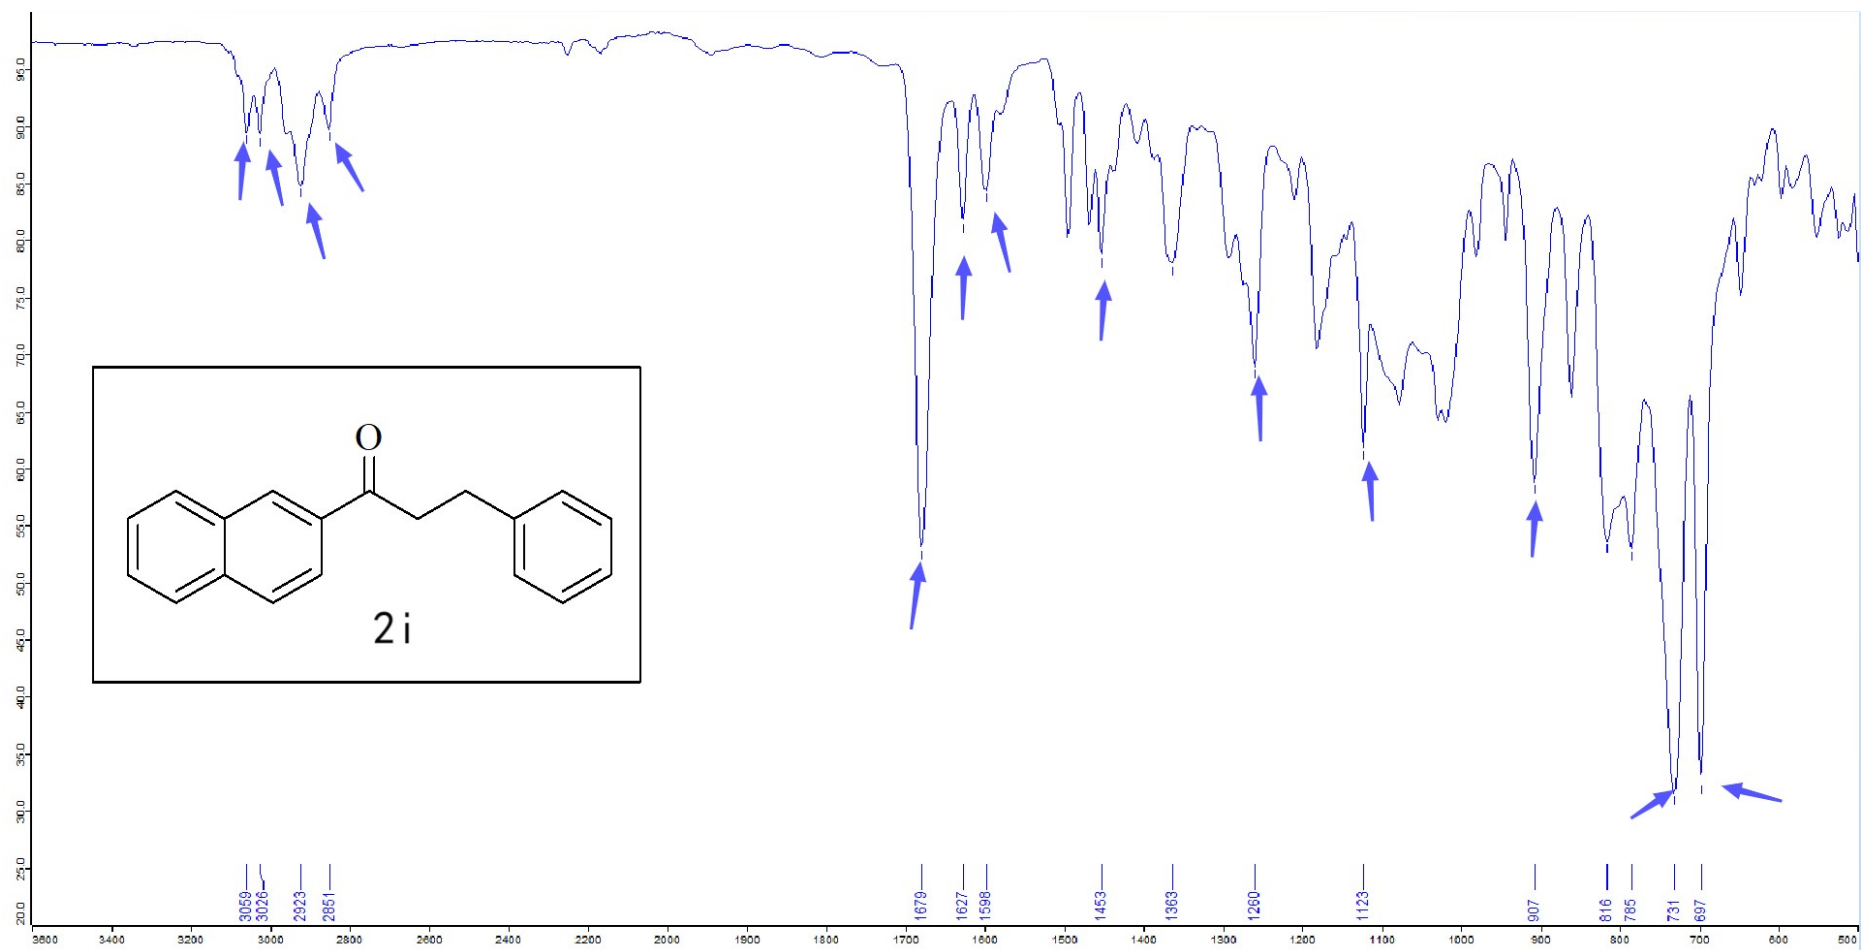

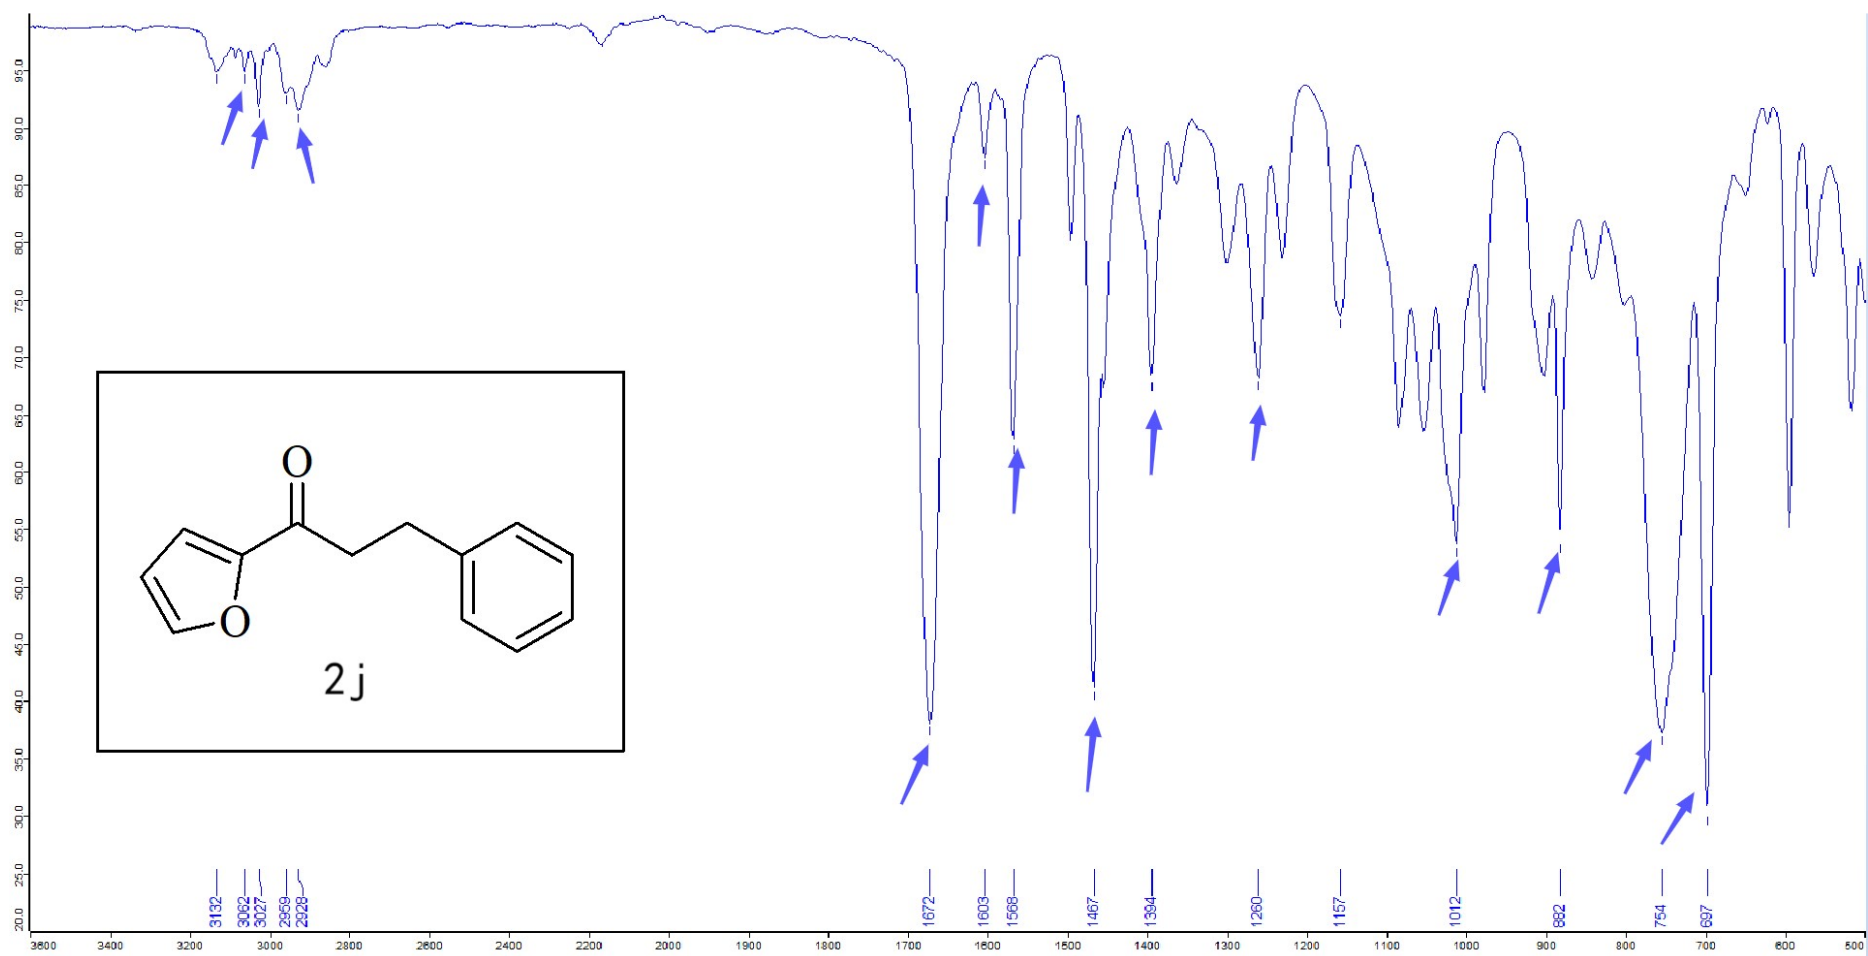

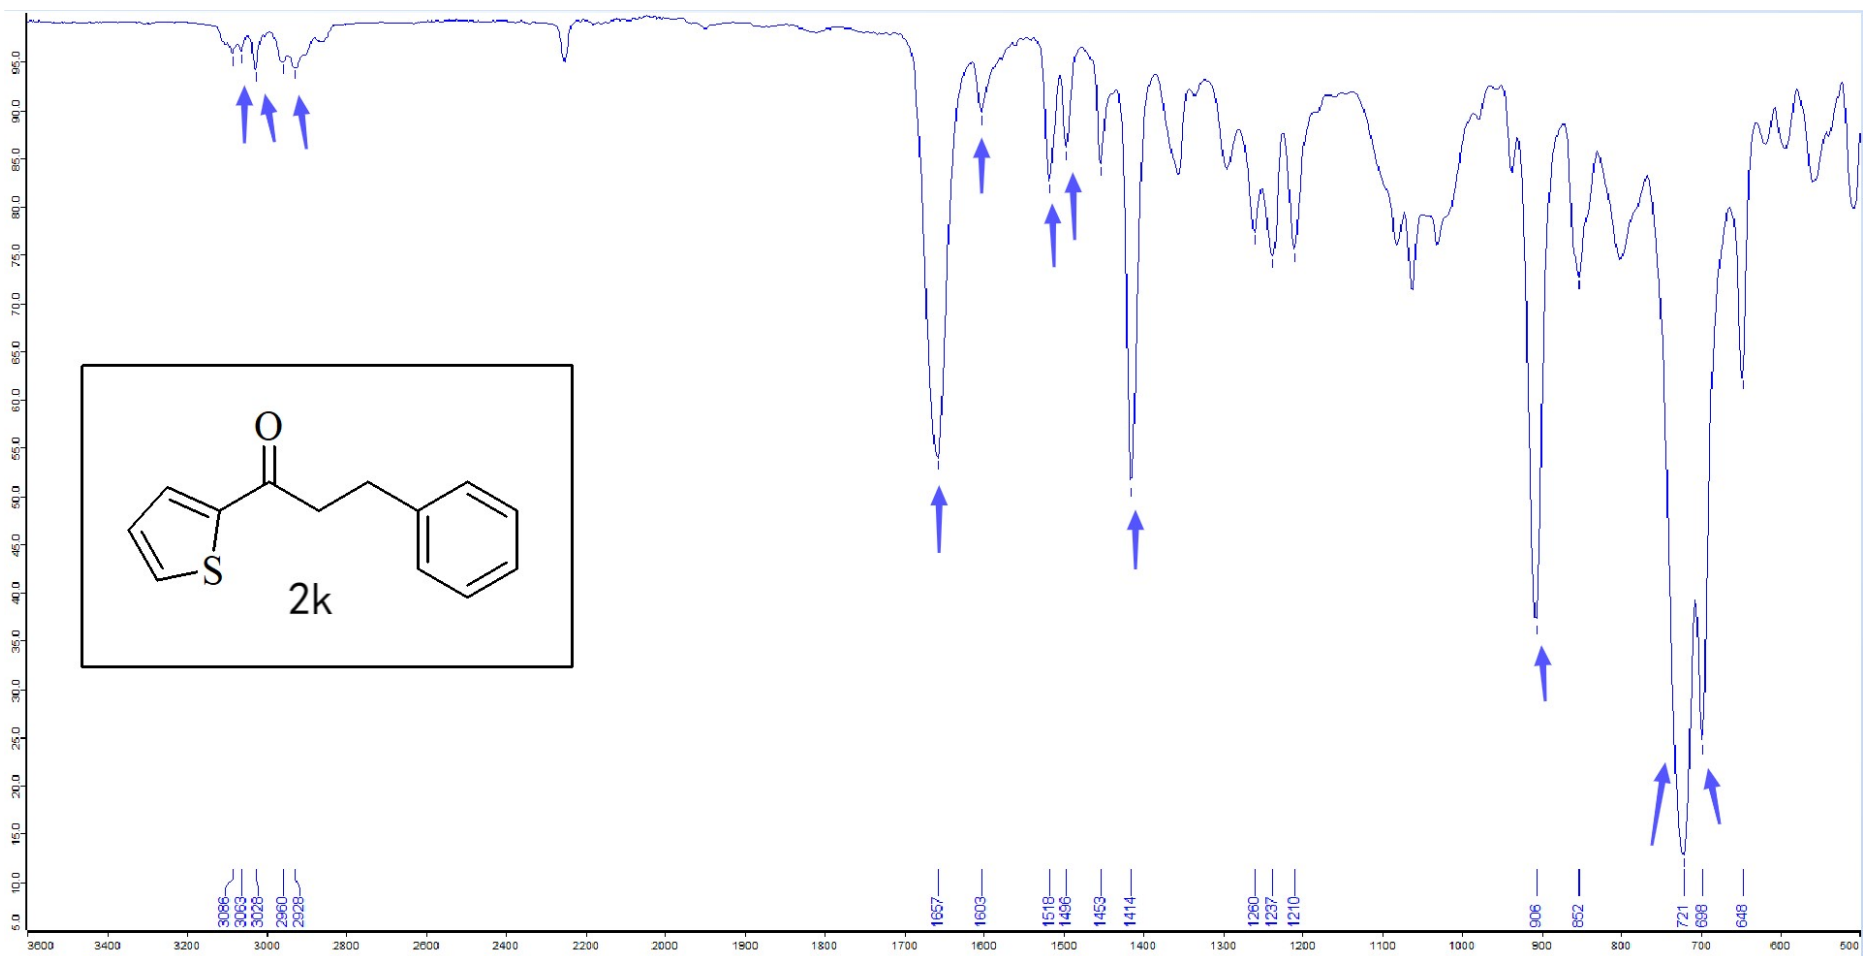

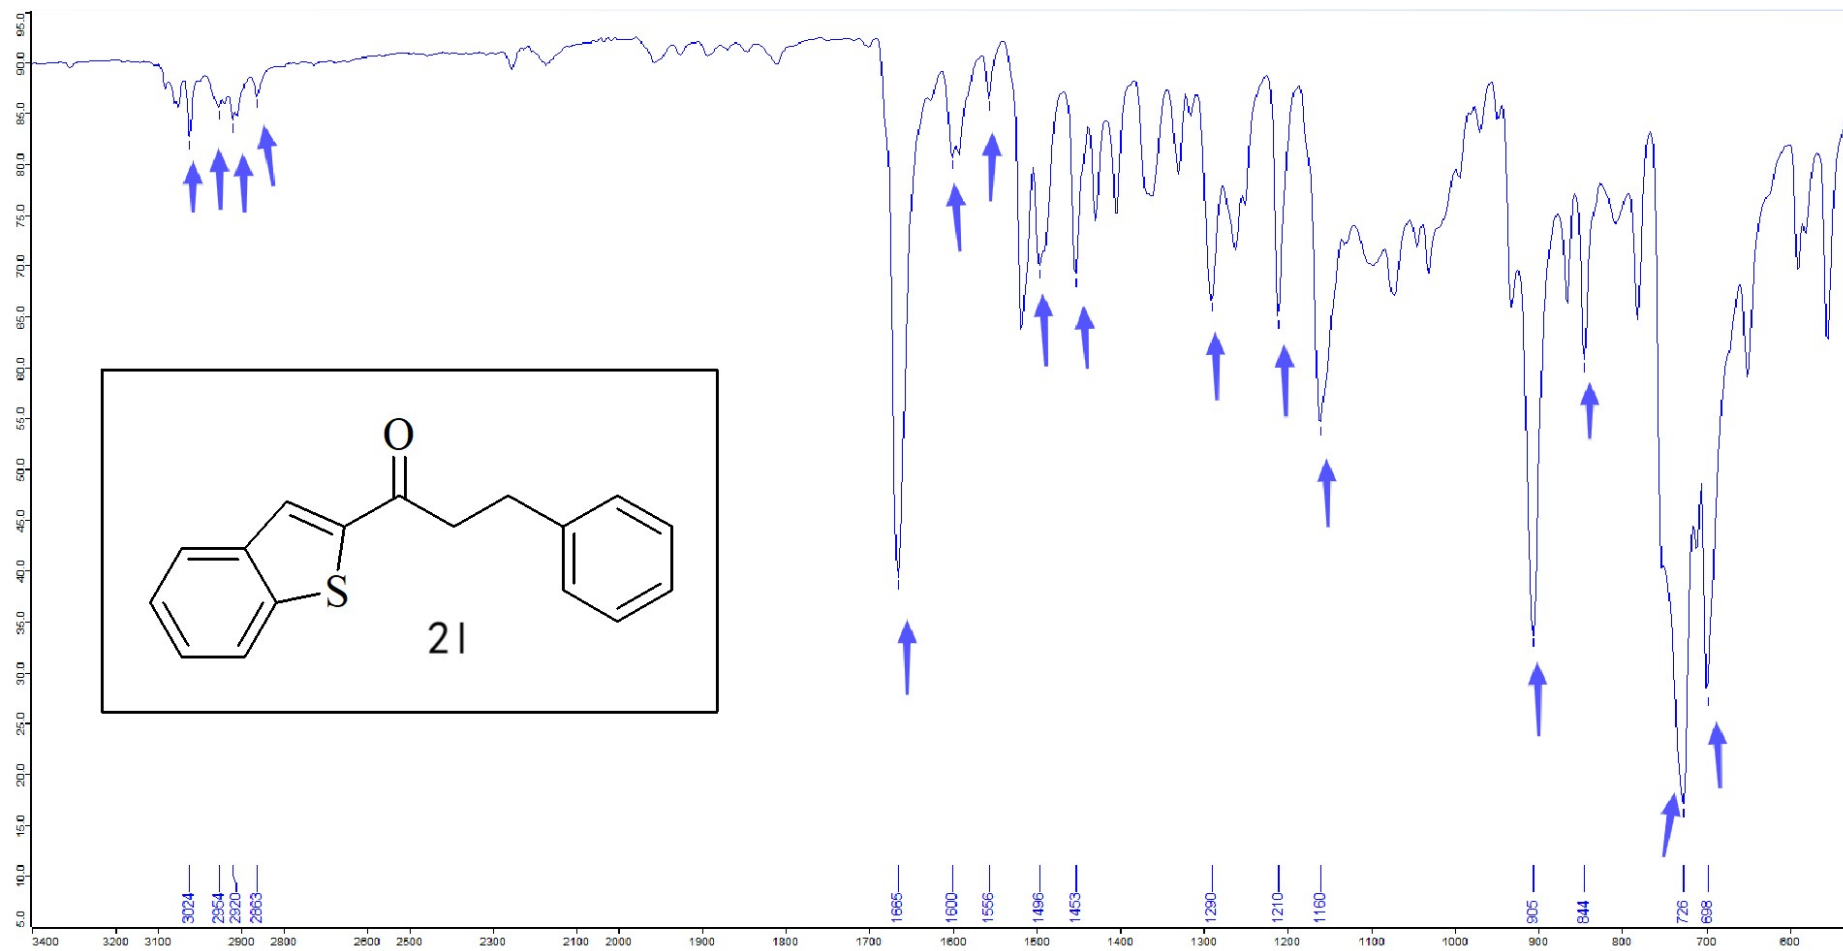

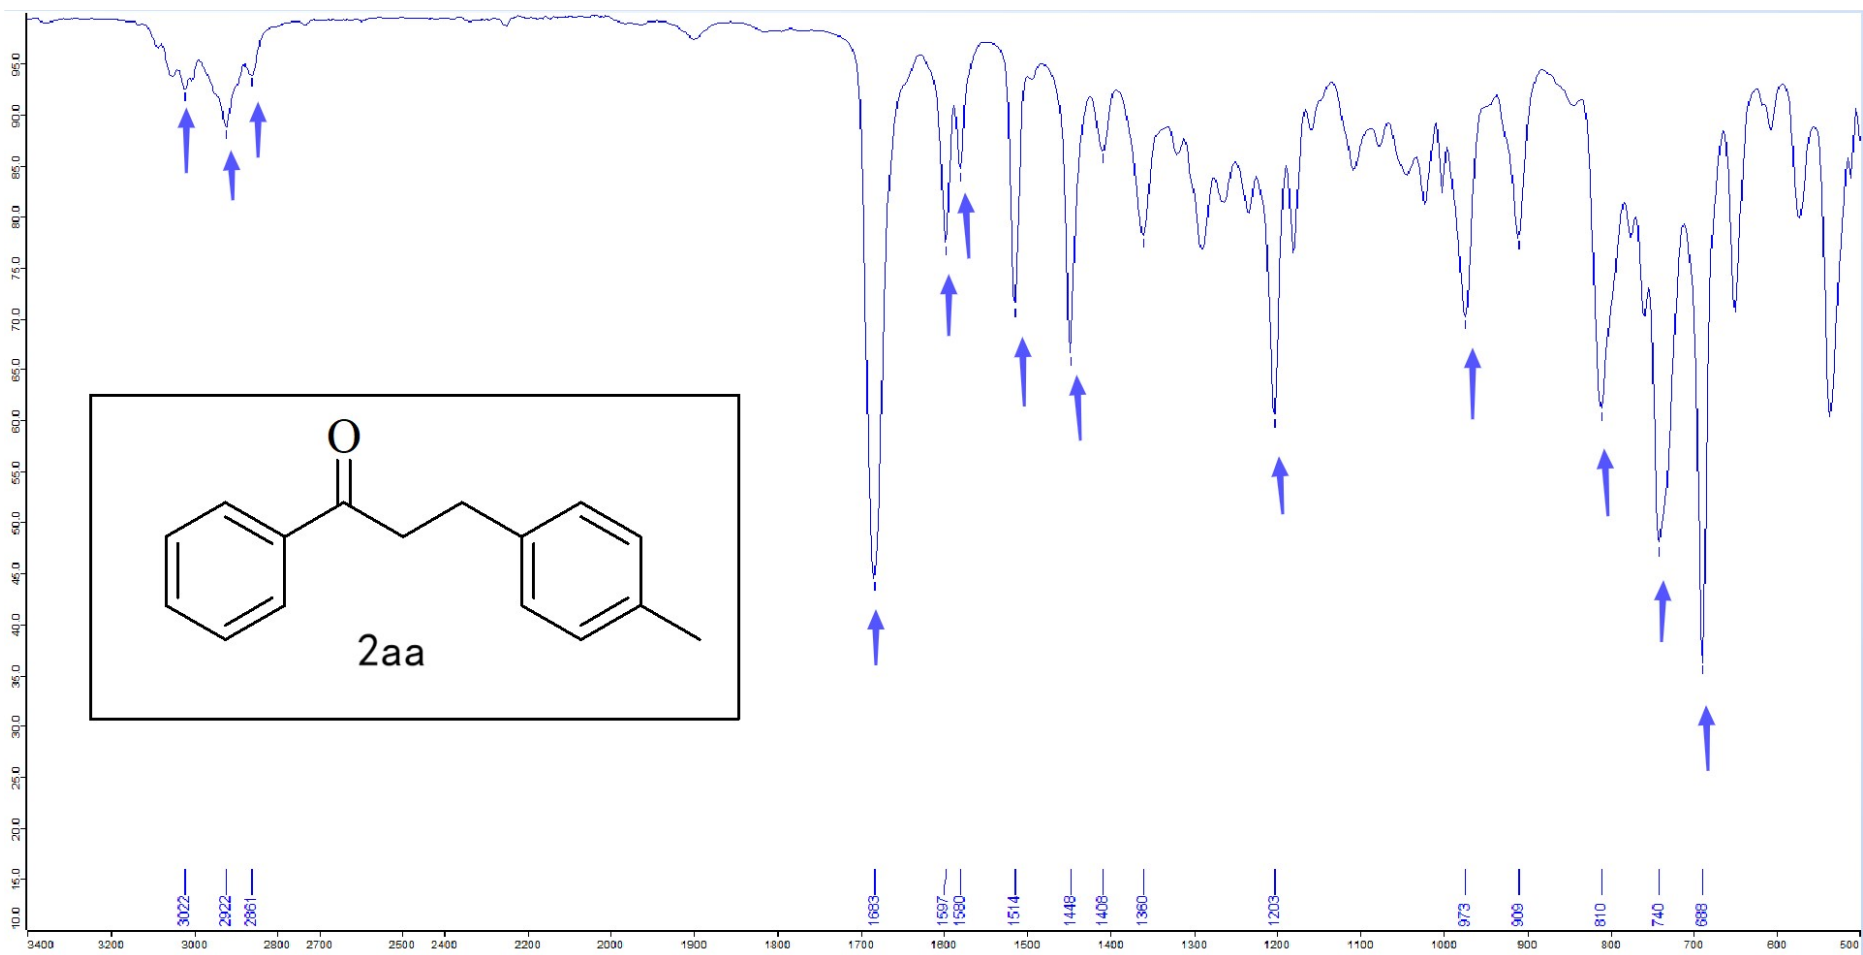

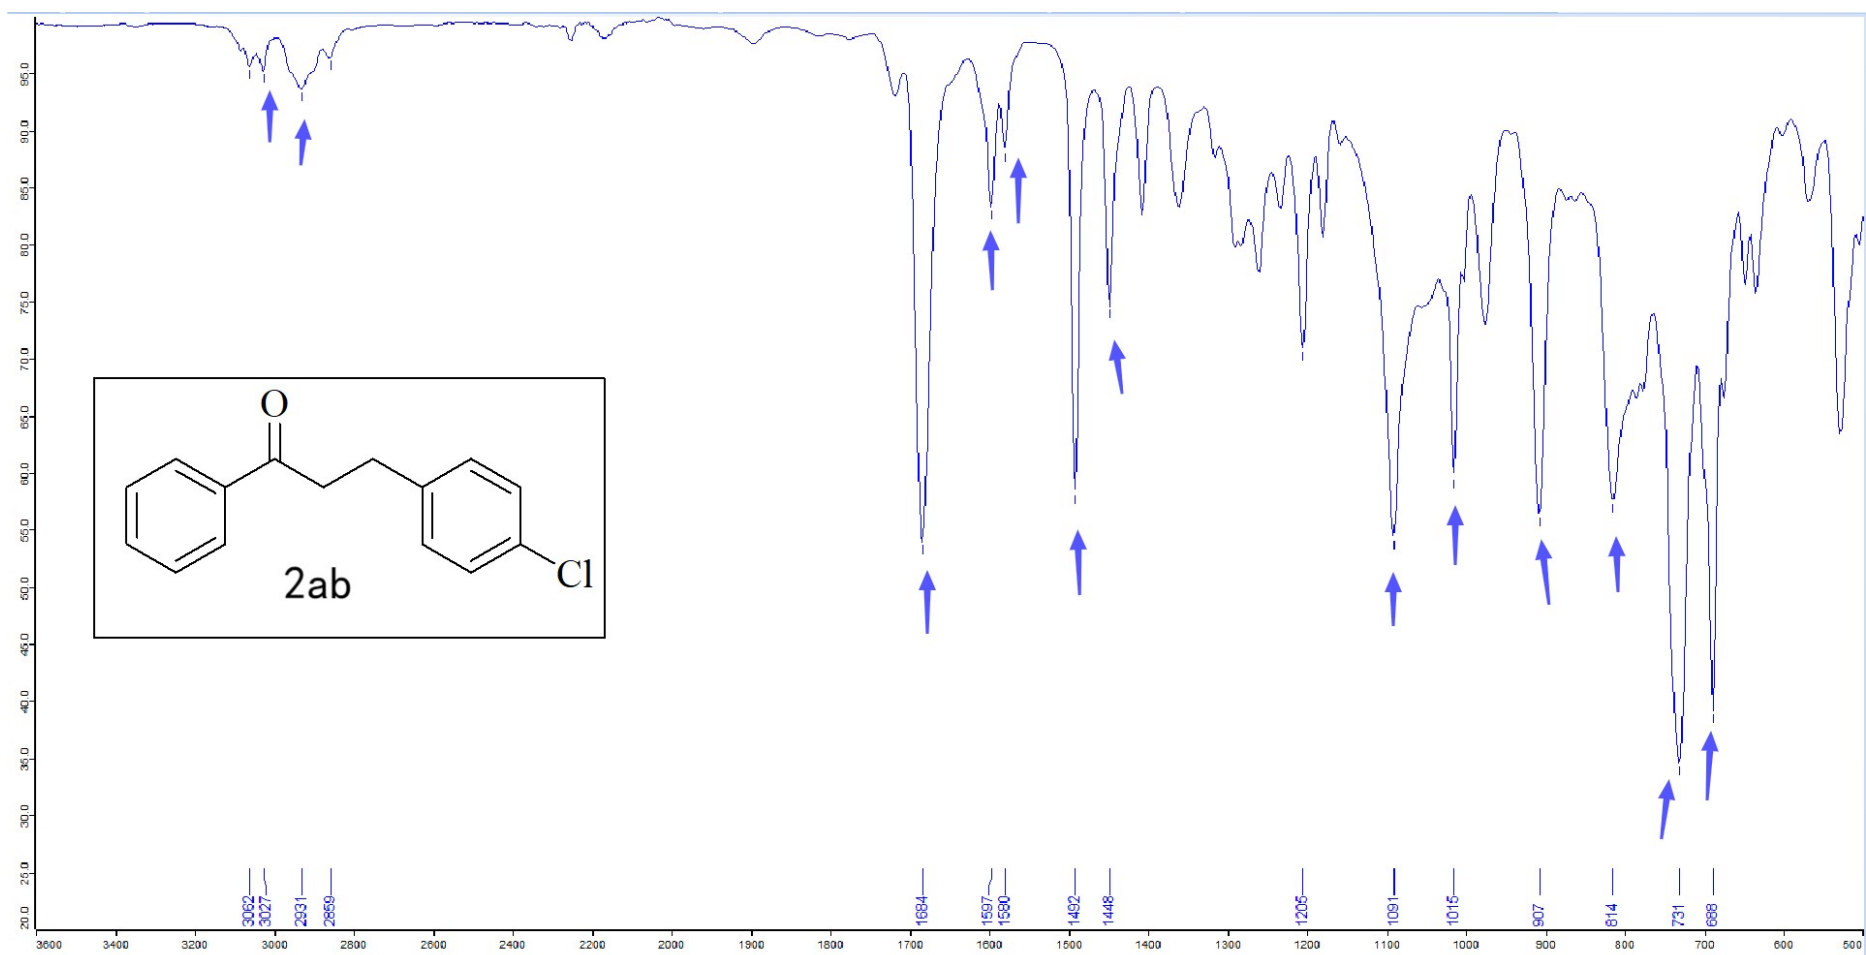



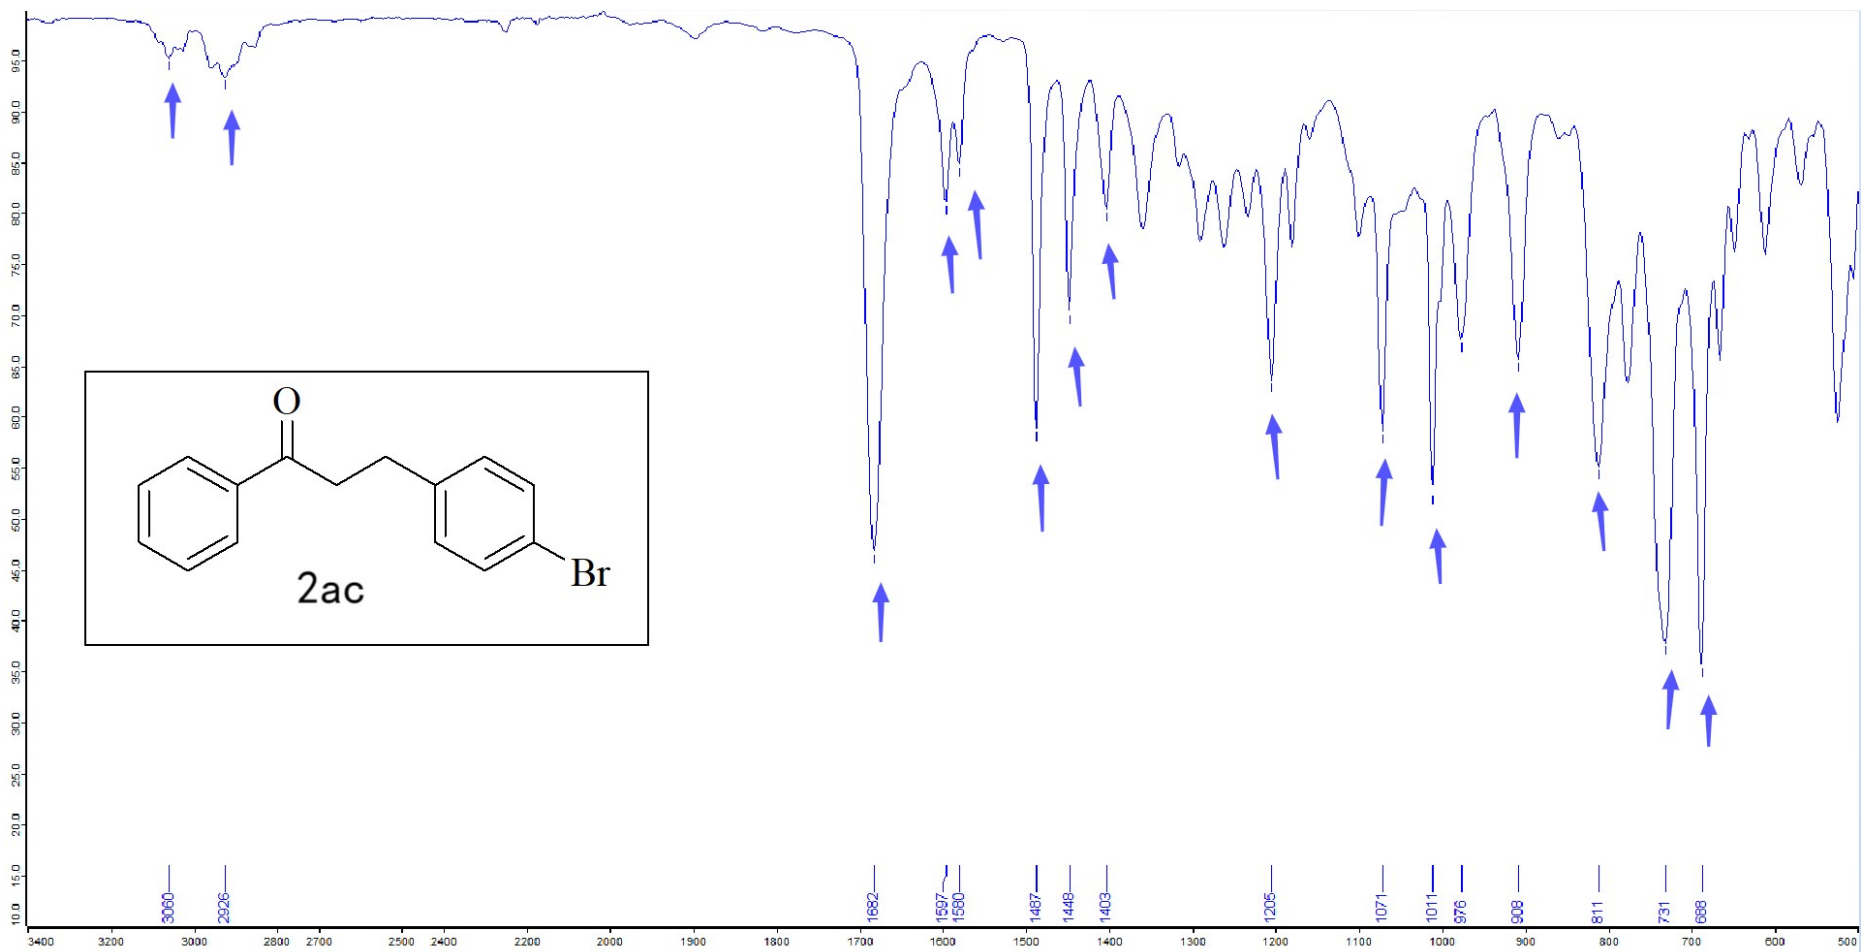

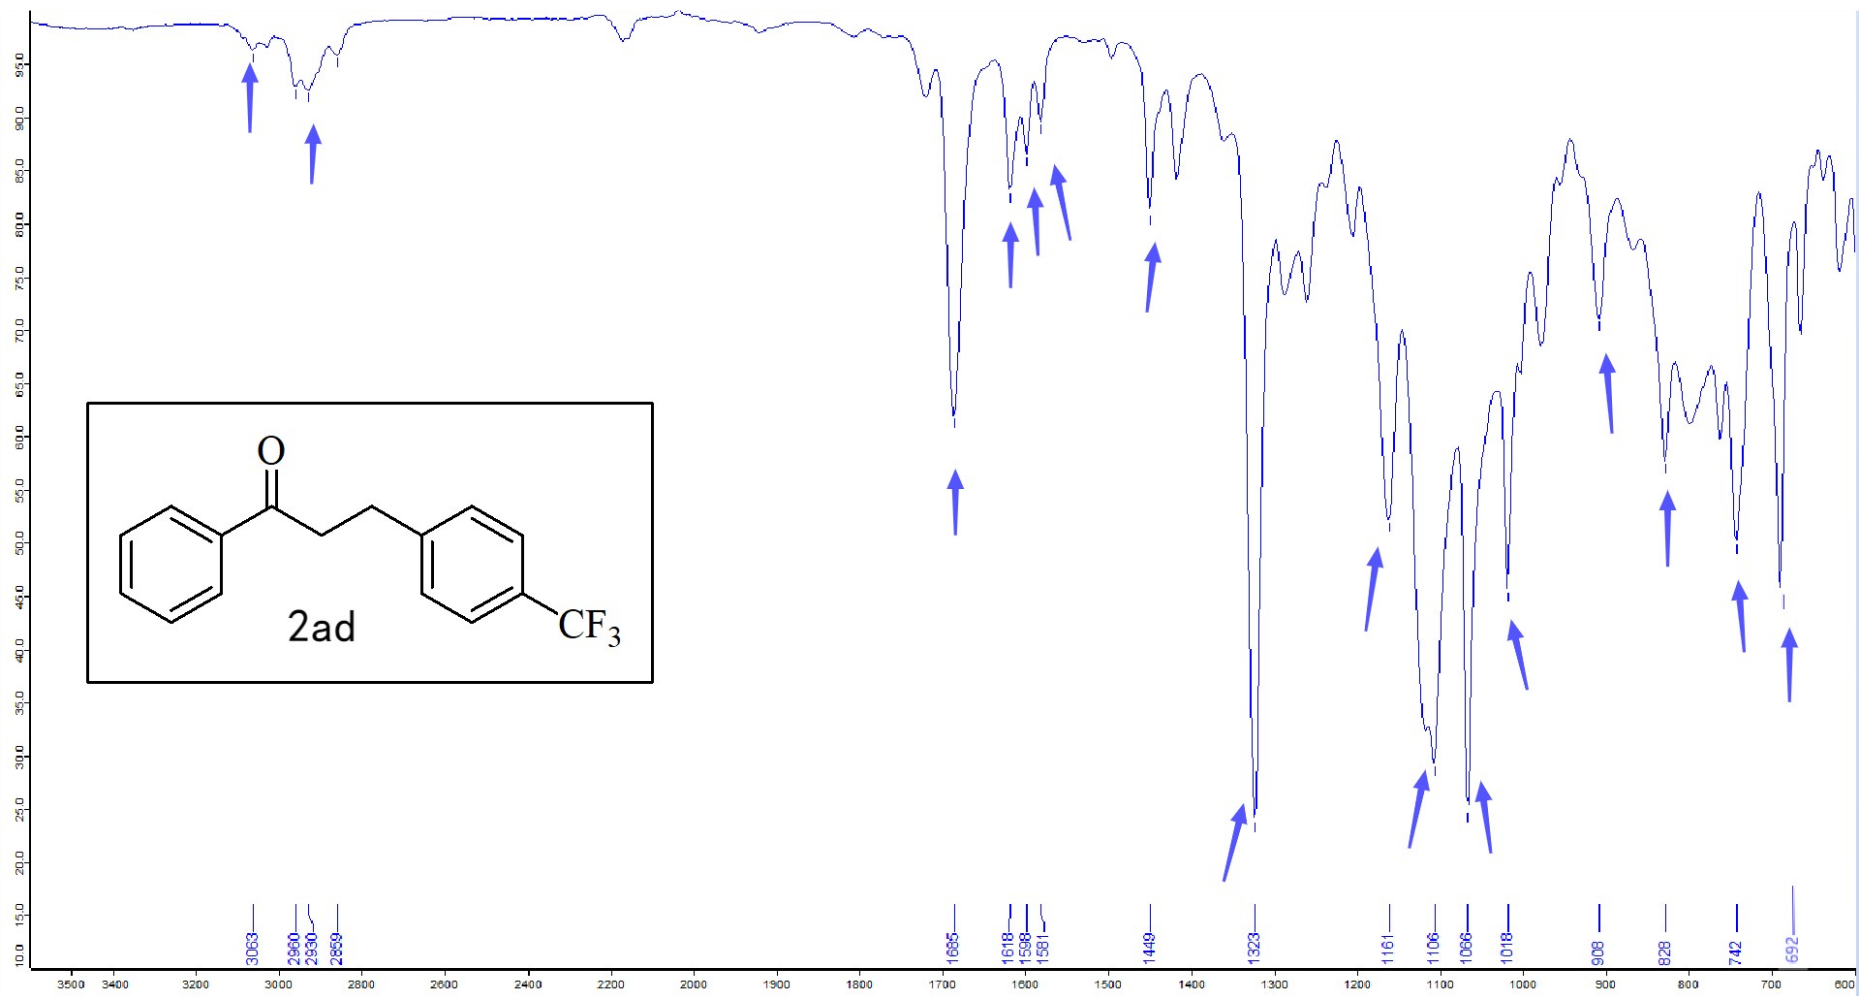

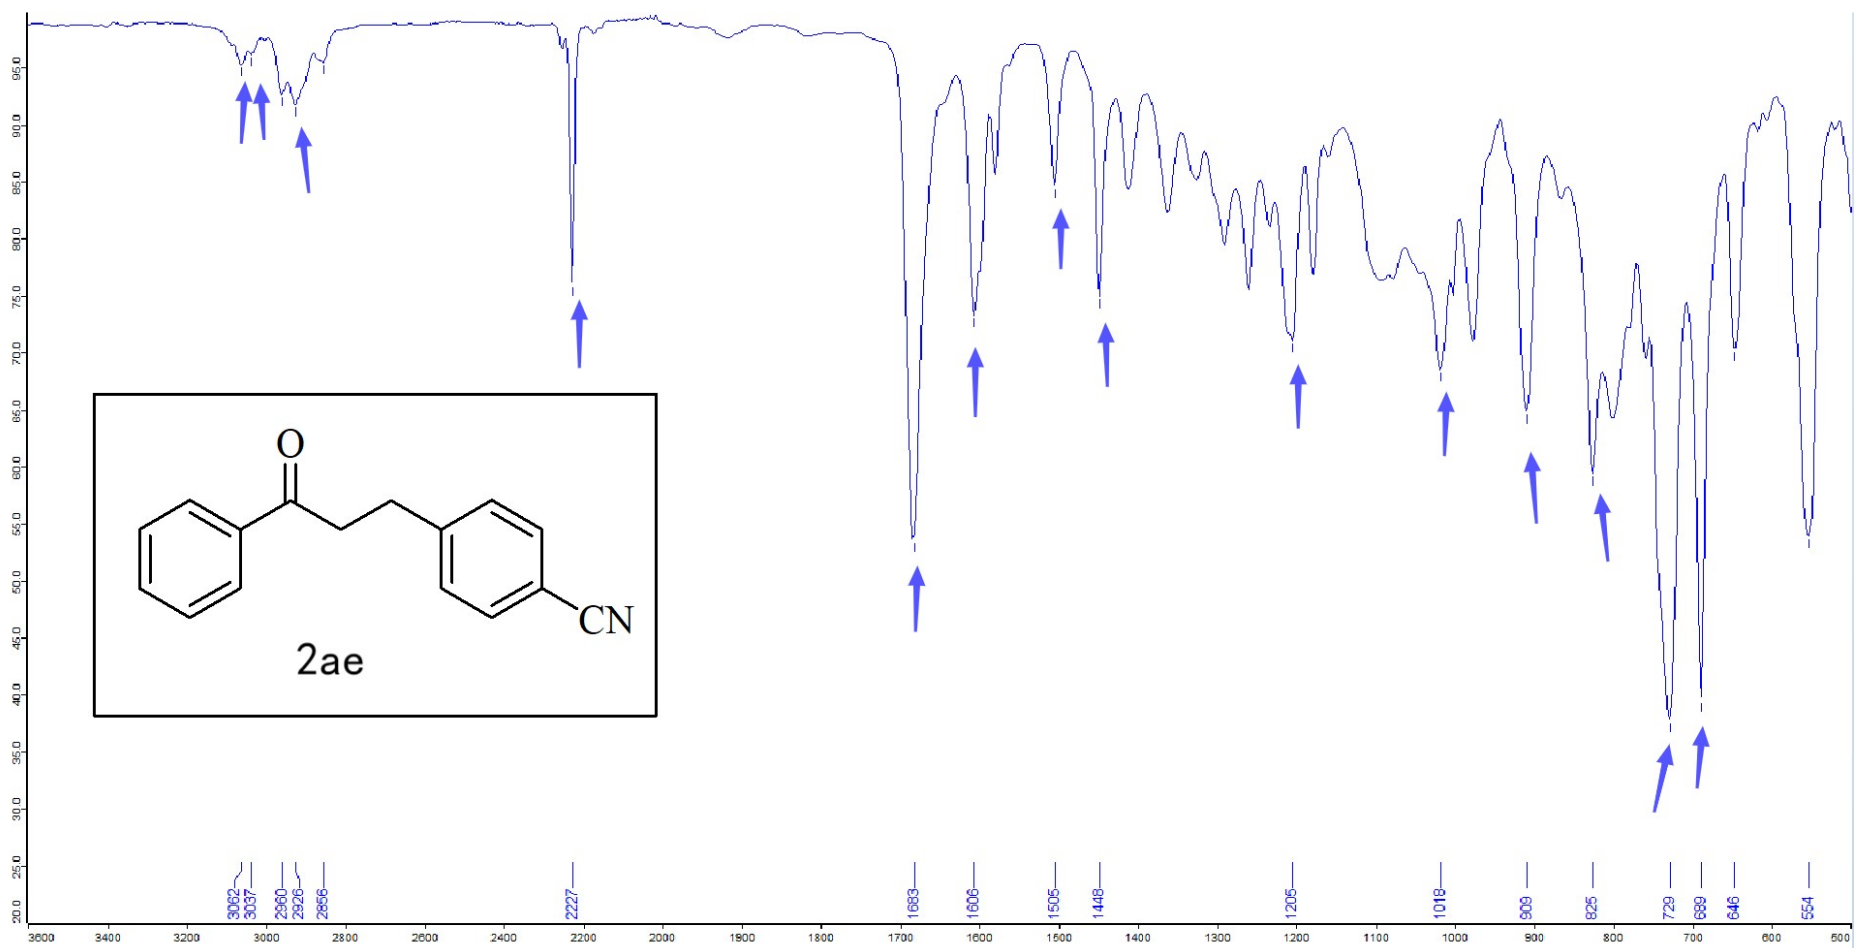

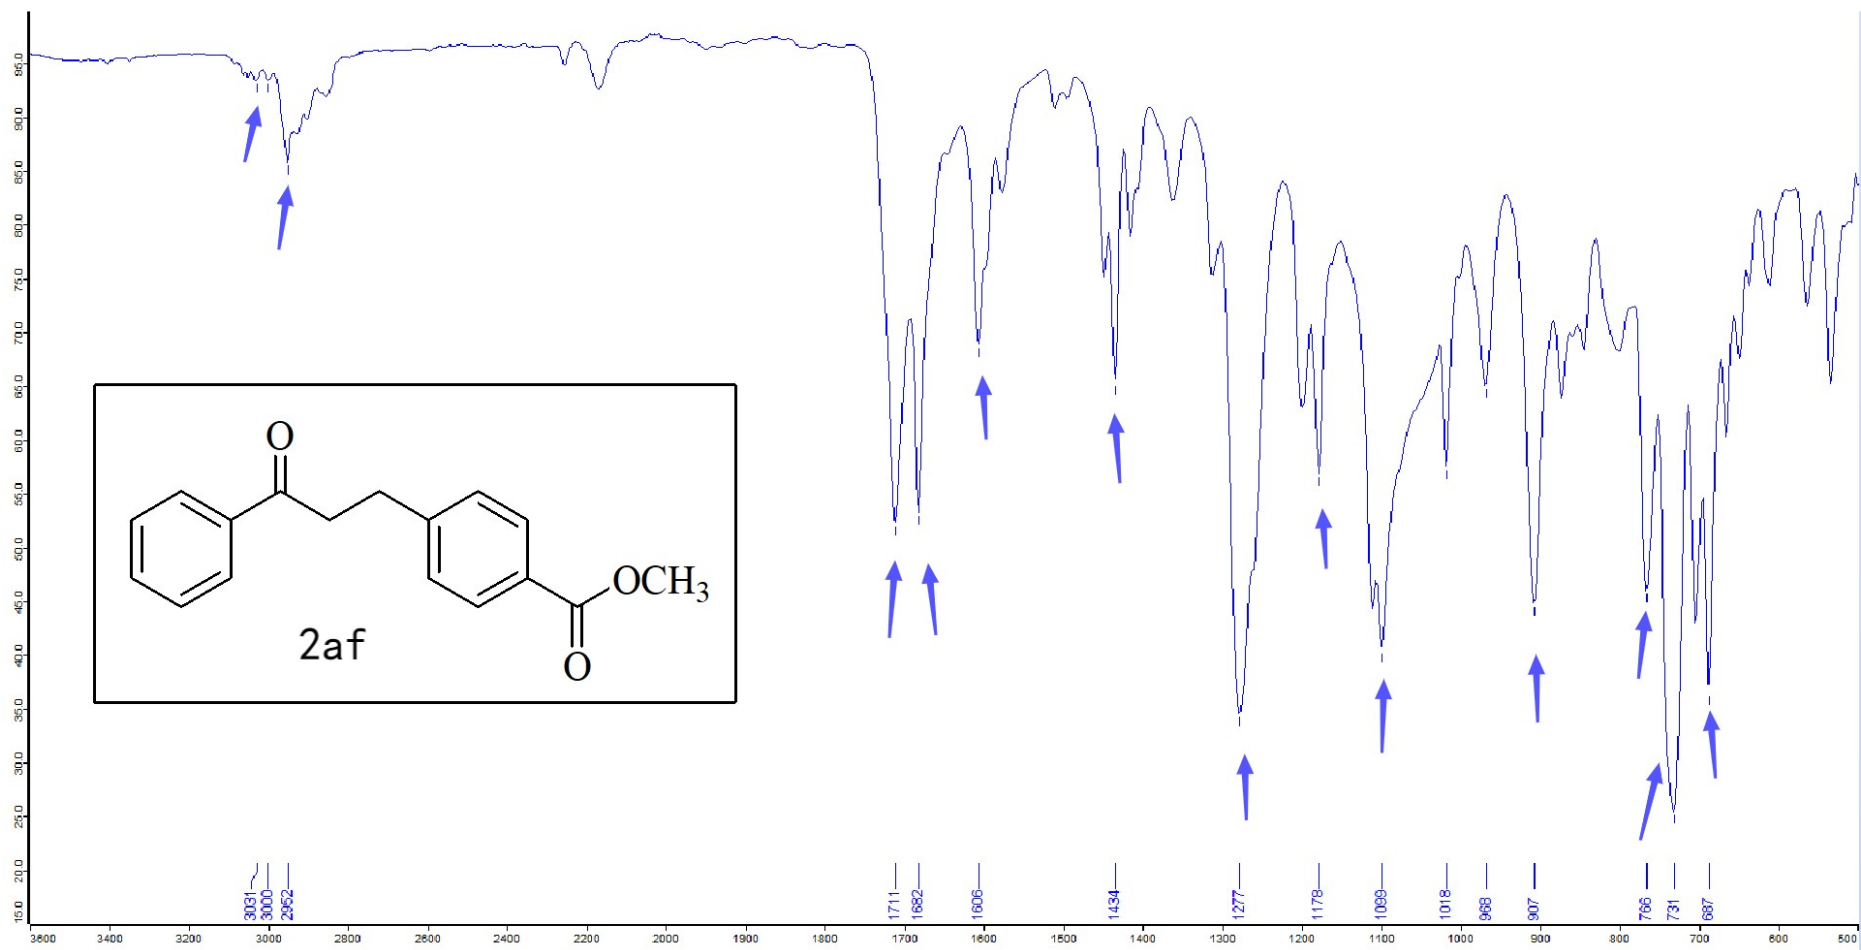

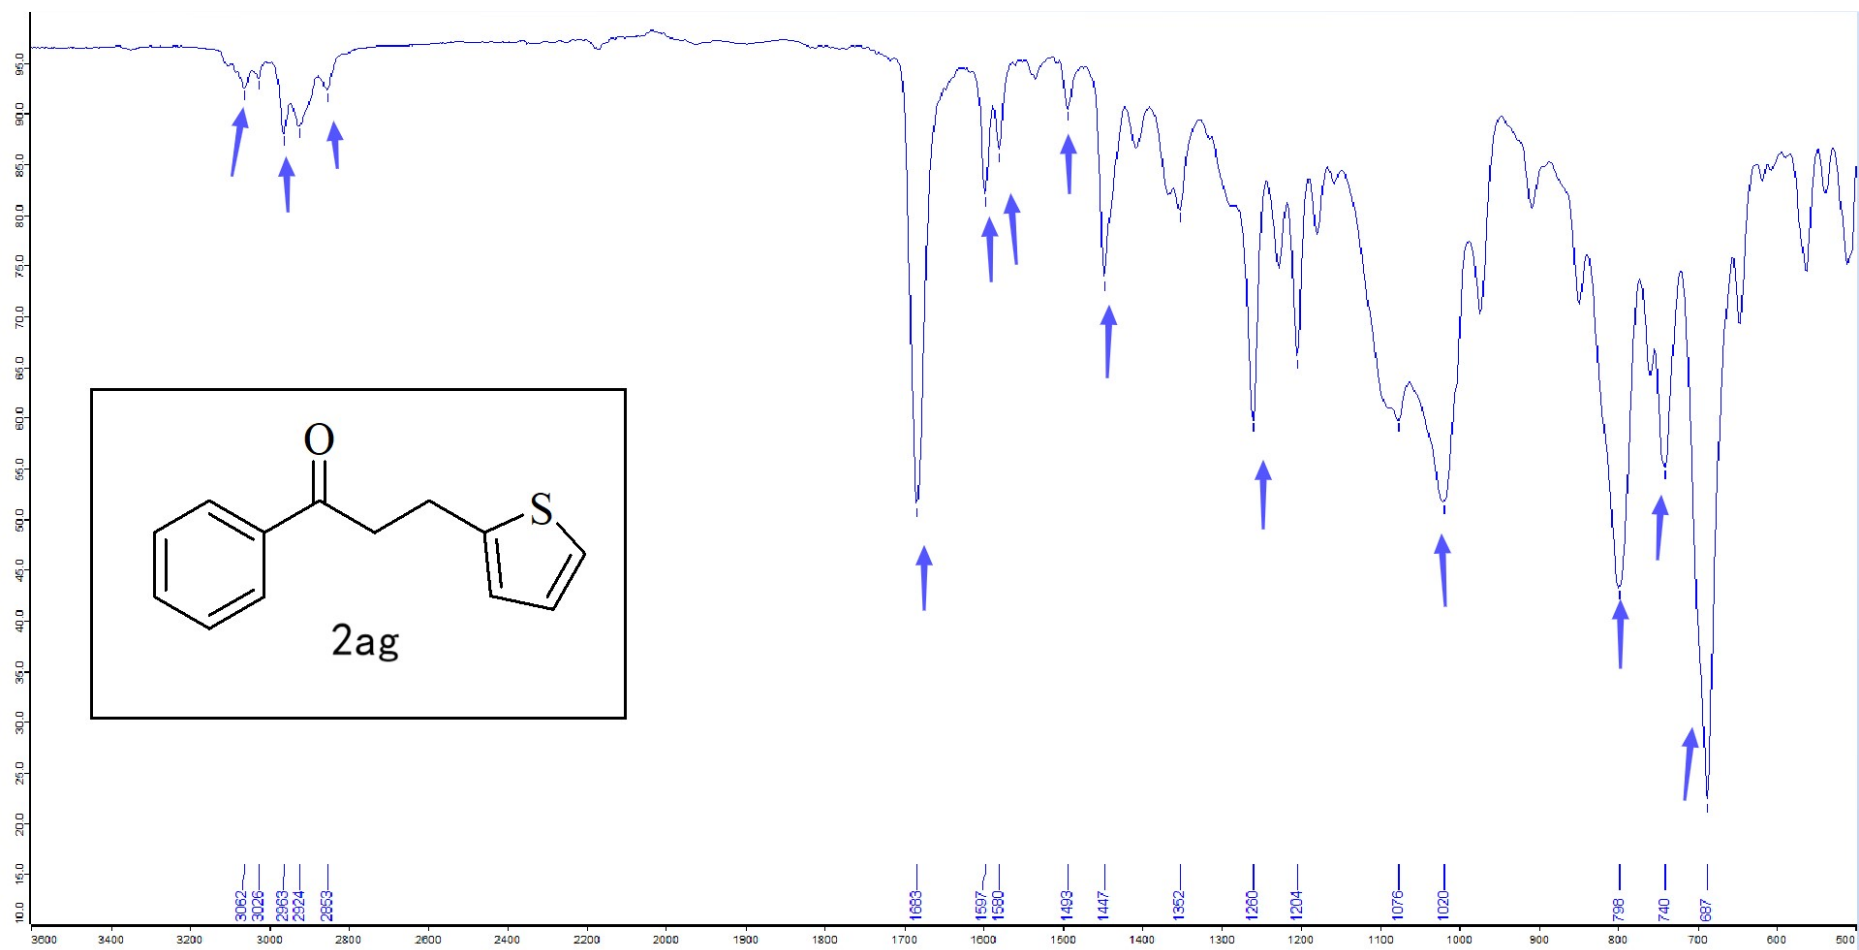

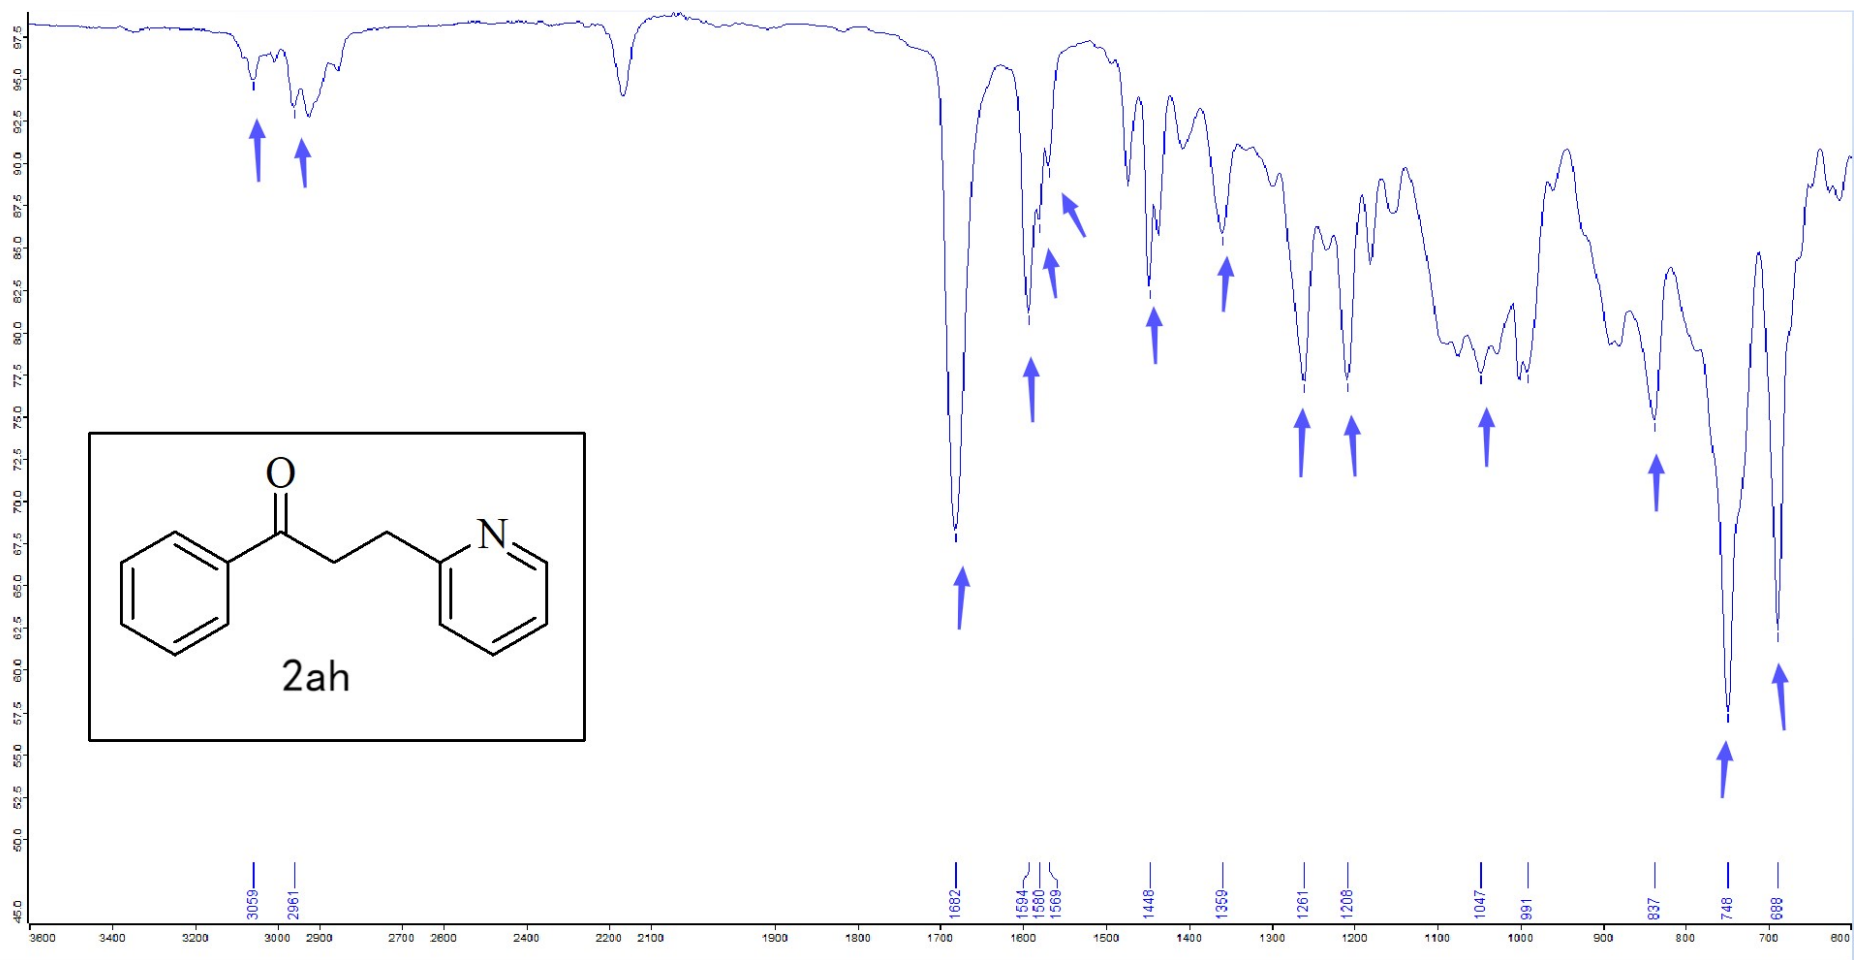

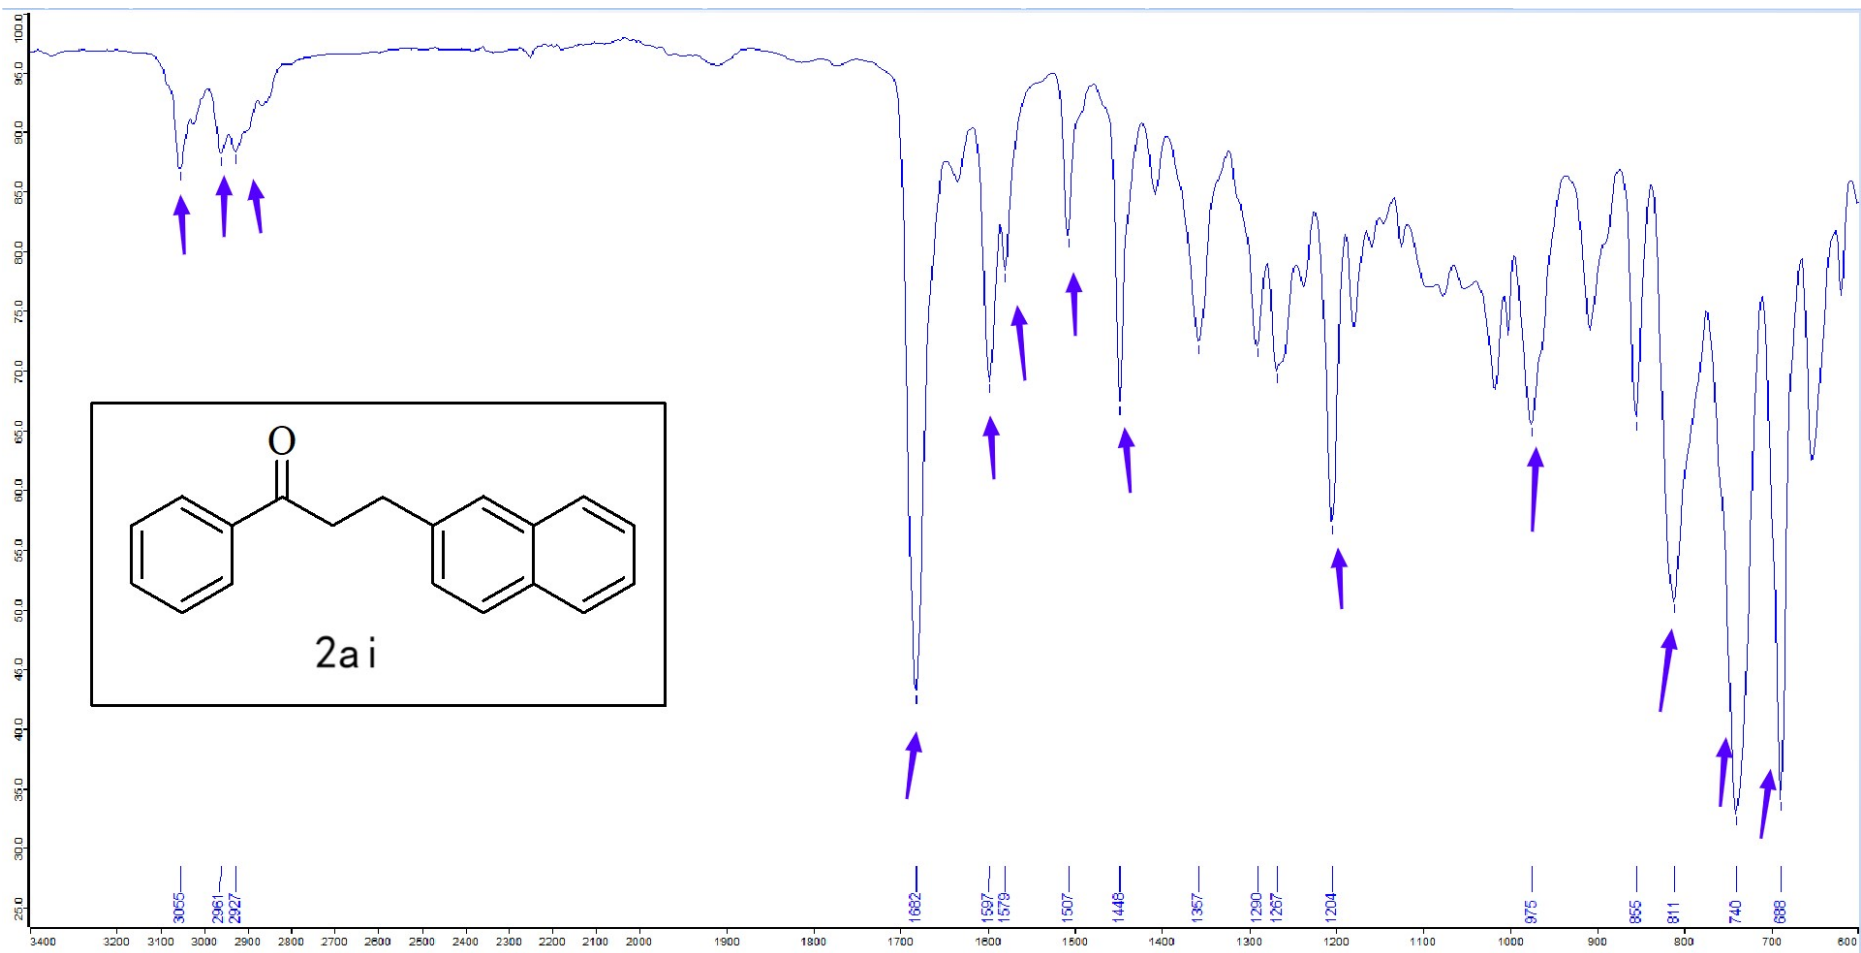

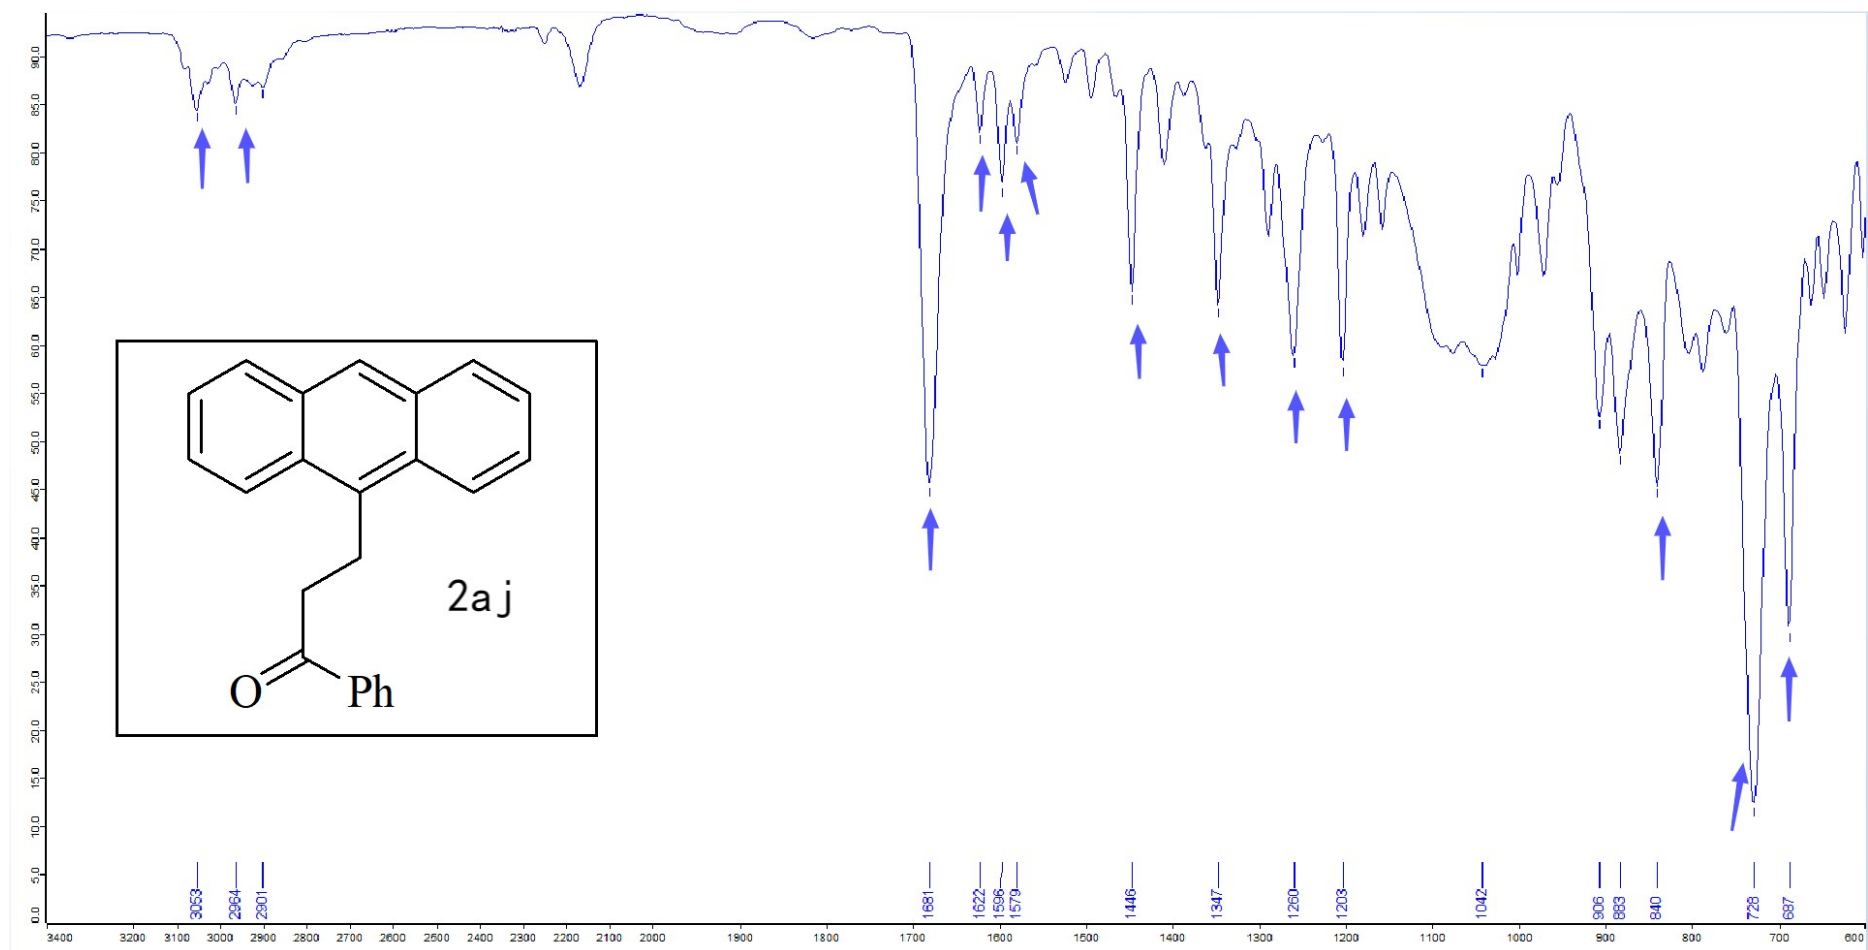



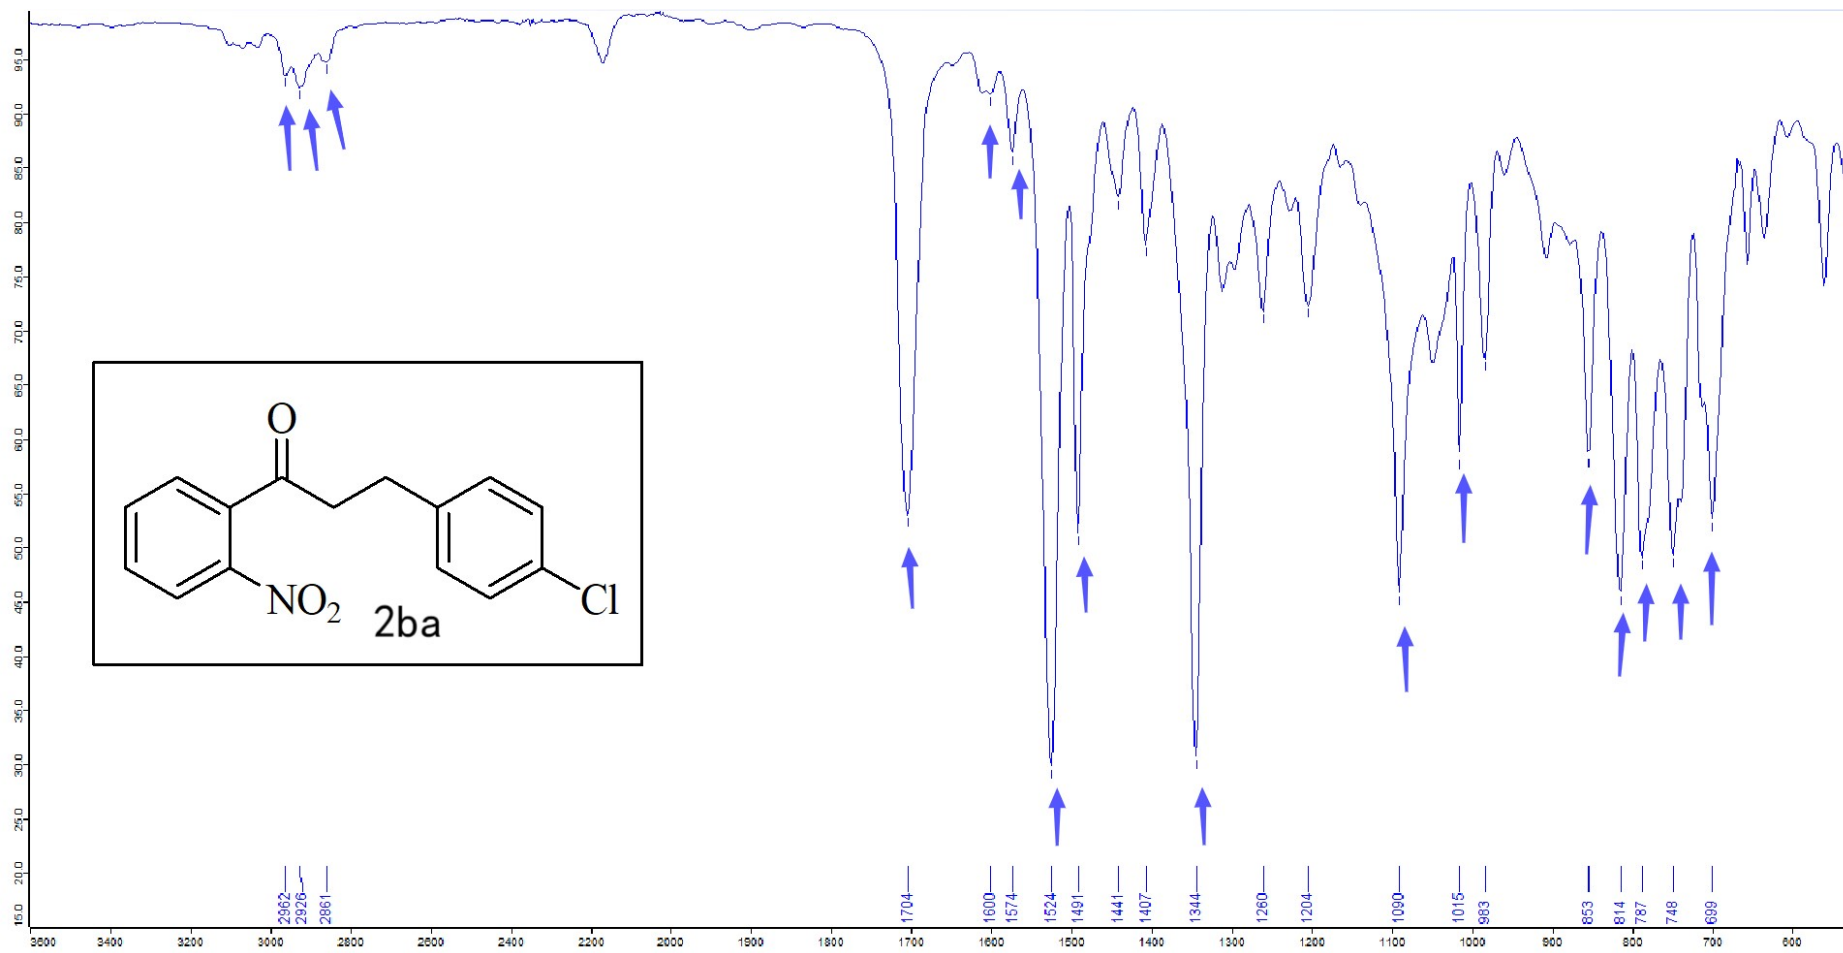

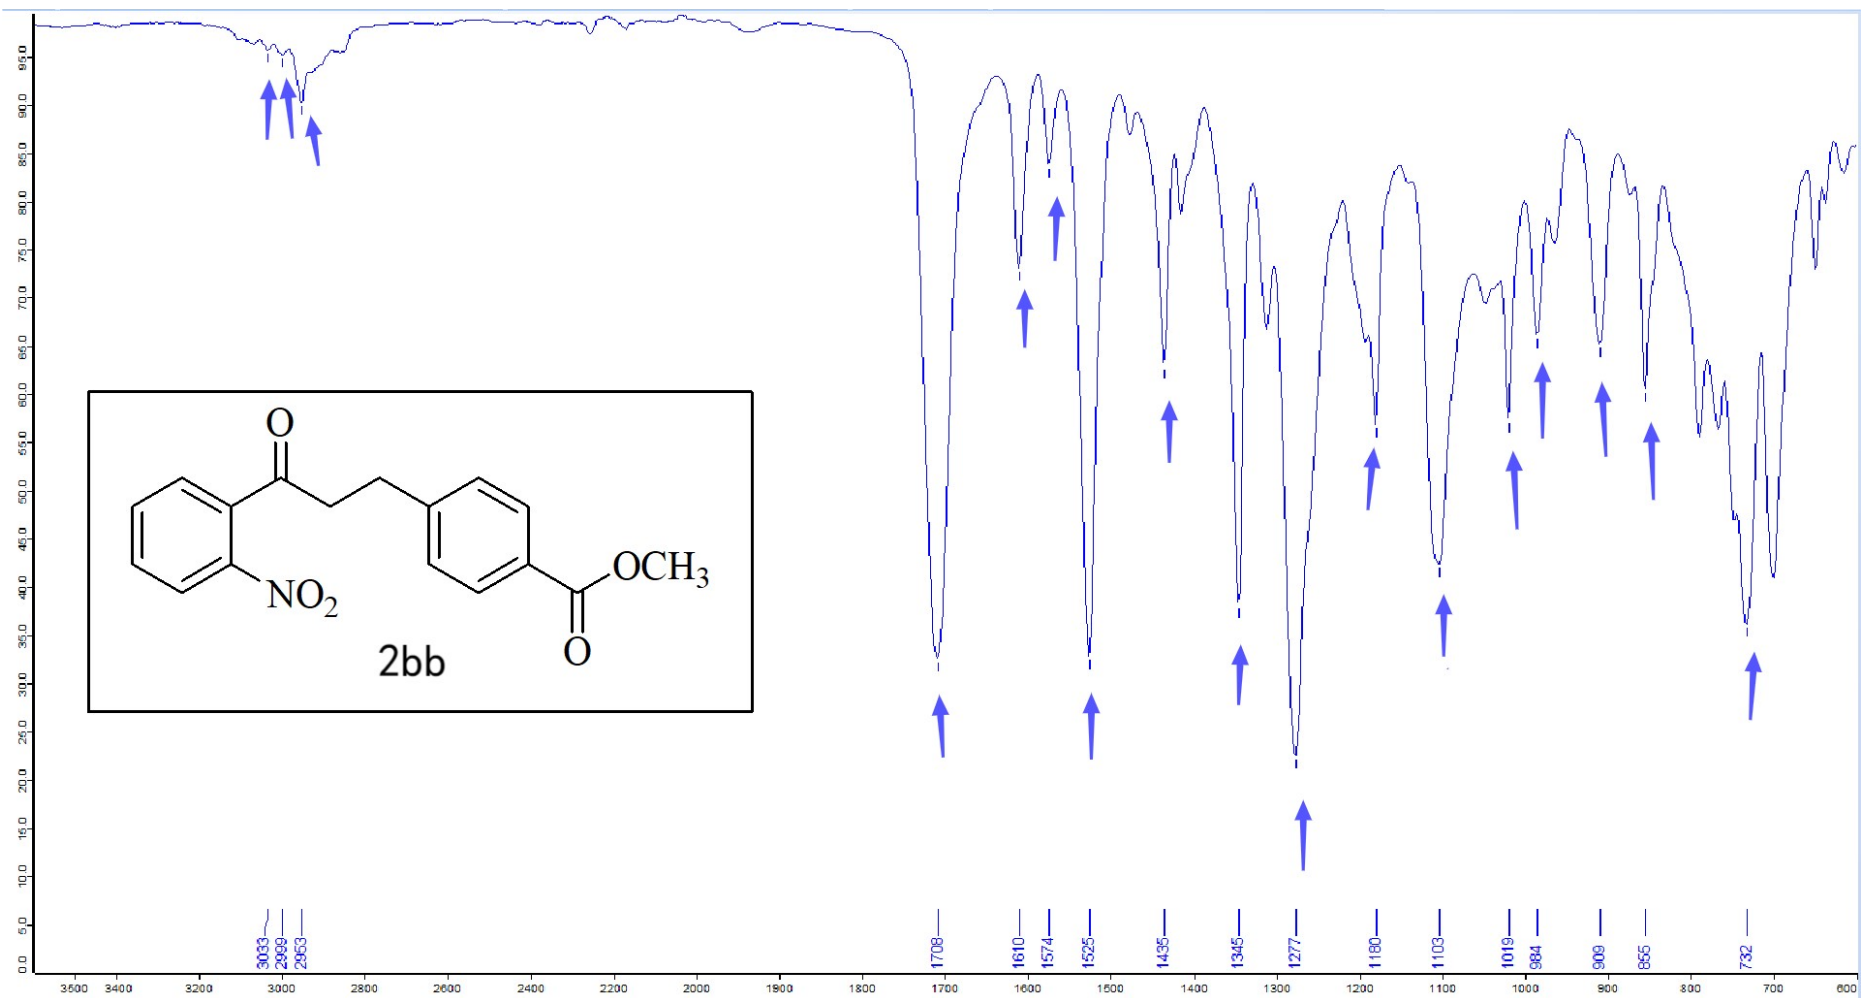

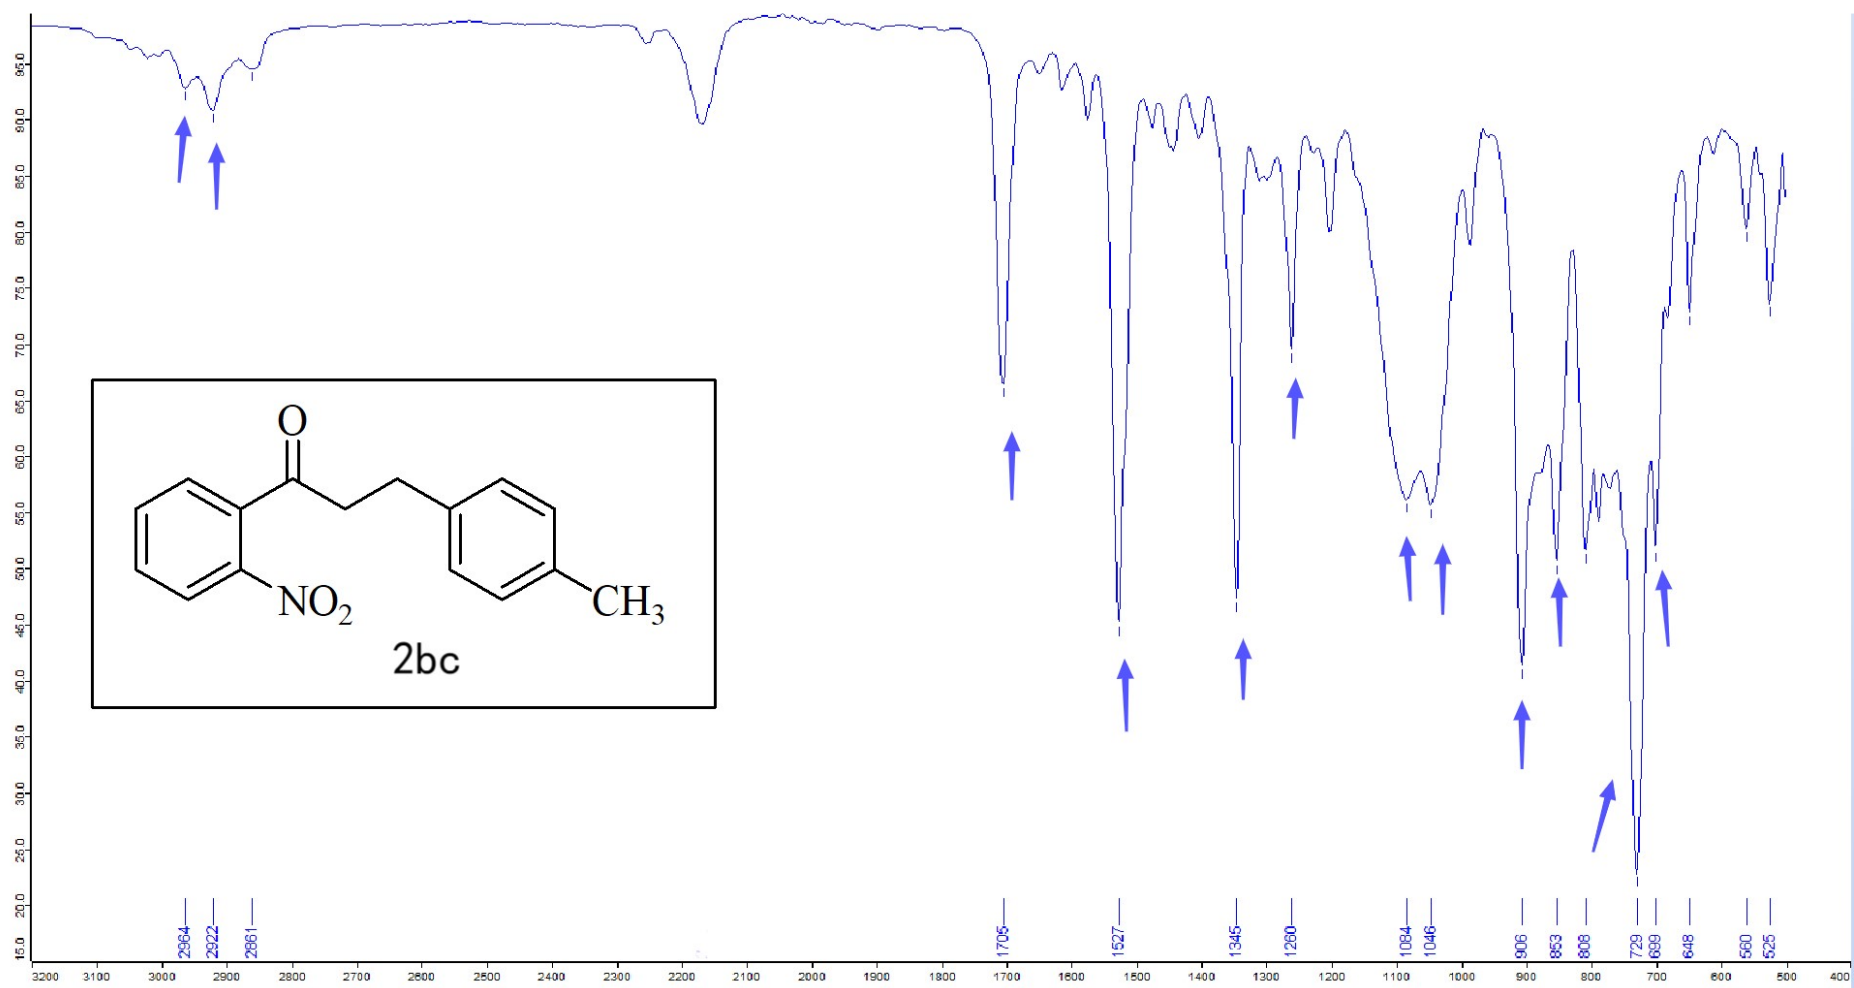

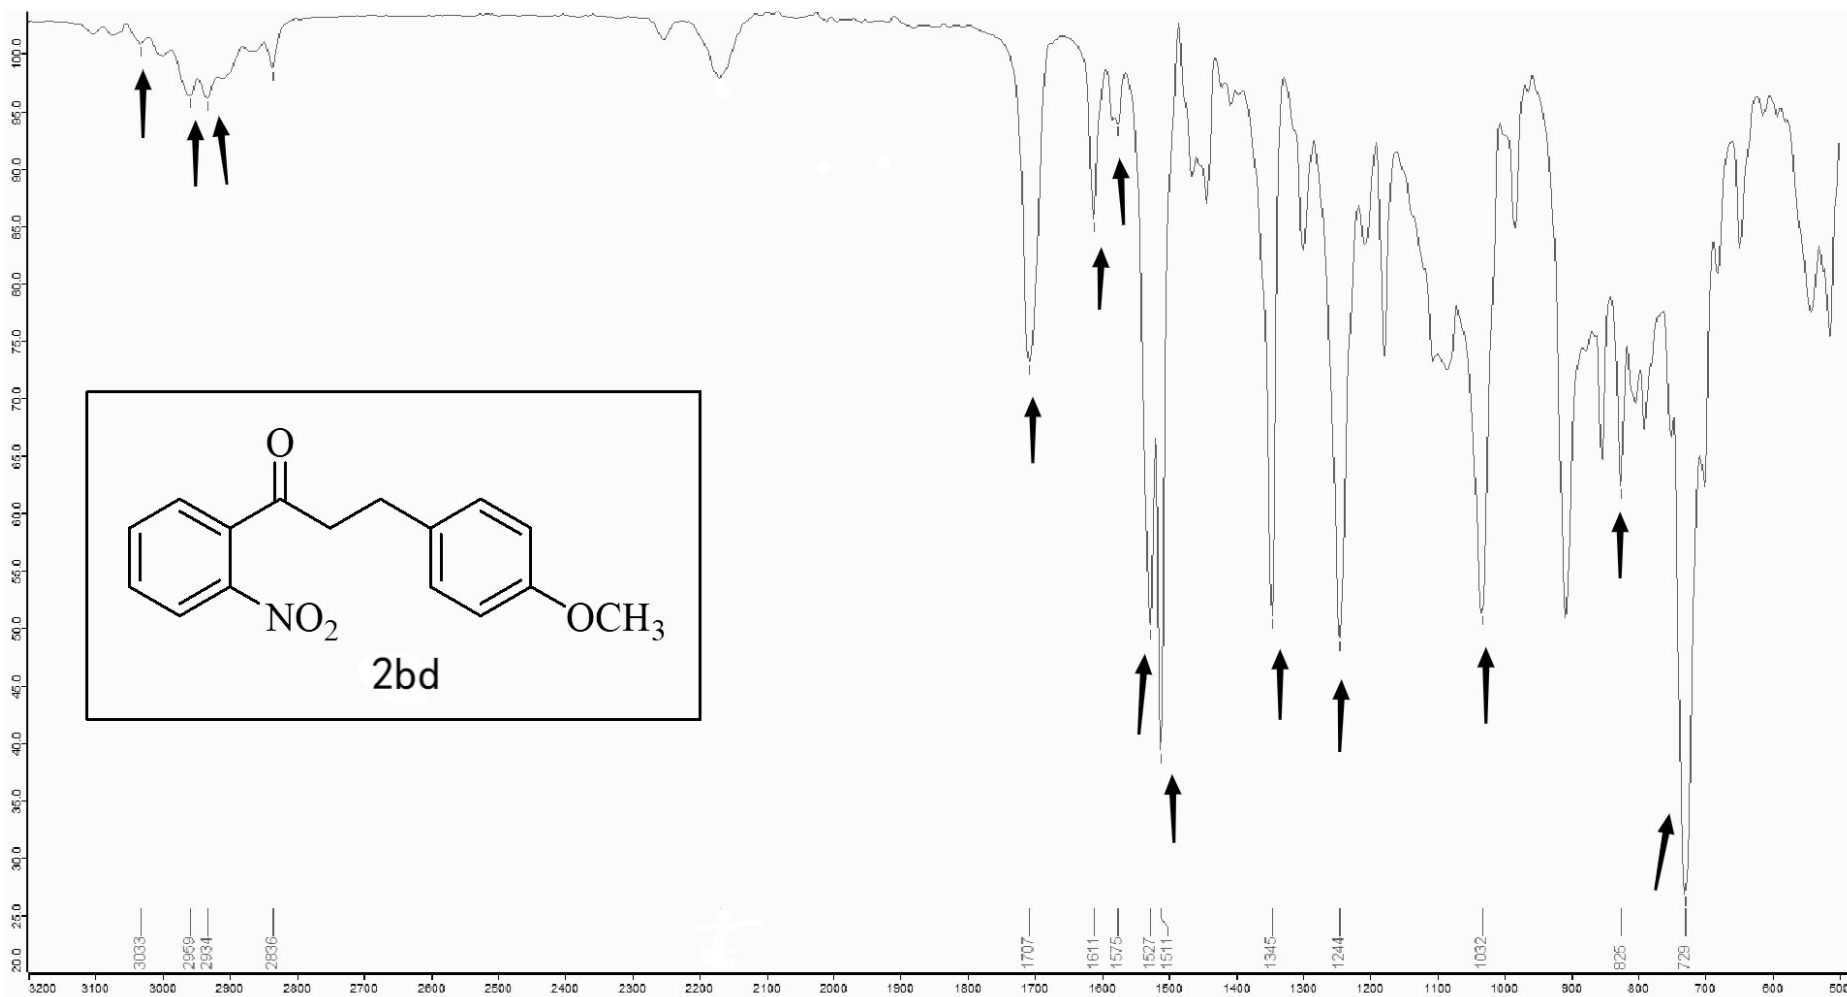

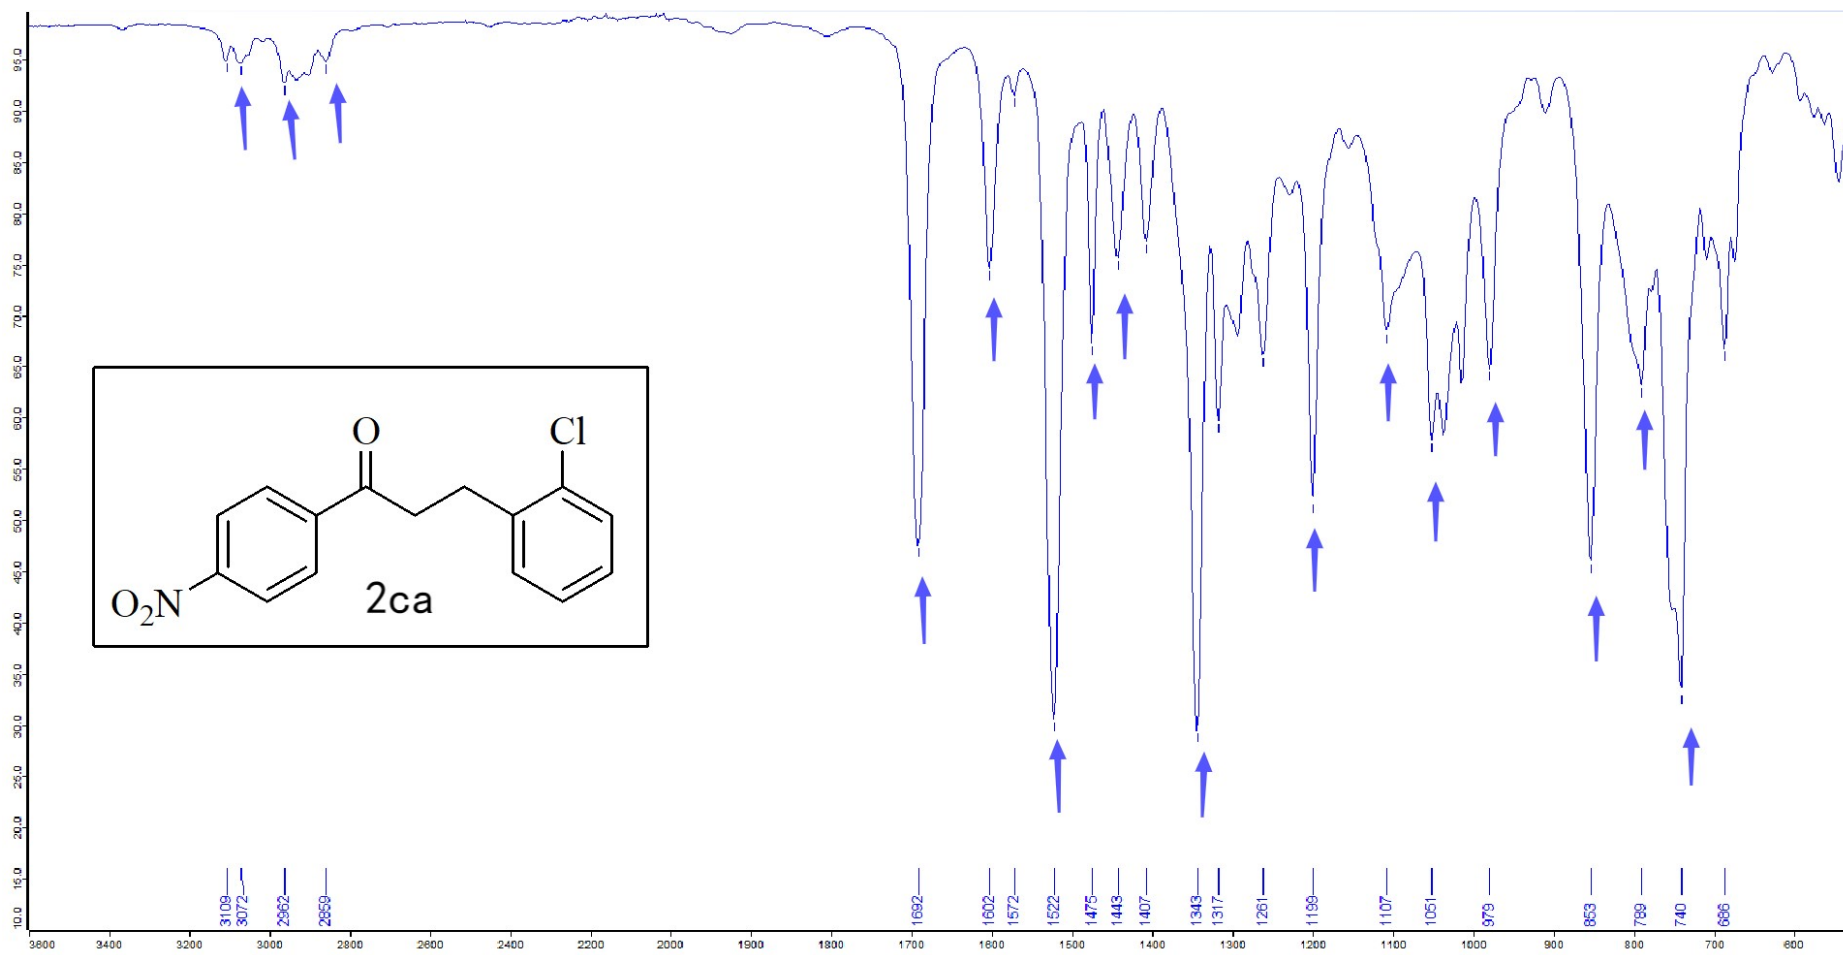

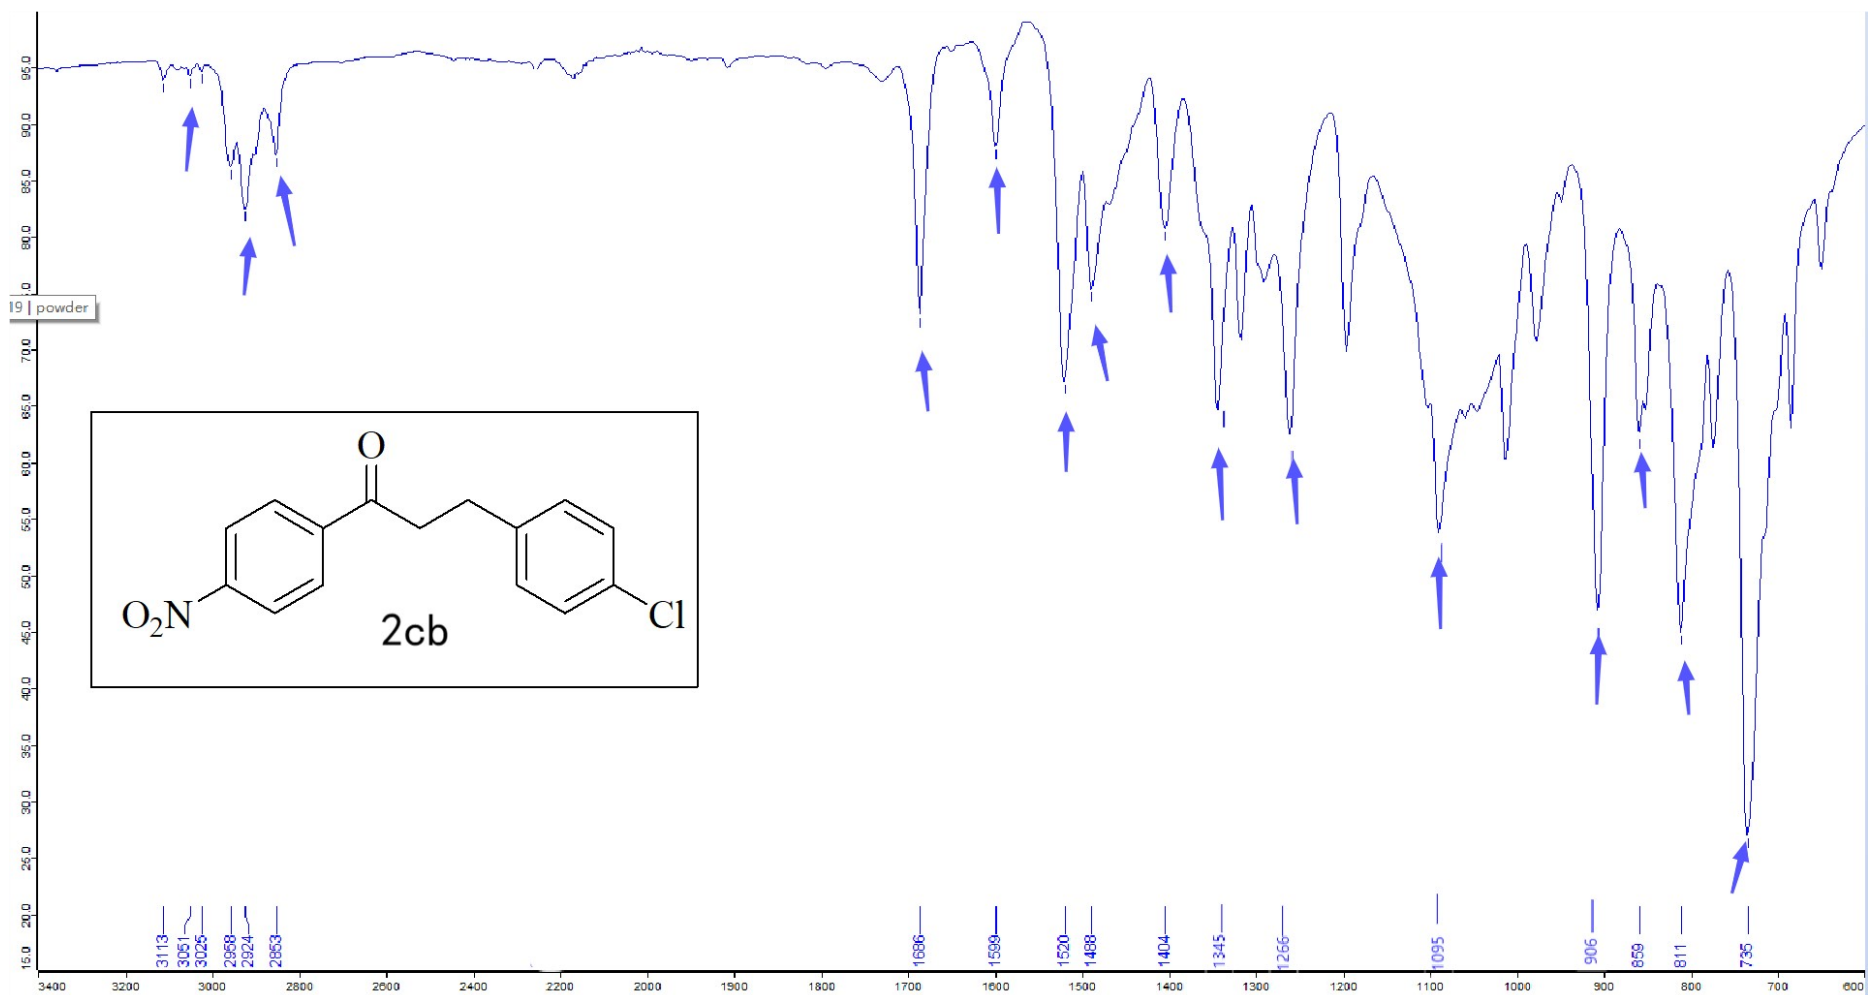

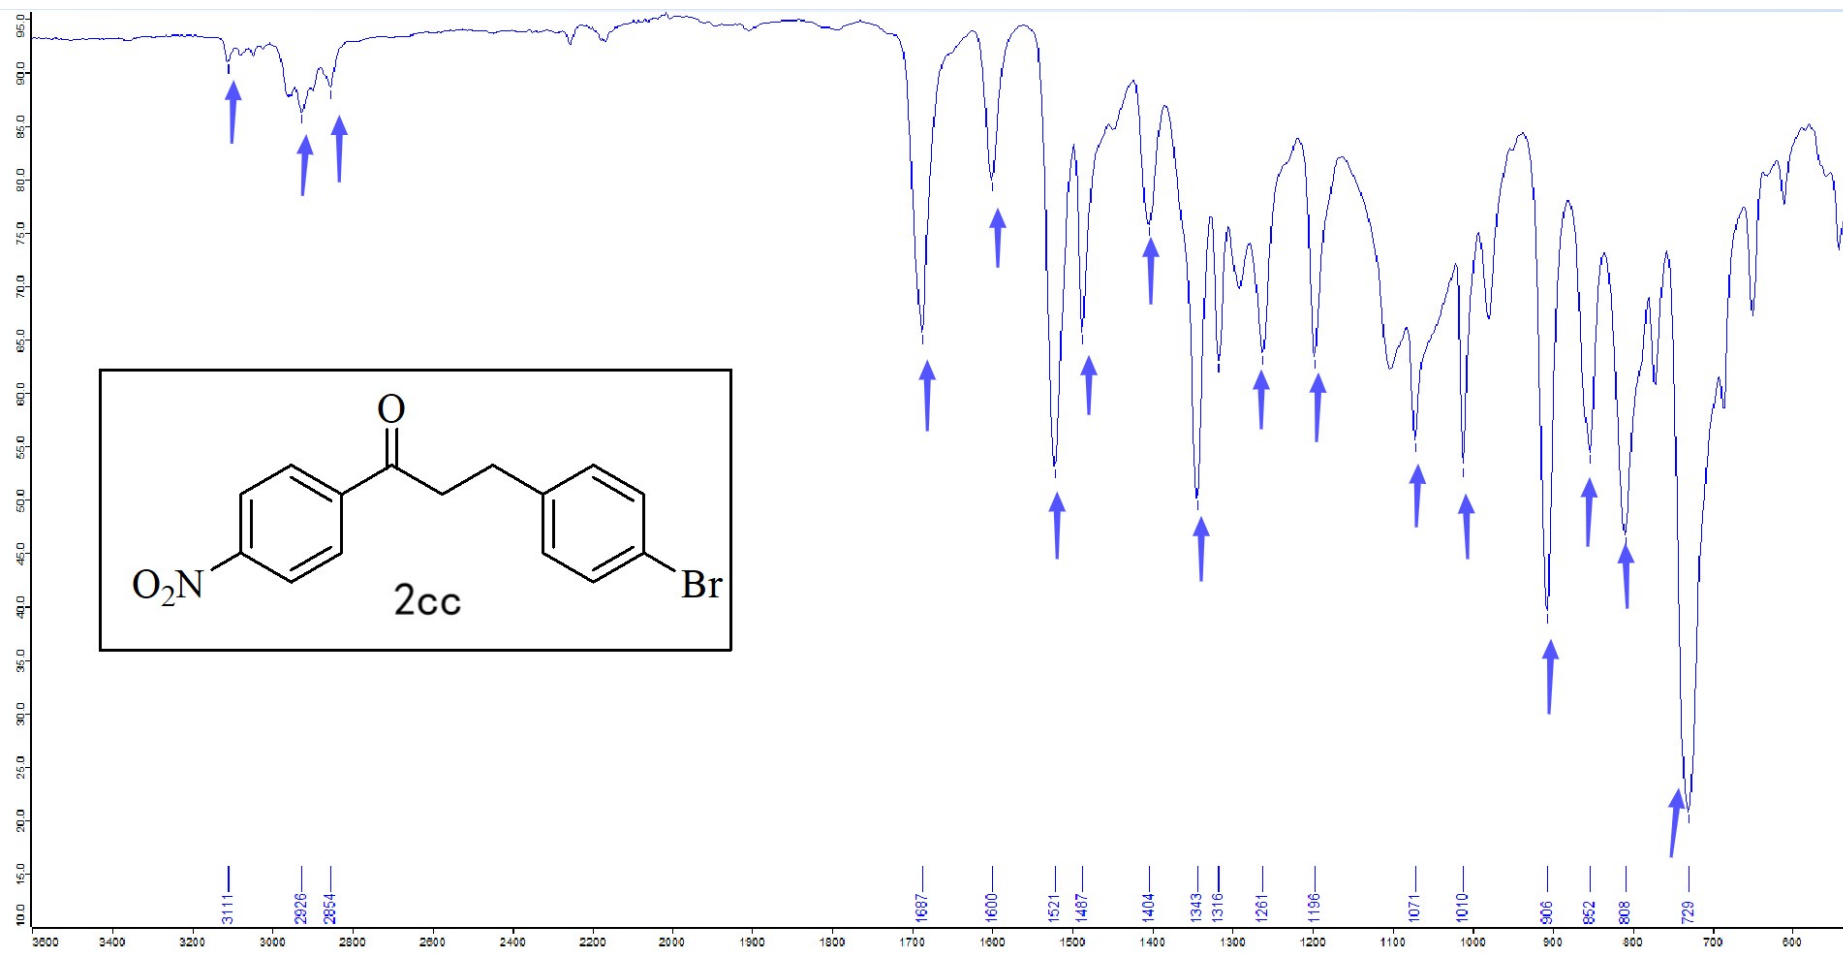

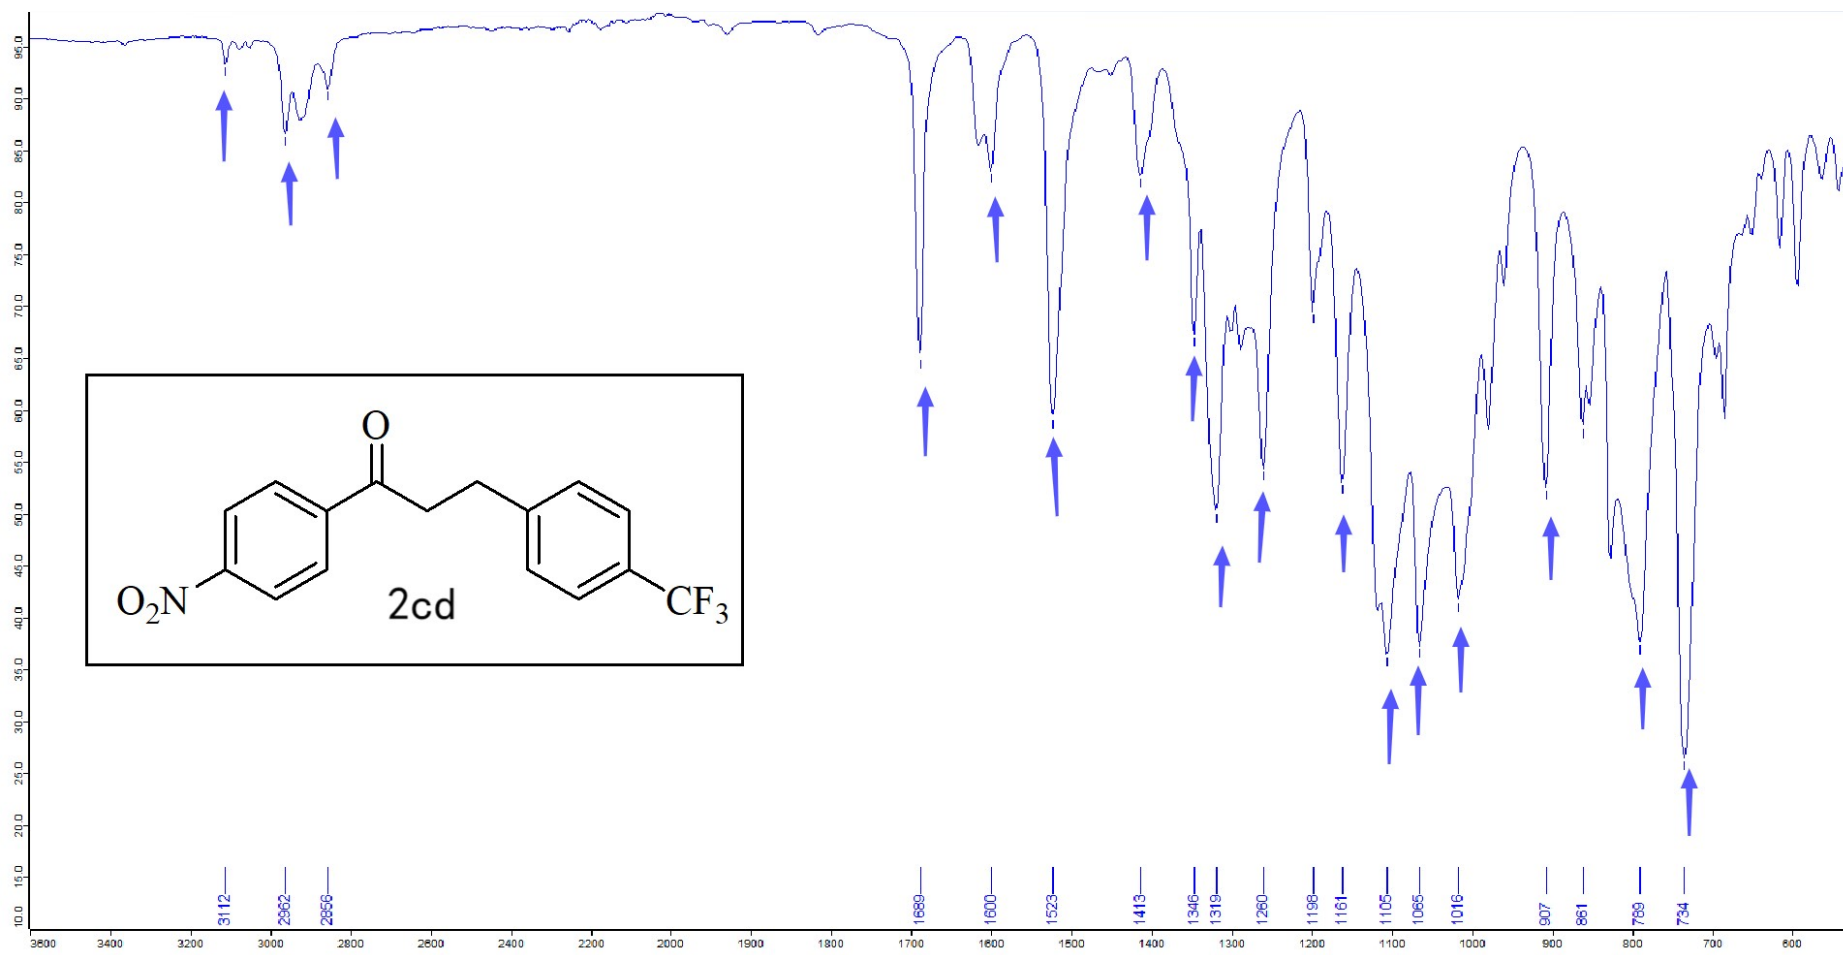



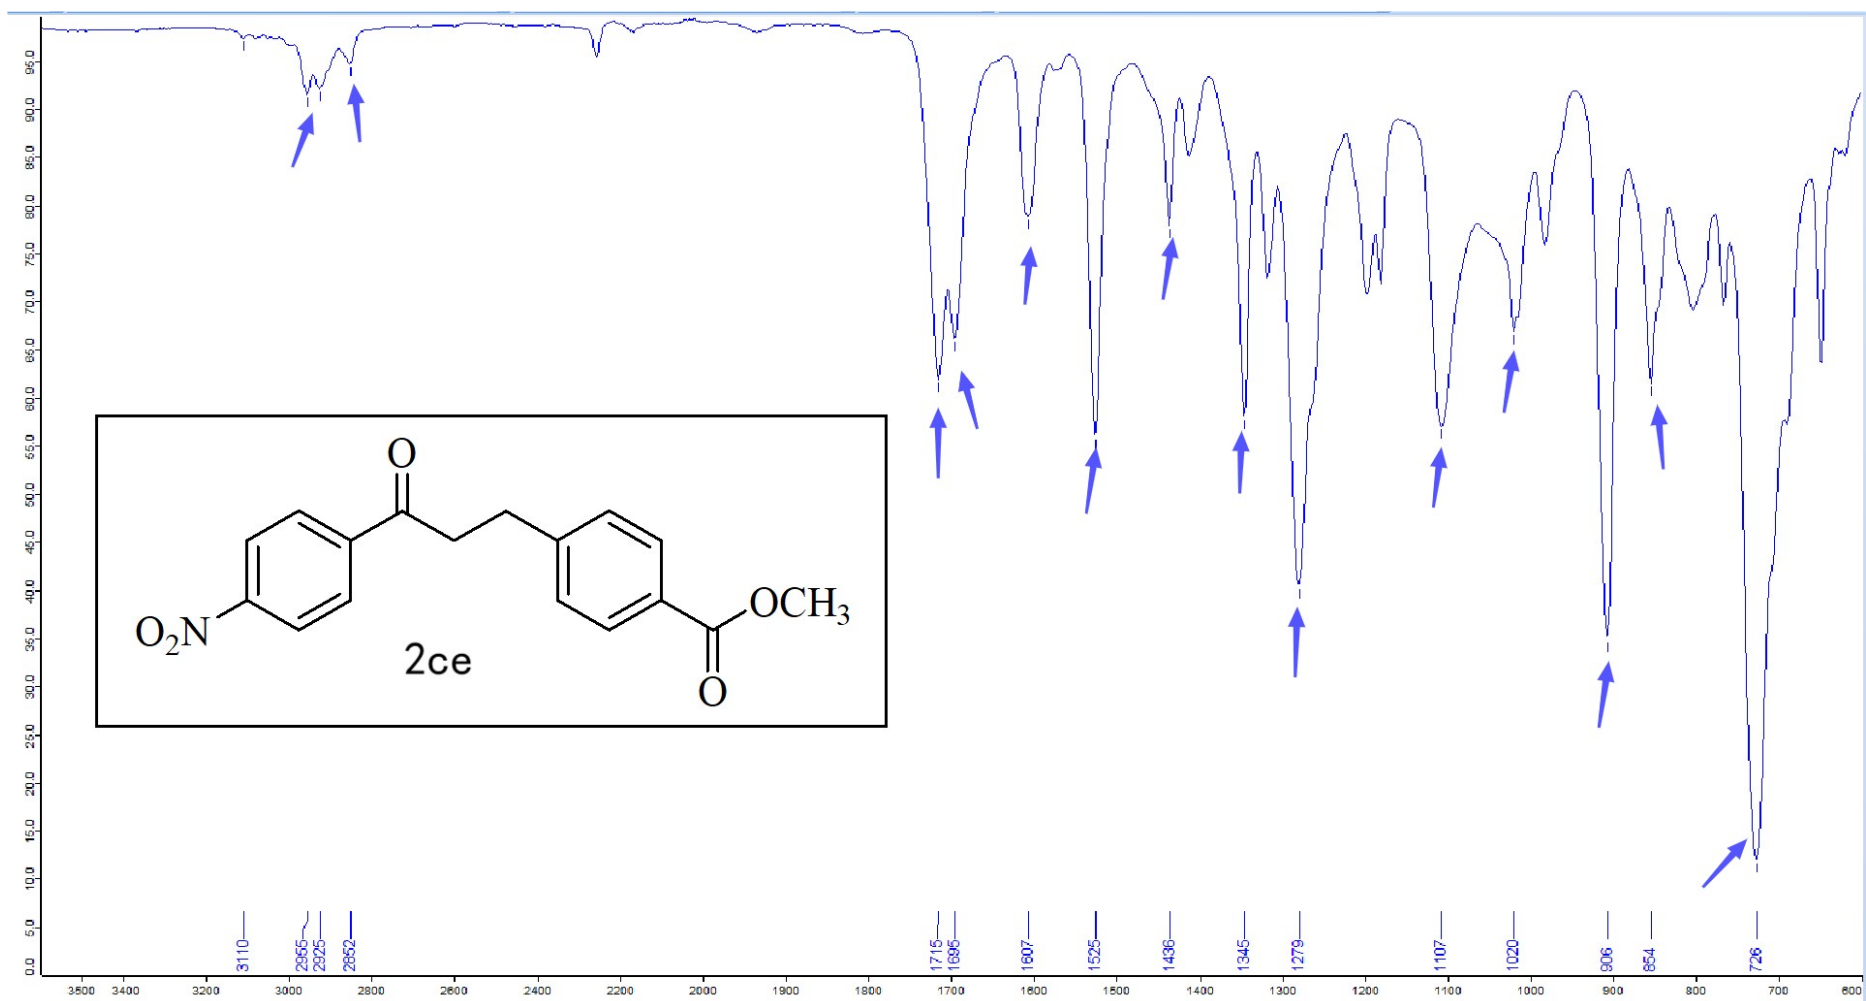

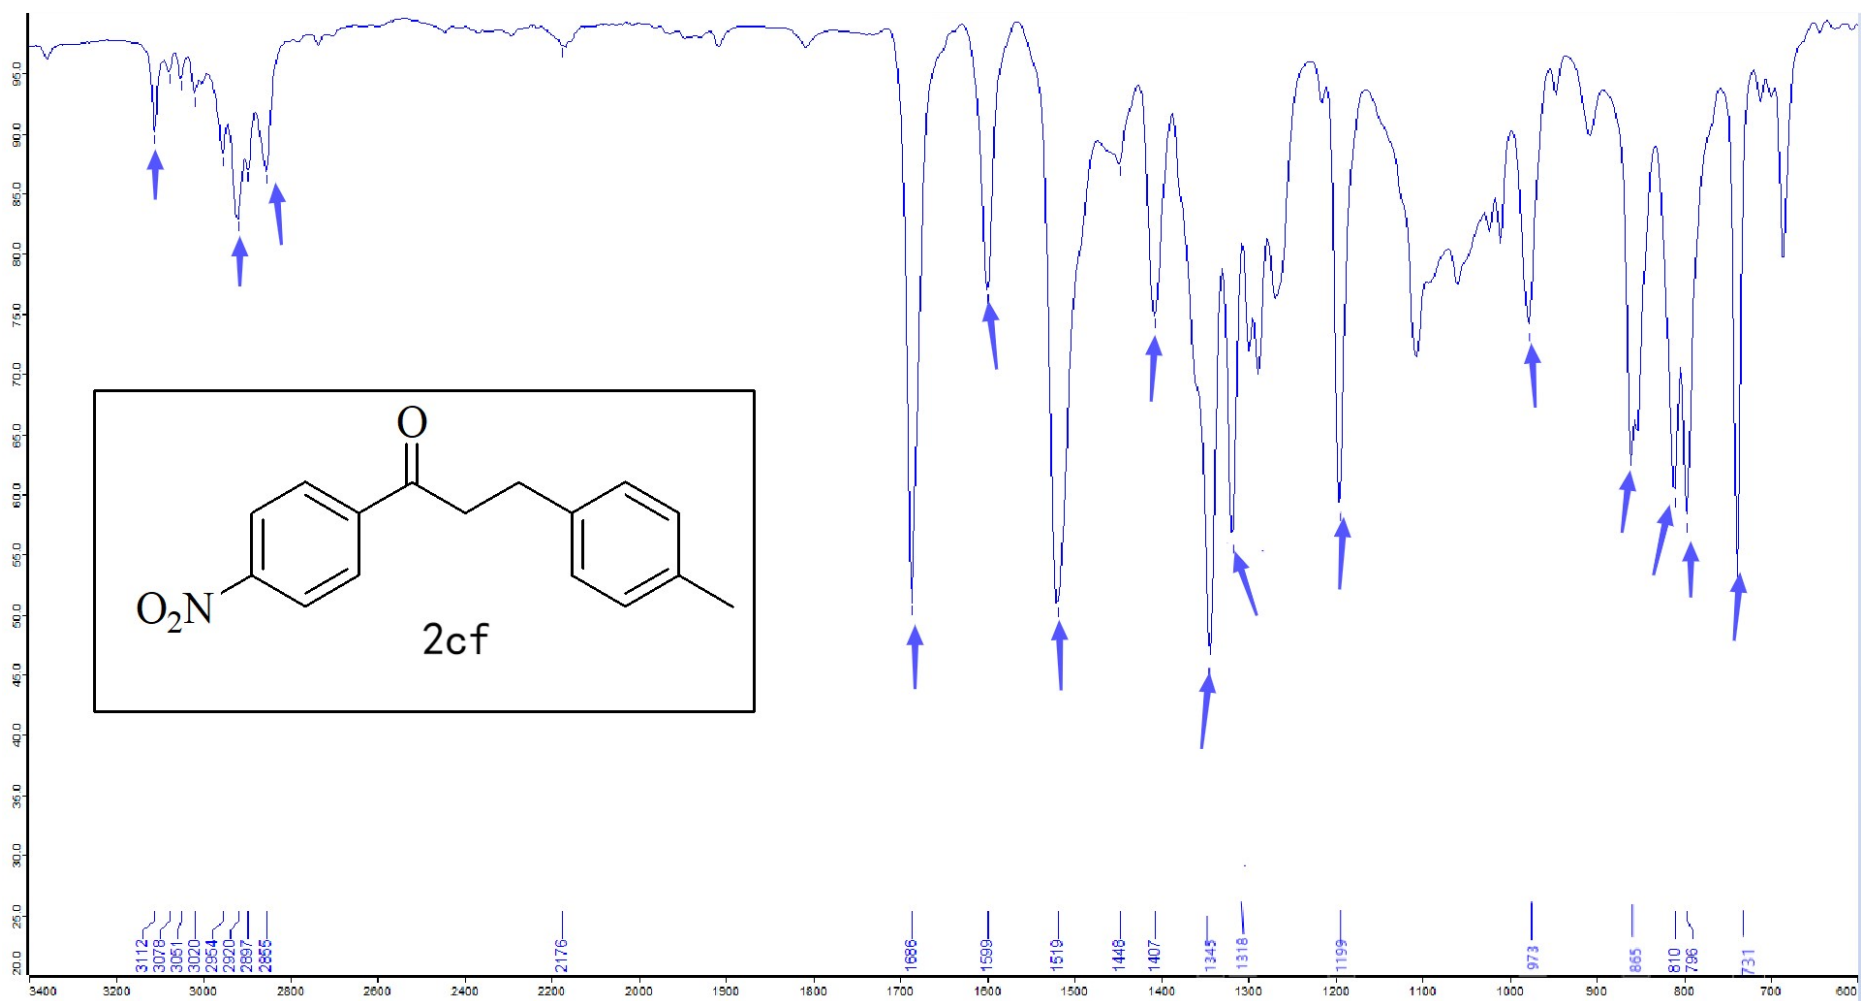

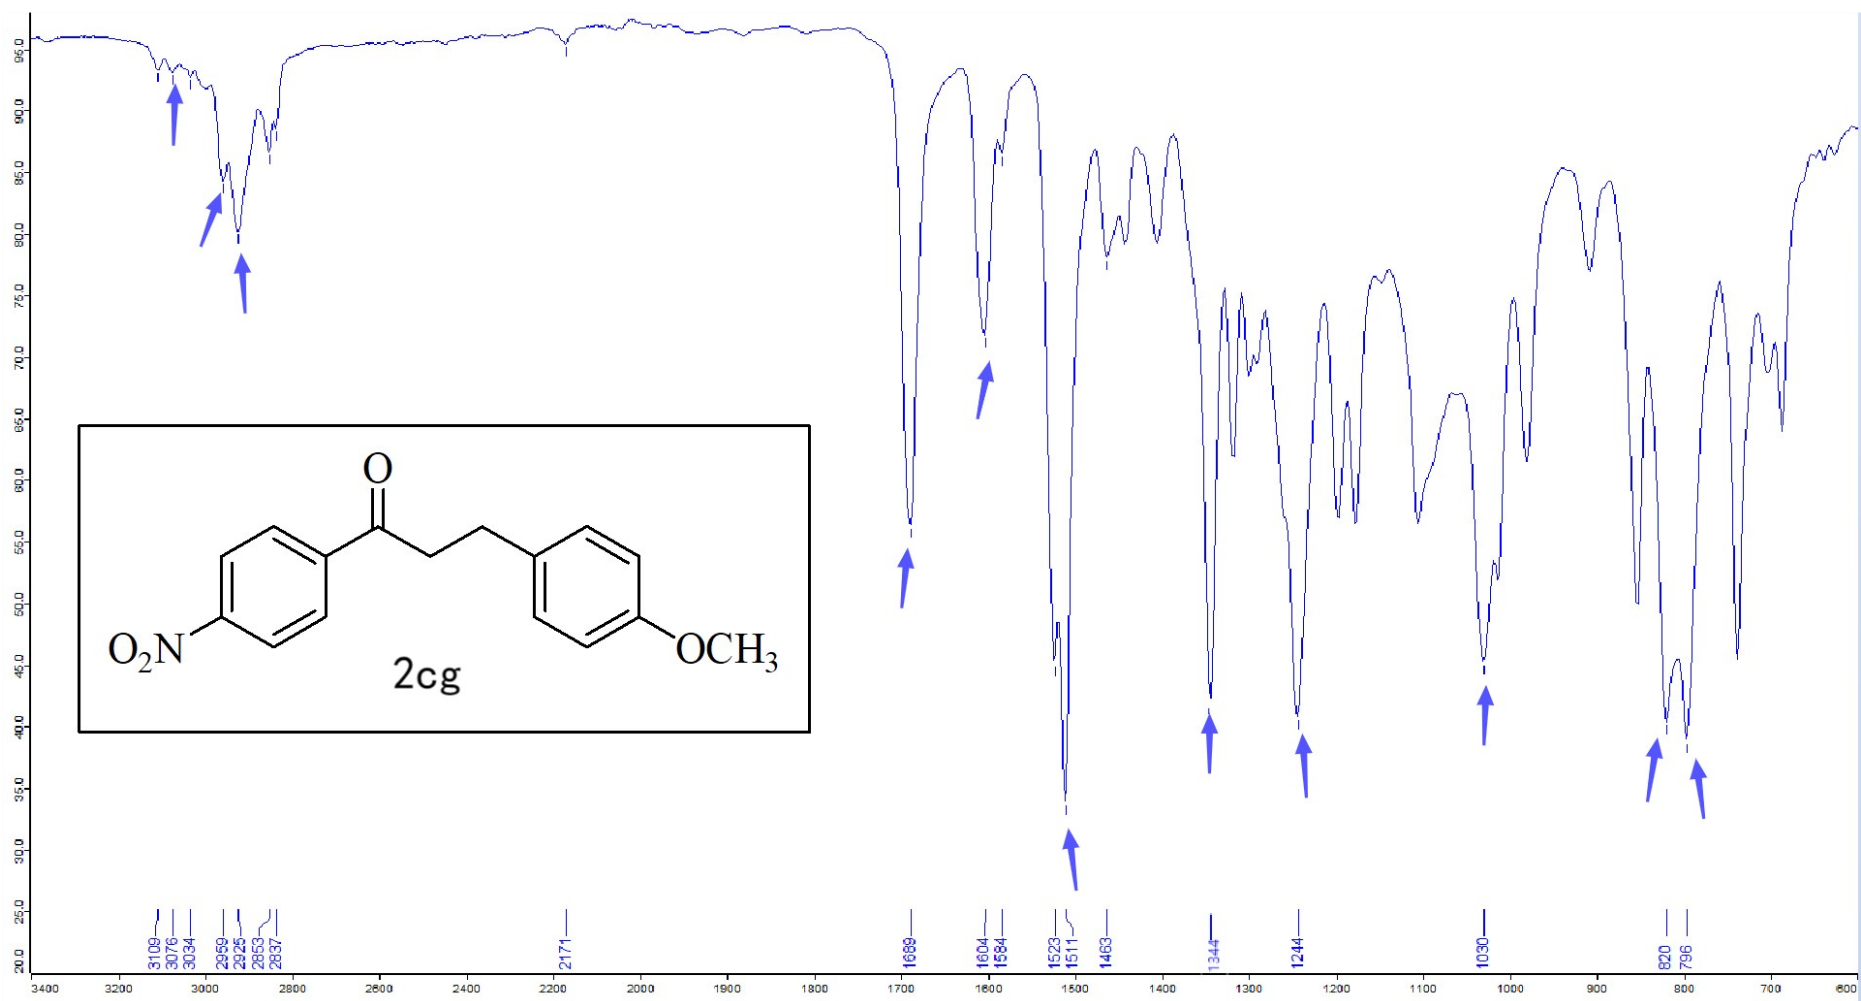

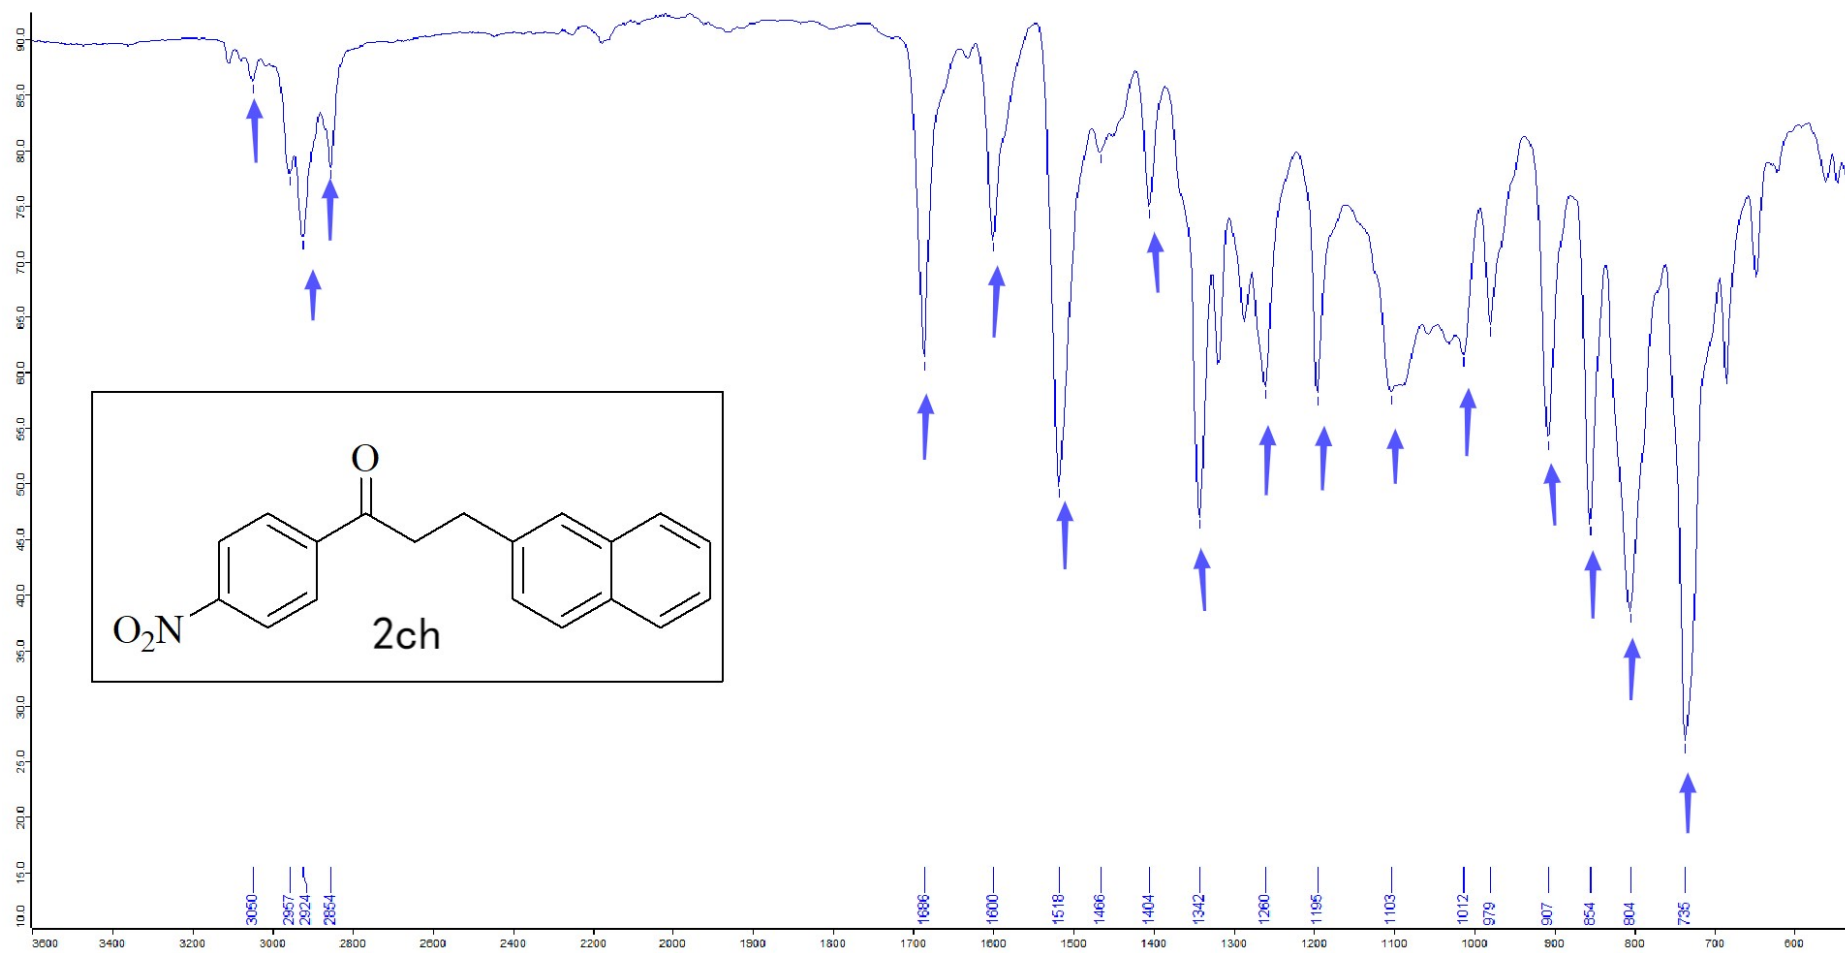

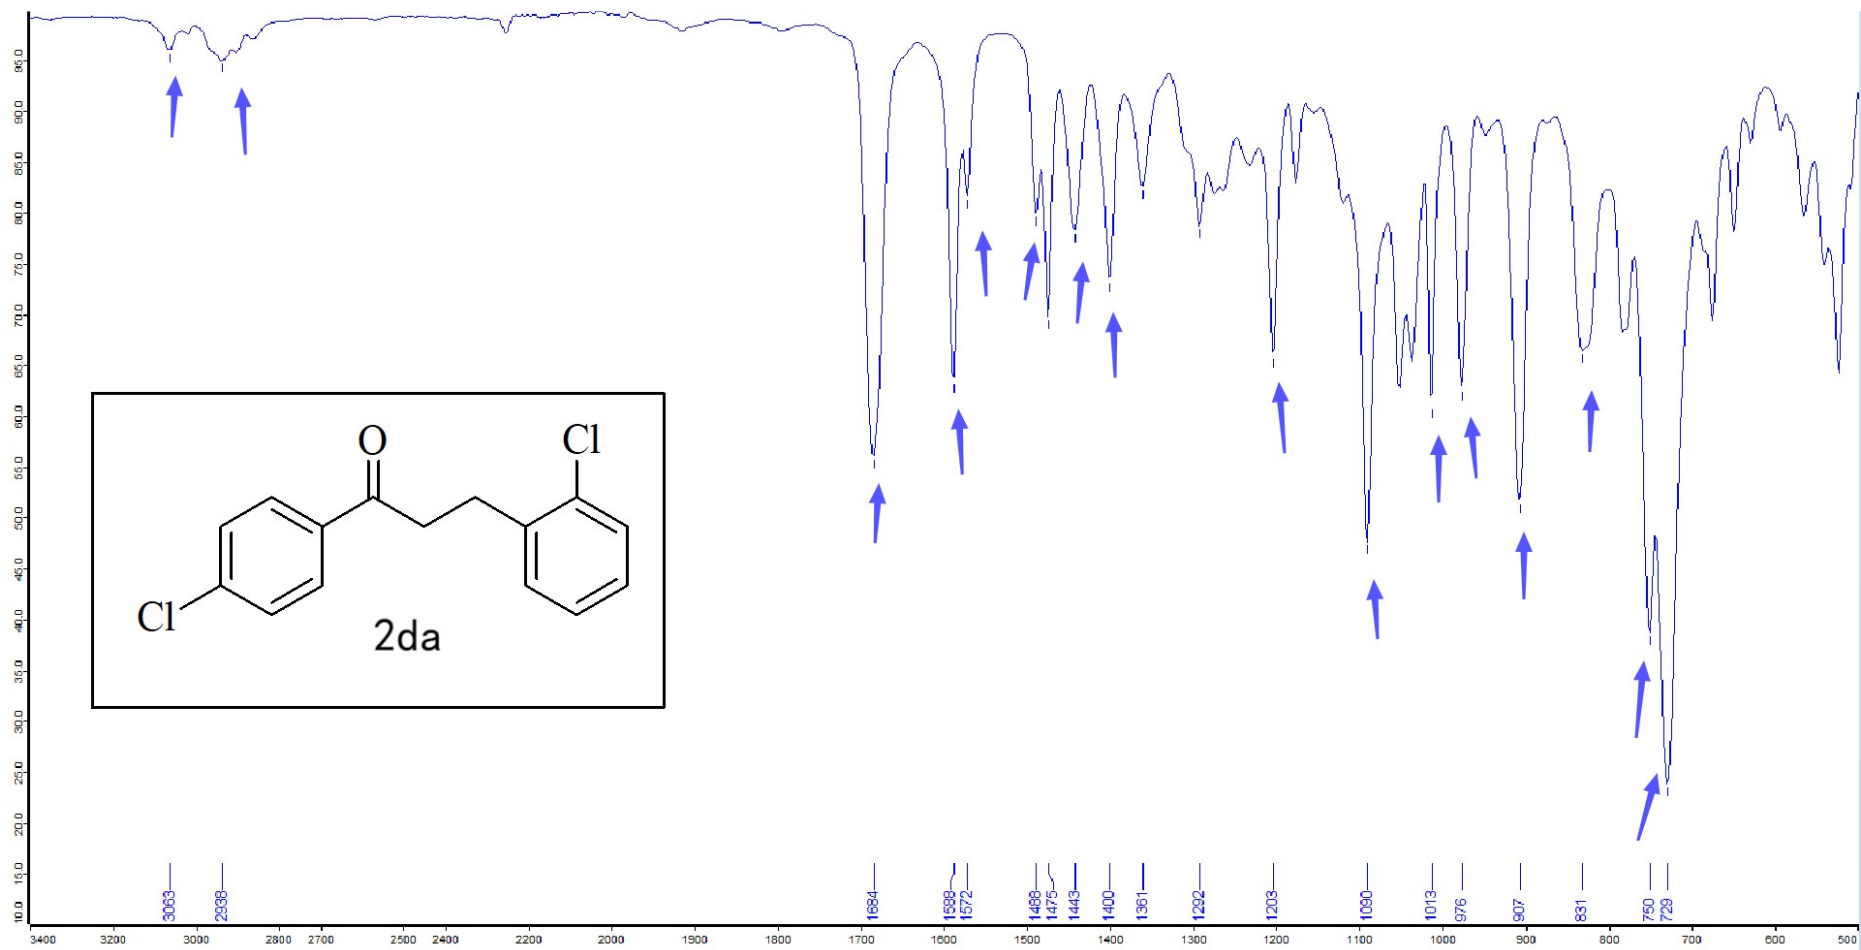

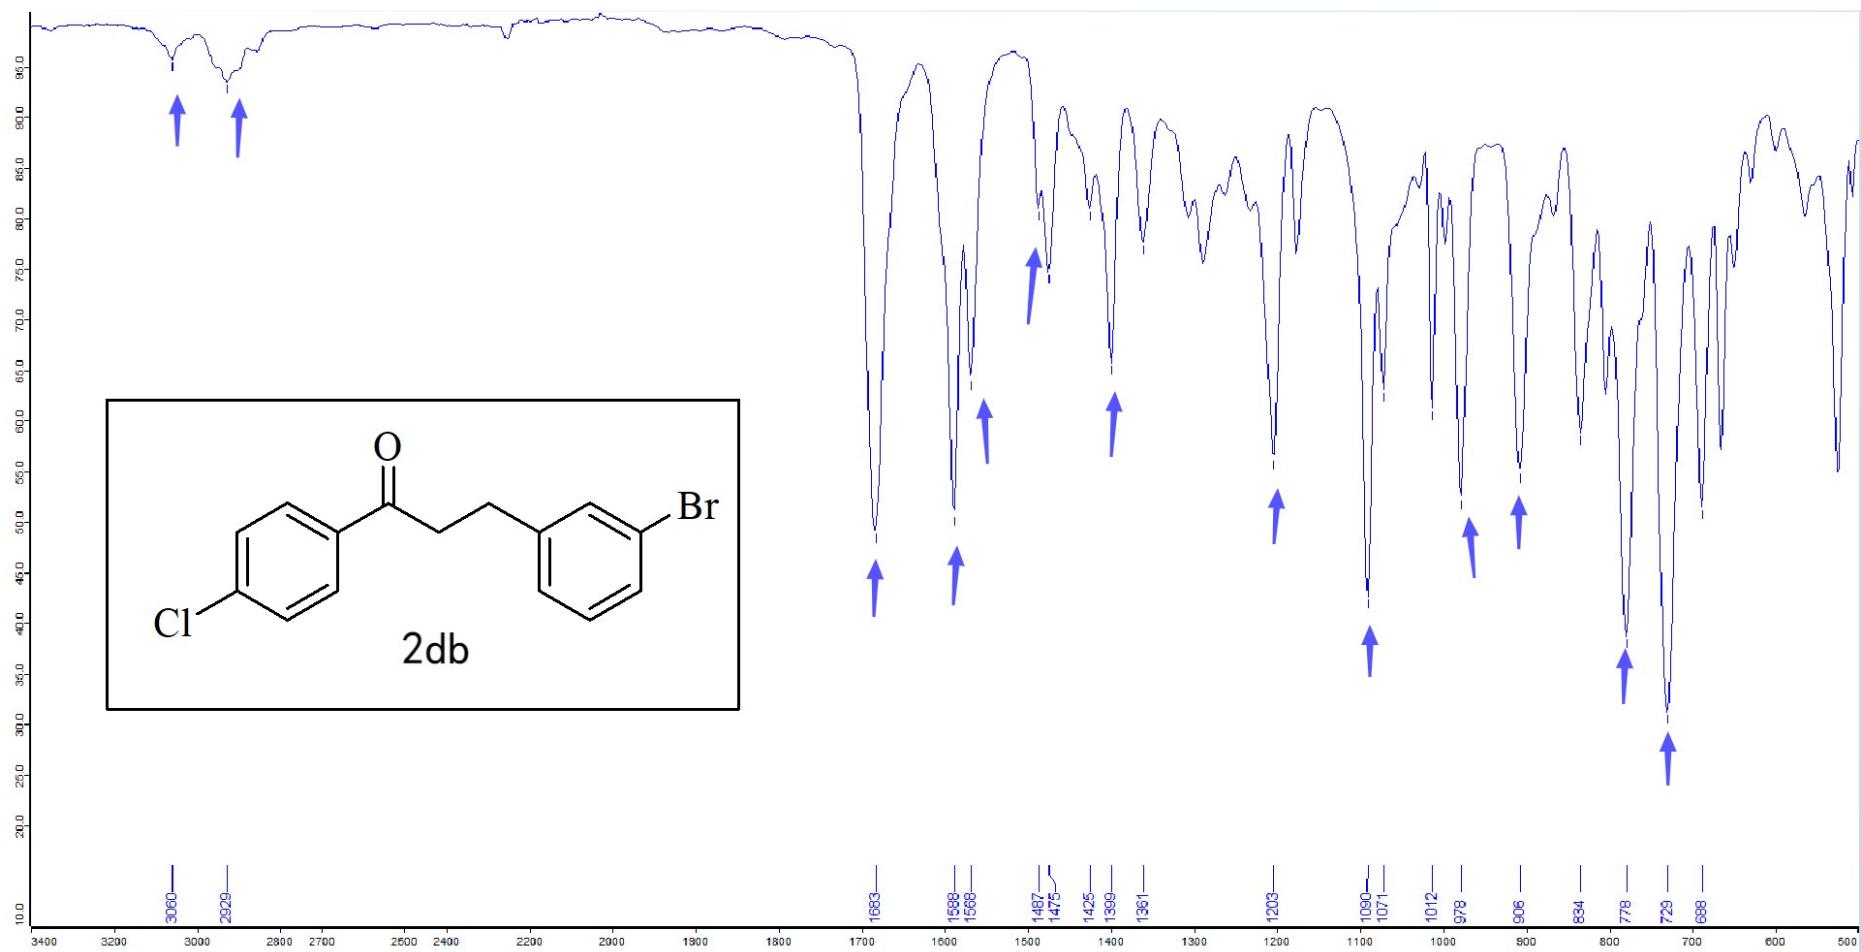

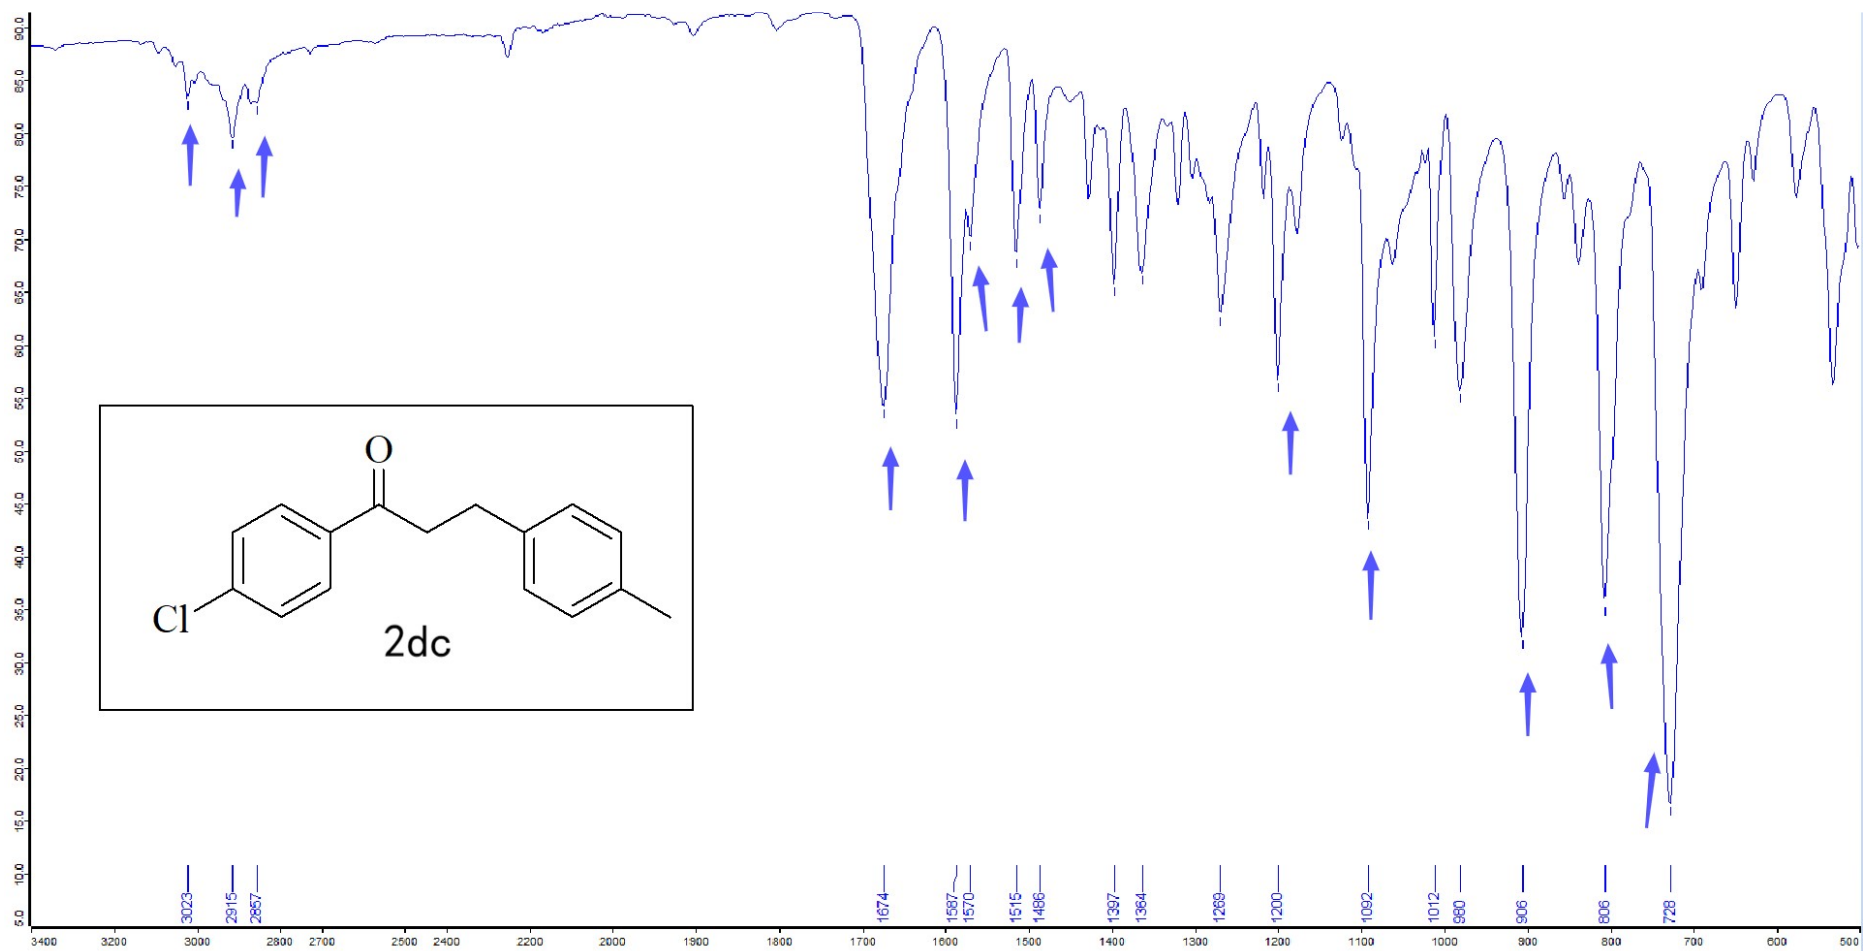

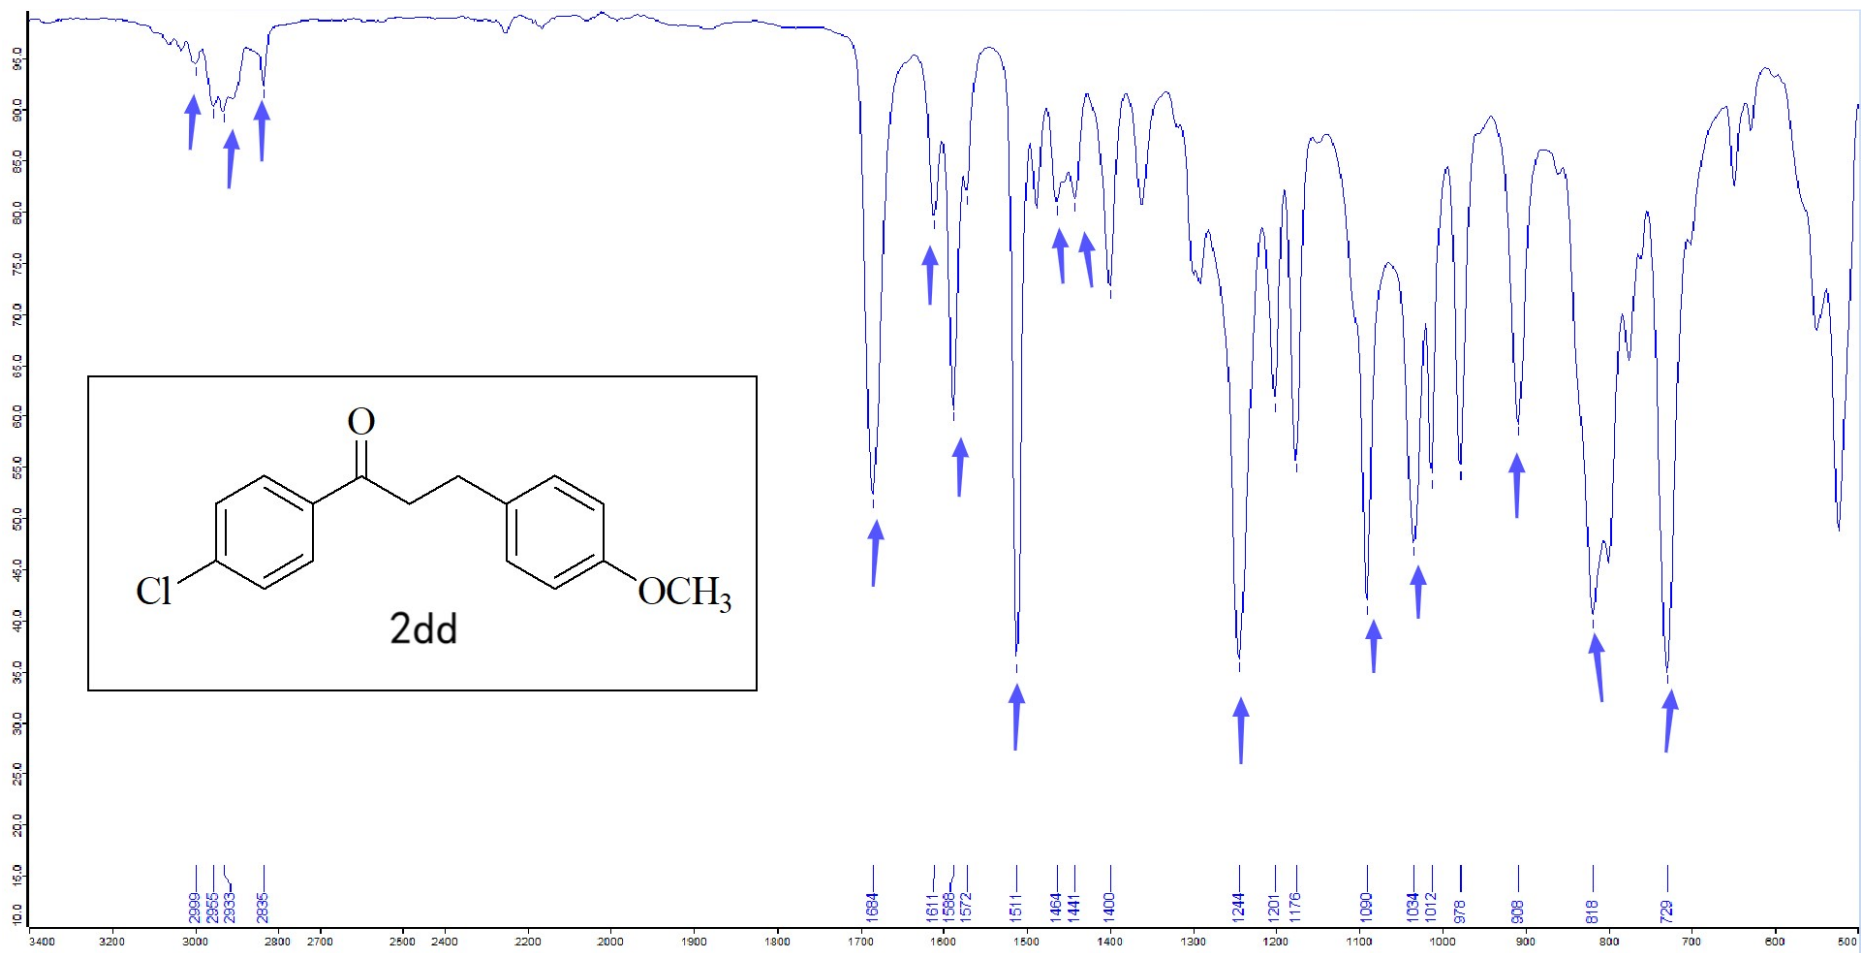



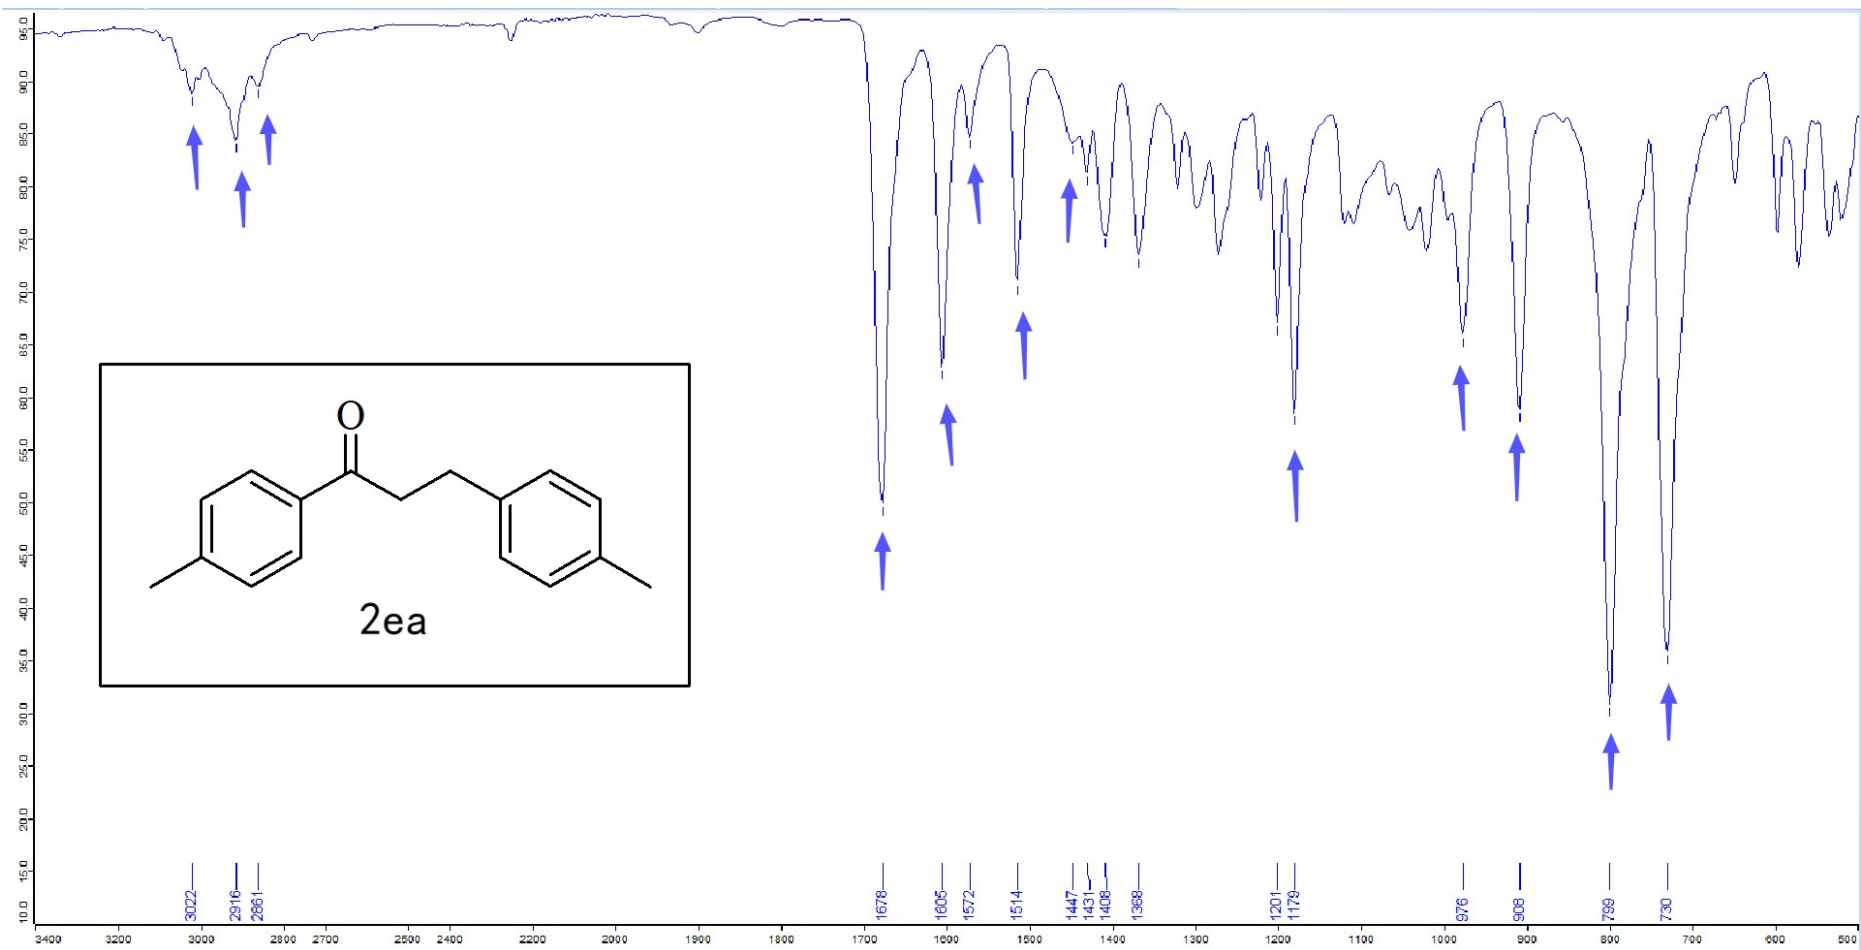

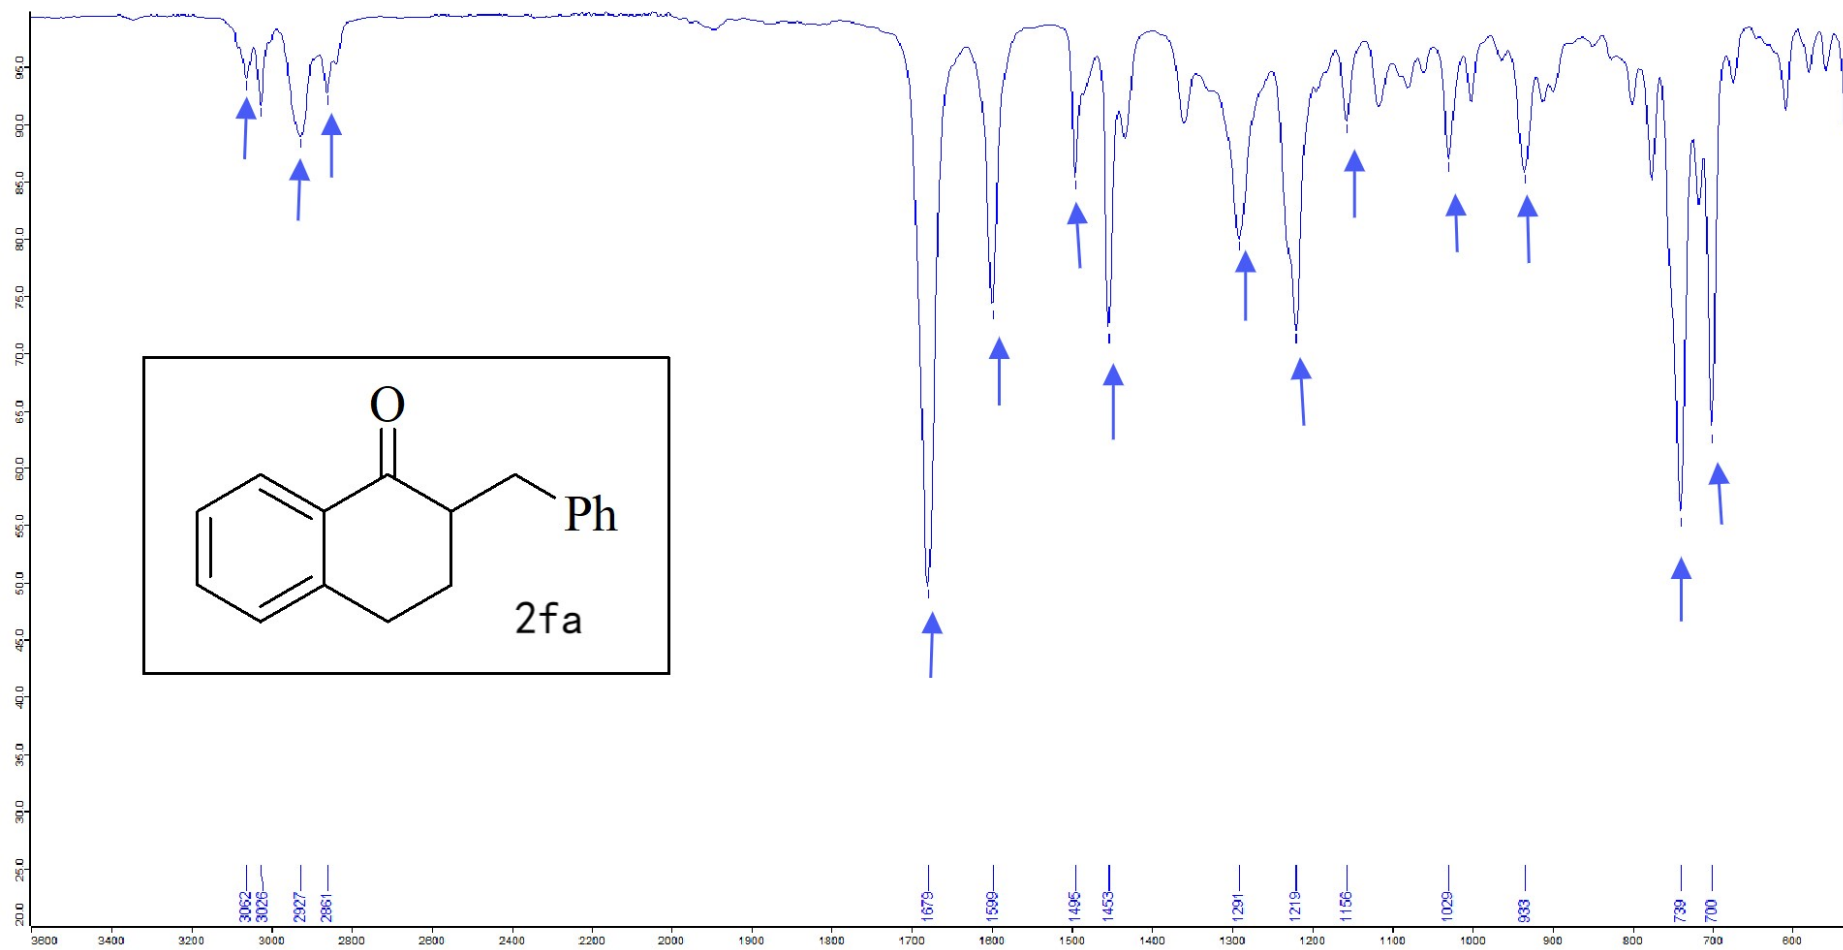

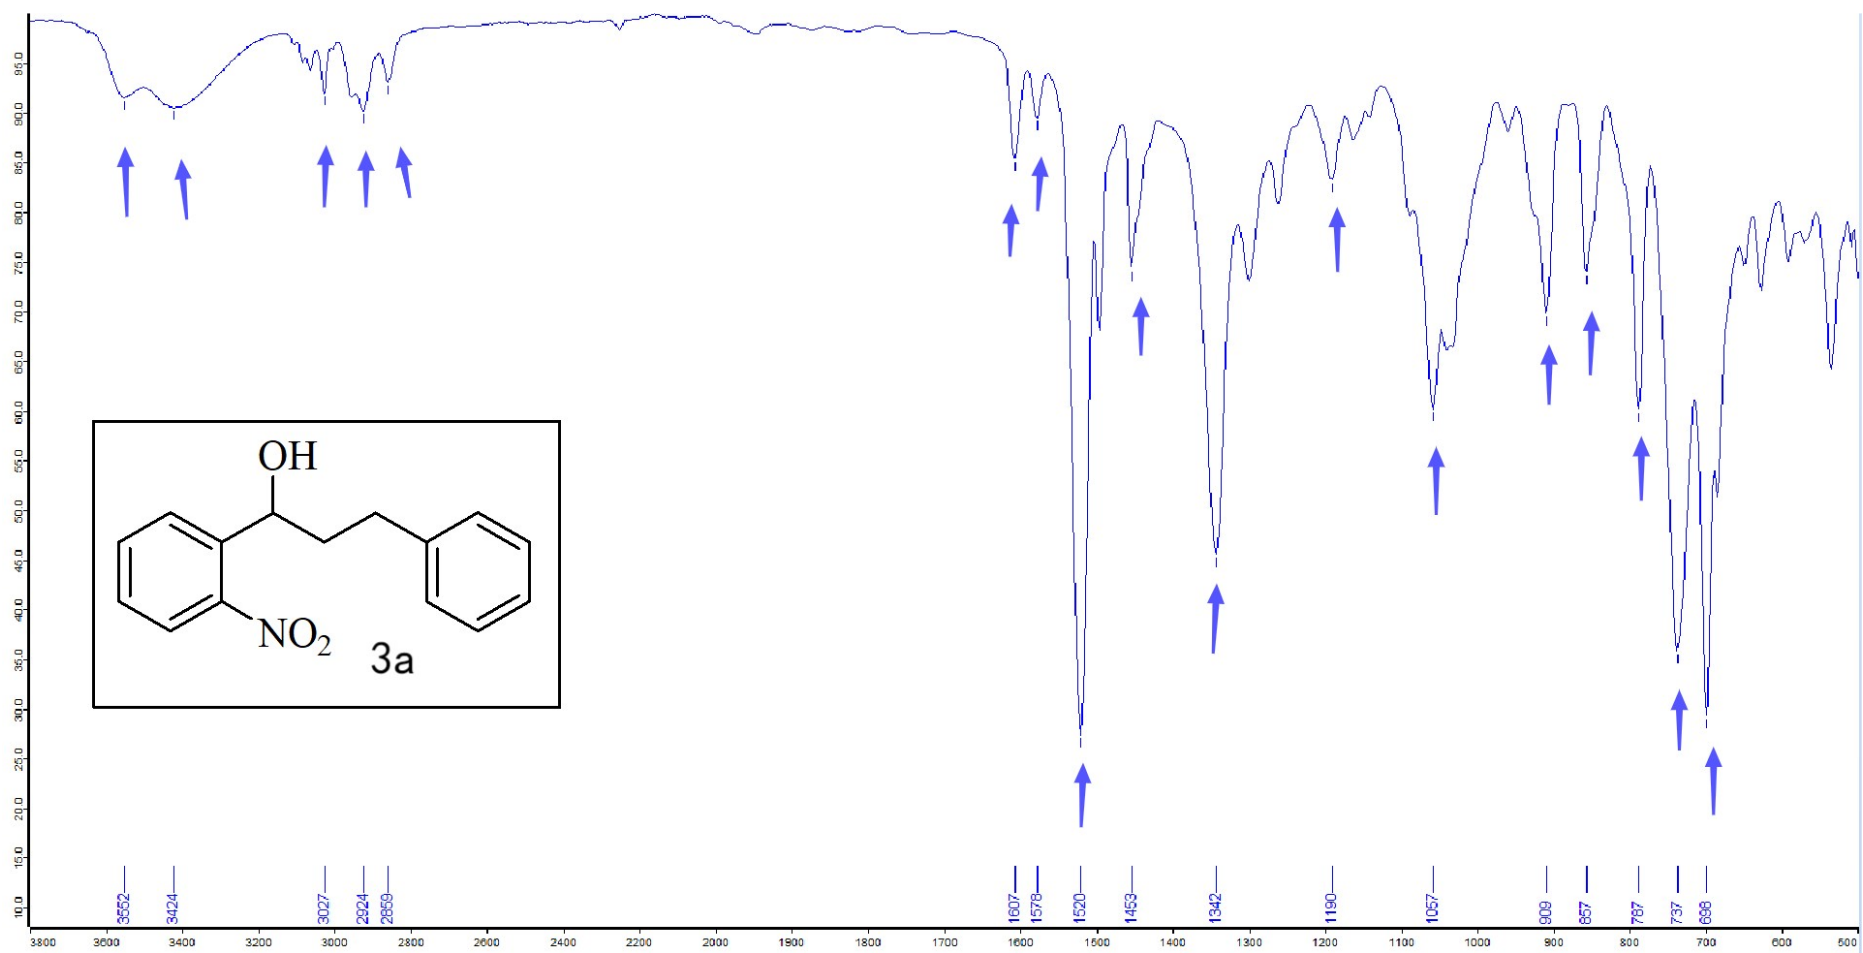

Supplement: d4ob00664j1.pdf [file d4ob00664j1.pdf]
